# Supplementary material
Source: PubMed Central journal article supplement (PMC5841913)

# Supporting Information

## Identification of Biologically Active Pyrimido[5,4-*b*]indoles that Prolong NF- $\kappa$ B Activation Without Intrinsic Activity

*Michael Chan,<sup>a</sup> Alast Ahmadi,<sup>a</sup> Shiyin Yao,<sup>a</sup> Fumi Sato-Kaneko,<sup>a</sup> Karen Messer,<sup>b</sup> Minya Pu,<sup>b</sup> Brandon Nguyen,<sup>a</sup> Tomoko Hayashi,<sup>a</sup> Maripat Corr,<sup>c</sup> Dennis A. Carson,<sup>a</sup> Howard B. Cottam,<sup>a</sup> Nikunj M. Shukla<sup>\*a</sup>*

- a. Moores UCSD Cancer Center, University of California San Diego, La Jolla, CA 92093, USA.
- b. Division of Biostatistics, University of California San Diego, La Jolla, CA 92093, USA.
- c. Department of Medicine, University of California San Diego, La Jolla, CA 92093, USA.

|    |                                                                                                                                                                                                                               |       |
|----|-------------------------------------------------------------------------------------------------------------------------------------------------------------------------------------------------------------------------------|-------|
| 1. | Supporting Information, Figures S1-S3.....                                                                                                                                                                                    | 2-4   |
| 2. | Supporting Information, Table S1.....                                                                                                                                                                                         | 5     |
| 3. | References.....                                                                                                                                                                                                               | 6     |
| 4. | Syntheses and characterization for compounds <b>5</b> {4-6}.....                                                                                                                                                              | 7     |
| 5. | Chemistry experimental section with compound names, reaction yields, <sup>1</sup> H NMR and MS characterization data for final compounds as well as <sup>13</sup> C NMR and HRMS characterization data for key compounds..... | 8-20  |
| 6. | <sup>1</sup> H NMR and LC-MS spectra for final compounds as well as <sup>13</sup> C NMR and HRMS spectra for key compounds.....                                                                                               | 21-75 |

## Supporting Information Figure S1

Hit confirmation rates using different approaches of hit selection <sup>a</sup>

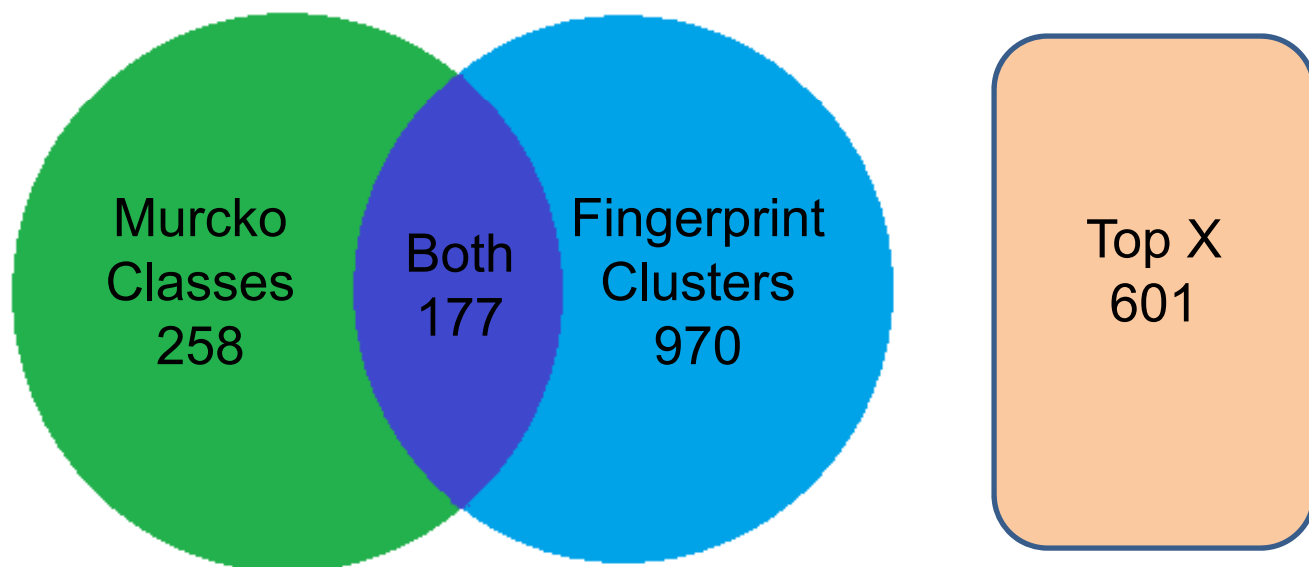

| Confirmation rates by different approaches for hit selection |                          |                  |                        |
|--------------------------------------------------------------|--------------------------|------------------|------------------------|
| Approach methods                                             | # hits in primary screen | # confirmed hits | Confirmation rates (%) |
| <b>Structural approach</b>                                   | <b>1405</b>              | <b>295</b>       | <b>21</b>              |
| a. Murcko                                                    | 435                      | 134              | 30.80                  |
| b. Daylight                                                  | 1147                     | 232              | 20.2                   |
| c. Murcko+Daylight                                           | 177                      | 71               | 40.1                   |
| <b>TopX</b>                                                  | <b>601</b>               | <b>112</b>       | <b>18.6</b>            |

<sup>a</sup> Confirmation rates by different approaches used for hits selection shows that structural clustering approach improves confirmation rates.

Supporting Information Figure S2  
 (Left) mTLR4 agonistic activities  
 and (Right) Intrinsic NF- $\kappa$ B inducing activities  
 of synthesized compounds <sup>a</sup>

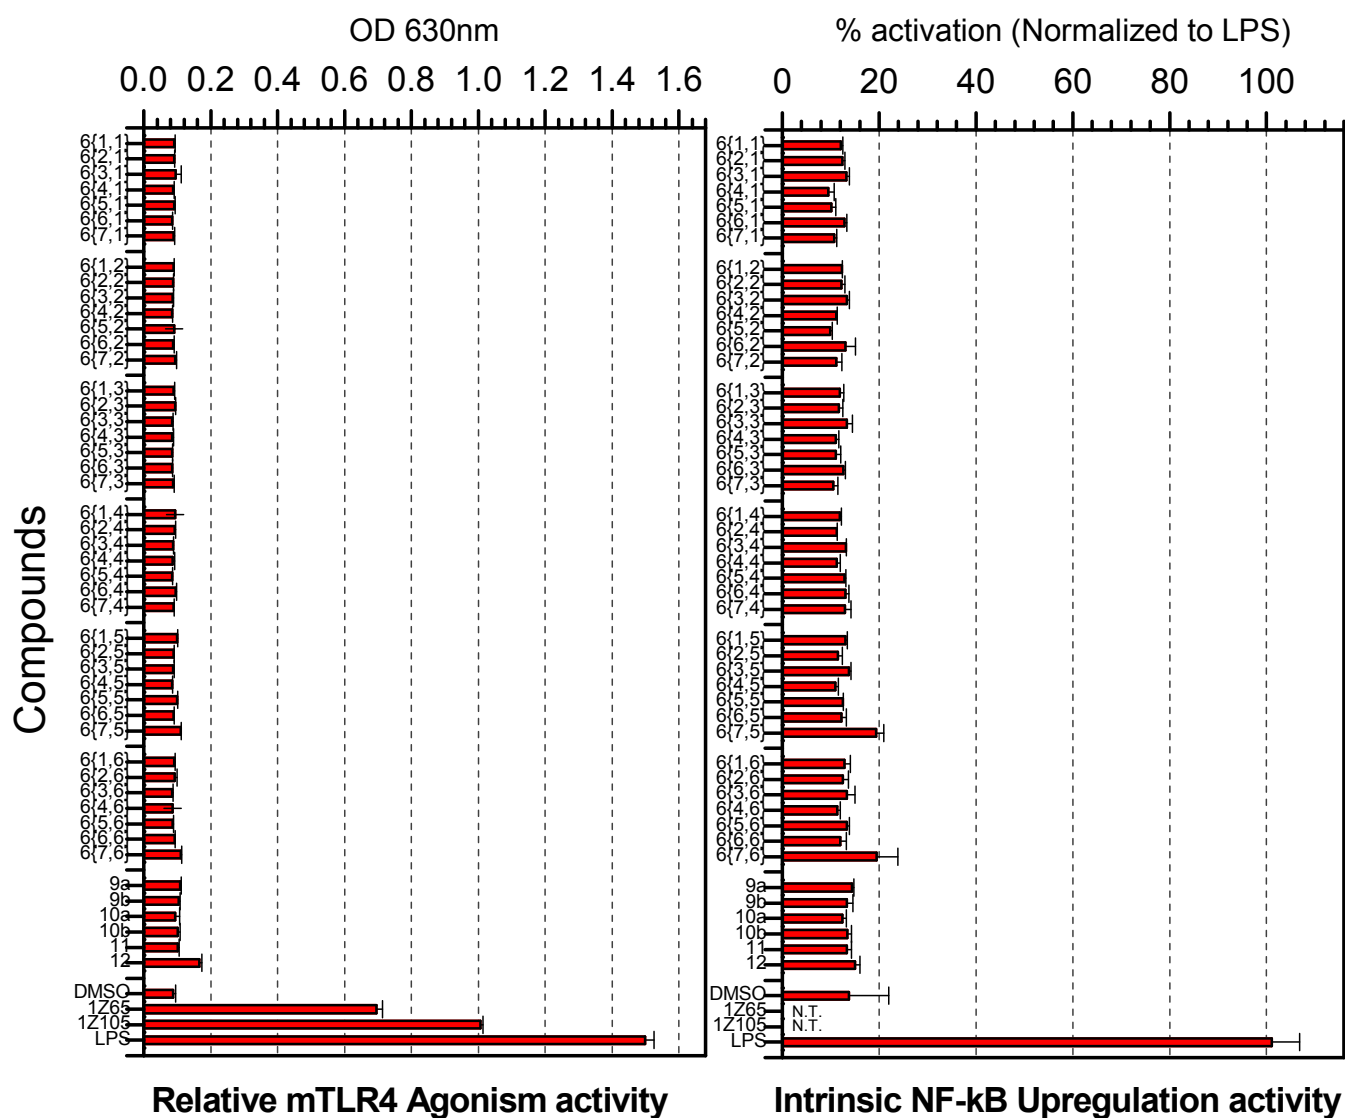

<sup>a</sup> Left: Relative murine TLR4 agonistic activity of compounds at 5  $\mu$ M were determined using HEK-TLR4 based SEAP assay. 1Z65 and 1Z105 (compounds **1** and **42**, respectively; reference 1) are pyrimidoindole class of TLR4 agonists.<sup>1</sup> Right: Intrinsic NF- $\kappa$ B inducing activity of compound alone at 5h in NF- $\kappa$ B FRET cells as percent activation normalized to LPS (10ng/mL) as 100%. The response ratio for LPS was  $8.61 \pm 1.7$ . N.T. is not tested.

## Supporting Information Figure S3

### Compound collection library used for HTS <sup>a</sup>

|                                                                     | Vendor                    | #384 plate      | # compounds    |
|---------------------------------------------------------------------|---------------------------|-----------------|----------------|
| <b>Diversity Collection</b>                                         | ChemBridge                | 74              | 23,370         |
|                                                                     | ChemDiv                   | 157             | 49,997         |
|                                                                     | SPECS                     | 95              | 30,106         |
|                                                                     | ChemBridge Premium        | 95              | 29,998         |
|                                                                     | Celera_ChemRx             | 9               | 2,767          |
|                                                                     | <b>Subtotal</b>           |                 | <b>136,238</b> |
| <b>Kinase Targeted Collection</b>                                   | ChemDiv                   | 32              | 9,993          |
|                                                                     | I.F. Labs                 | 40              | 12,696         |
|                                                                     | Celera_AR5                | 4               | 1,236          |
|                                                                     | Celera_Asinex             | 2               | 369            |
|                                                                     |                           | <b>Subtotal</b> |                |
| <b>Known Bioactive Collection</b>                                   | Microsource               | 6               | 1,898          |
|                                                                     | Iconix                    | 1               | 200            |
|                                                                     |                           | <b>Subtotal</b> | <b>2,098</b>   |
| <b>Drug</b>                                                         | FDA Supplemental Purchase | 1               | 270            |
|                                                                     | Pharmakon                 | 5               | 1,591          |
|                                                                     |                           | <b>Subtotal</b> | <b>1,861</b>   |
| <b>Protease library</b><br>(Cysteine protease, Deubiquitinase, MMP) | Celera                    | 6               | 1,813          |
|                                                                     |                           | <b>Subtotal</b> | <b>1,813</b>   |
| <b>Total</b>                                                        |                           | <b>527</b>      | <b>166,304</b> |

<sup>a</sup> Collection of compounds used for HTS were obtained from a variety of libraries including diversity collection and kinase as well as protease libraries.

**Supporting Information Table S1**  
**Data from 5h and 12h NF-κB FRET assay and THP-1 MTT Assay <sup>a</sup>**

| Compound #    | 5h NF-κB Induction with LPS |      | 20h NF-κB Induction with LPS |      | THP-1 MTT Relative Viability |      |
|---------------|-----------------------------|------|------------------------------|------|------------------------------|------|
|               | Mean (% act)                | SD   | Mean(% act)                  | SD   | Mean (% viability)           | SD   |
| LPS (10ng/mL) | 100.0                       | 6.0  | 100.0                        | 8.1  | 97.8                         | 7.0  |
| DMSO (0.5%)   | 13.2                        | 2.1  | 39.8                         | 7.8  | 100.0                        | 5.9  |
| <b>6{1,1}</b> | 103.3                       | 4.9  | 110.6                        | 13.2 | 96.6                         | 5.5  |
| <b>6{2,1}</b> | 98.4                        | 4.2  | 122.2                        | 8.8  | 95.3                         | 4.5  |
| <b>6{3,1}</b> | 101.3                       | 6.3  | 102.0                        | 7.9  | 95.8                         | 8.9  |
| <b>6{4,1}</b> | 104.8                       | 4.8  | 114.8                        | 10.0 | 105.9                        | 5.3  |
| <b>6{5,1}</b> | 97.3                        | 3.5  | 94.8                         | 9.6  | 98.7                         | 5.7  |
| <b>6{6,1}</b> | 93.8                        | 4.8  | 103.3                        | 7.1  | 96.4                         | 4.8  |
| <b>6{7,1}</b> | 97.9                        | 1.9  | 121.4                        | 14.5 | 103.6                        | 3.7  |
| <b>6{1,2}</b> | 104.0                       | 7.1  | 116.7                        | 8.4  | 95.2                         | 5.9  |
| <b>6{2,2}</b> | 102.6                       | 3.1  | 117.7                        | 7.6  | 96.3                         | 4.0  |
| <b>6{3,2}</b> | 104.3                       | 3.2  | 103.1                        | 7.7  | 97.7                         | 5.2  |
| <b>6{4,2}</b> | 102.7                       | 4.4  | 97.0                         | 9.3  | 99.4                         | 3.8  |
| <b>6{5,2}</b> | 102.3                       | 3.5  | 114.4                        | 12.2 | 98.0                         | 6.3  |
| <b>6{6,2}</b> | 94.5                        | 5.8  | 110.3                        | 13.1 | 95.8                         | 6.1  |
| <b>6{7,2}</b> | 92.7                        | 4.4  | 107.7                        | 6.3  | 100.5                        | 5.6  |
| <b>6{1,3}</b> | 104.9                       | 5.4  | 112.4                        | 3.1  | 101.2                        | 7.2  |
| <b>6{2,3}</b> | 104.8                       | 3.2  | 110.0                        | 10.9 | 105.2                        | 4.8  |
| <b>6{3,3}</b> | 111.6                       | 12.3 | 101.5                        | 10.7 | 97.0                         | 3.7  |
| <b>6{4,3}</b> | 100.6                       | 5.6  | 98.5                         | 11.8 | 89.0                         | 13.7 |
| <b>6{5,3}</b> | 105.6                       | 5.8  | 101.9                        | 10.2 | 102.4                        | 6.1  |
| <b>6{6,3}</b> | 96.7                        | 3.9  | 107.9                        | 5.7  | 98.2                         | 7.1  |
| <b>6{7,3}</b> | 100.9                       | 2.3  | 111.0                        | 12.8 | 94.9                         | 5.4  |
| <b>6{1,4}</b> | 100.4                       | 6.7  | 108.0                        | 12.9 | 73.8                         | 4.7  |
| <b>6{2,4}</b> | 109.2                       | 15.2 | 137.1                        | 8.2  | 79.2                         | 5.3  |
| <b>6{3,4}</b> | 102.7                       | 4.5  | 112.7                        | 10.9 | 69.4                         | 4.6  |
| <b>6{4,4}</b> | 98.6                        | 2.9  | 107.3                        | 10.6 | 77.4                         | 3.7  |
| <b>6{5,4}</b> | 100.5                       | 3.6  | 114.0                        | 7.2  | 73.8                         | 2.6  |
| <b>6{6,4}</b> | 95.0                        | 8.5  | 121.2                        | 7.9  | 78.2                         | 4.8  |
| <b>6{7,4}</b> | 100.0                       | 5.7  | 120.5                        | 8.9  | 75.1                         | 5.2  |
| <b>6{1,5}</b> | 94.2                        | 6.8  | 130.7                        | 15.5 | 99.8                         | 1.5  |
| <b>6{2,5}</b> | 98.6                        | 5.9  | 107.1                        | 9.5  | 103.0                        | 4.7  |
| <b>6{3,5}</b> | 89.2                        | 4.0  | 73.5                         | 6.4  | 101.6                        | 3.6  |
| <b>6{4,5}</b> | 97.1                        | 9.1  | 97.5                         | 11.7 | 74.3                         | 4.7  |
| <b>6{5,5}</b> | 97.4                        | 7.2  | 117.4                        | 9.4  | 79.4                         | 4.6  |
| <b>6{6,5}</b> | 98.0                        | 11.3 | 115.0                        | 11.8 | 97.8                         | 3.3  |
| <b>6{7,5}</b> | 102.3                       | 6.0  | 176.0                        | 19.1 | 88.1                         | 6.5  |
| <b>6{1,6}</b> | 91.9                        | 6.9  | 152.0                        | 14.7 | 84.5                         | 2.4  |
| <b>6{2,6}</b> | 98.0                        | 5.9  | 138.0                        | 14.9 | 97.7                         | 6.7  |
| <b>6{3,6}</b> | 87.5                        | 7.1  | 83.1                         | 8.0  | 103.2                        | 3.8  |
| <b>6{4,6}</b> | 90.5                        | 3.5  | 115.2                        | 1.3  | 70.7                         | 2.4  |
| <b>6{5,6}</b> | 93.4                        | 5.3  | 171.1                        | 9.7  | 76.6                         | 4.1  |
| <b>6{6,6}</b> | 106.2                       | 9.6  | 190.0                        | 4.9  | 97.6                         | 5.6  |
| <b>6{7,6}</b> | 109.4                       | 10.3 | 190.8                        | 17.3 | 79.9                         | 5.3  |
| <b>9a</b>     | 102.6                       | 6.8  | 153.7                        | 17.4 | 87.2                         | 5.1  |
| <b>9b</b>     | 99.9                        | 3.7  | 143.3                        | 13.3 | 85.4                         | 4.4  |
| <b>10a</b>    | 96.3                        | 6.2  | 138.6                        | 6.9  | 87.4                         | 3.7  |
| <b>10b</b>    | 91.0                        | 2.4  | 142.0                        | 11.0 | 76.4                         | 3.3  |
| <b>11</b>     | 98.9                        | 8.6  | 94.0                         | 8.7  | 63.8                         | 2.4  |
| <b>12</b>     | 96.7                        | 6.4  | 91.4                         | 11.6 | 61.5                         | 2.4  |

<sup>a</sup> The %act values in NF-κB induction assay was normalized to LPS (10ng/mL) as 100%. The mean response ratio for LPS was 8.00±1.2 and 2.57±0.5 at 5h and 20h respectively. The %viability values in MTT assay was normalized to DMSO as 100%. The mean OD value for DMSO was 0.92±0.1. All raw values used for normalization are represented as mean±SD.

# References

1. Chan, M.; Hayashi, T.; Mathewson, R. D.; Nour, A.; Hayashi, Y.; Yao, S.; Tawatao, R. I.; Crain, B.; Tsigelny, I. F.; Kouznetsova, V. L.; Messer, K.; Pu, M.; Corr, M.; Carson, D. A.; Cottam, H. B., Identification of Substituted Pyrimido[5,4-*b*]indoles as Selective Toll-Like Receptor 4 Ligands. *J. Med. Chem.* **2013**, *56* (11), 4206-4223.

## Syntheses of Compounds 5{4-6}

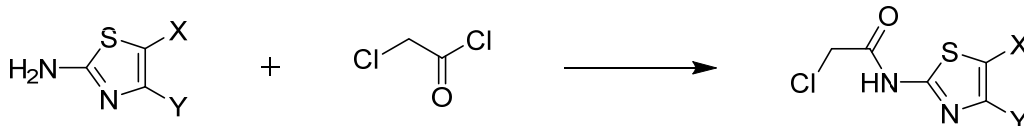

2-aminothiazole,

X, Y = H

2-aminobenzothiazole,

X-Y = -CH=CH-CH=CH-

2-amino-6-methylbenzothiazole,

X-Y = -CH=C(CH<sub>3</sub>)-CH=CH-

5{4}, X, Y = H

5{5}, X-Y = -CH=CH-CH=CH-

5{6}, X-Y = -CH=C(CH<sub>3</sub>)-CH=CH-

**General procedure for the synthesis of Compound 5{4-6}.** To a solution of 2-aminothiazole (for compound 5{4}) or 2-aminobenzothiazole (for compound 5{5}) or 2-amino-6-methylbenzothiazole (for compound 5{6}) (1 eq.) in toluene was added chloroacetyl chloride (1.5 eq.). The reaction mixture was heated at 70 °C for 9h and the precipitated were filtered and washed with excess toluene to obtain compound 5{4-6}.

5{4}; 2-chloro-N-(thiazol-2-yl)acetamide (yield = 74%): MS (ESI-TOF) for C<sub>5</sub>H<sub>5</sub>ClN<sub>2</sub>OS[M + H]<sup>+</sup> calculated 177.0, found 176.9.

5{5}; N-(benzo[d]thiazol-2-yl)-2-chloroacetamide (yield = 80%): MS (ESI-TOF) for C<sub>9</sub>H<sub>7</sub>ClN<sub>2</sub>OS[M + H]<sup>+</sup> calculated 227.0, found 226.9.

5{6}; 2-chloro-N-(6-methylbenzo[d]thiazol-2-yl)acetamide (yield = 88%): MS (ESI-TOF) for C<sub>10</sub>H<sub>9</sub>ClN<sub>2</sub>OS[M + H]<sup>+</sup> calculated 241.0, found 240.9.

**Experimental Section:** Compound names, reaction yields,  $^1\text{H}$  NMR and MS characterization data for all the final compounds,  $^{13}\text{C}$  NMR and HRMS characterization data for key compounds.

**6{1,1}; methyl 2-((3-(4-fluorophenyl)-4-oxo-4,5-dihydro-3H-pyrimido[5,4-*b*]indol-2-yl)thio)acetamide** (yield = 68%):  $^1\text{H}$  NMR (400 MHz, DMSO- $d_6$ )  $\delta$  12.15 (s, 1H), 7.91 (d,  $J$  = 7.81 Hz, 1H), 7.56 (d,  $J$  = 4.88 Hz, 1H), 7.59 (d,  $J$  = 4.88 Hz, 1H), 7.42 - 7.55 (m, 4H), 7.26 (t,  $J$  = 7.32 Hz, 1H), 4.04 (s, 2H), 3.71 (s, 3H). MS (ESI-TOF) for  $\text{C}_{19}\text{H}_{14}\text{FN}_3\text{O}_3\text{S}[\text{M} + \text{H}]^+$  calculated 384.1, found 384.0.

**6{2,1}; methyl 2-((3-(4-methoxyphenyl)-4-oxo-4,5-dihydro-3H-pyrimido[5,4-*b*]indol-2-yl)thio)acetamide** (yield = 58%):  $^1\text{H}$  NMR (400 MHz, DMSO- $d_6$ )  $\delta$  12.11 (s, 1H), 7.90 (d,  $J$  = 7.81 Hz, 1H), 7.46 (d,  $J$  = 8.29 Hz, 1H), 7.51 (t,  $J$  = 8.30 Hz, 1H), 7.38 (d,  $J$  = 8.78 Hz, 2H), 7.25 (t,  $J$  = 7.32 Hz, 1H), 7.14 (d,  $J$  = 8.78 Hz, 2H), 4.01 (s, 2H), 3.86 (s, 3H), 3.71 (s, 3H). MS (ESI-TOF) for  $\text{C}_{20}\text{H}_{17}\text{N}_3\text{O}_4\text{S}[\text{M} - \text{H}]^-$  calculated 394.1, found 393.9.

**6{3,1}; methyl 2-((3-isopropyl-4-oxo-4,5-dihydro-3H-pyrimido[5,4-*b*]indol-2-yl)thio)acetamide** (yield = 18%):  $^1\text{H}$  NMR (400 MHz, DMSO- $d_6$ )  $\delta$  11.91 (s, 1H), 7.83 (d,  $J$  = 7.81 Hz, 1H), 7.49 (d,  $J$  = 8.29 Hz, 1H), 7.44 (t,  $J$  = 7.32 Hz, 1H), 7.22 (t,  $J$  = 7.32 Hz, 1H), 4.51 - 4.79 (m, 1H), 4.14 (s, 2H), 3.72 (s, 3H), 1.65 (d,  $J$  = 6.34 Hz, 6H). MS (ESI-TOF) for  $\text{C}_{16}\text{H}_{17}\text{N}_3\text{O}_3\text{S}[\text{M} - \text{H}]^-$  calculated 330.1, found 330.0.

**6{4,1}; methyl 2-((3-methyl-4-oxo-4,5-dihydro-3H-pyrimido[5,4-*b*]indol-2-yl)thio)acetamide** (yield = 64%):  $^1\text{H}$  NMR (400 MHz, DMSO- $d_6$ )  $\delta$  12.01 (s, 1H), 7.86 (d,  $J$  = 7.81 Hz, 1H), 7.45 (t,  $J$  = 7.30 Hz, 1H), 7.50 (d,  $J$  = 8.29 Hz, 1H), 7.22 (t,  $J$  = 7.32 Hz, 1H), 4.19 (s, 2H), 3.71 (s, 3H), 3.62 (s, 3H). MS (ESI-TOF) for  $\text{C}_{14}\text{H}_{13}\text{N}_3\text{O}_3\text{S}[\text{M} + \text{H}]^+$  calculated 304.1, found 304.0.



**6{5,1}; methyl 2-((3-ethyl-4-oxo-4,5-dihydro-3H-pyrimido[5,4-b]indol-2-yl)thio)acetamide**

(yield = 41%): <sup>1</sup>H NMR (400 MHz, DMSO-d<sub>6</sub>) δ 12.01 (s, 1H), 7.85 (d, *J* = 7.81 Hz, 1H), 7.44 (d, *J* = 7.80 Hz, 1H), 7.49 (t, *J* = 8.30 Hz, 2H), 7.23 (t, *J* = 7.32 Hz, 1H), 4.08 - 4.28 (m, 2H), 4.20 (q, *J* = 6.80 Hz, 1H), 3.72 (s, 3H), 1.33 (t, *J* = 7.07 Hz, 3H). MS (ESI-TOF) for C<sub>15</sub>H<sub>15</sub>N<sub>3</sub>O<sub>3</sub>S[M + H]<sup>+</sup> calculated 318.1, found 318.0.

**6{6,1}; methyl 2-((4-oxo-3-propyl-4,5-dihydro-3H-pyrimido[5,4-b]indol-2-yl)thio)acetamide**

(yield = 39%): <sup>1</sup>H NMR (400 MHz, DMSO-d<sub>6</sub>) δ 12.00 (s, 1H), 7.84 (d, *J* = 7.81 Hz, 1H), 7.48 (t, *J* = 8.30 Hz, 1H), 7.43 (d, *J* = 7.81 Hz, 1H), 7.22 (t, *J* = 7.56 Hz, 1H), 4.18 (s, 2H), 4.04 - 4.14 (m, 2H), 3.70 (s, 3H), 1.76 (sxt, *J* = 7.80 Hz, 2H), 0.97 (t, *J* = 7.32 Hz, 3H). MS (ESI-TOF) for C<sub>16</sub>H<sub>17</sub>N<sub>3</sub>O<sub>3</sub>S[M + H]<sup>+</sup> calculated 332.1, found 332.0.

**6{7,1}; methyl 2-((3-butyl-4-oxo-4,5-dihydro-3H-pyrimido[5,4-b]indol-2-yl)thio)acetamide**

(yield = 82%): <sup>1</sup>H NMR (400 MHz, DMSO-d<sub>6</sub>) δ 12.00 (s, 1H), 7.85 (d, *J* = 7.81 Hz, 1H), 7.49 (t, *J* = 8.30 Hz, 1H), 7.44 (d, *J* = 8.29 Hz, 1H), 7.23 (t, *J* = 7.30 Hz, 1H), 4.19 (s, 2H), 4.14 (t, *J* = 7.80 Hz, 2H), 3.72 (s, 3H), 1.73 (quin, *J* = 7.30 Hz, 2H), 1.42 (sxt, *J* = 7.80 Hz, 2H), 0.96 (t, *J* = 7.32 Hz, 3H). MS (ESI-TOF) for C<sub>17</sub>H<sub>19</sub>N<sub>3</sub>O<sub>3</sub>S[M - H]<sup>-</sup> calculated 344.1, found 344.0

**6{1,2}; ethyl 2-((3-(4-fluorophenyl)-4-oxo-4,5-dihydro-3H-pyrimido[5,4-b]indol-2-**

**yl)thio)acetamide** (yield = 66%): <sup>1</sup>H NMR (400 MHz, DMSO-d<sub>6</sub>) δ 12.15 (s, 1H), 7.91 (d, *J* = 8.29 Hz, 1H), 7.42 - 7.61 (m, 6H), 7.25 (t, *J* = 7.56 Hz, 1H), 4.15 (q, *J* = 6.83 Hz, 2H), 4.03 (s, 2H), 1.23 (t, *J* = 7.07 Hz, 3H). MS (ESI-TOF) for C<sub>20</sub>H<sub>16</sub>FN<sub>3</sub>O<sub>3</sub>S[M - H]<sup>-</sup> calculated 396.1, found 395.8.

**6{2,2}; ethyl 2-((3-(4-methoxyphenyl)-4-oxo-4,5-dihydro-3H-pyrimido[5,4-b]indol-2-**

**yl)thio)acetamide** (yield = 51%): <sup>1</sup>H NMR (400 MHz, DMSO-d<sub>6</sub>) δ 12.12 (s, 1H), 7.91 (d, *J* = 7.81 Hz, 1H), 7.47 (t, *J* = 7.60 Hz, 1H), 7.52 (d, *J* = 8.30 Hz, 1H), 7.38 (d, *J* = 7.81 Hz, 2H), 7.25

(t,  $J = 6.80$  Hz, 1H), 7.14 (d,  $J = 8.29$  Hz, 2H), 4.15 (q,  $J = 6.83$  Hz, 2H), 4.00 (s, 2H), 3.87 (s, 3H), 1.22 (t,  $J = 6.83$  Hz, 3H). MS (ESI-TOF) for  $C_{21}H_{19}N_3O_4S[M - H]^-$  calculated 408.1, found 408.0.

**6{3,2}; ethyl 2-((3-isopropyl-4-oxo-4,5-dihydro-3H-pyrimido[5,4-*b*]indol-2-**

**yl)thio)acetamide** (yield = 41%):  $^1H$  NMR (400 MHz, DMSO- $d_6$ )  $\delta$  11.91 (s, 1H), 7.83 (d,  $J = 7.80$  Hz, 1H), 7.43 (t,  $J = 7.60$  Hz, 1H), 7.49 (d,  $J = 8.30$  Hz, 1H), 7.21 (t,  $J = 7.56$  Hz, 1H), 4.52 - 4.78 (m, 1H), 4.13 (s, 2H), 4.14 (q,  $J = 7.30$  Hz, 2H), 1.65 (d,  $J = 6.83$  Hz, 6H), 1.21 (t,  $J = 7.07$  Hz, 3H). MS (ESI-TOF) for  $C_{17}H_{19}N_3O_3S[M + H]^+$  calculated 346.1, found 346.0.

**6{4,2}; ethyl 2-((3-methyl-4-oxo-4,5-dihydro-3H-pyrimido[5,4-*b*]indol-2-yl)thio)acetamide**

(yield = 54%):  $^1H$  NMR (400 MHz, DMSO- $d_6$ )  $\delta$  12.00 (s, 1H), 7.84 (d,  $J = 7.81$  Hz, 1H), 7.46 (t,  $J = 8.30$  Hz, 1H), 7.42 (d,  $J = 8.30$  Hz, 1H), 7.20 (t,  $J = 7.60$  Hz, 1H), 4.15 (s, 2H), 4.14 (q,  $J = 7.10$  Hz, 2H), 3.59 (s, 3H), 1.20 (t,  $J = 7.07$  Hz, 3H). MS (ESI-TOF) for  $C_{15}H_{15}N_3O_3S[M + H]^+$  calculated 318.1, found 318.0.

**6{5,2}; ethyl 2-((3-ethyl-4-oxo-4,5-dihydro-3H-pyrimido[5,4-*b*]indol-2-yl)thio)acetamide**

(yield = 42%):  $^1H$  NMR (400 MHz, DMSO- $d_6$ )  $\delta$  11.99 (br. s., 1H), 7.84 (d,  $J = 7.32$  Hz, 1H), 7.43 (t,  $J = 7.30$  Hz, 1H), 7.48 (d,  $J = 8.29$  Hz, 1H), 7.20 (t,  $J = 6.80$  Hz, 1H), 4.00 - 4.22 (m, 6H), 1.31 (t,  $J = 7.30$  Hz, 3H), 1.18 (t,  $J = 6.80$  Hz, 3H). MS (ESI-TOF) for  $C_{16}H_{17}N_3O_3S[M + H]^+$  calculated 332.1, found 332.0.

**6{6,2}; ethyl 2-((4-oxo-3-propyl-4,5-dihydro-3H-pyrimido[5,4-*b*]indol-2-yl)thio)acetamide**

(yield = 48%):  $^1H$  NMR (400 MHz, DMSO- $d_6$ )  $\delta$  12.01 (br. s., 1H), 7.85 (d,  $J = 8.29$  Hz, 1H), 7.50 (d,  $J = 8.30$  Hz, 1H), 7.44 (t,  $J = 7.80$  Hz, 1H), 7.22 (t,  $J = 7.07$  Hz, 1H), 4.03 - 4.21 (m, 6H), 1.76 (q,  $J = 7.30$  Hz, 2H), 1.19 (t,  $J = 7.07$  Hz, 3H), 0.97 (t,  $J = 7.56$  Hz, 3H). MS (ESI-TOF) for  $C_{17}H_{19}N_3O_3S[M + H]^+$  calculated 346.1, found 346.0.

**6{7,2}; ethyl 2-((3-butyl-4-oxo-4,5-dihydro-3H-pyrimido[5,4-b]indol-2-yl)thio)acetamide**

(yield = 49%): <sup>1</sup>H NMR (400 MHz, DMSO-d<sub>6</sub>) δ 12.00 (s, 1H), 7.85 (d, *J* = 8.29 Hz, 1H), 7.49 (d, *J* = 8.30 Hz, 1H), 7.44 (t, *J* = 8.30 Hz, 1H), 7.22 (t, *J* = 7.56 Hz, 1H), 4.06 - 4.23 (m, 6H), 1.72 (quin, *J* = 7.56 Hz, 2H), 1.41 (sxt, *J* = 7.41 Hz, 2H), 1.20 (t, *J* = 7.07 Hz, 3H), 0.96 (t, *J* = 7.31 Hz, 3H). MS (ESI-TOF) for C<sub>16</sub>H<sub>21</sub>N<sub>3</sub>O<sub>3</sub>S[M + H]<sup>+</sup> calculated 360.1, found 360.1.

**6{1,3}; tert-butyl 2-((3-(4-<sup>1</sup>H NMR (400 MHz, DMSO-d<sub>6</sub>) δ 12.15 (s, 1H), 7.95 (d, *J* = 8.29 Hz, 1H), 7.41 - 7.60 (m, 6H), 7.26 (t, *J* = 7.32 Hz, 1H), 3.92 (s, 2H), 1.40 (s, 9H). MS (ESI-TOF) for C<sub>22</sub>H<sub>20</sub>FN<sub>3</sub>O<sub>3</sub>S[M + H]<sup>+</sup> calculated 426.1, found 426.0.**

**6{2,3}; tert-butyl 2-((3-(4-methoxyphenyl)-4-oxo-4,5-dihydro-3H-pyrimido[5,4-b]indol-2-yl)thio)acetamide** (yield = 34%): <sup>1</sup>H NMR (400 MHz, DMSO-d<sub>6</sub>) δ 12.11 (s, 1H), 7.95 (d, *J* = 7.81 Hz, 1H), 7.51 (d, *J* = 8.29 Hz, 1H), 7.46 (t, *J* = 7.30 Hz, 1H), 7.37 (d, *J* = 8.29 Hz, 2H), 7.25 (t, *J* = 7.07 Hz, 1H), 7.14 (d, *J* = 8.78 Hz, 2H), 3.90 (s, 2H), 3.86 (s, 3H), 1.40 (s, 9H). MS (ESI-TOF) for C<sub>23</sub>H<sub>23</sub>N<sub>3</sub>O<sub>4</sub>S[M - H]<sup>-</sup> calculated 436.1, found 436.0.

**6{3,3}; tert-butyl 2-((3-isopropyl-4-oxo-4,5-dihydro-3H-pyrimido[5,4-b]indol-2-yl)thio)acetamide** (yield = 33%): <sup>1</sup>H NMR (400 MHz, DMSO-d<sub>6</sub>) δ 11.90 (br. s., 1H), 7.89 (d, *J* = 7.81 Hz, 1H), 7.49 (d, *J* = 8.29 Hz, 1H), 7.43 (t, *J* = 7.80 Hz, 1H), 7.22 (t, *J* = 7.32 Hz, 1H), 4.57 - 4.75 (m, 1H), 4.04 (s, 2H), 1.65 (d, *J* = 6.34 Hz, 6H), 1.37 (s, 9H). MS (ESI-TOF) for C<sub>19</sub>H<sub>23</sub>N<sub>3</sub>O<sub>3</sub>S[M - H]<sup>-</sup> calculated 372.1, found 372.1.

**6{4,3}; tert-butyl 2-((3-methyl-4-oxo-4,5-dihydro-3H-pyrimido[5,4-b]indol-2-yl)thio)acetamide** (yield = 52%): <sup>1</sup>H NMR (400 MHz, DMSO-d<sub>6</sub>) δ 12.01 (br. s., 1H), 7.92 (d, *J* = 7.81 Hz, 1H), 7.49 (d, *J* = 8.30 Hz, 1H), 7.44 (t, *J* = 7.80 Hz, 1H), 7.22 (t, *J* = 7.32 Hz, 1H), 4.08 (s, 2H), 3.61 (s, 3H), 1.41 (s, 9H). MS (ESI-TOF) for C<sub>17</sub>H<sub>19</sub>N<sub>3</sub>O<sub>3</sub>S[M + H]<sup>+</sup> calculated 346.1, found 346.0.

**6{5,3}; tert-butyl 2-((3-ethyl-4-oxo-4,5-dihydro-3H-pyrimido[5,4-b]indol-2-**

**yl)thio)acetamide** (yield = 70%): <sup>1</sup>H NMR (400 MHz, DMSO-d<sub>6</sub>) δ 12.01 (s, 1H), 7.91 (d, *J* = 8.05 Hz, 1H), 7.49 (d, *J* = 8.54 Hz, 1H), 7.44 (t, *J* = 7.80 Hz, 1H), 7.22 (t, *J* = 7.44 Hz, 1H), 4.20 (q, *J* = 6.83 Hz, 2H), 4.08 (s, 2H), 1.38 (s, 9H), 1.33 (t, *J* = 7.07 Hz, 3H). MS (ESI-TOF) for C<sub>18</sub>H<sub>21</sub>N<sub>3</sub>O<sub>3</sub>S[M - H]<sup>-</sup> calculated 358.1, found 358.1.

**6{6,3}; tert-butyl 2-((4-oxo-3-propyl-4,5-dihydro-3H-pyrimido[5,4-b]indol-2-**

**yl)thio)acetamide** (yield = 52%): <sup>1</sup>H NMR (400 MHz, DMSO-d<sub>6</sub>) δ 12.01 (s, 1H), 7.91 (d, *J* = 7.81 Hz, 1H), 7.49 (d, *J* = 8.29 Hz, 1H), 7.44 (t, *J* = 7.80 Hz, 1H), 7.22 (t, *J* = 7.32 Hz, 1H), 4.07 (s, 2H), 4.10 (t, *J* = 7.80 Hz, 2H), 1.77 (sxt, *J* = 7.30 Hz, 2H), 1.37 (s, 9H), 0.97 (t, *J* = 7.32 Hz, 3H). MS (ESI-TOF) for C<sub>19</sub>H<sub>23</sub>N<sub>3</sub>O<sub>3</sub>S[M - H]<sup>-</sup> calculated 372.1, found 372.0.

**6{7,3}; tert-butyl 2-((3-butyl-4-oxo-4,5-dihydro-3H-pyrimido[5,4-b]indol-2-**

**yl)thio)acetamide** (yield = 70%): <sup>1</sup>H NMR (400 MHz, DMSO-d<sub>6</sub>) δ 12.00 (s, 1H), 7.90 (d, *J* = 8.29 Hz, 1H), 7.50 (d, *J* = 8.29 Hz, 1H), 7.44 (t, *J* = 7.80 Hz, 1H), 7.22 (t, *J* = 7.32 Hz, 1H), 4.14 (t, *J* = 7.80 Hz, 2H), 4.07 (s, 2H), 1.73 (quin, *J* = 7.70 Hz, 2H), 1.30 - 1.48 (m, 11H), 0.95 (t, *J* = 7.32 Hz, 3H). MS (ESI-TOF) for C<sub>20</sub>H<sub>25</sub>N<sub>3</sub>O<sub>3</sub>S[M - H]<sup>-</sup> calculated 386.2, found 386.1.

**6{1,4}; 2-((3-(4-fluorophenyl)-4-oxo-4,5-dihydro-3H-pyrimido[5,4-b]indol-2-yl)thio)-N-**

**(thiazol-2-yl)-acetamide** (yield = 44%): <sup>1</sup>H NMR (400 MHz, DMSO-d<sub>6</sub>) δ 12.56 (s, 1H), 12.08 (s, 1H), 7.80 (d, *J* = 8.29 Hz, 1H), 7.54 - 7.63 (m, 2H), 7.51 (d, *J* = 3.42 Hz, 1H), 7.35 - 7.48 (m, 4H), 7.16 (d, *J* = 3.42 Hz, 1H), 7.08 (t, *J* = 7.56 Hz, 1H), 4.16 (s, 2H). MS (ESI-TOF) for C<sub>21</sub>H<sub>14</sub>FN<sub>5</sub>O<sub>2</sub>S<sub>2</sub>[M - H]<sup>-</sup> calculated 450.1, found 449.9.

**6{2,4}; 2-((3-(4-methoxyphenyl)-4-oxo-4,5-dihydro-3H-pyrimido[5,4-b]indol-2-yl)thio)-N-**

**(thiazol-2-yl)-acetamide** (yield = 66%): <sup>1</sup>H NMR (400 MHz, DMSO-d<sub>6</sub>) δ 12.57 (s, 1H), 12.07 (s, 1H), 7.81 (d, *J* = 7.81 Hz, 1H), 7.50 - 7.56 (m, 1H), 7.47 (d, *J* = 8.29 Hz, 1H), 7.36 - 7.43 (m,

3H), 7.05 - 7.21 (m, 3H), 7.09 (t,  $J = 7.40$  Hz, 1H), 4.15 (s, 2H), 3.87 (s, 3H). MS (ESI-TOF) for  $C_{22}H_{17}N_3O_3S[M - H]^-$  calculated 462.1, found 462.0.

**6{3,4}; 2-((3-isopropyl-4-oxo-4,5-dihydro-3H-pyrimido[5,4-*b*]indol-2-yl)thio)-*N*-(thiazol-2-yl)-acetamide** (yield = 68%):  $^1H$  NMR (400 MHz, DMSO- $d_6$ )  $\delta$  12.64 (br. s., 1H), 11.86 (br. s., 1H), 7.73 (d,  $J = 7.81$  Hz, 1H), 7.53 (br. s., 1H), 7.43 (d,  $J = 7.81$  Hz, 1H), 7.36 (t,  $J = 7.30$  Hz, 1H), 7.17 (br. s., 1H), 7.02 (t,  $J = 7.32$  Hz, 1H), 4.57 - 4.74 (m, 1H), 4.28 (s, 2H), 1.66 (d,  $J = 6.34$  Hz, 6H). MS (ESI-TOF) for  $C_{18}H_{17}N_5O_2S_2[M + H]^+$  calculated 400.1, found 400.0.

**6{4,4}; 2-((3-methyl-4-oxo-4,5-dihydro-3H-pyrimido[5,4-*b*]indol-2-yl)thio)-*N*-(thiazol-2-yl)-acetamide** (yield = 64%):  $^1H$  NMR (400 MHz, DMSO- $d_6$ )  $\delta$  12.62 (s, 1H), 11.97 (s, 1H), 7.77 (d,  $J = 7.81$  Hz, 1H), 7.50 - 7.59 (m, 1H), 7.44 (d,  $J = 8.29$  Hz, 1H), 7.38 (t,  $J = 7.30$  Hz, 1H), 7.17 (d,  $J = 2.44$  Hz, 1H), 7.06 (t,  $J = 7.30$  Hz, 1H), 4.33 (s, 2H), 3.62 (s, 3H). MS (ESI-TOF) for  $C_{16}H_{13}N_5O_2S_2[M + H]^+$  calculated 372.1, found 371.9.

**6{5,4}; 2-((3-ethyl-4-oxo-4,5-dihydro-3H-pyrimido[5,4-*b*]indol-2-yl)thio)-*N*-(thiazol-2-yl)-acetamide** (yield = 81%):  $^1H$  NMR (400 MHz, DMSO- $d_6$ )  $\delta$  12.63 (br. s., 1H), 11.97 (br. s., 1H), 7.75 (d,  $J = 8.29$  Hz, 1H), 7.28 - 7.56 (m, 2H), 7.38 (t,  $J = 7.00$  Hz, 1H), 7.17 (br. s., 1H), 7.05 (t,  $J = 7.30$  Hz, 1H), 4.32 (s, 2H), 4.20 (q,  $J = 6.80$  Hz, 2H), 1.34 (t,  $J = 6.80$  Hz, 3H). MS (ESI-TOF) for  $C_{17}H_{15}N_5O_2S_2[M + H]^+$  calculated 386.1, found 385.9.

**6{6,4}; 2-((4-oxo-3-propyl-4,5-dihydro-3H-pyrimido[5,4-*b*]indol-2-yl)thio)-*N*-(thiazol-2-yl)-acetamide** (yield = 73%):  $^1H$  NMR (400 MHz, DMSO- $d_6$ )  $\delta$  12.63 (s, 1H), 11.97 (s, 1H), 7.76 (d,  $J = 8.29$  Hz, 1H), 7.53 (d,  $J = 3.90$  Hz, 1H), 7.44 (d,  $J = 8.29$  Hz, 1H), 7.38 (t,  $J = 7.60$  Hz, 1H), 7.17 (d,  $J = 3.42$  Hz, 1H), 7.05 (t,  $J = 7.80$  Hz, 1H), 4.32 (s, 2H), 4.11 (t,  $J = 7.56$  Hz, 2H), 1.78 (sxt,  $J = 7.30$  Hz, 2H), 0.98 (t,  $J = 7.56$  Hz, 3H). MS (ESI-TOF) for  $C_{18}H_{17}N_5O_2S_2[M - H]^-$  calculated 398.1, found 397.9.

**6{7,4}; 2-((3-butyl-4-oxo-4,5-dihydro-3H-pyrimido[5,4-*b*]indol-2-yl)thio)-*N*-(thiazol-2-yl)-acetamide** (yield = 92%): <sup>1</sup>H NMR (400 MHz, DMSO-*d*<sub>6</sub>) δ 12.61 (s, 1H), 11.94 (s, 1H), 7.73 (d, *J* = 7.81 Hz, 1H), 7.51 (d, *J* = 2.93 Hz, 1H), 7.42 (d, *J* = 7.81 Hz, 1H), 7.36 (t, *J* = 7.80 Hz, 1H), 7.15 (d, *J* = 2.93 Hz, 1H), 7.03 (t, *J* = 7.30 Hz, 1H), 4.30 (s, 2H), 4.13 (t, *J* = 7.32 Hz, 2H), 1.72 (quin, *J* = 7.30 Hz, 2H), 1.40 (sxt, *J* = 7.30 Hz, 2H), 0.95 (t, *J* = 7.32 Hz, 3H). MS (ESI-TOF) for C<sub>19</sub>H<sub>19</sub>N<sub>5</sub>O<sub>2</sub>S<sub>2</sub> [M - H]<sup>-</sup> calculated 412.1, found 411.9.

**6{1,5}; *N*-(benzo[*d*]thiazol-2-yl)-2-((3-(4-fluorophenyl)-4-oxo-4,5-dihydro-3H-pyrimido[5,4-*b*]indol-2-yl)thio)acetamide** (yield = 67%): <sup>1</sup>H NMR (400 MHz, DMSO-*d*<sub>6</sub>) δ 12.86 (s, 1H), 12.10 (s, 1H), 7.92 (d, *J* = 7.81 Hz, 1H), 7.85 (t, *J* = 7.56 Hz, 2H), 7.58 - 7.66 (m, 2H), 7.40 - 7.53 (m, 4H), 7.35 (t, *J* = 7.30 Hz, 1H), 7.29 (t, *J* = 7.80 Hz, 1H), 6.97 (t, *J* = 7.56 Hz, 1H), 4.23 (s, 2H). MS (ESI-TOF) for C<sub>25</sub>H<sub>16</sub>FN<sub>5</sub>O<sub>2</sub>S<sub>2</sub> [M - H]<sup>-</sup> calculated 500.1, found 499.9.

**6{2,5}; *N*-(benzo[*d*]thiazol-2-yl)-2-((3-(4-methoxyphenyl)-4-oxo-4,5-dihydro-3H-pyrimido[5,4-*b*]indol-2-yl)thio)acetamide** (yield = 64%): <sup>1</sup>H NMR (400 MHz, DMSO-*d*<sub>6</sub>) δ 12.85 (s, 1H), 12.07 (s, 1H), 7.92 (d, *J* = 7.81 Hz, 1H), 7.85 (t, *J* = 6.59 Hz, 2H), 7.39 - 7.52 (m, 4H), 7.34 (t, *J* = 7.30 Hz, 1H), 7.29 (t, *J* = 7.30 Hz, 1H), 7.15 (d, *J* = 8.78 Hz, 2H), 6.97 (t, *J* = 7.56 Hz, 1H), 4.21 (s, 2H), 3.87 (s, 3H). MS (ESI-TOF) for C<sub>26</sub>H<sub>19</sub>N<sub>5</sub>O<sub>3</sub>S<sub>2</sub> [M - H]<sup>-</sup> calculated 512.1, found 512.0.

**6{3,5}; *N*-(benzo[*d*]thiazol-2-yl)-2-((3-isopropyl-4-oxo-4,5-dihydro-3H-pyrimido[5,4-*b*]indol-2-yl)thio)acetamide** (yield = 67%): <sup>1</sup>H NMR (400 MHz, DMSO-*d*<sub>6</sub>) δ 12.91 (s, 1H), 11.86 (br. s., 1H), 7.91 (d, *J* = 7.81 Hz, 1H), 7.85 (d, *J* = 7.81 Hz, 1H), 7.79 (d, *J* = 7.81 Hz, 1H), 7.46 (t, *J* = 7.56 Hz, 1H), 7.40 (d, *J* = 8.29 Hz, 1H), 7.24 - 7.34 (m, *J* = 6.80 Hz, 2H), 6.89 (t, *J* = 7.56 Hz, 1H), 4.59 - 4.75 (m, 1H), 4.34 (s, 2H), 1.67 (d, *J* = 6.83 Hz, 6H). MS (ESI-TOF) for C<sub>22</sub>H<sub>19</sub>N<sub>5</sub>O<sub>2</sub>S<sub>2</sub> [M + Na<sup>+</sup>] calculated 472.1, found 471.9.

**6{4,5}; N-(benzo[d]thiazol-2-yl)-2-((3-methyl-4-oxo-4,5-dihydro-3H-pyrimido[5,4-b]indol-2-yl)thio)acetamide** (yield = 55%):  $^1\text{H}$  NMR (400 MHz, DMSO- $d_6$ )  $\delta$  12.90 (s, 1H), 11.96 (s, 1H), 7.91 (d,  $J$  = 7.81 Hz, 1H), 7.84 (d,  $J$  = 8.10 Hz, 1H), 7.81 (d,  $J$  = 8.10 Hz, 1H), 7.45 (t,  $J$  = 7.81 Hz, 1H), 7.41 (d,  $J$  = 8.78 Hz, 1H), 7.32 (t,  $J$  = 7.30 Hz, 1H), 7.28 (t,  $J$  = 7.30 Hz, 1H), 6.92 (t,  $J$  = 7.56 Hz, 1H), 4.39 (s, 2H), 3.63 (s, 3H). MS (ESI-TOF) for  $\text{C}_{20}\text{H}_{15}\text{N}_5\text{O}_2\text{S}_2$  [ $\text{M} + \text{H}$ ] $^+$  calculated 422.1, found 421.9.

**6{5,5}; N-(benzo[d]thiazol-2-yl)-2-((3-ethyl-4-oxo-4,5-dihydro-3H-pyrimido[5,4-b]indol-2-yl)thio)acetamide** (yield = 83%):  $^1\text{H}$  NMR (400 MHz, DMSO- $d_6$ )  $\delta$  12.91 (br. s., 1H), 11.96 (s, 1H), 7.91 (d,  $J$  = 7.81 Hz, 1H), 7.82 (dd,  $J$  = 8.29, 16.59 Hz, 2H), 7.46 (t,  $J$  = 7.80 Hz, 1H), 7.41 (d,  $J$  = 8.29 Hz, 1H), 7.32 (t,  $J$  = 7.40 Hz, 1H), 7.28 (t,  $J$  = 7.50 Hz, 1H), 6.92 (t,  $J$  = 7.32 Hz, 1H), 4.38 (s, 2H), 4.21 (q,  $J$  = 7.30 Hz, 2H), 1.35 (t,  $J$  = 6.83 Hz, 3H). MS (ESI-TOF) for  $\text{C}_{21}\text{H}_{17}\text{N}_5\text{O}_2\text{S}_2$  [ $\text{M} - \text{H}$ ] $^-$  calculated 434.1, found 433.9.

**6{6,5}; N-(benzo[d]thiazol-2-yl)-2-((4-oxo-3-propyl-4,5-dihydro-3H-pyrimido[5,4-b]indol-2-yl)thio)acetamide** (yield = 83%):  $^1\text{H}$  NMR (400 MHz, DMSO- $d_6$ )  $\delta$  12.91 (s, 1H), 11.97 (s, 1H), 7.91 (d,  $J$  = 7.80 Hz, 1H), 7.82 (dd,  $J$  = 8.29, 14.63 Hz, 2H), 7.46 (t,  $J$  = 7.56 Hz, 1H), 7.41 (d,  $J$  = 8.29 Hz, 1H), 7.32 (t,  $J$  = 7.80 Hz, 1H), 7.28 (t,  $J$  = 7.80 Hz, 1H), 6.92 (t,  $J$  = 7.56 Hz, 1H), 4.38 (s, 2H), 4.12 (t,  $J$  = 7.80 Hz, 2H), 1.79 (sxt,  $J$  = 7.80 Hz, 2H), 0.99 (t,  $J$  = 7.31 Hz, 3H). MS (ESI-TOF) for  $\text{C}_{22}\text{H}_{19}\text{N}_5\text{O}_2\text{S}_2$  [ $\text{M} - \text{H}$ ] $^-$  calculated 448.1, found 448.0.

**6{7,5}; N-(benzo[d]thiazol-2-yl)-2-((3-butyl-4-oxo-4,5-dihydro-3H-pyrimido[5,4-b]indol-2-yl)thio)acetamide** (yield = 74%):  $^1\text{H}$  NMR (400 MHz, DMSO- $d_6$ )  $\delta$  12.91 (s, 1H), 11.96 (s, 1H), 7.91 (d,  $J$  = 7.80 Hz, 1H), 7.82 (dd,  $J$  = 8.04, 16.82 Hz, 2H), 7.46 (t,  $J$  = 7.30 Hz, 1H), 7.41 (d,  $J$  = 8.29 Hz, 1H), 7.30 (td,  $J$  = 7.31, 12.68 Hz, 2H), 6.92 (t,  $J$  = 7.31 Hz, 1H), 4.38 (s, 2H), 4.16 (t,  $J$  = 7.80 Hz, 2H), 1.75 (quin,  $J$  = 7.68 Hz, 2H), 1.43 (sxt,  $J$  = 7.41 Hz, 2H), 0.98 (t,  $J$  = 7.31 Hz,

3H).  $^{13}\text{C}$  NMR (126 MHz, DMSO- $d_6$ )  $\delta$  167.9, 158.1, 154.5, 150.9, 148.7, 138.8, 136.7, 131.4, 127.1, 126.1, 123.5, 121.7, 120.5, 120.1, 120.1, 119.7, 118.9, 112.6, 43.9, 35.9, 29.9, 19.6, 13.6. HRMS for  $\text{C}_{23}\text{H}_{21}\text{N}_5\text{O}_2\text{S}_2$  [ $\text{M} + \text{Na}^+$ ] calculated 486.1029, found 486.1028.

**6{1,6}; 2-((3-(4-fluorophenyl)-4-oxo-4,5-dihydro-3H-pyrimido[5,4-*b*]indol-2-yl)thio)-N-(6-methylbenzo[*d*]thiazol-2-yl)-acetamide** (yield = 62%):  $^1\text{H}$  NMR (400 MHz, DMSO- $d_6$ )  $\delta$  12.77 (br. s., 1H), 12.10 (br. s., 1H), 7.86 (d,  $J = 8.29$  Hz, 1H), 7.68 - 7.75 (m, 2H), 7.58 - 7.66 (m,  $J = 3.90$  Hz, 2H), 7.41 - 7.52 (m,  $J = 8.30, 16.60$  Hz, 3H), 7.35 (t,  $J = 6.80$  Hz, 1H), 7.27 (d,  $J = 8.29$  Hz, 1H), 6.98 (t,  $J = 7.30$  Hz, 1H), 4.21 (s, 2H), 2.39 (s, 3H).  $^{13}\text{C}$  NMR (126 MHz, DMSO- $d_6$ )  $\delta$  167.7, 163.6, 161.6, 157.2, 154.9, 152.1, 146.6, 138.8, 137.0, 132.9, 132.2, 132.0, 131.9, 131.5, 127.4, 127.2, 121.3, 120.2, 120.0, 119.1, 116.6, 116.5, 112.7, 104.5, 36.3, 20.9. HRMS for  $\text{C}_{26}\text{H}_{18}\text{FN}_5\text{O}_2\text{S}_2$  [ $\text{M} + \text{Na}^+$ ] calculated 538.0778, found 538.0781.

**6{2,6}; 2-((3-(4-methoxyphenyl)-4-oxo-4,5-dihydro-3H-pyrimido[5,4-*b*]indol-2-yl)thio)-N-(6-methylbenzo[*d*]thiazol-2-yl)-acetamide** (yield = 53%):  $^1\text{H}$  NMR (400 MHz, DMSO- $d_6$ )  $\delta$  12.76 (s, 1H), 12.06 (s, 1H), 7.86 (d,  $J = 8.29$  Hz, 1H), 7.68 - 7.76 (m, 2H), 7.39 - 7.48 (m, 3H), 7.31 - 7.38 (m, 1H), 7.27 (d,  $J = 8.29$  Hz, 1H), 7.10 - 7.19 (m, 2H), 6.98 (t,  $J = 7.32$  Hz, 1H), 4.19 (s, 2H), 3.87 (s, 3H), 2.39 (s, 3H).  $^{13}\text{C}$  NMR (126 MHz, DMSO- $d_6$ )  $\delta$  167.8, 160.1, 157.2, 155.0, 152.8, 146.6, 138.8, 137.0, 132.9, 131.6, 130.7, 128.3, 127.4, 127.1, 121.3, 120.2, 120.2, 120.2, 119.9, 119.2, 114.7, 112.7, 55.5, 36.3, 20.9. HRMS for  $\text{C}_{27}\text{H}_{21}\text{N}_5\text{O}_3\text{S}_2$  [ $\text{M} + \text{Na}^+$ ] calculated 550.0978, found 550.0982.

**6{3,6}; 2-((3-isopropyl-4-oxo-4,5-dihydro-3H-pyrimido[5,4-*b*]indol-2-yl)thio)-N-(6-methylbenzo[*d*]thiazol-2-yl)-acetamide** (yield = 64%):  $^1\text{H}$  NMR (400 MHz, DMSO- $d_6$ )  $\delta$  12.83 (s, 1H), 11.86 (s, 1H), 7.78 (d,  $J = 7.81$  Hz, 1H), 7.67 - 7.76 (m, 2H), 7.40 (d,  $J = 7.81$  Hz, 1H),



7.24 - 7.35 (m, 2H), 6.89 (t,  $J = 7.30$  Hz, 1H), 4.57 - 4.74 (m, 1H), 4.32 (s, 2H), 2.38 (br. s., 3H), 1.66 (d,  $J = 6.34$  Hz, 6H). MS (ESI-TOF) for  $C_{23}H_{21}N_5O_2S_2$  [ $M + Na^+$ ] calculated 486.1, found 486.0.

**6{4,6}; 2-((3-methyl-4-oxo-4,5-dihydro-3H-pyrimido[5,4-b]indol-2-yl)thio)-N-(6-methylbenzo[d]thiazol-2-yl)-acetamide** (yield = 64%):  $^1H$  NMR (400 MHz, DMSO- $d_6$ )  $\delta$  12.81 (br. s., 1H), 11.96 (s, 1H), 7.81 (d,  $J = 8.29$  Hz, 1H), 7.66 - 7.75 (m, 2H), 7.41 (d,  $J = 8.29$  Hz, 1H), 7.32 (t,  $J = 7.80$  Hz, 1H), 7.27 (d,  $J = 8.29$  Hz, 1H), 6.93 (t,  $J = 7.32$  Hz, 1H), 4.37 (s, 2H), 3.63 (s, 3H), 2.38 (s, 3H).  $^{13}C$  NMR (126 MHz, DMSO- $d_6$ )  $\delta$  167.7, 157.2, 154.6, 151.6, 146.6, 138.7, 136.7, 132.9, 131.5, 127.4, 127.4, 127.1, 121.3, 120.2, 120.1, 119.7, 118.7, 112.6, 35.9, 30.0, 20.9. HRMS for  $C_{21}H_{17}N_5O_2S_2$  [ $M + Na^+$ ] calculated 458.0716, found 458.0720.

**6{5,6}; 2-((3-ethyl-4-oxo-4,5-dihydro-3H-pyrimido[5,4-b]indol-2-yl)thio)-N-(6-methylbenzo[d]thiazol-2-yl)-acetamide** (yield = 88%):  $^1H$  NMR (400 MHz, DMSO- $d_6$ )  $\delta$  12.82 (s, 1H), 11.95 (s, 1H), 7.80 (d,  $J = 7.81$  Hz, 1H), 7.69 (s, 1H), 7.72 (d,  $J = 8.29$  Hz, 1H), 7.41 (d,  $J = 8.29$  Hz, 1H), 7.26 (d,  $J = 8.29$  Hz, 1H), 7.32 (t,  $J = 7.80$  Hz, 1H), 6.93 (t,  $J = 7.56$  Hz, 1H), 4.36 (s, 2H), 4.21 (q,  $J = 7.32$  Hz, 2H), 2.38 (s, 3H), 1.35 (t,  $J = 7.07$  Hz, 3H).  $^{13}C$  NMR (126 MHz, TFA- $d$ )  $\delta$  170.7, 155.9, 140.6, 140.1, 132.5, 131.8, 131.7, 126.0, 123.7, 121.9, 119.2, 118.6, 115.7, 114.9, 114.2, 113.5, 113.4, 112.6, 110.4, 44.6, 19.6, 11.5. HRMS for  $C_{22}H_{19}N_5O_2S_2$  [ $M + Na^+$ ] calculated 472.0872, found 472.0873.

**6{6,6}; 2-((4-oxo-3-propyl-4,5-dihydro-3H-pyrimido[5,4-b]indol-2-yl)thio)-N-(6-methylbenzo[d]thiazol-2-yl)-acetamide** (yield = 90%):  $^1H$  NMR (400 MHz, DMSO- $d_6$ )  $\delta$  12.83 (s, 1H), 11.96 (s, 1H), 7.81 (d,  $J = 7.81$  Hz, 1H), 7.59 - 7.74 (m, 2H), 7.37 - 7.47 (m, 1H), 7.32 (t,  $J = 7.80$  Hz, 1H), 7.27 (d,  $J = 8.29$  Hz, 1H), 6.93 (t,  $J = 7.56$  Hz, 1H), 4.36 (br. s., 2H), 4.11 (t,  $J = 7.80$  Hz, 2H), 2.38 (br. s., 3H), 1.79 (sxt,  $J = 7.30$  Hz, 2H), 0.99 (t,  $J = 7.30$  Hz, 3H).  $^{13}C$  NMR

(126 MHz, DMSO- $d_6$ )  $\delta$  167.8, 157.2, 154.5, 151.0, 146.6, 138.8, 136.7, 132.9, 131.5, 127.4, 127.2, 121.3, 120.2, 120.1, 119.8, 118.9, 112.6, 45.5, 35.9, 21.3, 21.0, 11.1. HRMS for  $C_{23}H_{21}N_5O_2S_2$  [M + Na<sup>+</sup>] calculated 486.1029, found 486.1029.

**6{7,6}; 2-((3-butyl-4-oxo-4,5-dihydro-3H-pyrimido[5,4-*b*]indol-2-yl)thio)-N-(6-methylbenzo[*d*]thiazol-2-yl)-acetamide** (yield = 67%): <sup>1</sup>H NMR (400 MHz, DMSO- $d_6$ )  $\delta$  12.82 (s, 1H), 11.95 (s, 1H), 7.80 (d,  $J$  = 7.81 Hz, 1H), 7.72 (d,  $J$  = 8.29 Hz, 1H), 7.70 (s, 1H), 7.41 (d,  $J$  = 7.81 Hz, 1H), 7.32 (t,  $J$  = 7.40 Hz, 1H), 7.26 (d,  $J$  = 8.29 Hz, 1H), 6.93 (t,  $J$  = 7.56 Hz, 1H), 4.36 (s, 2H), 4.15 (t,  $J$  = 7.56 Hz, 2H), 2.38 (s, 3H), 1.75 (quin,  $J$  = 7.30 Hz, 2H), 1.43 (sxt,  $J$  = 7.40 Hz, 2H), 0.98 (t,  $J$  = 7.32 Hz, 3H). <sup>13</sup>C NMR (126 MHz, DMSO- $d_6$ )  $\delta$  167.8, 157.2, 154.5, 150.9, 146.6, 138.8, 136.7, 132.9, 131.5, 127.4, 127.2, 121.3, 120.2, 120.1, 119.8, 118.9, 112.6, 43.9, 35.9, 29.9, 20.9, 19.7, 13.6. HRMS for  $C_{24}H_{23}N_5O_2S_2$  [M + Na<sup>+</sup>] calculated 500.1185, found 500.1182.

**9a; N-(benzo[*d*]thiazol-2-yl)-2-((4-oxo-3-pentyl-4,5-dihydro-3H-pyrimido[5,4-*b*]indol-2-yl)thio)acetamide** (yield = 82%): <sup>1</sup>H NMR (400 MHz, DMSO- $d_6$ )  $\delta$  12.90 (br. s., 1H), 11.94 (s, 1H), 7.91 (d,  $J$  = 7.81 Hz, 1H), 7.84 (d,  $J$  = 7.80 Hz, 1H), 7.80 (d,  $J$  = 7.81 Hz, 1H), 7.45 (t,  $J$  = 7.81 Hz, 1H), 7.41 (d,  $J$  = 8.29 Hz, 1H), 7.32 (t,  $J$  = 7.30 Hz, 1H), 7.28 (t,  $J$  = 7.80 Hz, 1H), 6.92 (t,  $J$  = 7.07 Hz, 1H), 4.38 (s, 2H), 4.07 - 4.25 (m, 2H), 1.76 (quin,  $J$  = 7.30 Hz, 2H), 1.26 - 1.52 (m, 6H), 0.89 (t,  $J$  = 7.32 Hz, 3H). MS (ESI-TOF) for  $C_{24}H_{23}N_5O_2S_2$  [M - H]<sup>-</sup> calculated 476.1, found 475.9.

**9b; 2-((4-oxo-3-pentyl-4,5-dihydro-3H-pyrimido[5,4-*b*]indol-2-yl)thio)-N-(6-methylbenzo[*d*]thiazol-2-yl)-acetamide** (yield = 87%): <sup>1</sup>H NMR (400 MHz, DMSO- $d_6$ )  $\delta$  12.81 (s, 1H), 11.95 (s, 1H), 7.80 (d,  $J$  = 7.81 Hz, 1H), 7.69 (s, 1H), 7.72 (d,  $J$  = 7.81 Hz, 1H), 7.39 - 7.45 (m, 1H), 7.29 - 7.35 (m, 1H), 7.26 (d,  $J$  = 8.29 Hz, 1H), 6.93 (t,  $J$  = 7.32 Hz, 1H), 4.36 (s,

2H), 4.09 - 4.19 (m, 2H), 2.38 (s, 3H), 1.76 (quin,  $J = 7.80$  Hz, 2H), 1.23 - 1.50 (m, 6H), 0.89 (t,  $J = 6.83$  Hz, 3H). MS (ESI-TOF) for  $C_{25}H_{25}N_5O_2S_2$   $[M + H]^+$  calculated 490.1, found 491.9.

**10a; *N*-(benzo[*d*]thiazol-2-yl)-2-((3-hexyl-4-oxo-4,5-dihydro-3*H*-pyrimido[5,4-*b*]indol-2-yl)thio)acetamide** (yield = 67%):  $^1H$  NMR (400 MHz, DMSO- $d_6$ )  $\delta$  12.90 (s, 1H), 11.95 (s, 1H), 7.91 (d,  $J = 7.81$  Hz, 1H), 7.80 (d,  $J = 7.80$  Hz, 1H), 7.84 (d,  $J = 7.80$  Hz, 1H), 7.42 (d,  $J = 8.29$  Hz, 1H), 7.46 (t,  $J = 7.32$  Hz, 1H), 7.32 (t,  $J = 7.30$  Hz, 1H), 7.29 (t,  $J = 7.80$  Hz, 1H), 6.92 (t,  $J = 7.56$  Hz, 1H), 4.38 (s, 2H), 4.08 - 4.25 (m, 2H), 1.77 (quin,  $J = 7.30$  Hz, 2H), 1.29 - 1.50 (m, 4H), 0.92 (t,  $J = 7.30$  Hz, 3H). MS (ESI-TOF) for  $C_{25}H_{25}N_5O_2S_2$   $[M + Na^+]$  calculated 514.1, found 514.0.

**10b; 2-((3-hexyl-4-oxo-4,5-dihydro-3*H*-pyrimido[5,4-*b*]indol-2-yl)thio)-*N*-(6-methylbenzo[*d*]thiazol-2-yl)-acetamide** (yield = 73%):  $^1H$  NMR (400 MHz, DMSO- $d_6$ )  $\delta$  12.82 (s, 1H), 11.95 (s, 1H), 7.81 (d,  $J = 7.81$  Hz, 1H), 7.70 (s, 1H), 7.72 (d,  $J = 8.29$  Hz, 1H), 7.42 (d,  $J = 8.29$  Hz, 1H), 7.32 (t,  $J = 7.81$  Hz, 1H), 7.27 (d,  $J = 8.29$  Hz, 1H), 6.93 (t,  $J = 7.07$  Hz, 1H), 4.37 (s, 2H), 4.07 - 4.21 (m, 2H), 2.39 (s, 3H), 1.77 (quin,  $J = 7.30$  Hz, 2H), 1.31 - 1.47 (m, 4H), 0.92 (t,  $J = 6.83$  Hz, 3H). MS (ESI-TOF) for  $C_{26}H_{27}N_5O_2S_2$   $[M - H]^-$  calculated 504.2, found 504.0.

**11; *N*-(benzo[*d*]thiazol-2-yl)-2-((3-butyl-5-methyl-4-oxo-4,5-dihydro-3*H*-pyrimido[5,4-*b*]indol-2-yl)thio)acetamide** (yield = 26%):  $^1H$  NMR (400 MHz, DMSO- $d_6$ )  $\delta$  12.90 (s, 1H), 7.90 (d,  $J = 7.80$  Hz, 1H), 7.84 (d,  $J = 7.80$  Hz, 2H), 7.56 (d,  $J = 8.78$  Hz, 1H), 7.45 (t,  $J = 7.80$  Hz, 1H), 7.40 (t,  $J = 7.30$  Hz, 1H), 7.28 (t,  $J = 7.56$  Hz, 1H), 6.96 (t,  $J = 7.56$  Hz, 1H), 4.38 (s, 2H), 4.10 - 4.16 (m, 2H), 4.08 (s, 3H), 1.74 (quin,  $J = 15.10$  Hz, 2H), 1.44 (sxt,  $J = 7.31$  Hz, 2H), 0.98 (t,  $J = 7.31$  Hz, 3H). MS (ESI-TOF) for  $C_{24}H_{23}N_5O_2S_2$   $[M + H]^+$  calculated 478.1, found 478.0.

**12; 2-((3-butyl-5-methyl-4-oxo-4,5-dihydro-3H-pyrimido[5,4-*b*]indol-2-yl)thio)-N-(6-methylbenzo[*d*]thiazol-2-yl)acetamide** (yield = 33%). <sup>1</sup>H NMR (400 MHz, DMSO-*d*<sub>6</sub>) δ 12.82 (s, 1H), 7.84 (d, *J* = 7.81 Hz, 1H), 7.72 (d, *J* = 8.29 Hz, 1H), 7.67 - 7.74 (m, 1H), 7.57 (d, *J* = 8.29 Hz, 1H), 7.41 (t, *J* = 7.81 Hz, 1H), 7.26 (d, *J* = 8.29 Hz, 1H), 6.97 (t, *J* = 7.32 Hz, 1H), 4.36 (s, 2H), 4.09 (s, 3H), 4.13 (t, *J* = 7.80 Hz, 2H), 2.38 (s, 3H), 1.74 (quin, *J* = 7.81 Hz, 2H), 1.44 (sxt, *J* = 7.32 Hz, 2H), 0.98 (t, *J* = 7.32 Hz, 3H). MS (ESI-TOF) for C<sub>25</sub>H<sub>25</sub>N<sub>5</sub>O<sub>2</sub>S<sub>2</sub> [M + H]<sup>+</sup> calculated 492.2, found 492.0.

# <sup>1</sup>H NMR, LC-MS

## 6{1,1}

4/21/2017 10:09:13 AM

| Acquisition Time (sec) | 2.0114      | Comment        | STANDARD 1H OBSERVE                                                     |                      |         | Date                   | Mar 24 2017         |
|------------------------|-------------|----------------|-------------------------------------------------------------------------|----------------------|---------|------------------------|---------------------|
| Date Stamp             | Mar 24 2017 | File Name      | C:\Documents and Settings\Mycoahhh\My Documents\NMR\mchan\2b122.fid\fid |                      |         |                        |                     |
| Frequency (MHz)        | 399.91      | Nucleus        | 1H                                                                      | Number of Transients | 16      | Original Points Count  | 16078               |
| Points Count           | 16384       | Pulse Sequence | s2pul                                                                   | Receiver Gain        | 30.00   | Solvent                | DMSO-d6             |
| Spectrum Offset (Hz)   | 2029.0183   | Spectrum Type  | STANDARD                                                                | Sweep Width (Hz)     | 7993.60 | Temperature (degree C) | AMBIENT TEMPERATURE |

<sup>1</sup>H NMR (400 MHz, DMSO-d<sub>6</sub>) δ 12.15 (s, 1H), 7.91 (d, *J* = 7.81 Hz, 1H), 7.56 (d, *J* = 4.88 Hz, 1H), 7.59 (d, *J* = 4.88 Hz, 1H), 7.42 - 7.55 (m, 4H), 7.26 (t, *J* = 7.32 Hz, 1H), 4.04 (s, 2H), 3.71 (s, 3H)

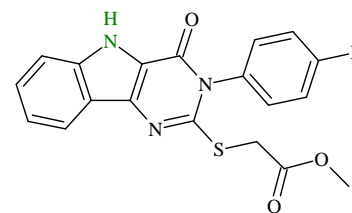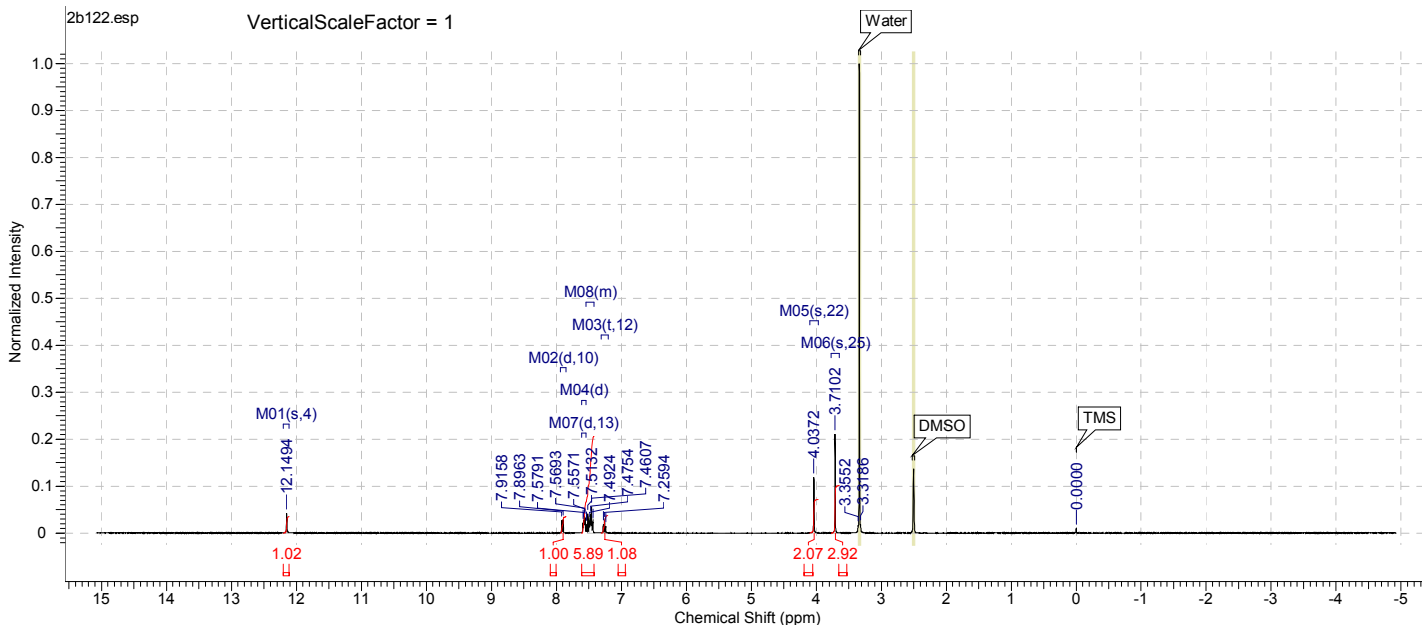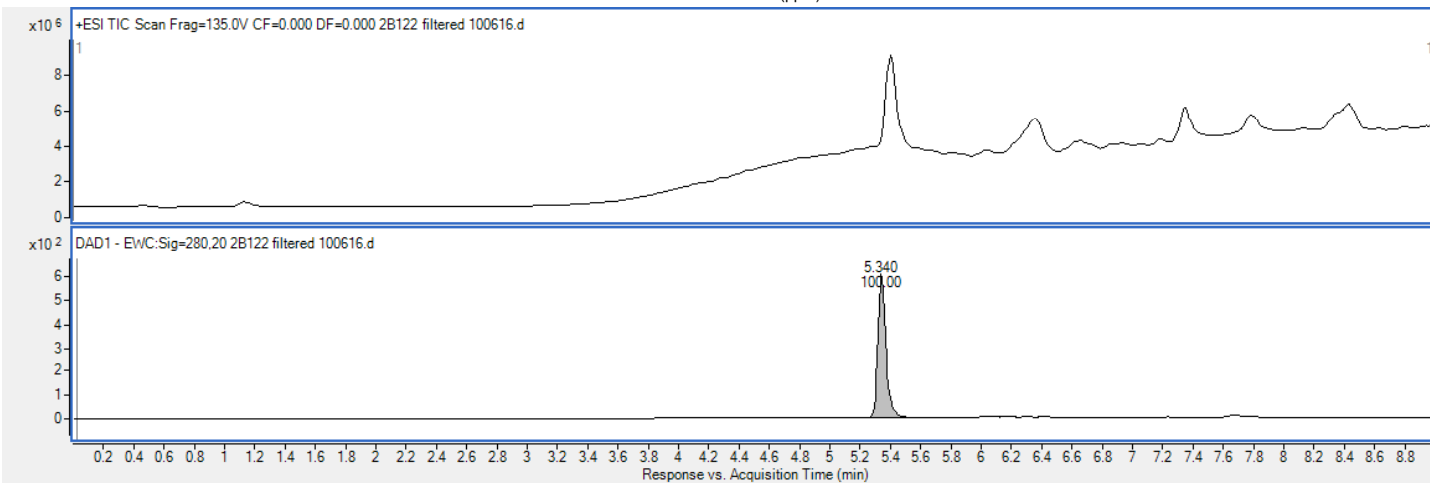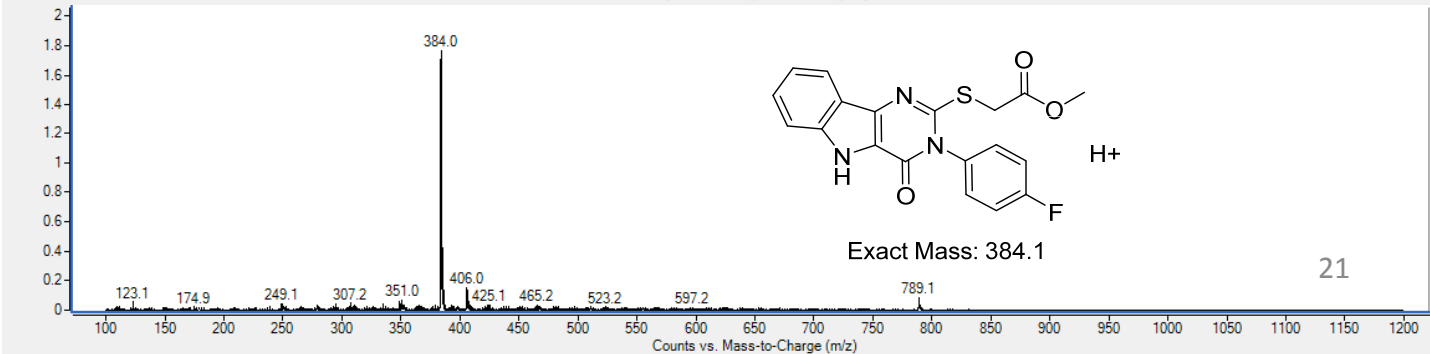

# <sup>1</sup>H NMR, LC-MS

## 6{2,1}

4/21/2017 10:10:53 AM

| Acquisition Time (sec) | 2.0097      | Comment        | STANDARD 1H OBSERVE                                                      | Date                   | Mar 24 2017         |
|------------------------|-------------|----------------|--------------------------------------------------------------------------|------------------------|---------------------|
| Date Stamp             | Mar 24 2017 | File Name      | C:\Documents and Settings\Mycoahhh\My Documents\NMR\michan\2b118.fid\fid |                        |                     |
| Frequency (MHz)        | 399.91      | Nucleus        | 1H                                                                       | Number of Transients   | 16                  |
| Points Count           | 16384       | Pulse Sequence | s2pul                                                                    | Receiver Gain          | 30.00               |
| Spectrum Offset (Hz)   | 2029.5062   | Spectrum Type  | STANDARD                                                                 | Sweep Width (Hz)       | 7993.60             |
|                        |             |                |                                                                          | Original Points Count  | 16065               |
|                        |             |                |                                                                          | Solvent                | DMSO-d6             |
|                        |             |                |                                                                          | Temperature (degree C) | AMBIENT TEMPERATURE |

<sup>1</sup>H NMR (400 MHz, DMSO-d<sub>6</sub>) δ 12.11 (s, 1H), 7.90 (d, *J* = 7.81 Hz, 1H), 7.46 (d, *J* = 8.29 Hz, 1H), 7.51 (t, *J* = 8.30 Hz, 1H), 7.38 (d, *J* = 8.78 Hz, 2H), 7.25 (t, *J* = 7.32 Hz, 1H), 7.14 (d, *J* = 8.78 Hz, 2H), 4.01 (s, 2H), 3.86 (s, 3H), 3.71 (s, 3H)

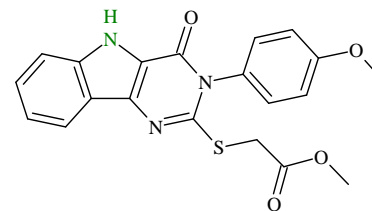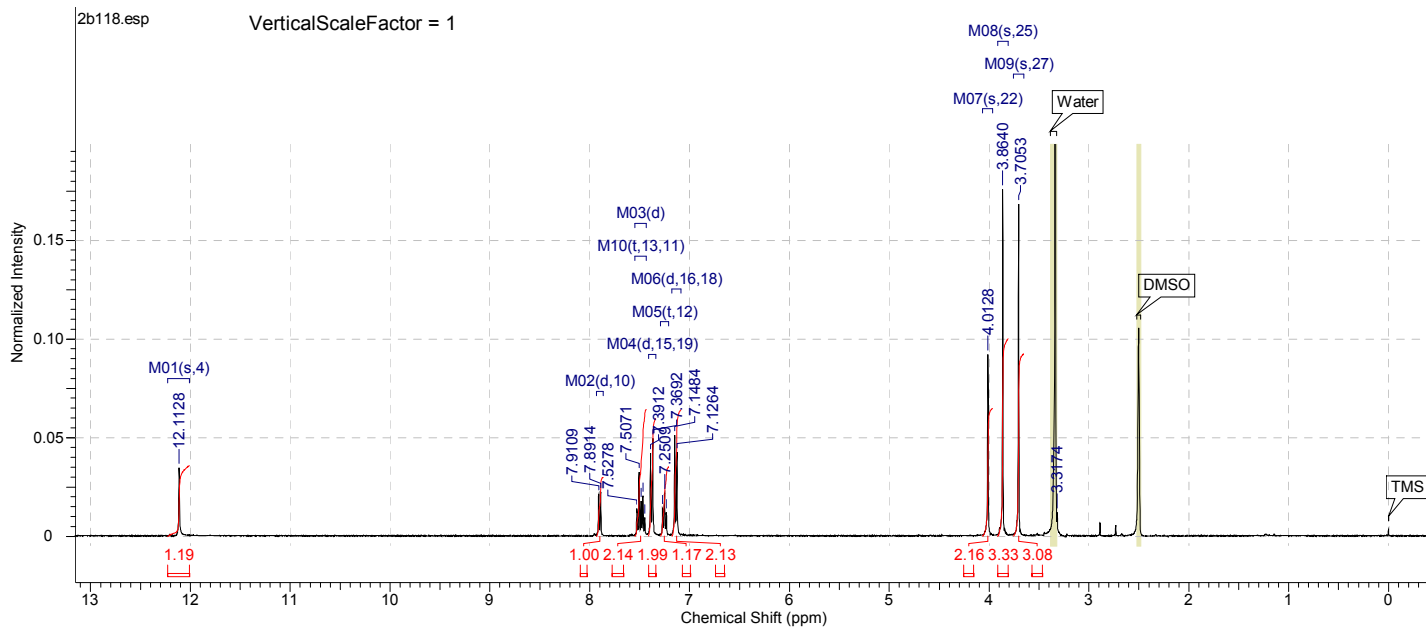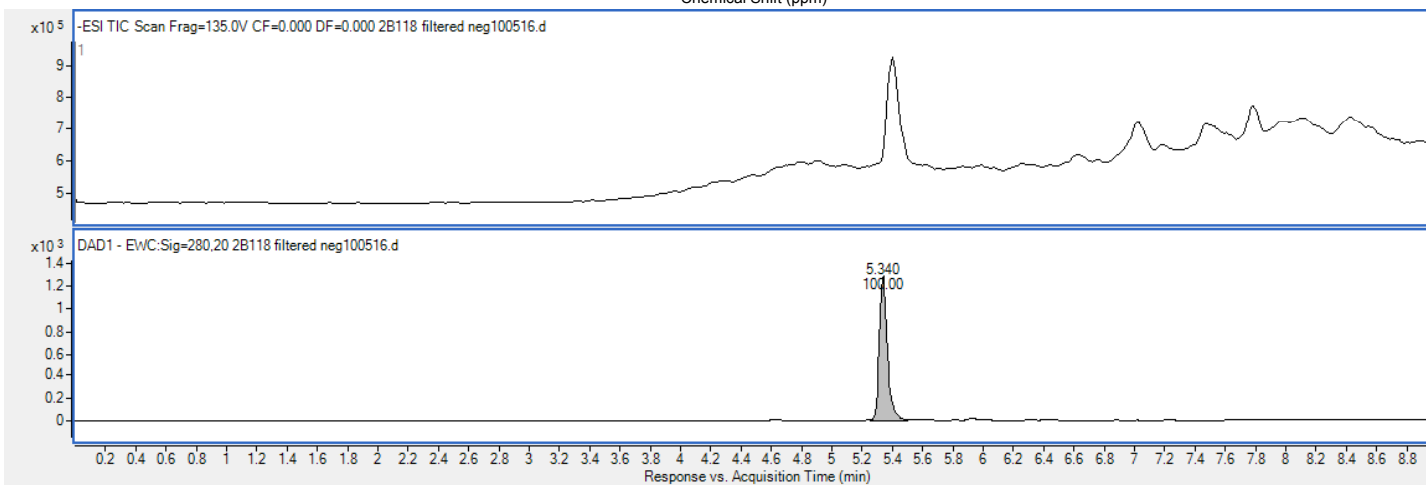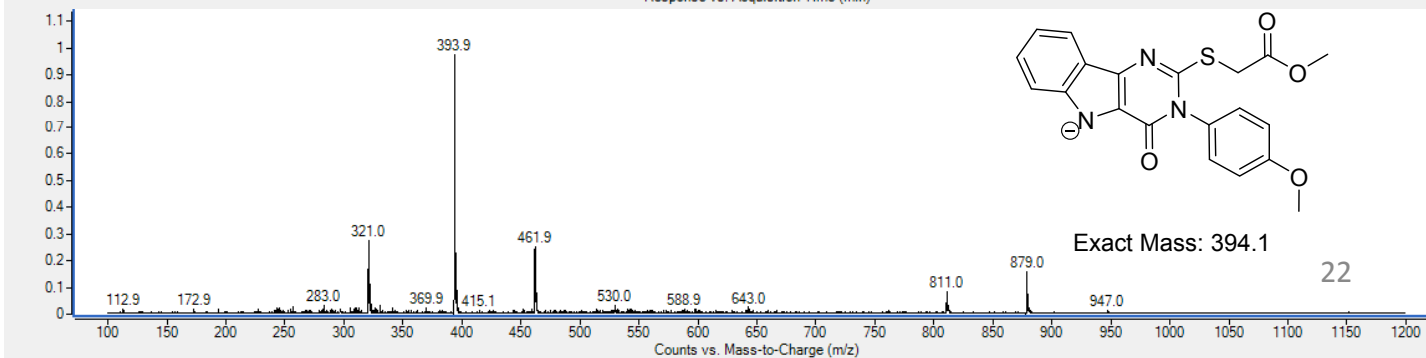

# <sup>1</sup>H NMR, LC-MS

# 6{3,1}

4/21/2017 10:11:55 AM

| Acquisition Time (sec) | 2.0211      | Comment        | STANDARD 1H OBSERVE                                                     | Date                   | Mar 24 2017         |
|------------------------|-------------|----------------|-------------------------------------------------------------------------|------------------------|---------------------|
| Date Stamp             | Mar 24 2017 | File Name      | C:\Documents and Settings\Mycoahhh\My Documents\NMR\mchan\2b116.fid\fid |                        |                     |
| Frequency (MHz)        | 399.91      | Nucleus        | 1H                                                                      | Number of Transients   | 16                  |
| Points Count           | 16384       | Pulse Sequence | s2pul                                                                   | Receiver Gain          | 30.00               |
| Spectrum Offset (Hz)   | 2029.9941   | Spectrum Type  | STANDARD                                                                | Sweep Width (Hz)       | 7993.60             |
|                        |             |                |                                                                         | Solvent                | DMSO-d6             |
|                        |             |                |                                                                         | Temperature (degree C) | AMBIENT TEMPERATURE |

<sup>1</sup>H NMR (400 MHz, DMSO-d<sub>6</sub>) δ 11.91 (s, 1H), 7.83 (d, *J* = 7.81 Hz, 1H), 7.49 (d, *J* = 8.29 Hz, 1H), 7.44 (t, *J* = 7.32 Hz, 1H), 7.22 (t, *J* = 7.32 Hz, 1H), 4.51 - 4.79 (m, 1H), 4.14 (s, 2H), 3.72 (s, 3H), 1.65 (d, *J* = 6.34 Hz, 6H)

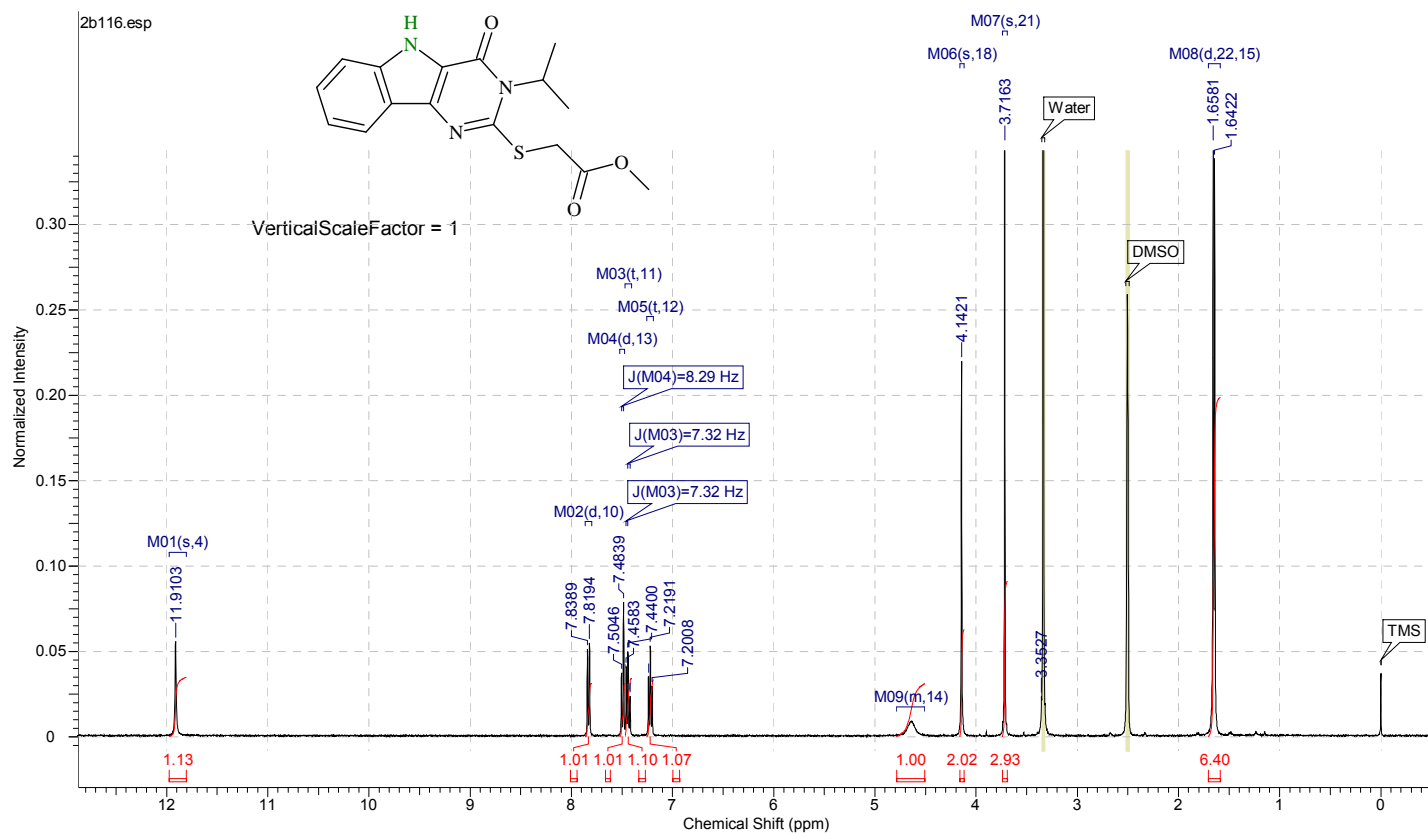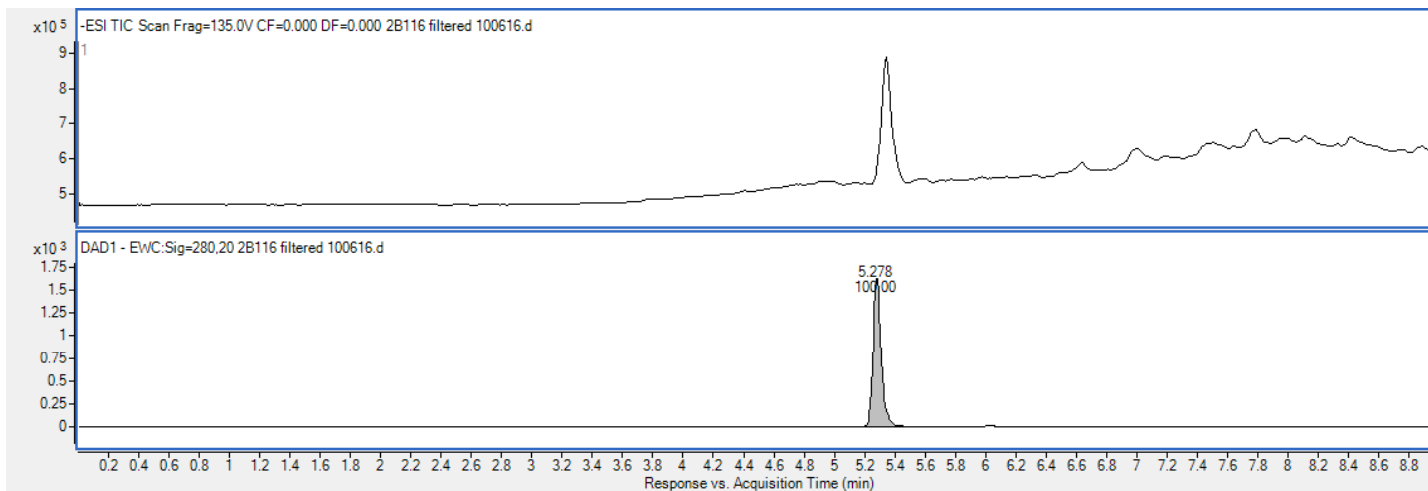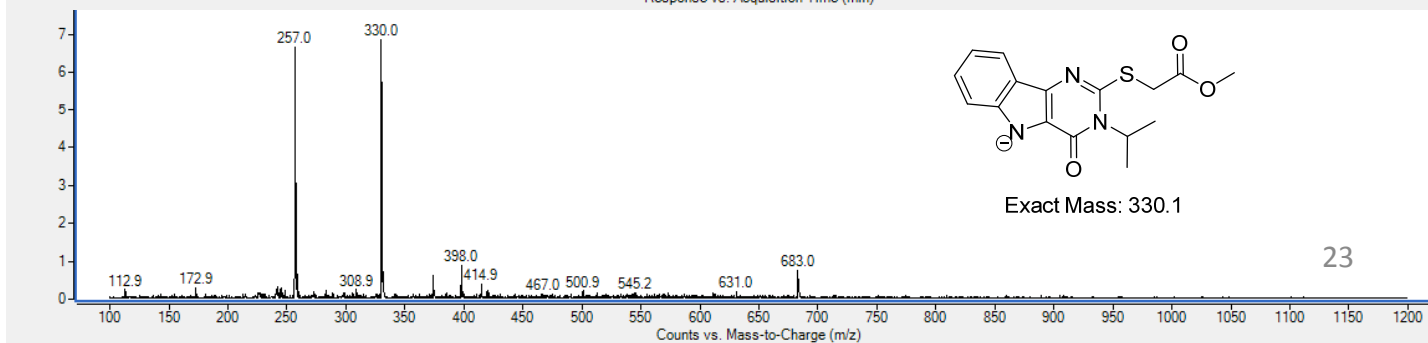

# <sup>1</sup>H NMR, LC-MS

# 6{4,1}

4/21/2017 10:14:03 AM

| Acquisition Time (sec) | 2.0179      | Comment        | STANDARD 1H OBSERVE                                                    |                      | Date    | Mar 24 2017            |                     |
|------------------------|-------------|----------------|------------------------------------------------------------------------|----------------------|---------|------------------------|---------------------|
| Date Stamp             | Mar 24 2017 | File Name      | C:\Documents and Settings\Mycoahhh\My Documents\NMR\mchan\2b53.fid\fid |                      |         |                        |                     |
| Frequency (MHz)        | 399.91      | Nucleus        | 1H                                                                     | Number of Transients | 16      | Original Points Count  | 16130               |
| Points Count           | 16384       | Pulse Sequence | s2pul                                                                  | Receiver Gain        | 30.00   | Solvent                | DMSO-d6             |
| Spectrum Offset (Hz)   | 2028.5304   | Spectrum Type  | STANDARD                                                               | Sweep Width (Hz)     | 7993.60 | Temperature (degree C) | AMBIENT TEMPERATURE |

<sup>1</sup>H NMR (400 MHz, DMSO-d<sub>6</sub>) δ 12.01 (s, 1H), 7.86 (d, *J* = 7.81 Hz, 1H), 7.45 (t, *J* = 7.30 Hz, 1H), 7.50 (d, *J* = 8.29 Hz, 1H), 7.22 (t, *J* = 7.32 Hz, 1H), 4.19 (s, 2H), 3.71 (s, 3H), 3.62 (s, 3H)

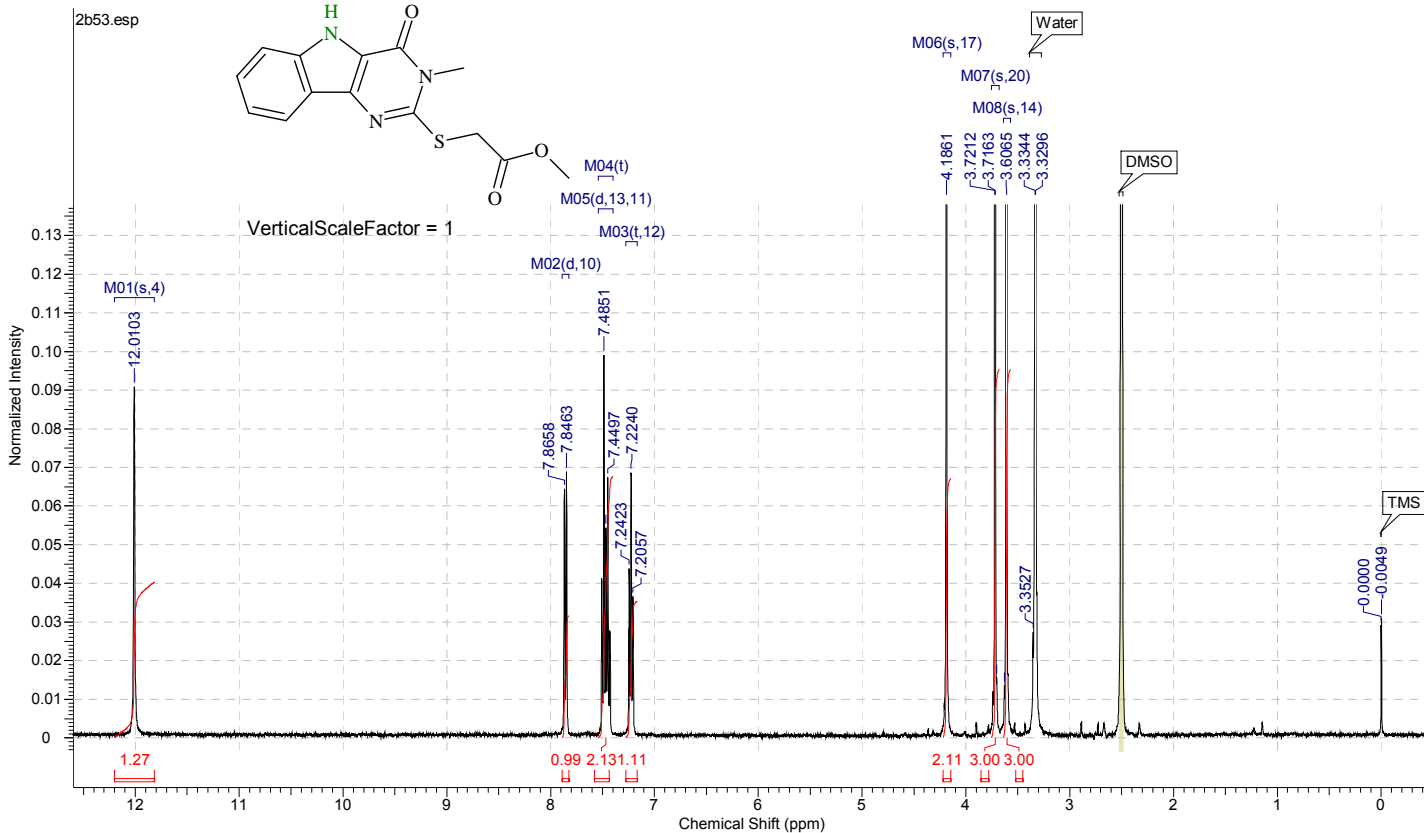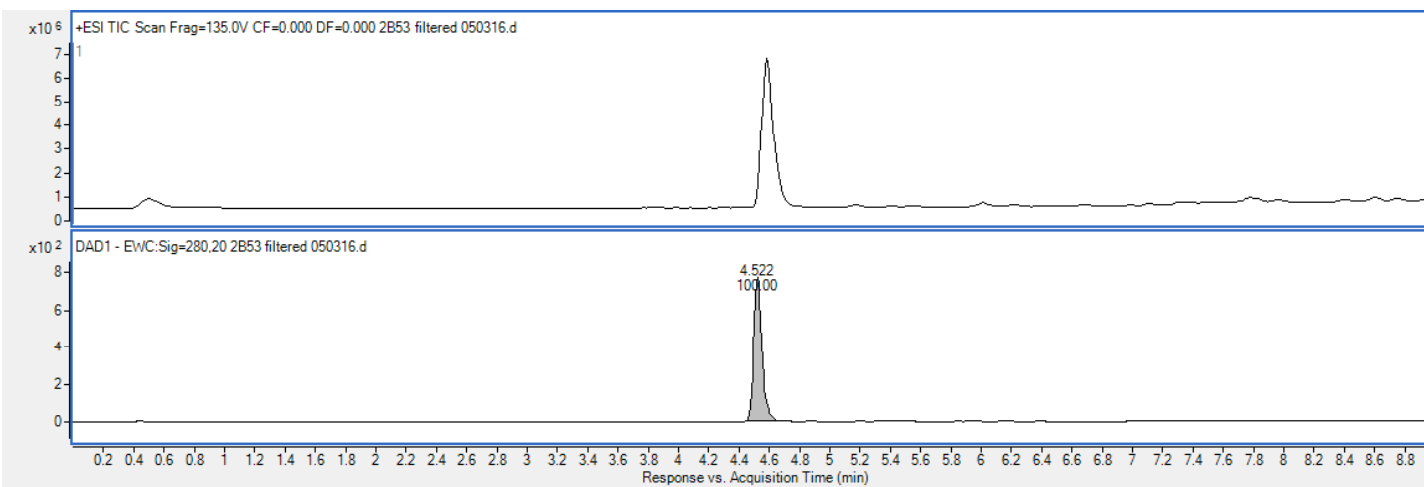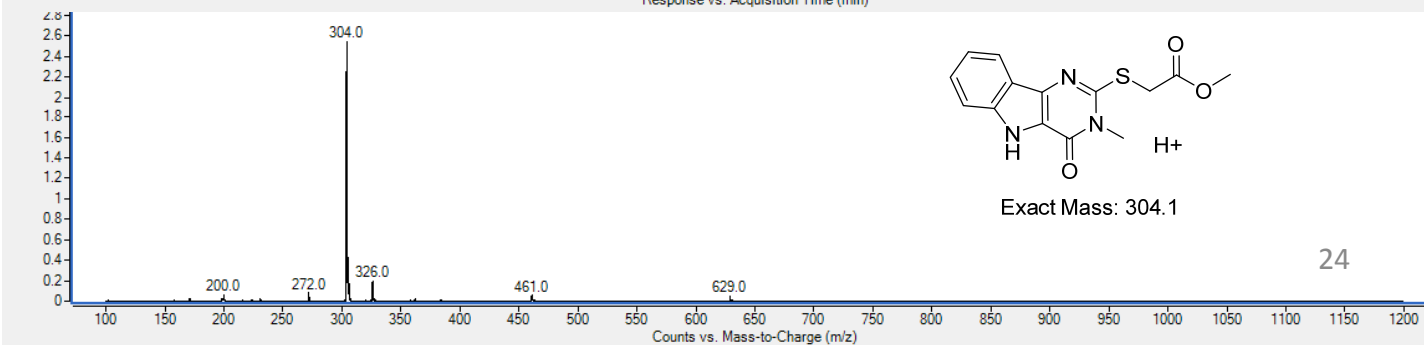



# <sup>1</sup>H NMR, LC-MS

## 6{5,1}

4/21/2017 10:15:11 AM

| Acquisition Time (sec) | 2.0195      | Comment        | STANDARD 1H OBSERVE                                                     |                      | Date    | Mar 24 2017            |                     |
|------------------------|-------------|----------------|-------------------------------------------------------------------------|----------------------|---------|------------------------|---------------------|
| Date Stamp             | Mar 24 2017 | File Name      | C:\Documents and Settings\Mycoahhh\My Documents\NMR\mchan\1y212.fid\fid |                      |         |                        |                     |
| Frequency (MHz)        | 399.91      | Nucleus        | 1H                                                                      | Number of Transients | 16      | Original Points Count  | 16143               |
| Points Count           | 16384       | Pulse Sequence | s2pul                                                                   | Receiver Gain        | 30.00   | Solvent                | DMSO-d6             |
| Spectrum Offset (Hz)   | 2029.5062   | Spectrum Type  | STANDARD                                                                | Sweep Width (Hz)     | 7993.60 | Temperature (degree C) | AMBIENT TEMPERATURE |

<sup>1</sup>H NMR (400 MHz, DMSO-d<sub>6</sub>) δ 12.01 (s, 1H), 7.85 (d, *J* = 7.81 Hz, 1H), 7.44 (d, *J* = 7.80 Hz, 1H), 7.49 (t, *J* = 8.30 Hz, 2H), 7.23 (t, *J* = 7.32 Hz, 1H), 4.08 - 4.28 (m, 2H), 4.20 (q, *J* = 6.80 Hz, 1H), 3.72 (s, 3H), 1.33 (t, *J* = 7.07 Hz, 3H)

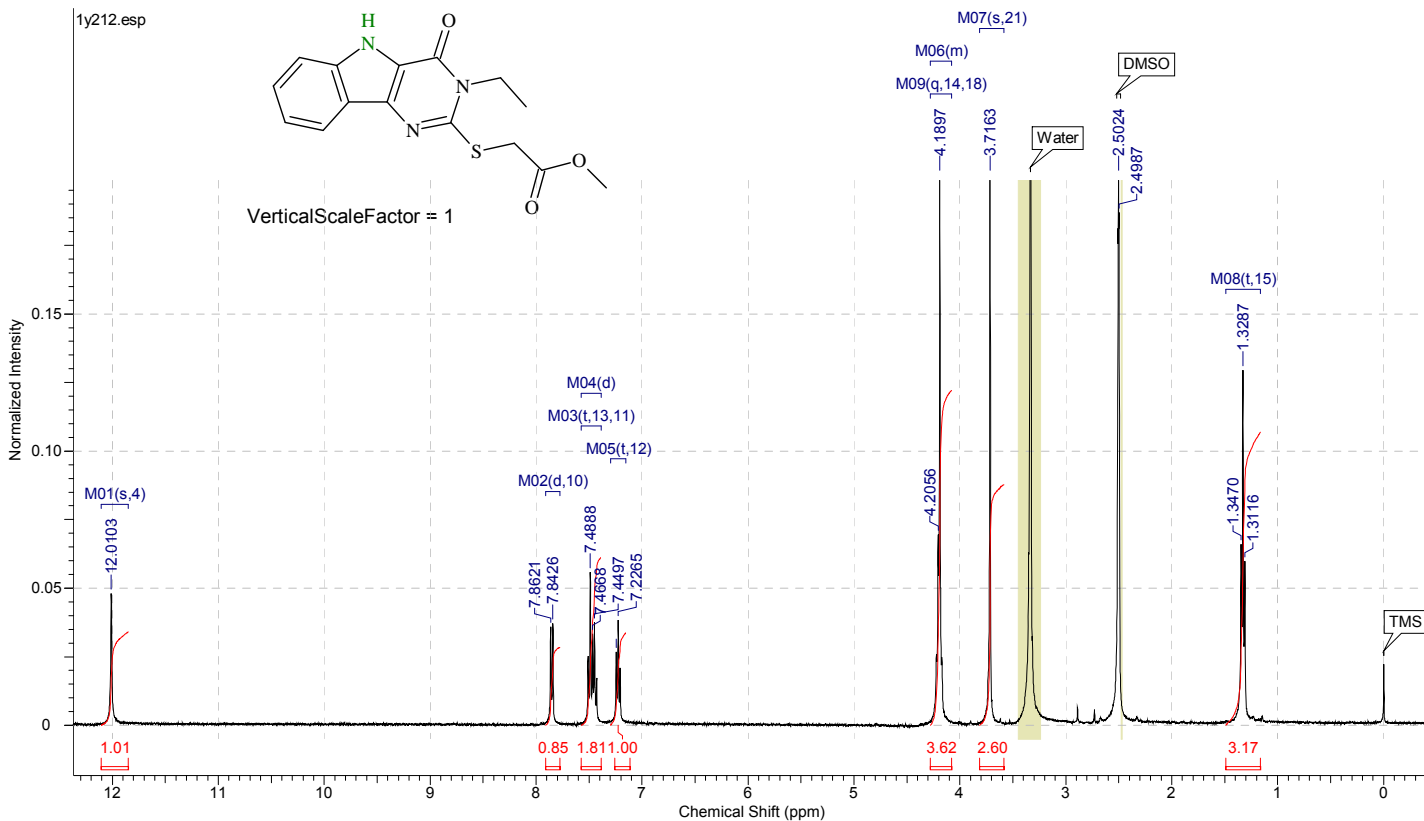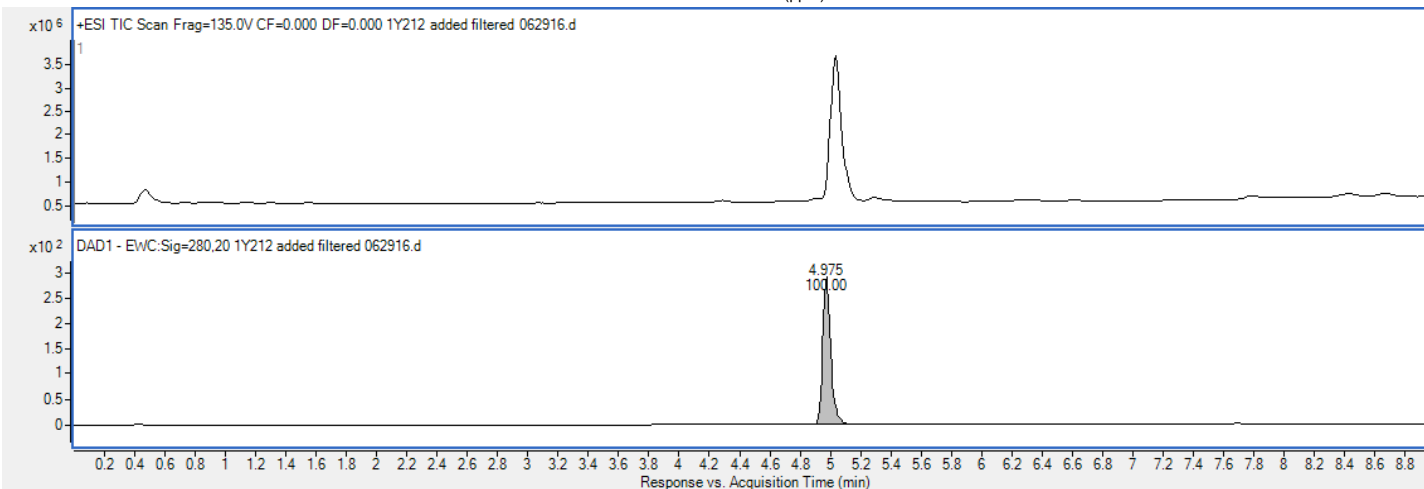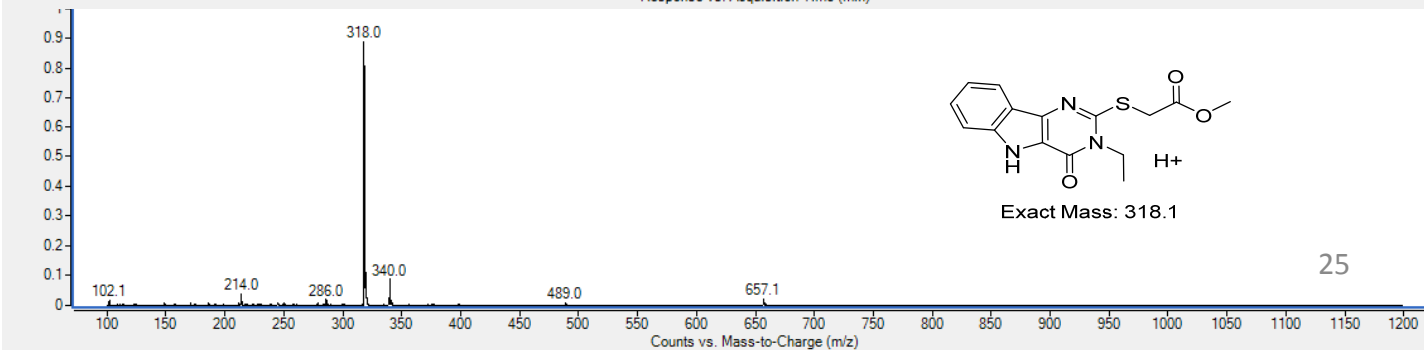

# <sup>1</sup>H NMR, LC-MS

## 6{6,1}

3/27/2017 10:57:42 AM

| Acquisition Time (sec) | 2.0227      | Comment        | STANDARD 1H OBSERVE                                                      |                      |         | Date                   | Mar 24 2017         |
|------------------------|-------------|----------------|--------------------------------------------------------------------------|----------------------|---------|------------------------|---------------------|
| Date Stamp             | Mar 24 2017 | File Name      | C:\Documents and Settings\Mycoahhh\My Documents\NMR\michan\1y210.fid\fid |                      |         |                        |                     |
| Frequency (MHz)        | 399.91      | Nucleus        | 1H                                                                       | Number of Transients | 64      | Original Points Count  | 16169               |
| Points Count           | 16384       | Pulse Sequence | s2pul                                                                    | Receiver Gain        | 30.00   | Solvent                | DMSO-d6             |
| Spectrum Offset (Hz)   | 2025.6981   | Spectrum Type  | STANDARD                                                                 | Sweep Width (Hz)     | 7993.60 | Temperature (degree C) | AMBIENT TEMPERATURE |

<sup>1</sup>H NMR (400 MHz, DMSO-d<sub>6</sub>) δ 12.00 (s, 1H), 7.84 (d, *J* = 7.81 Hz, 1H), 7.48 (t, *J* = 8.30 Hz, 1H), 7.43 (d, *J* = 7.81 Hz, 1H), 7.22 (t, *J* = 7.56 Hz, 1H), 4.18 (s, 2H), 4.04 - 4.14 (m, 2H), 3.70 (s, 3H), 1.76 (sxt, *J* = 7.80 Hz, 2H), 0.97 (t, *J* = 7.32 Hz, 3H)

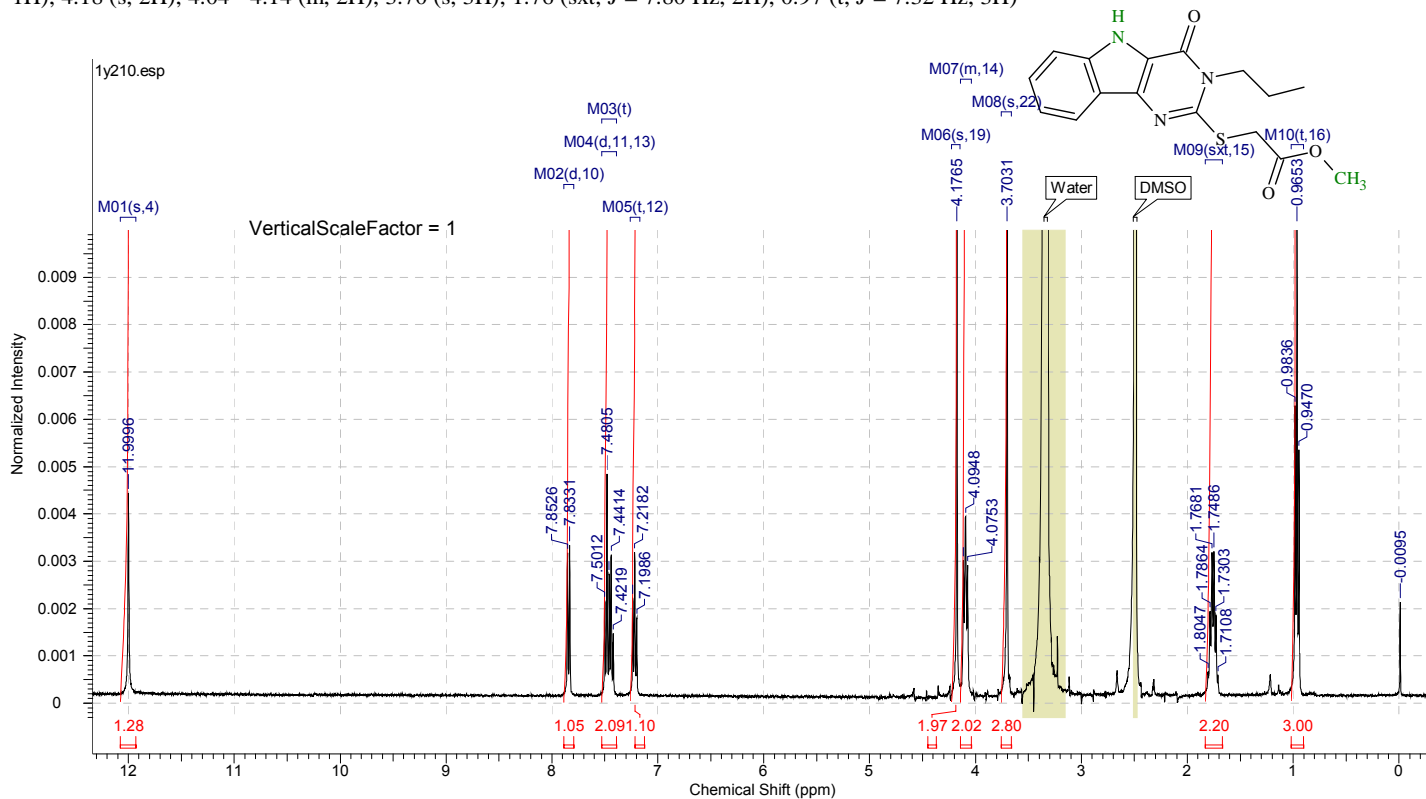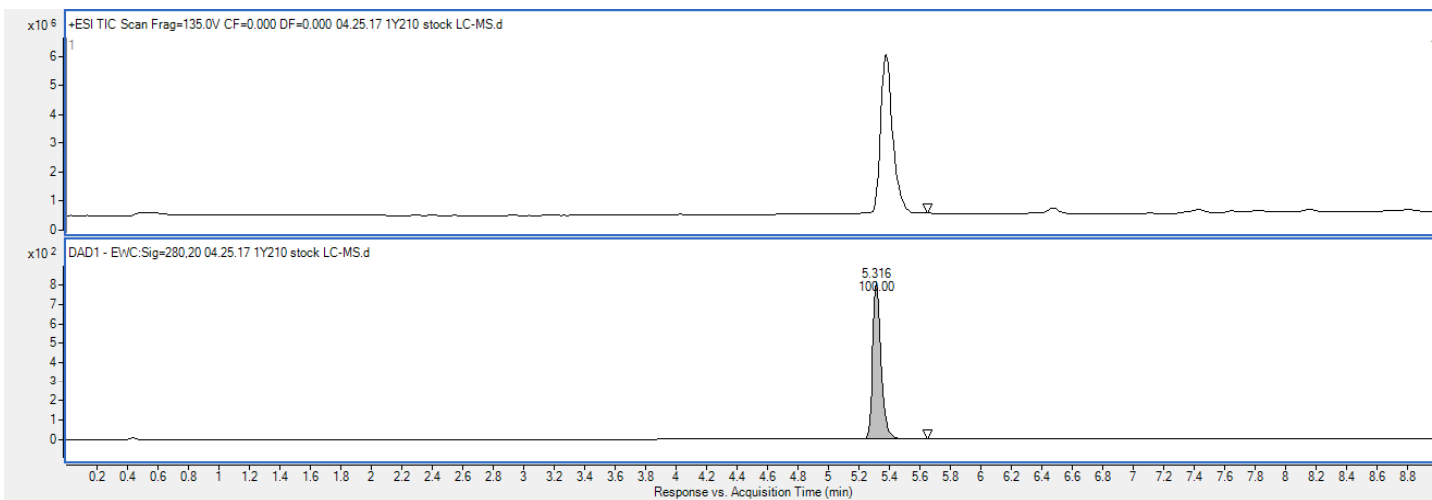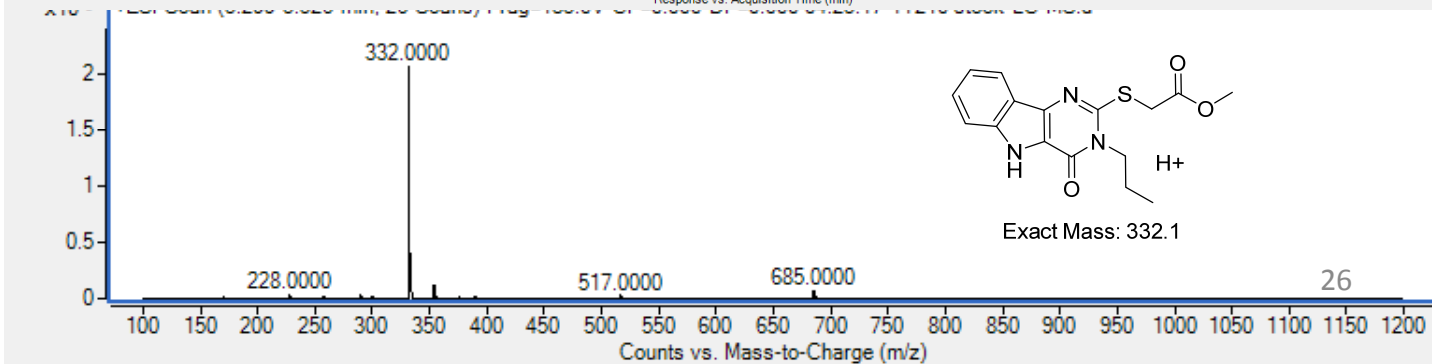

# <sup>1</sup>H NMR, LC-MS

## 6{7,1}

4/6/2017 4:50:00 PM

| Acquisition Time (sec) | 2.0081      | Comment        | STANDARD 1H OBSERVE                                                      |                      |         | Date                   | Mar 24 2017         |
|------------------------|-------------|----------------|--------------------------------------------------------------------------|----------------------|---------|------------------------|---------------------|
| Date Stamp             | Mar 24 2017 | File Name      | C:\Documents and Settings\Mycoahhh\My Documents\NMR\michan\2b125.fid\fid |                      |         |                        |                     |
| Frequency (MHz)        | 399.91      | Nucleus        | 1H                                                                       | Number of Transients | 16      | Original Points Count  | 16052               |
| Points Count           | 16384       | Pulse Sequence | s2pul                                                                    | Receiver Gain        | 30.00   | Solvent                | DMSO-d6             |
| Spectrum Offset (Hz)   | 2030.9700   | Spectrum Type  | STANDARD                                                                 | Sweep Width (Hz)     | 7993.60 | Temperature (degree C) | AMBIENT TEMPERATURE |

<sup>1</sup>H NMR (400 MHz, DMSO-d<sub>6</sub>) δ 12.00 (s, 1H), 7.85 (d, *J* = 7.81 Hz, 1H), 7.49 (t, *J* = 8.30 Hz, 1H), 7.44 (d, *J* = 8.29 Hz, 1H), 7.23 (t, *J* = 7.30 Hz, 1H), 4.19 (s, 2H), 4.14 (t, *J* = 7.80 Hz, 2H), 3.72 (s, 3H), 1.73 (quin, *J* = 7.30 Hz, 2H), 1.42 (sxt, *J* = 7.80 Hz, 2H), 0.96 (t, *J* = 7.32 Hz, 3H)

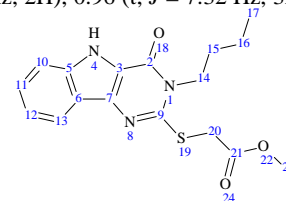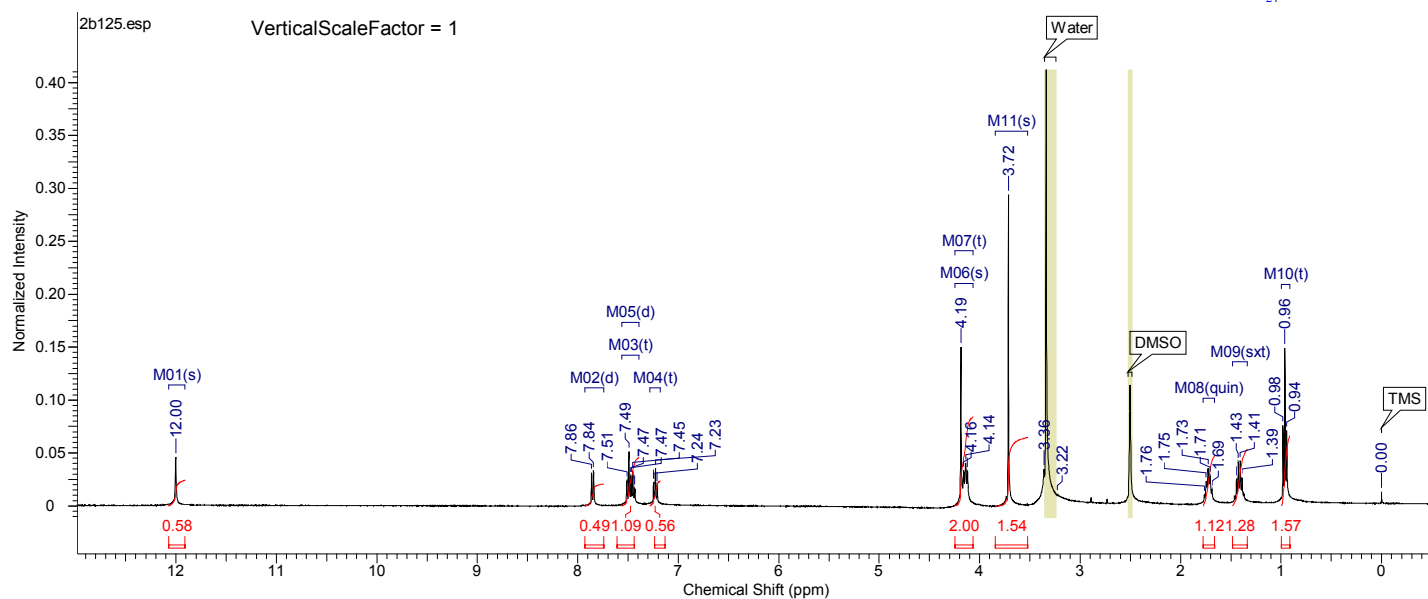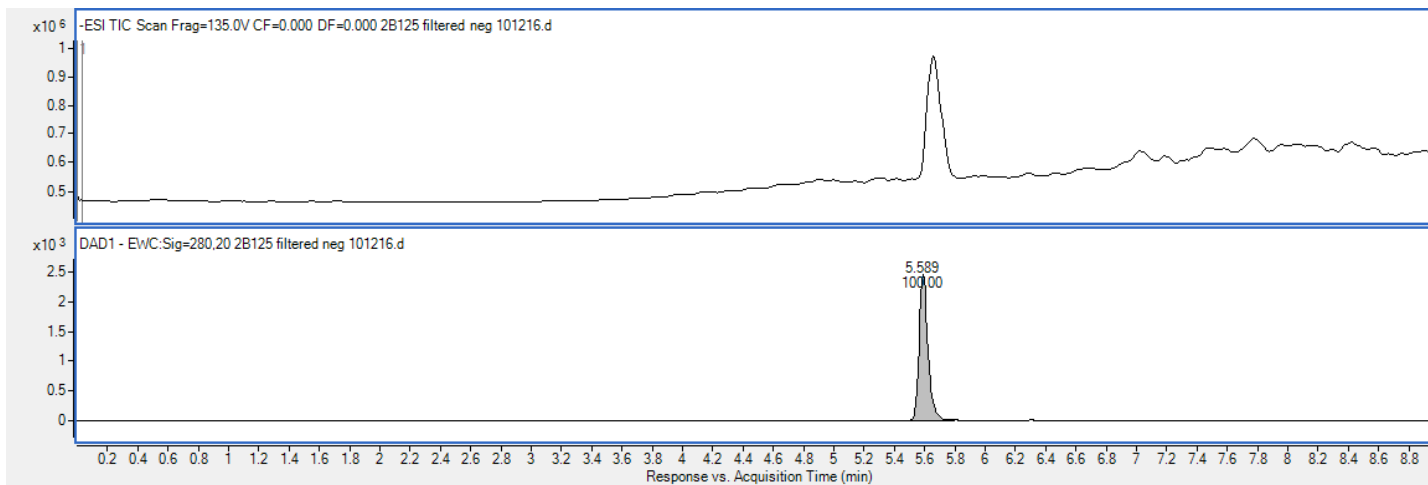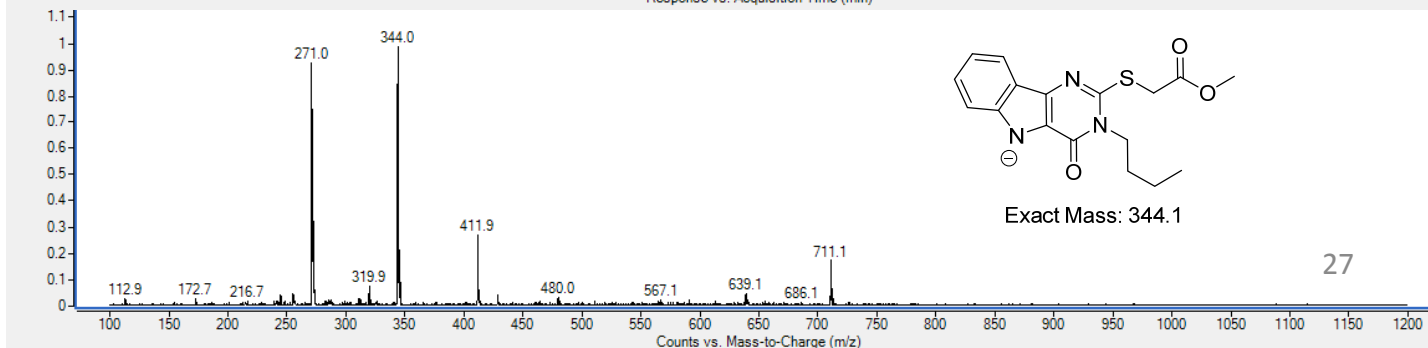

# <sup>1</sup>H NMR, LC-MS

# 6{1,2}

4/25/2017 10:05:56 AM

|                        |             |                |                                                                        |                      |         |                        |                     |
|------------------------|-------------|----------------|------------------------------------------------------------------------|----------------------|---------|------------------------|---------------------|
| Acquisition Time (sec) | 2.0162      | Comment        | STANDARD 1H OBSERVE                                                    |                      | Date    | Mar 24 2017            |                     |
| Date Stamp             | Mar 24 2017 | File Name      | C:\Documents and Settings\Mycoahhh\My Documents\NMR\mchan\2b97.fid\fid |                      |         |                        |                     |
| Frequency (MHz)        | 399.91      | Nucleus        | 1H                                                                     | Number of Transients | 16      | Original Points Count  | 16117               |
| Points Count           | 16384       | Pulse Sequence | s2pul                                                                  | Receiver Gain        | 30.00   | Solvent                | DMSO-d6             |
| Spectrum Offset (Hz)   | 2029.0183   | Spectrum Type  | STANDARD                                                               | Sweep Width (Hz)     | 7993.60 | Temperature (degree C) | AMBIENT TEMPERATURE |

<sup>1</sup>H NMR (400 MHz, DMSO-d<sub>6</sub>) δ 12.15 (s, 1H), 7.91 (d, *J* = 8.29 Hz, 1H), 7.42 - 7.61 (m, 6H), 7.25 (t, *J* = 7.56 Hz, 1H), 4.15 (q, *J* = 6.83 Hz, 2H), 4.03 (s, 2H), 1.23 (t, *J* = 7.07 Hz, 3H)

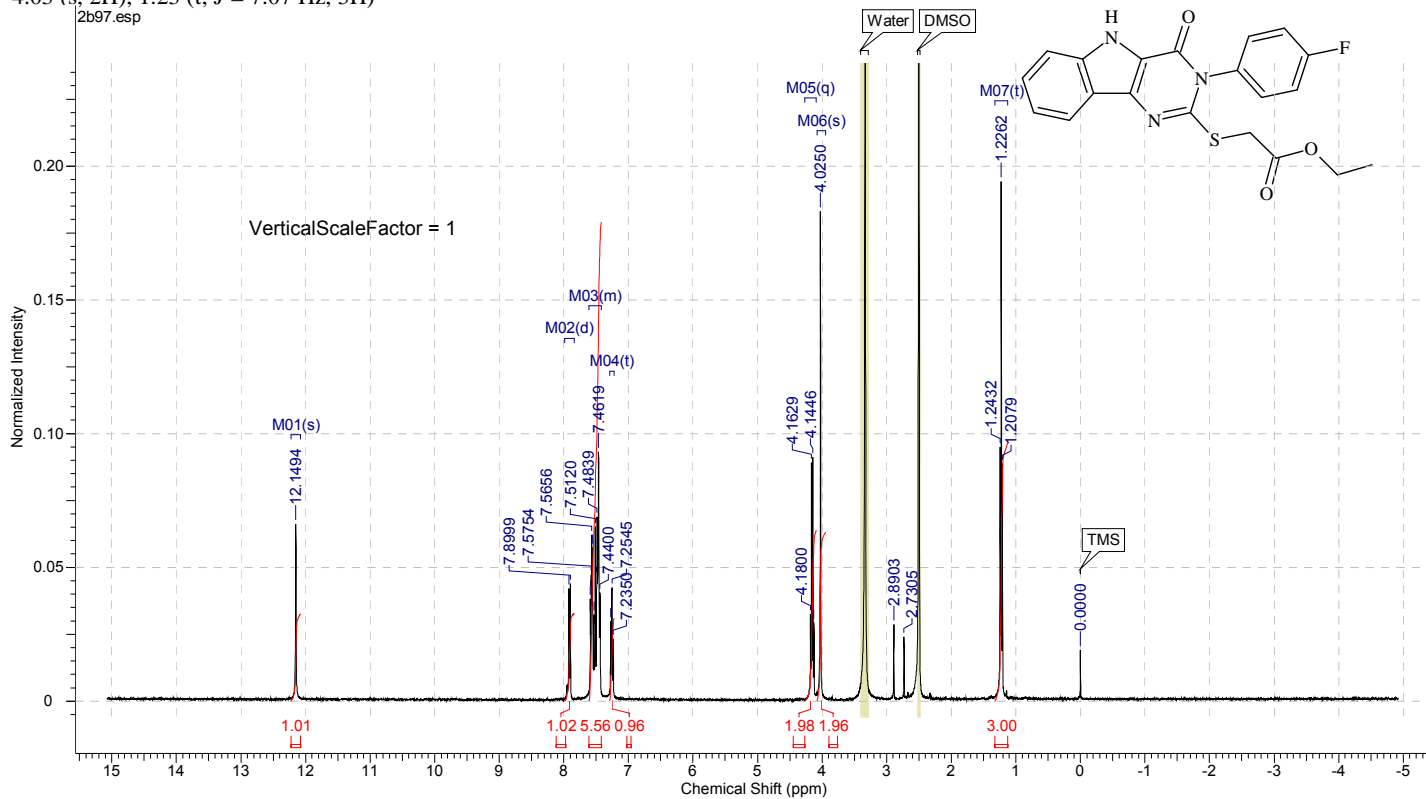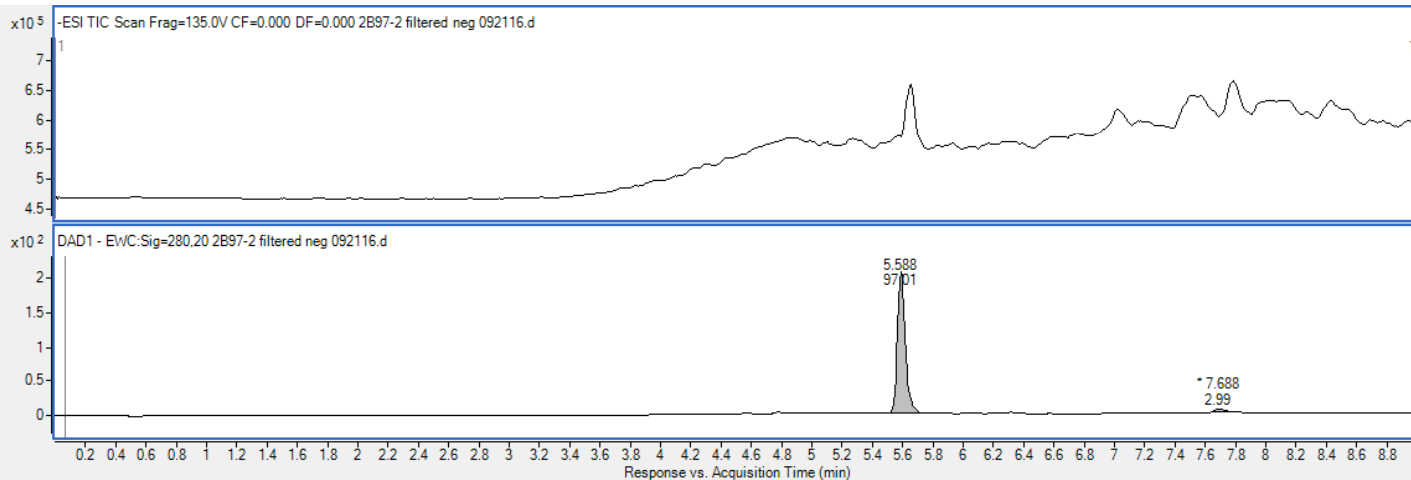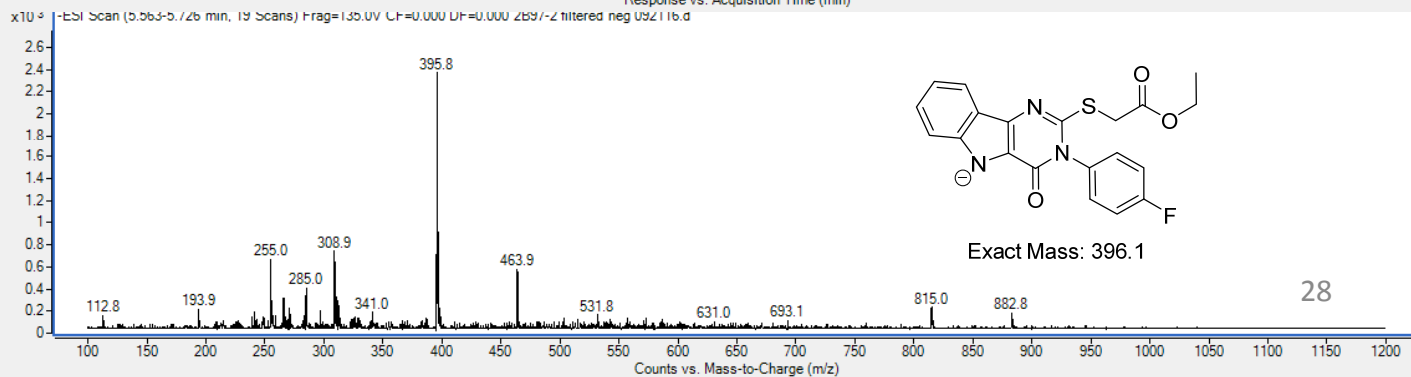

# <sup>1</sup>H NMR, LC-MS

# 6{2,2}

4/19/2017 10:30:04 AM

| Acquisition Time (sec) | 2.0292     | Comment        | STANDARD 1H OBSERVE                                                     |                      | Date    | Jan 5 2017             |                     |
|------------------------|------------|----------------|-------------------------------------------------------------------------|----------------------|---------|------------------------|---------------------|
| Date Stamp             | Jan 5 2017 | File Name      | C:\Documents and Settings\Mycoahhh\My Documents\NMR\mchan\2B102.fid\fid |                      |         |                        |                     |
| Frequency (MHz)        | 400.05     | Nucleus        | 1H                                                                      | Number of Transients | 16      | Original Points Count  | 16221               |
| Points Count           | 16384      | Pulse Sequence | s2pul                                                                   | Receiver Gain        | 14.00   | Solvent                | DMSO-d6             |
| Spectrum Offset (Hz)   | 1967.0524  | Spectrum Type  | STANDARD                                                                | Sweep Width (Hz)     | 7993.60 | Temperature (degree C) | AMBIENT TEMPERATURE |

<sup>1</sup>H NMR (400 MHz, DMSO-d<sub>6</sub>) δ 12.12 (s, 1H), 7.91 (d, *J* = 7.81 Hz, 1H), 7.47 (t, *J* = 7.60 Hz, 1H), 7.52 (d, *J* = 8.30 Hz, 1H), 7.38 (d, *J* = 7.81 Hz, 2H), 7.25 (t, *J* = 6.80 Hz, 1H), 7.14 (d, *J* = 8.29 Hz, 2H), 4.15 (q, *J* = 6.83 Hz, 2H), 4.00 (s, 2H), 3.87 (s, 3H), 1.22 (t, *J* = 6.83 Hz, 3H)

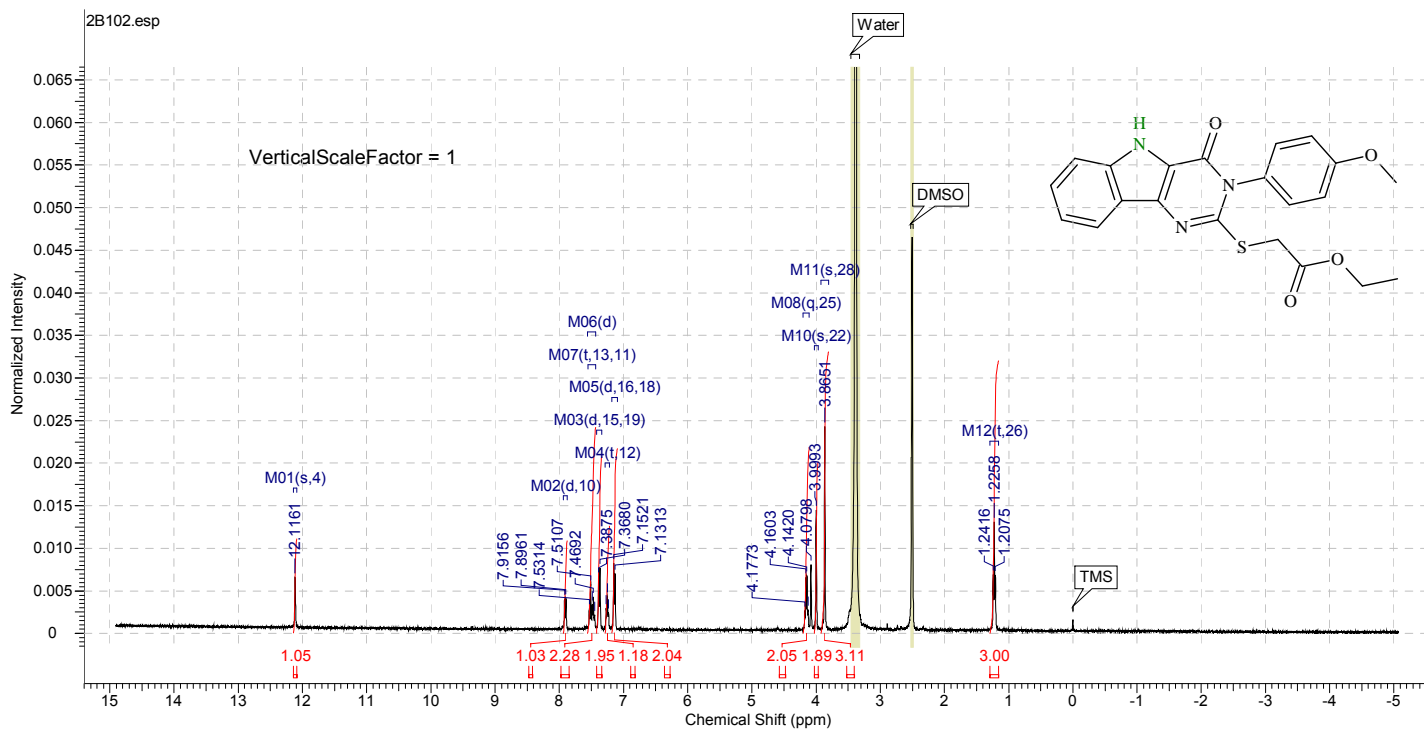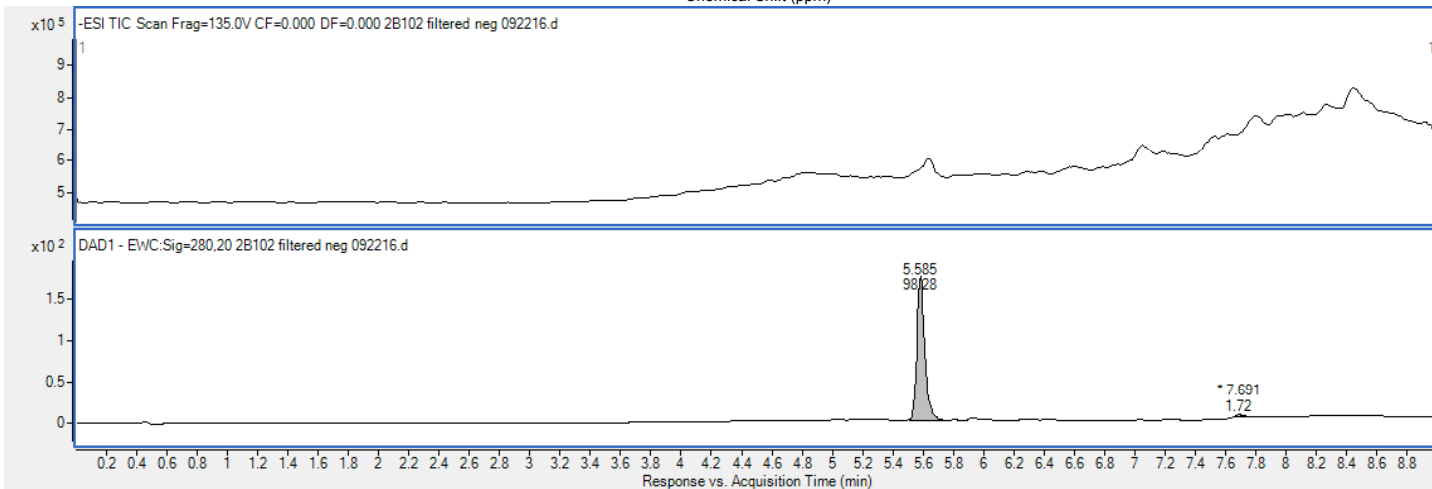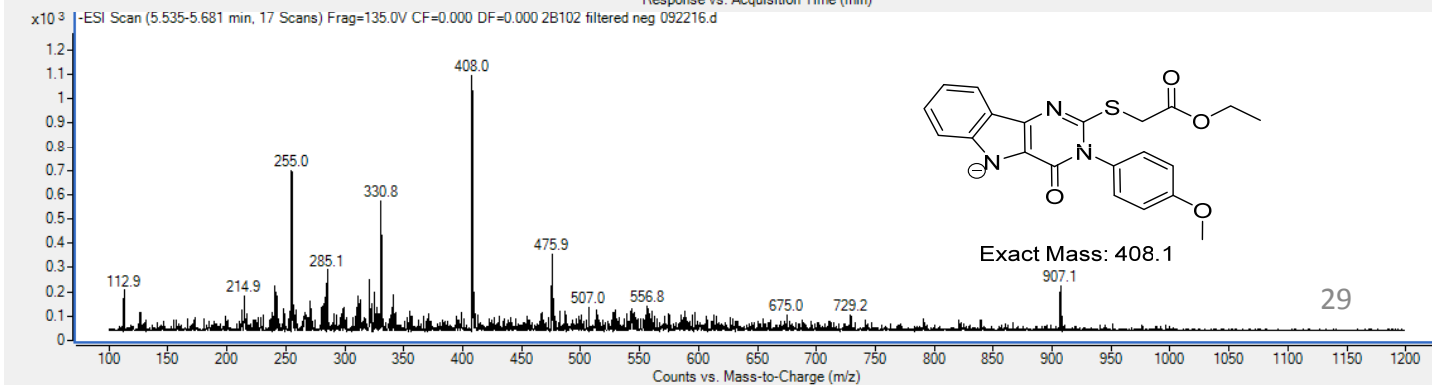

# <sup>1</sup>H NMR, LC-MS

## 6{3,2}

4/19/2017 10:46:23 AM

|                        |            |                |                                                                        |                      |         |                        |                     |
|------------------------|------------|----------------|------------------------------------------------------------------------|----------------------|---------|------------------------|---------------------|
| Acquisition Time (sec) | 2.0016     | Comment        | STANDARD 1H OBSERVE                                                    |                      | Date    | Jan 5 2017             |                     |
| Date Stamp             | Jan 5 2017 | File Name      | C:\Documents and Settings\Mycoahhh\My Documents\NMR\mchan\2B91.fid\fid |                      |         |                        |                     |
| Frequency (MHz)        | 400.05     | Nucleus        | 1H                                                                     | Number of Transients | 16      | Original Points Count  | 15987               |
| Points Count           | 16384      | Pulse Sequence | s2pul                                                                  | Receiver Gain        | 20.00   | Solvent                | DMSO-d6             |
| Spectrum Offset (Hz)   | 1965.1851  | Spectrum Type  | STANDARD                                                               | Sweep Width (Hz)     | 7987.22 | Temperature (degree C) | AMBIENT TEMPERATURE |

<sup>1</sup>H NMR (400 MHz, DMSO-d<sub>6</sub>) δ 11.91 (s, 1H), 7.83 (d, *J* = 7.80 Hz, 1H), 7.43 (t, *J* = 7.60 Hz, 1H), 7.49 (d, *J* = 8.30 Hz, 1H), 7.21 (t, *J* = 7.56 Hz, 1H), 4.52 - 4.78 (m, 1H), 4.13 (s, 2H), 4.14 (q, *J* = 7.30 Hz, 2H), 1.65 (d, *J* = 6.83 Hz, 6H), 1.21 (t, *J* = 7.07 Hz, 3H)

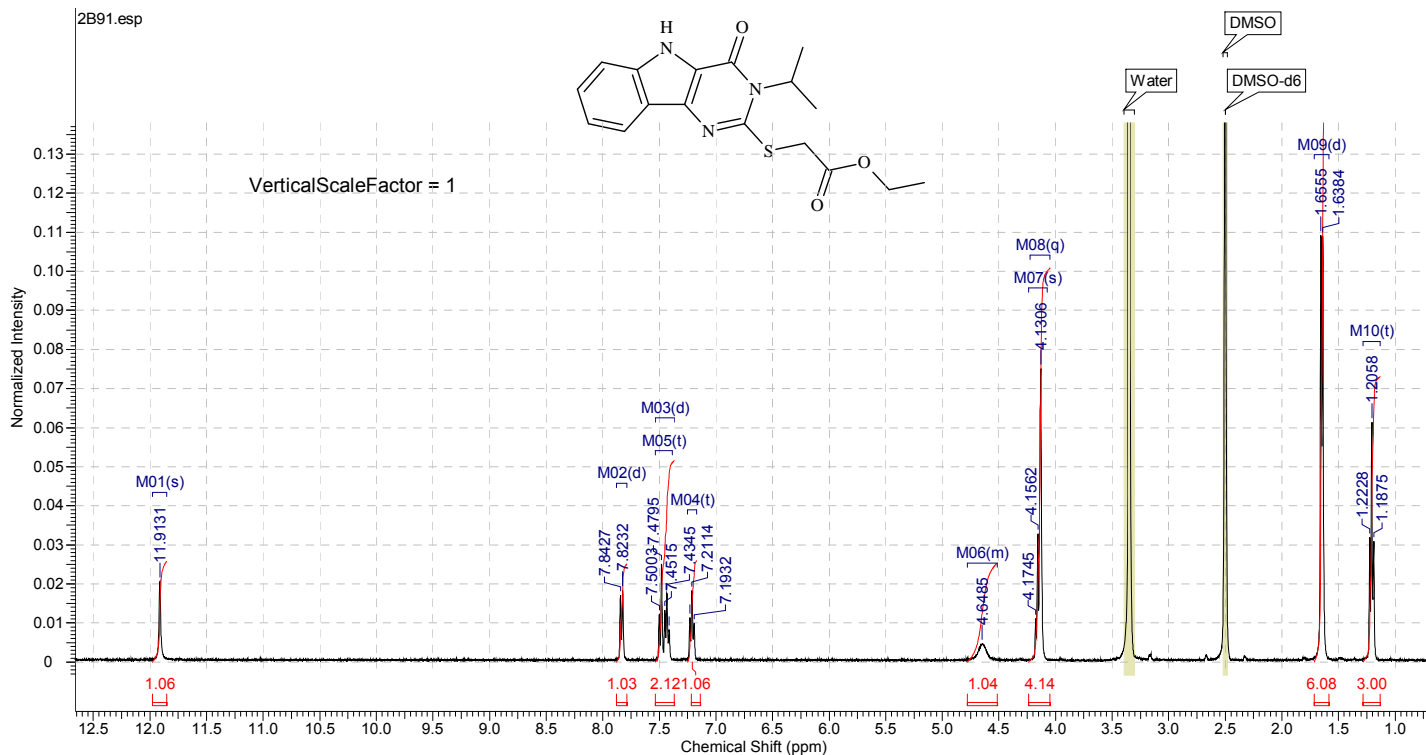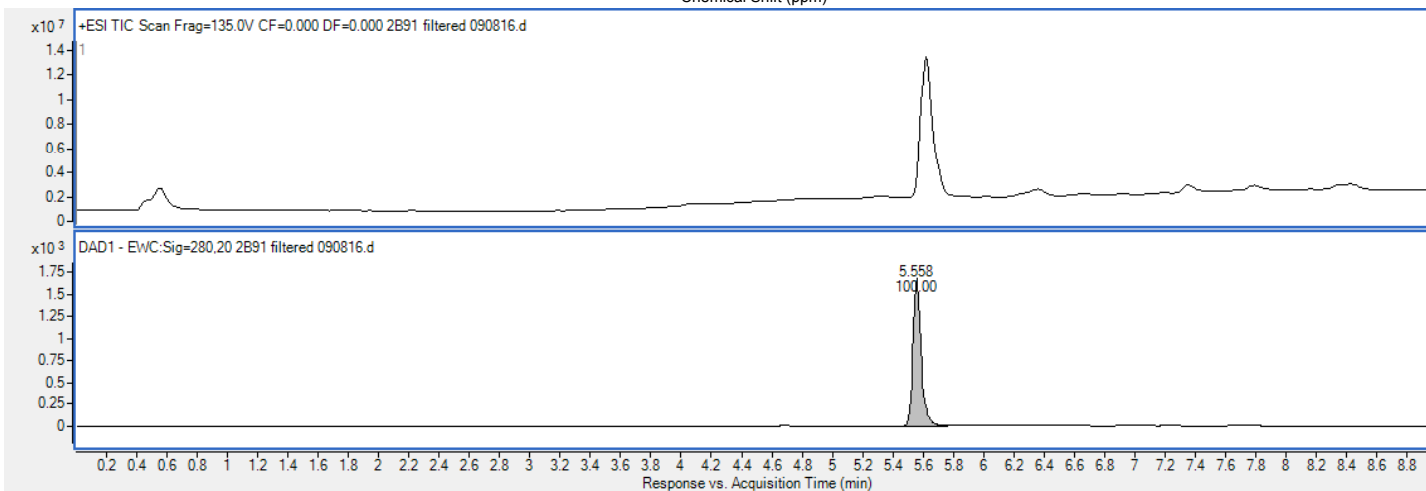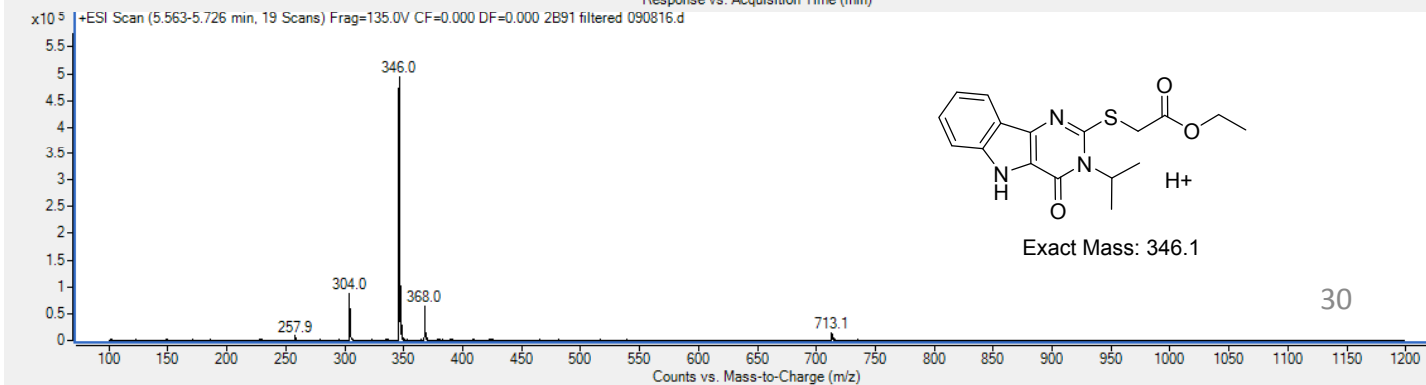

# <sup>1</sup>H NMR, LC-MS

# 6{4,2}

4/19/2017 11:03:45 AM

|                        |            |                |                                                                         |                      |         |                        |                     |
|------------------------|------------|----------------|-------------------------------------------------------------------------|----------------------|---------|------------------------|---------------------|
| Acquisition Time (sec) | 2.0032     | Comment        | STANDARD 1H OBSERVE                                                     |                      | Date    | Jan 5 2017             |                     |
| Date Stamp             | Jan 5 2017 | File Name      | C:\Documents and Settings\Mycoahhh\My Documents\NMR\michan\2B52.fid\fid |                      |         |                        |                     |
| Frequency (MHz)        | 400.05     | Nucleus        | 1H                                                                      | Number of Transients | 16      | Original Points Count  | 16013               |
| Points Count           | 16384      | Pulse Sequence | s2pul                                                                   | Receiver Gain        | 20.00   | Solvent                | DMSO-d6             |
| Spectrum Offset (Hz)   | 1956.6102  | Spectrum Type  | STANDARD                                                                | Sweep Width (Hz)     | 7993.60 | Temperature (degree C) | AMBIENT TEMPERATURE |

<sup>1</sup>H NMR (400 MHz, DMSO-d<sub>6</sub>) δ 12.00 (s, 1H), 7.84 (d, *J* = 7.81 Hz, 1H), 7.46 (t, *J* = 8.30 Hz, 1H), 7.42 (d, *J* = 8.30 Hz, 1H), 7.20 (t, *J* = 7.60 Hz, 1H), 4.15 (s, 2H), 4.14 (q, *J* = 7.10 Hz, 2H), 3.59 (s, 3H), 1.20 (t, *J* = 7.07 Hz, 3H)

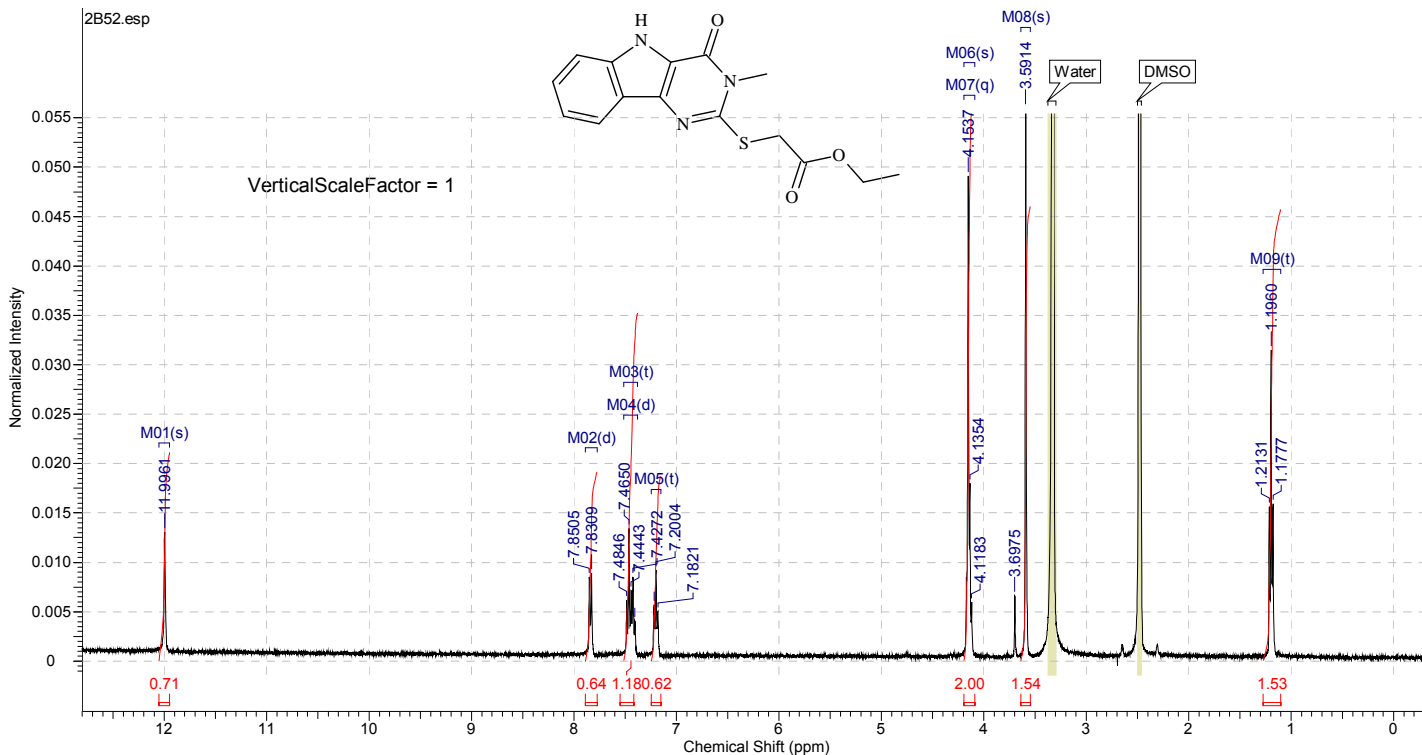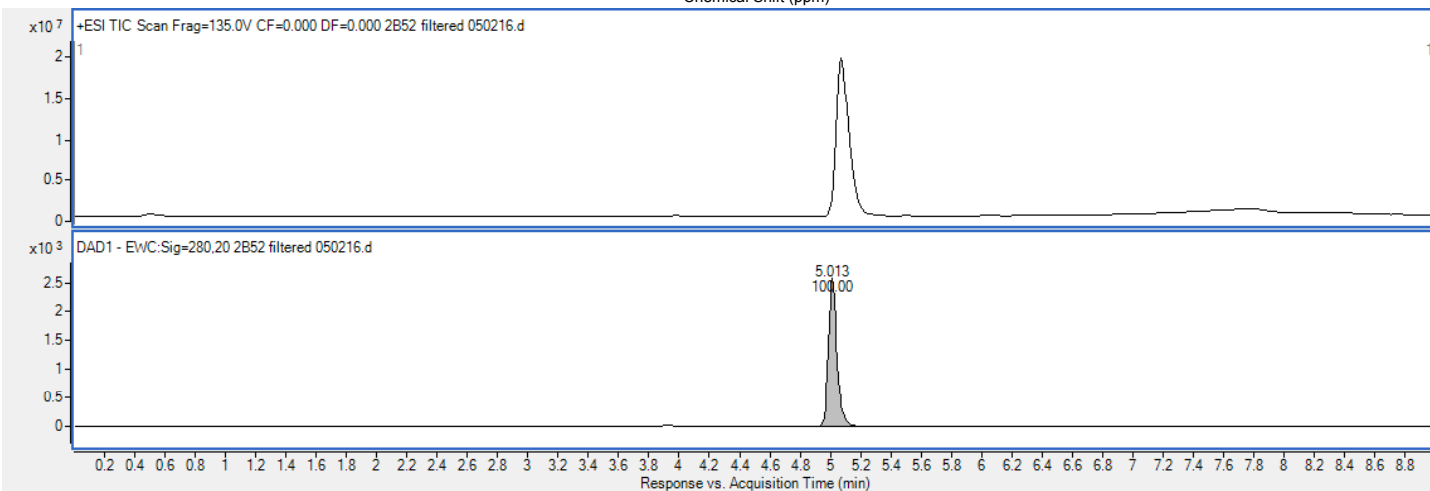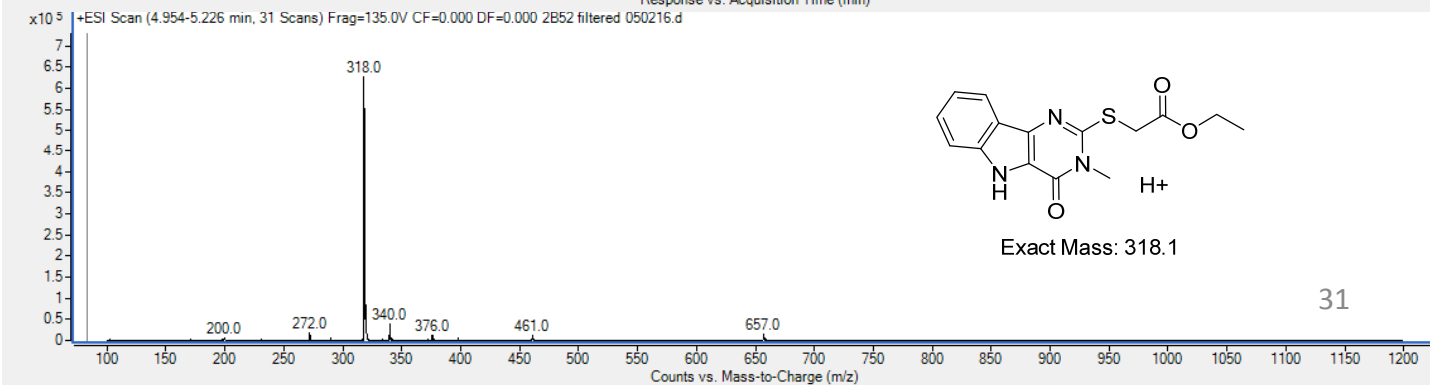

# <sup>1</sup>H NMR, LC-MS

## 6{5,2}

4/19/2017 11:22:14 AM

| Acquisition Time (sec) | 2.0341     | Comment        | STANDARD 1H OBSERVE                                                     |                      | Date    | Jan 5 2017             |                     |
|------------------------|------------|----------------|-------------------------------------------------------------------------|----------------------|---------|------------------------|---------------------|
| Date Stamp             | Jan 5 2017 | File Name      | C:\Documents and Settings\Mycoahhh\My Documents\NMR\mchan\1Y228.fid\fid |                      |         |                        |                     |
| Frequency (MHz)        | 400.05     | Nucleus        | 1H                                                                      | Number of Transients | 16      | Original Points Count  | 16260               |
| Points Count           | 16384      | Pulse Sequence | s2pul                                                                   | Receiver Gain        | 16.00   | Solvent                | DMSO-d6             |
| Spectrum Offset (Hz)   | 1956.6102  | Spectrum Type  | STANDARD                                                                | Sweep Width (Hz)     | 7993.60 | Temperature (degree C) | AMBIENT TEMPERATURE |

<sup>1</sup>H NMR (400 MHz, DMSO-d<sub>6</sub>) δ 11.99 (br. s., 1H), 7.84 (d, *J* = 7.32 Hz, 1H), 7.43 (t, *J* = 7.30 Hz, 1H), 7.48 (d, *J* = 8.29 Hz, 1H), 7.20 (t, *J* = 6.80 Hz, 1H), 4.00 - 4.22 (m, 6H), 1.31 (t, *J* = 7.30 Hz, 3H), 1.18 (t, *J* = 6.80 Hz, 3H)

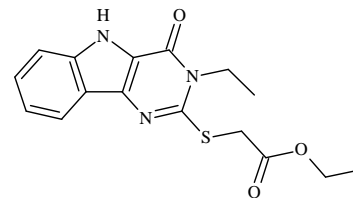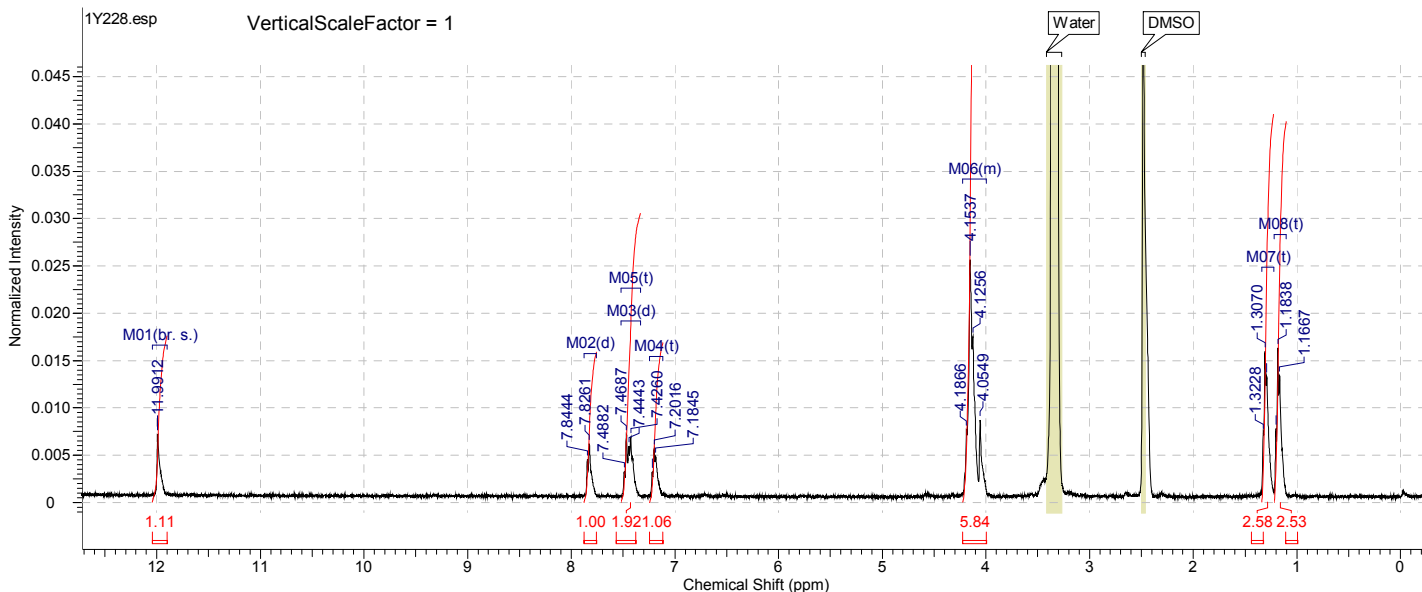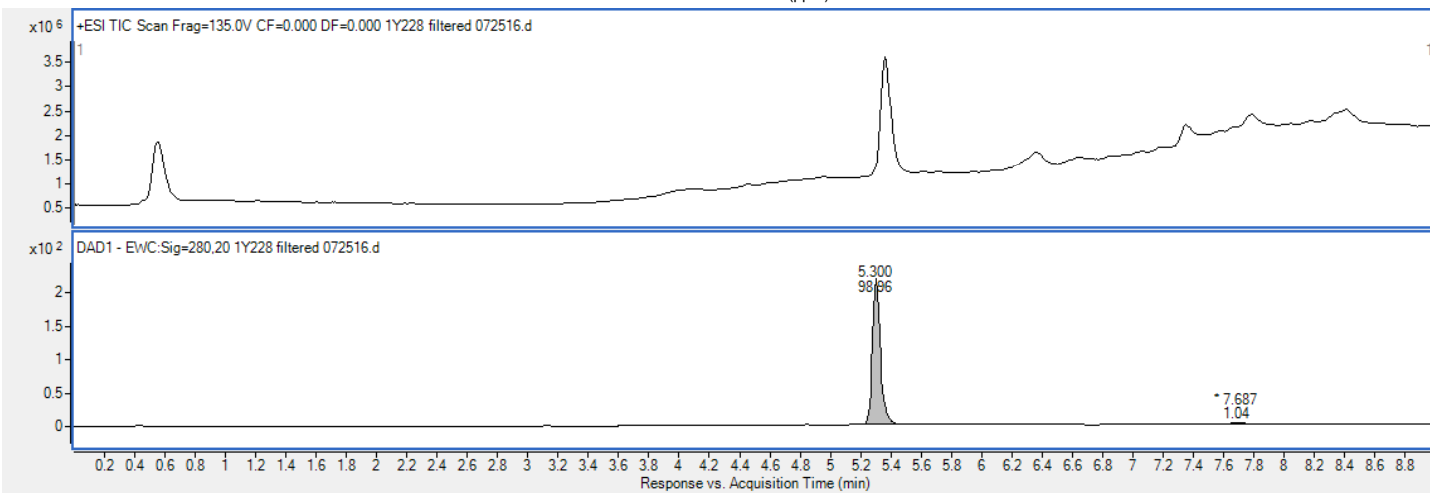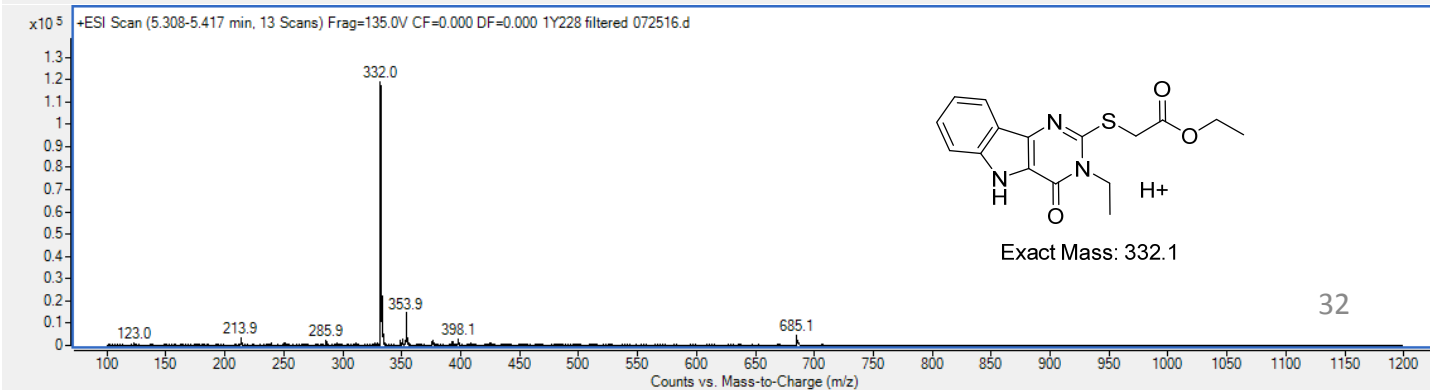



# <sup>1</sup>H NMR, LC-MS

## 6{6,2}

4/19/2017 2:49:23 PM

| Acquisition Time (sec) | 2.0325     | Comment        | STANDARD 1H OBSERVE                                                     |                      |         | Date                   | Jan 5 2017          |
|------------------------|------------|----------------|-------------------------------------------------------------------------|----------------------|---------|------------------------|---------------------|
| Date Stamp             | Jan 5 2017 | File Name      | C:\Documents and Settings\Mycoahhh\My Documents\NMR\mchan\1Y229.fid\fid |                      |         |                        |                     |
| Frequency (MHz)        | 400.05     | Nucleus        | 1H                                                                      | Number of Transients | 16      | Original Points Count  | 16247               |
| Points Count           | 16384      | Pulse Sequence | s2pul                                                                   | Receiver Gain        | 16.00   | Solvent                | DMSO-d6             |
| Spectrum Offset (Hz)   | 1964.4928  | Spectrum Type  | STANDARD                                                                | Sweep Width (Hz)     | 7993.60 | Temperature (degree C) | AMBIENT TEMPERATURE |

<sup>1</sup>H NMR (400 MHz, DMSO-d<sub>6</sub>) δ 12.01 (br. s., 1H), 7.85 (d, *J* = 8.29 Hz, 1H), 7.50 (d, *J* = 8.30 Hz, 1H), 7.44 (t, *J* = 7.80 Hz, 1H), 7.22 (t, *J* = 7.07 Hz, 1H), 4.03 - 4.21 (m, 6H), 1.76 (q, *J* = 7.30 Hz, 2H), 1.19 (t, *J* = 7.07 Hz, 3H), 0.97 (t, *J* = 7.56 Hz, 3H)

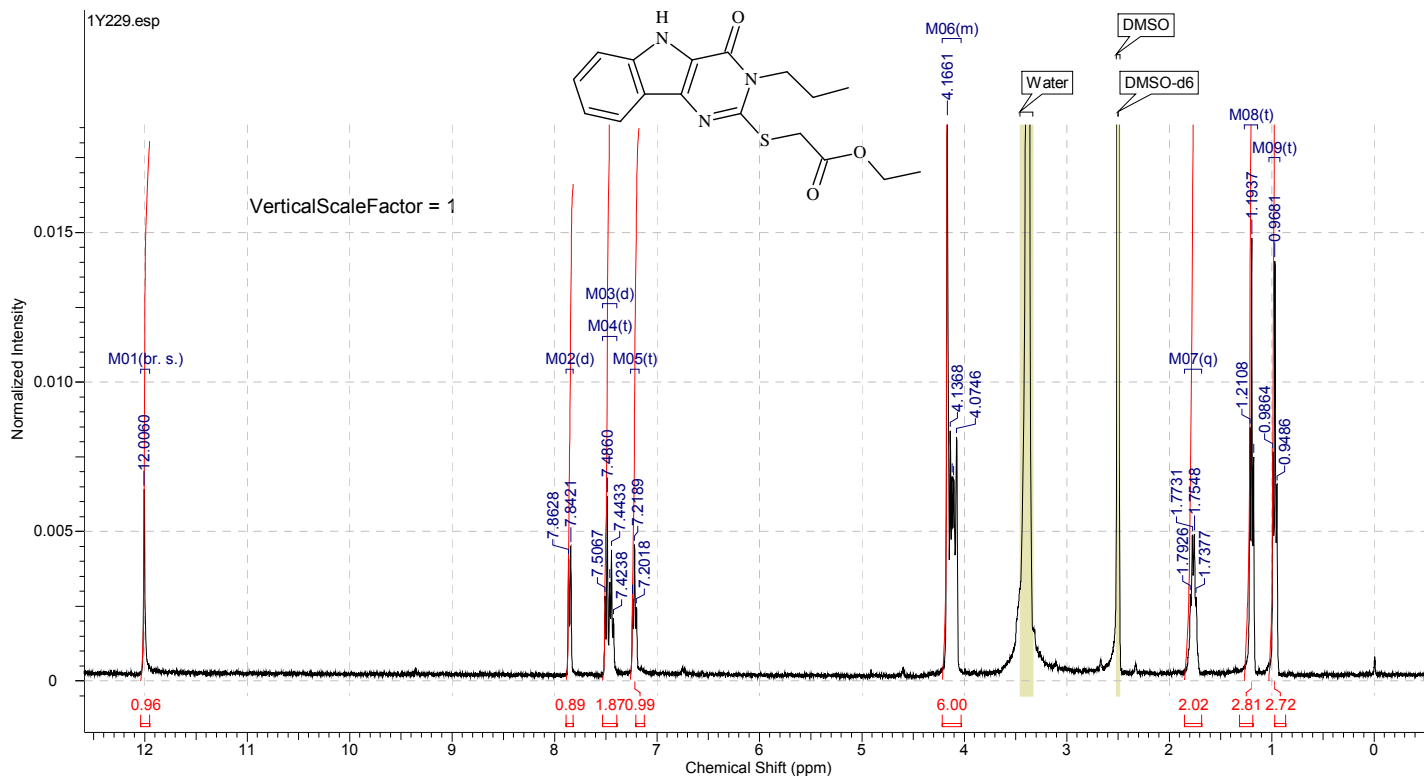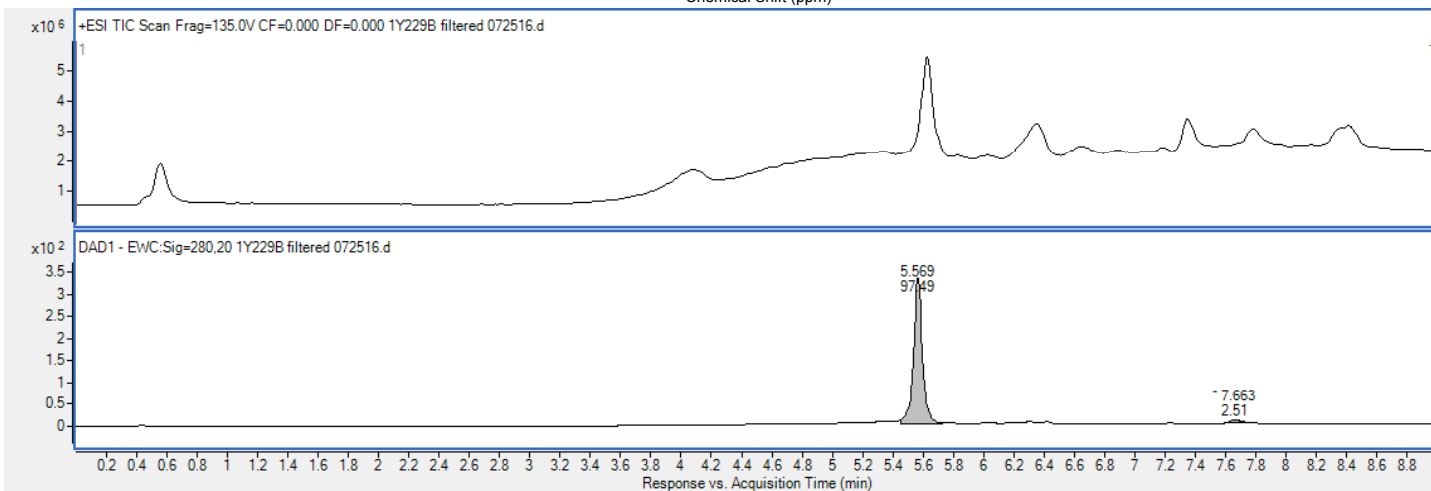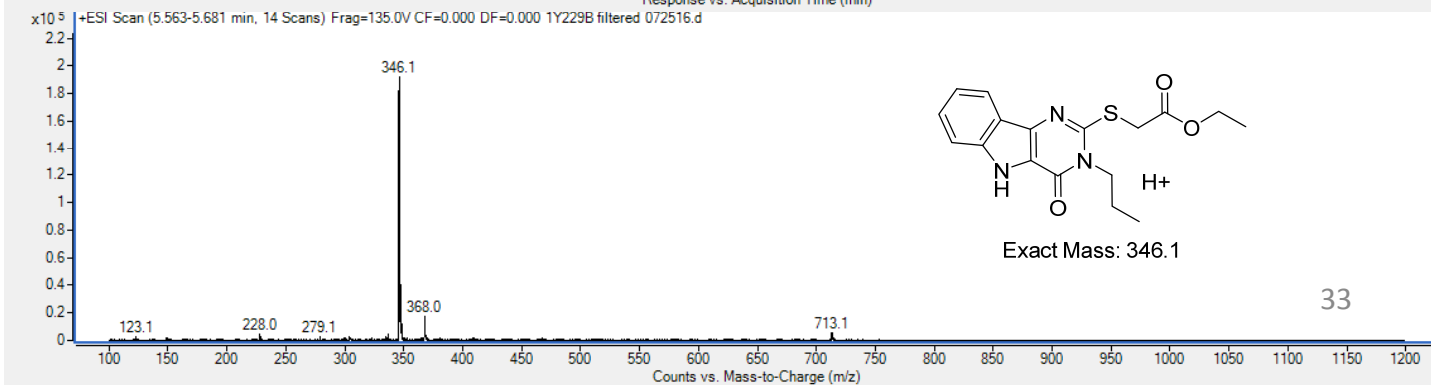

# <sup>1</sup>H NMR, LC-MS

# 6{7,2}

4/19/2017 3:01:50 PM

| Acquisition Time (sec) | 1.9983     | Comment        | STANDARD 1H OBSERVE                                                        | Date                   | Jan 5 2017          |
|------------------------|------------|----------------|----------------------------------------------------------------------------|------------------------|---------------------|
| Date Stamp             | Jan 5 2017 | File Name      | C:\Documents and Settings\Mycoahhh\My Documents\NMR\michan\2B106-2.fid\fid |                        |                     |
| Frequency (MHz)        | 400.05     | Nucleus        | 1H                                                                         | Number of Transients   | 16                  |
| Points Count           | 16384      | Pulse Sequence | s2pul                                                                      | Receiver Gain          | 20.00               |
| Spectrum Offset (Hz)   | 1963.7225  | Spectrum Type  | STANDARD                                                                   | Sweep Width (Hz)       | 7987.22             |
|                        |            |                |                                                                            | Solvent                | DMSO-d6             |
|                        |            |                |                                                                            | Temperature (degree C) | AMBIENT TEMPERATURE |

<sup>1</sup>H NMR (400 MHz, DMSO-d<sub>6</sub>) δ 12.00 (s, 1H), 7.85 (d, *J* = 8.29 Hz, 1H), 7.49 (d, *J* = 8.30 Hz, 1H), 7.44 (t, *J* = 8.30 Hz, 1H), 7.22 (t, *J* = 7.56 Hz, 1H), 4.06 - 4.23 (m, 6H), 1.72 (quin, *J* = 7.56 Hz, 2H), 1.41 (sxt, *J* = 7.41 Hz, 2H), 1.20 (t, *J* = 7.07 Hz, 3H), 0.96 (t, *J* = 7.31 Hz, 3H)

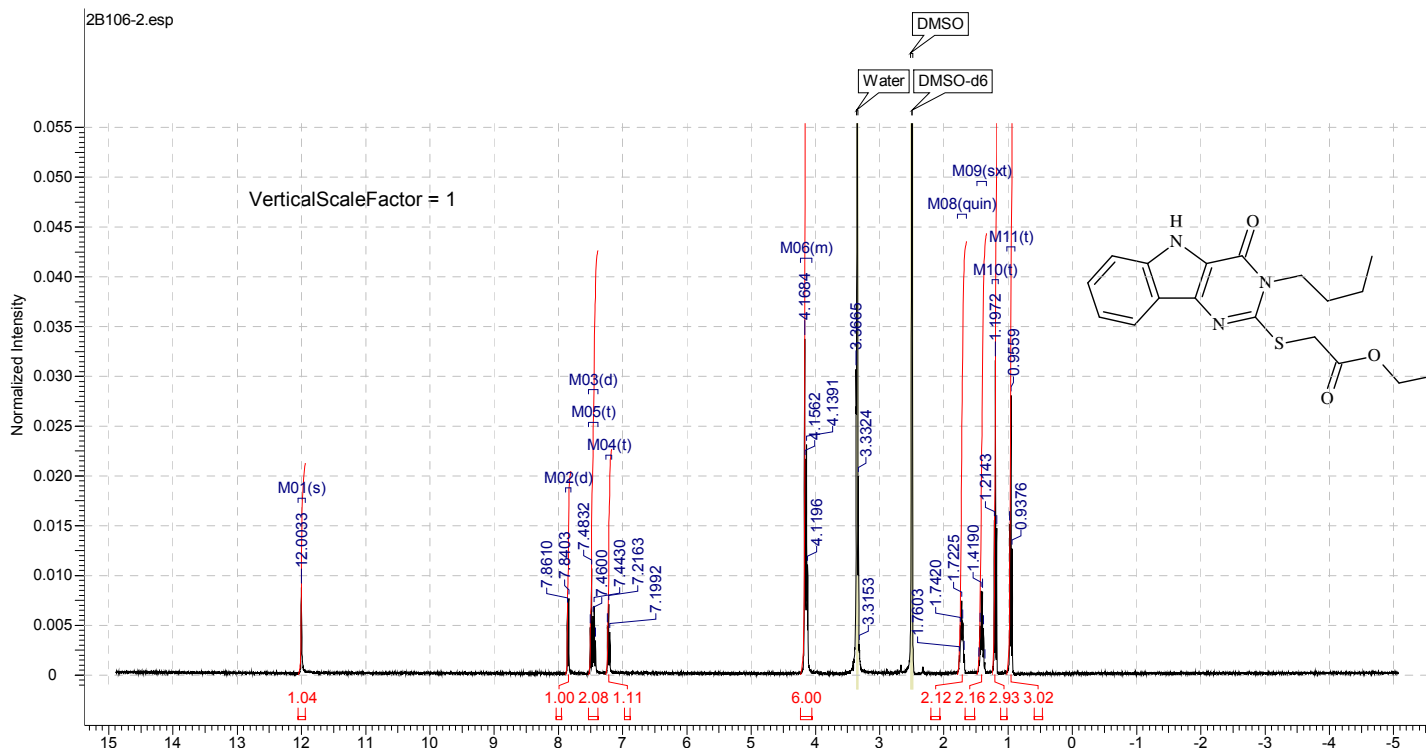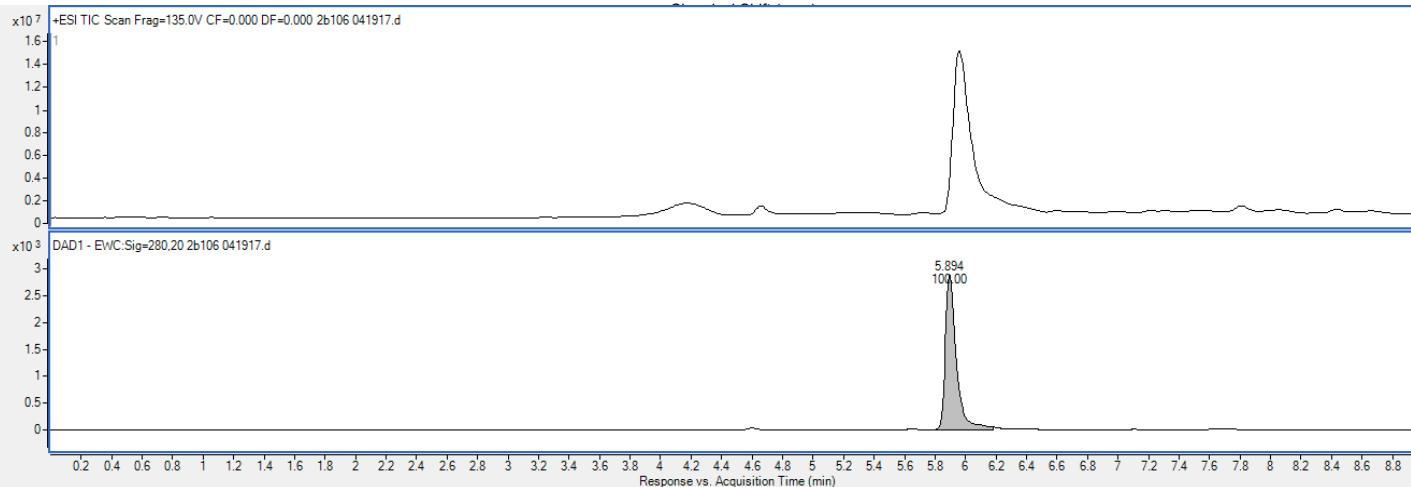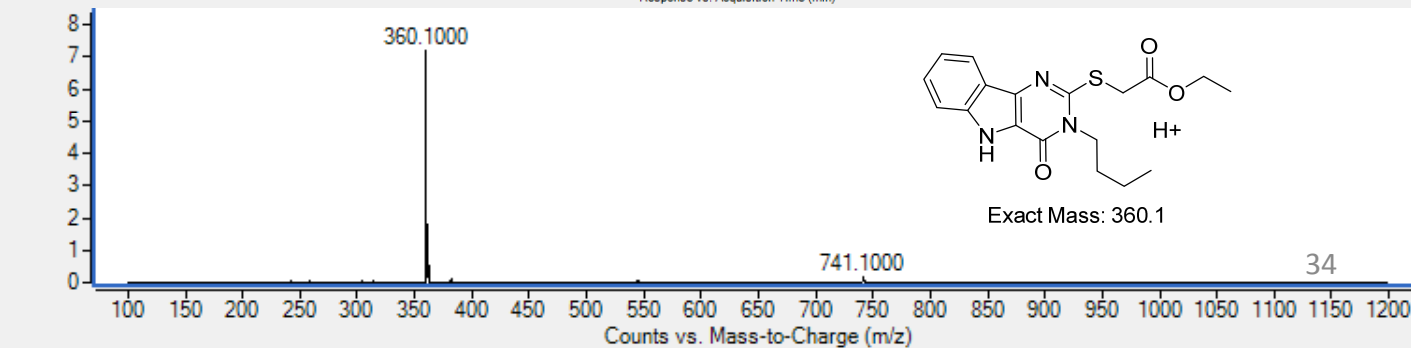

# <sup>1</sup>H NMR, LC-MS

# 6{1,3}

4/19/2017 4:06:17 PM

|                        |            |                |                                                                         |                      |         |                        |                     |
|------------------------|------------|----------------|-------------------------------------------------------------------------|----------------------|---------|------------------------|---------------------|
| Acquisition Time (sec) | 2.0097     | Comment        | STANDARD 1H OBSERVE                                                     |                      | Date    | Jan 5 2017             |                     |
| Date Stamp             | Jan 5 2017 | File Name      | C:\Documents and Settings\Mycoahhh\My Documents\NMR\mchan\2B123.fid\fid |                      |         |                        |                     |
| Frequency (MHz)        | 400.05     | Nucleus        | 1H                                                                      | Number of Transients | 16      | Original Points Count  | 16065               |
| Points Count           | 16384      | Pulse Sequence | s2pul                                                                   | Receiver Gain        | 20.00   | Solvent                | DMSO-d6             |
| Spectrum Offset (Hz)   | 1964.4928  | Spectrum Type  | STANDARD                                                                | Sweep Width (Hz)     | 7993.60 | Temperature (degree C) | AMBIENT TEMPERATURE |

<sup>1</sup>H NMR (400 MHz, DMSO-d<sub>6</sub>) δ 12.15 (s, 1H), 7.95 (d, *J* = 8.29 Hz, 1H), 7.41 - 7.60 (m, 6H), 7.26 (t, *J* = 7.32 Hz, 1H), 3.92 (s, 2H), 1.40 (s, 9H)

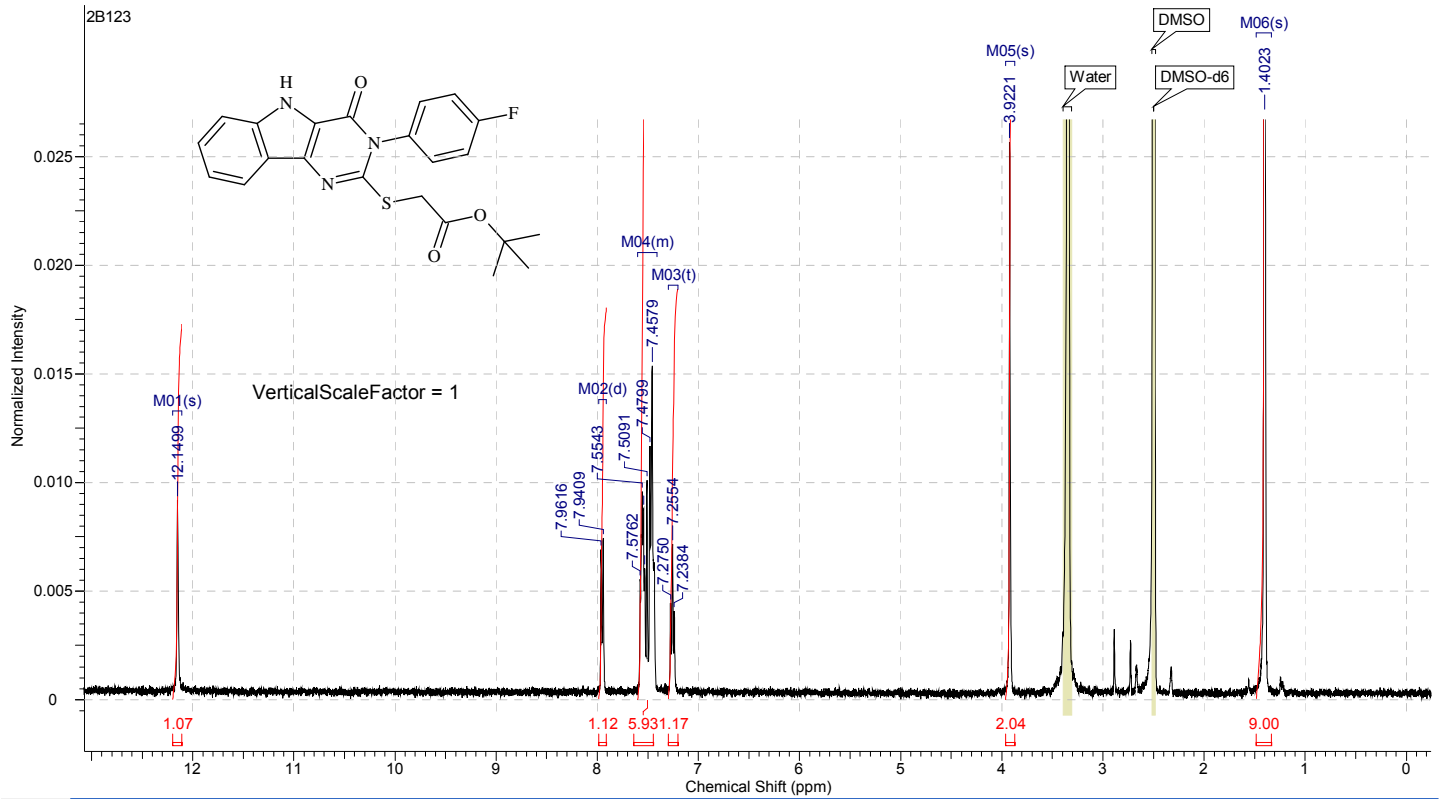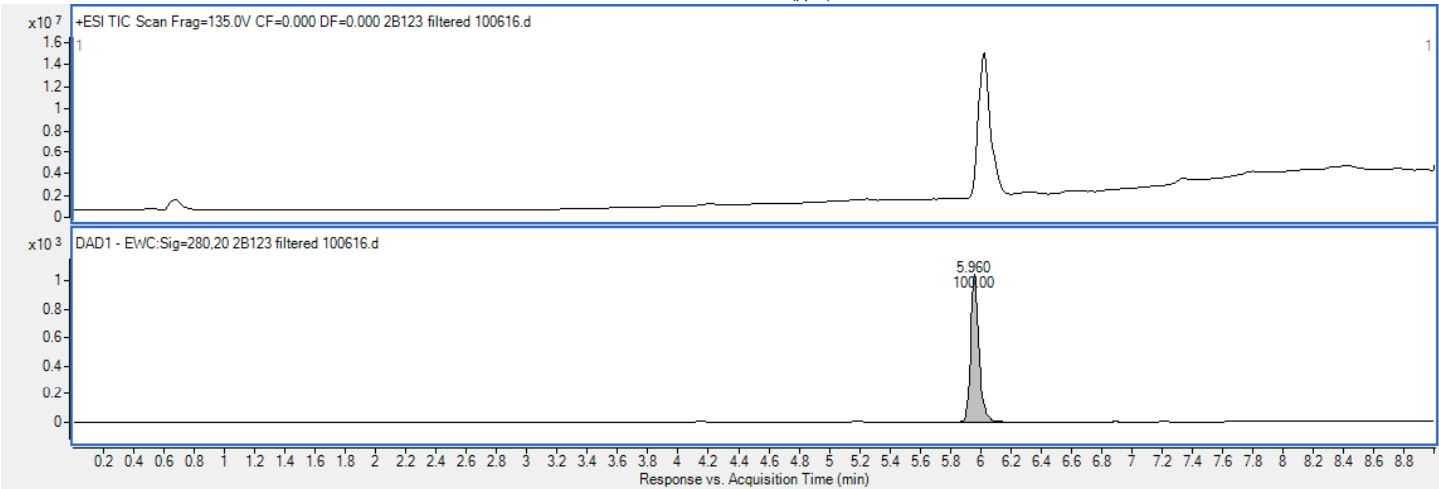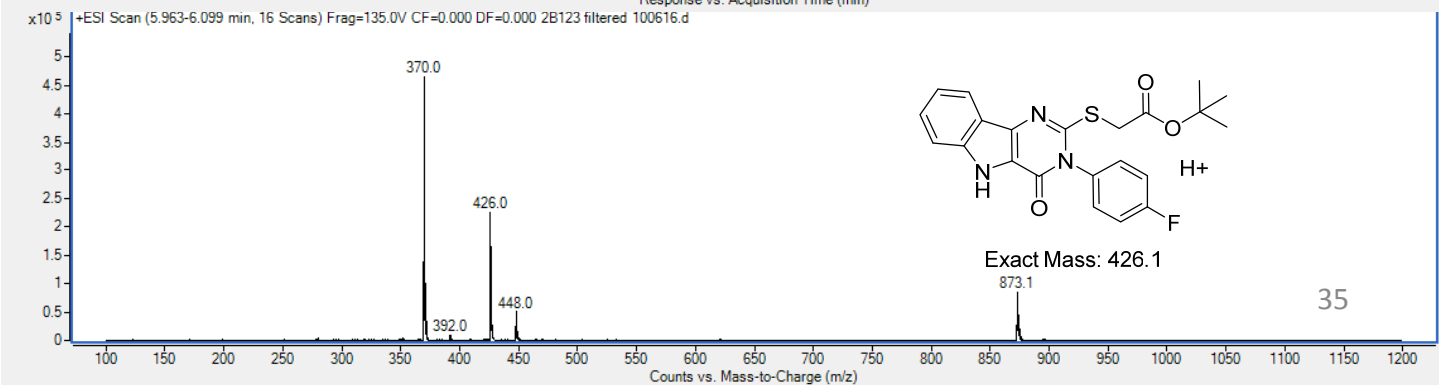

# <sup>1</sup>H NMR, LC-MS

# 6{2,3}

4/20/2017 1:55:15 PM

|                        |            |                |                                                                         |                      |         |                        |                     |
|------------------------|------------|----------------|-------------------------------------------------------------------------|----------------------|---------|------------------------|---------------------|
| Acquisition Time (sec) | 2.0146     | Comment        | STANDARD 1H OBSERVE                                                     |                      | Date    | Jan 5 2017             |                     |
| Date Stamp             | Jan 5 2017 | File Name      | C:\Documents and Settings\Mycoahhh\My Documents\NMR\mchan\2B119.fid\fid |                      |         |                        |                     |
| Frequency (MHz)        | 400.05     | Nucleus        | 1H                                                                      | Number of Transients | 16      | Original Points Count  | 16104               |
| Points Count           | 16384      | Pulse Sequence | s2pul                                                                   | Receiver Gain        | 20.00   | Solvent                | DMSO-d6             |
| Spectrum Offset (Hz)   | 1964.9807  | Spectrum Type  | STANDARD                                                                | Sweep Width (Hz)     | 7993.60 | Temperature (degree C) | AMBIENT TEMPERATURE |

<sup>1</sup>H NMR (400 MHz, DMSO-d<sub>6</sub>) δ 12.11 (s, 1H), 7.95 (d, *J* = 7.81 Hz, 1H), 7.51 (d, *J* = 8.29 Hz, 1H), 7.46 (t, *J* = 7.30 Hz, 1H), 7.37 (d, *J* = 8.29 Hz, 2H), 7.25 (t, *J* = 7.07 Hz, 1H), 7.14 (d, *J* = 8.78 Hz, 2H), 3.90 (s, 2H), 3.86 (s, 3H), 1.40 (s, 9H)

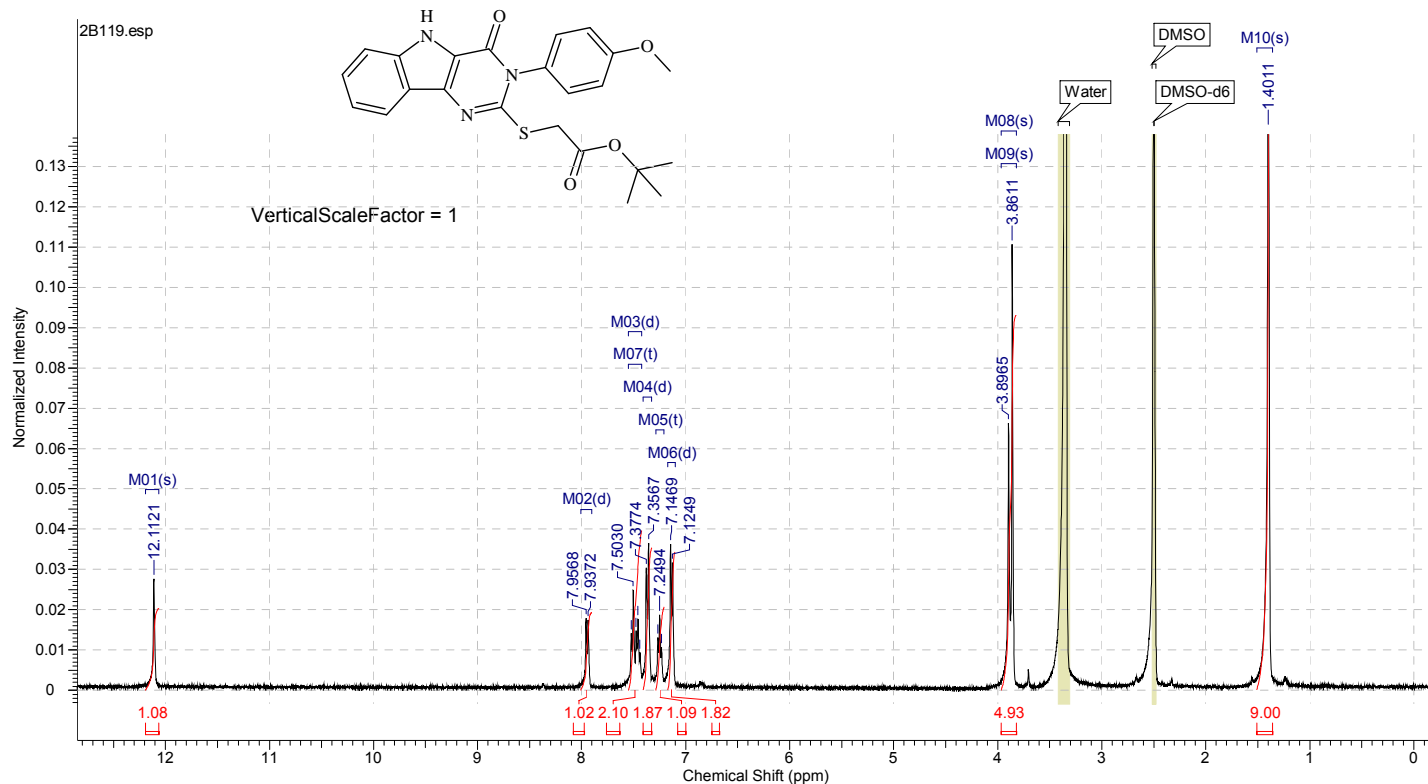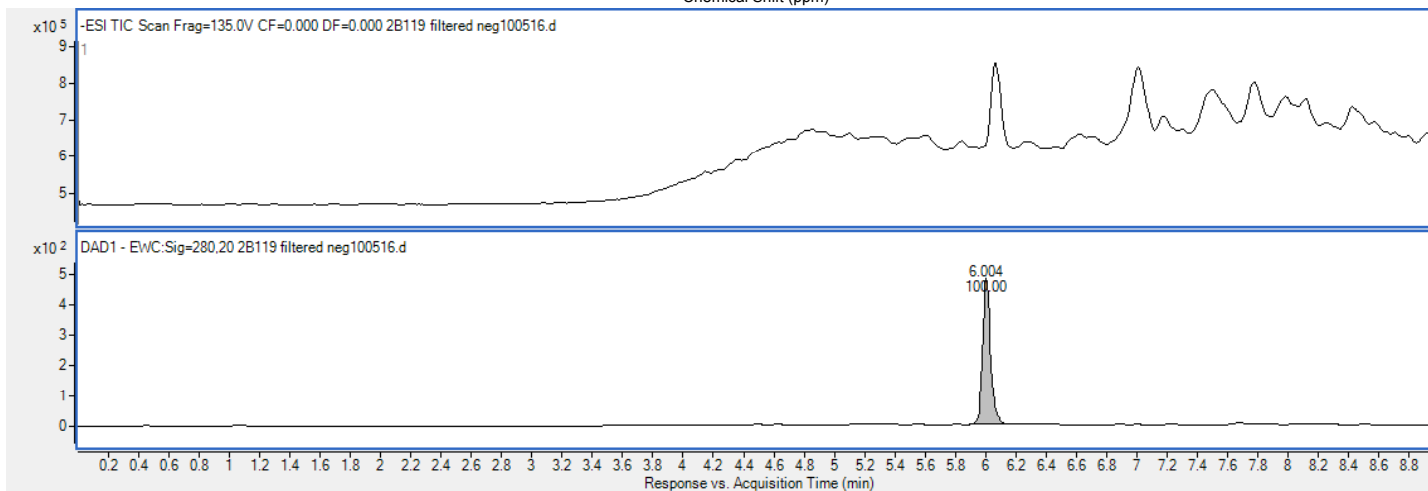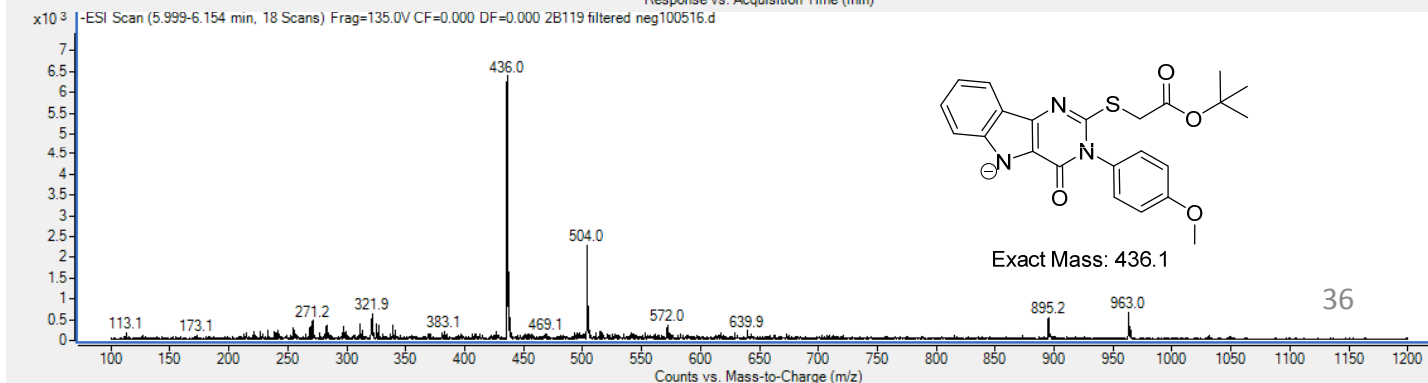

# <sup>1</sup>H NMR, LC-MS

## 6{3,3}

4/19/2017 4:11:38 PM

| Acquisition Time (sec) | 2.0227     | Comment        | STANDARD 1H OBSERVE                                                     |                      | Date    | Jan 5 2017             |                     |
|------------------------|------------|----------------|-------------------------------------------------------------------------|----------------------|---------|------------------------|---------------------|
| Date Stamp             | Jan 5 2017 | File Name      | C:\Documents and Settings\Mycoahhh\My Documents\NMR\mchan\2B117.fid\fid |                      |         |                        |                     |
| Frequency (MHz)        | 400.05     | Nucleus        | 1H                                                                      | Number of Transients | 16      | Original Points Count  | 16169               |
| Points Count           | 16384      | Pulse Sequence | s2pul                                                                   | Receiver Gain        | 20.00   | Solvent                | DMSO-d6             |
| Spectrum Offset (Hz)   | 1964.9807  | Spectrum Type  | STANDARD                                                                | Sweep Width (Hz)     | 7993.60 | Temperature (degree C) | AMBIENT TEMPERATURE |

<sup>1</sup>H NMR (400 MHz, DMSO-d<sub>6</sub>) δ 11.90 (br. s., 1H), 7.89 (d, *J* = 7.81 Hz, 1H), 7.49 (d, *J* = 8.29 Hz, 1H), 7.43 (t, *J* = 7.80 Hz, 1H), 7.22 (t, *J* = 7.32 Hz, 1H), 4.57 - 4.75 (m, 1H), 4.04 (s, 2H), 1.65 (d, *J* = 6.34 Hz, 6H), 1.37 (s, 9H)

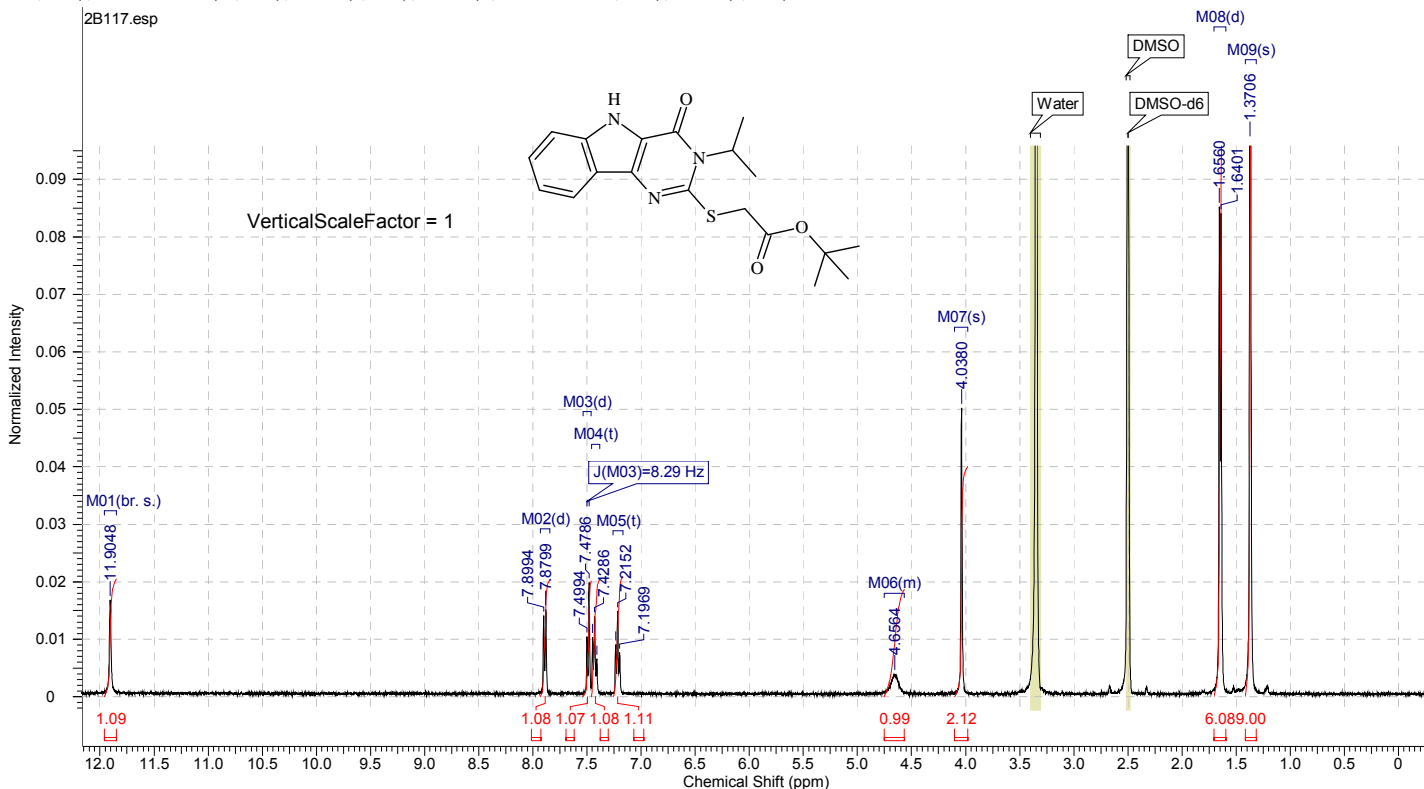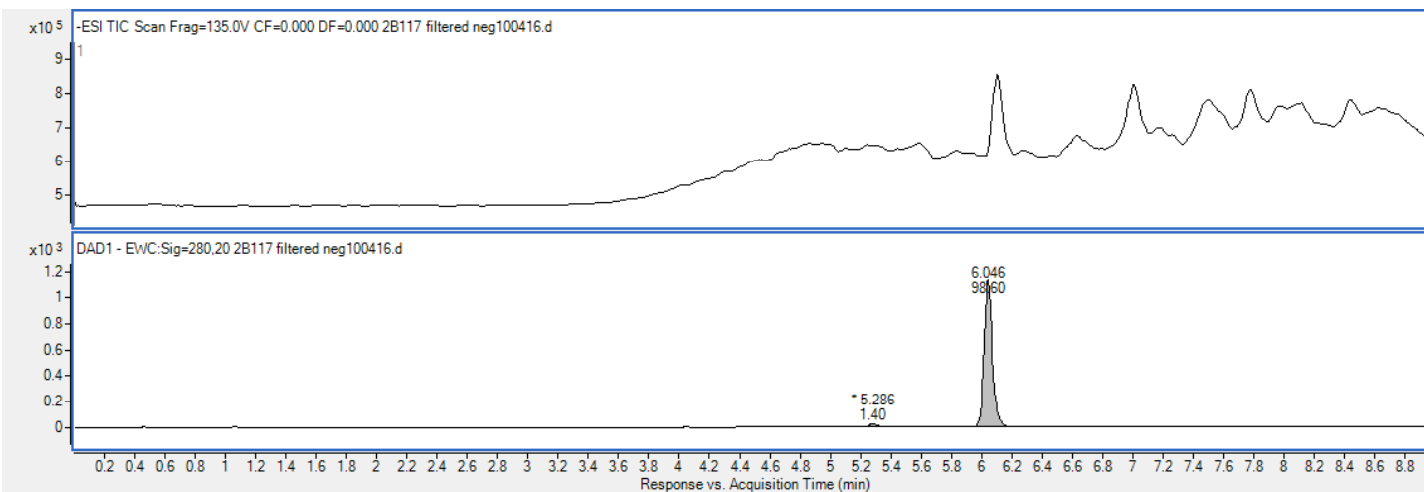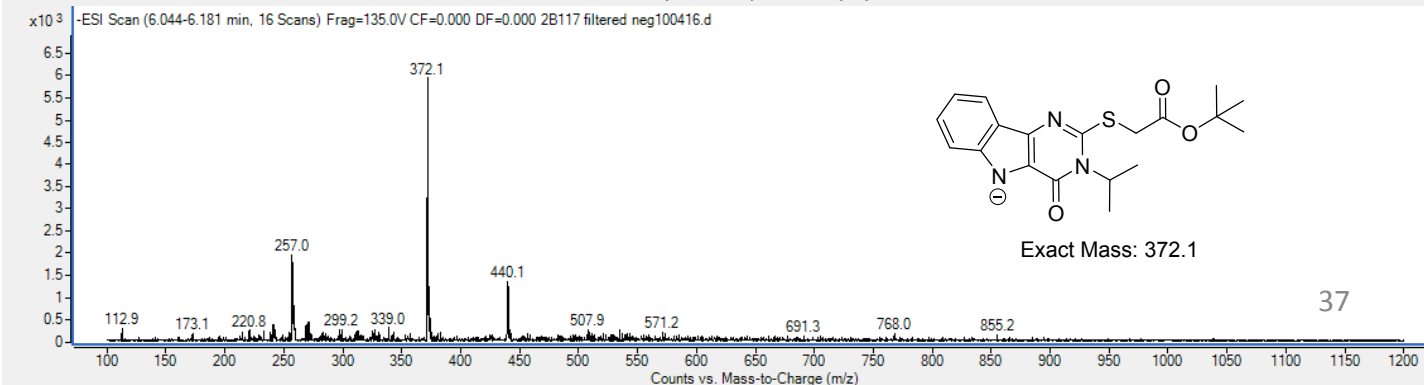

# <sup>1</sup>H NMR, LC-MS

## 6{4,3}

4/20/2017 9:50:55 AM

| Acquisition Time (sec) | 2.0179     | Comment        | STANDARD 1H OBSERVE                                                    |                      | Date    | Jan 5 2017             |                     |
|------------------------|------------|----------------|------------------------------------------------------------------------|----------------------|---------|------------------------|---------------------|
| Date Stamp             | Jan 5 2017 | File Name      | C:\Documents and Settings\Mycoahhh\My Documents\NMR\mchan\2B54.fid\fid |                      |         |                        |                     |
| Frequency (MHz)        | 400.05     | Nucleus        | 1H                                                                     | Number of Transients | 16      | Original Points Count  | 16130               |
| Points Count           | 16384      | Pulse Sequence | s2pul                                                                  | Receiver Gain        | 20.00   | Solvent                | DMSO-d6             |
| Spectrum Offset (Hz)   | 1964.4928  | Spectrum Type  | STANDARD                                                               | Sweep Width (Hz)     | 7993.60 | Temperature (degree C) | AMBIENT TEMPERATURE |

<sup>1</sup>H NMR (400 MHz, DMSO-d<sub>6</sub>) δ 12.01 (br. s., 1H), 7.92 (d, *J* = 7.81 Hz, 1H), 7.49 (d, *J* = 8.30 Hz, 1H), 7.44 (t, *J* = 7.80 Hz, 1H), 7.22 (t, *J* = 7.32 Hz, 1H), 4.08 (s, 2H), 3.61 (s, 3H), 1.41 (s, 9H)

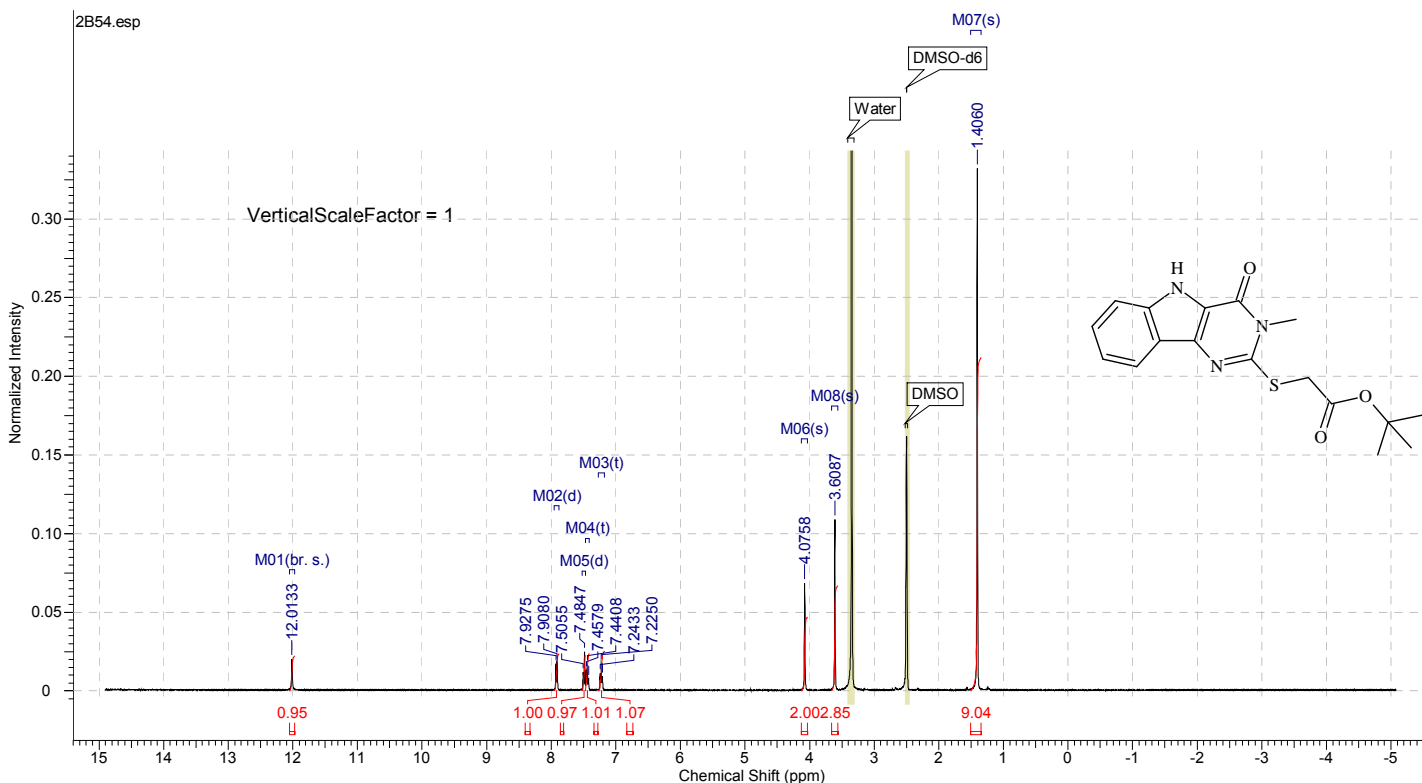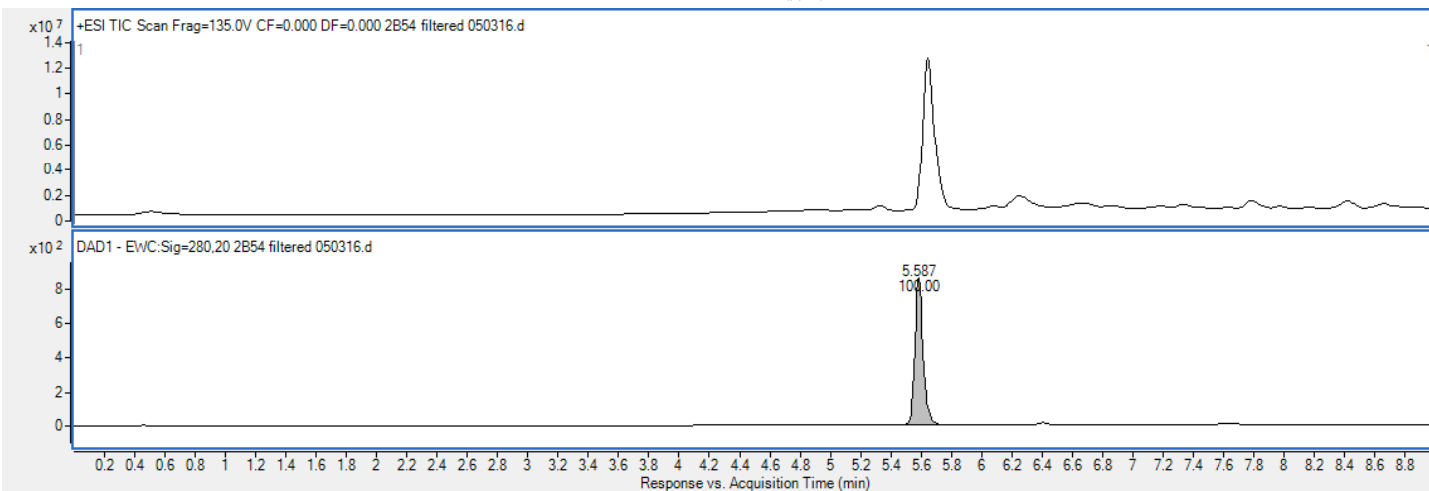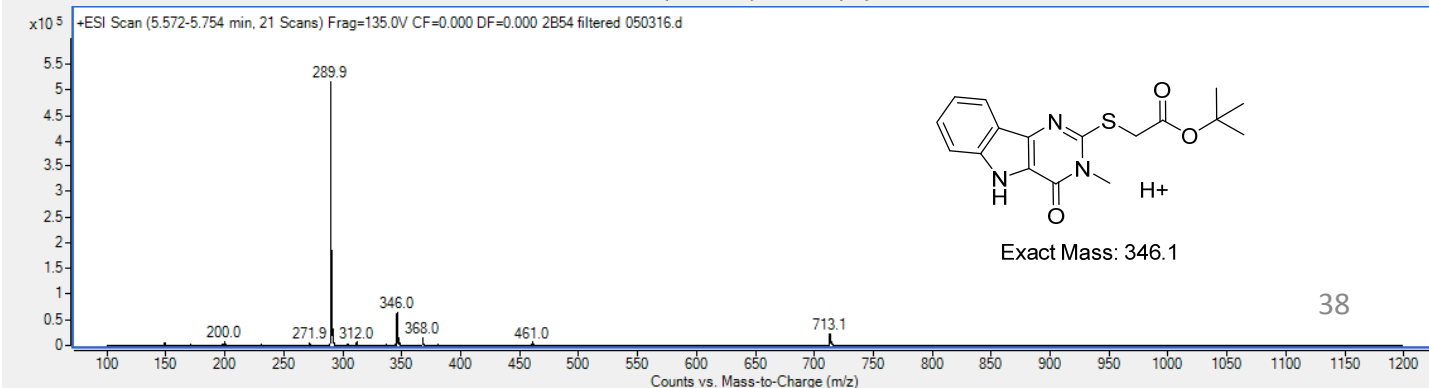

# <sup>1</sup>H NMR, LC-MS

## 6{5,3}

4/20/2017 9:56:18 AM

| Acquisition Time (sec) | 2.0081     | Comment        | STANDARD 1H OBSERVE                                                     |                      | Date    | Jan 5 2017             |                     |
|------------------------|------------|----------------|-------------------------------------------------------------------------|----------------------|---------|------------------------|---------------------|
| Date Stamp             | Jan 5 2017 | File Name      | C:\Documents and Settings\Mycoahhh\My Documents\NMR\mchan\2B120.fid\fid |                      |         |                        |                     |
| Frequency (MHz)        | 400.05     | Nucleus        | 1H                                                                      | Number of Transients | 16      | Original Points Count  | 16052               |
| Points Count           | 32768      | Pulse Sequence | s2pul                                                                   | Receiver Gain        | 20.00   | Solvent                | DMSO-d6             |
| Spectrum Offset (Hz)   | 1964.5853  | Spectrum Type  | STANDARD                                                                | Sweep Width (Hz)     | 7993.60 | Temperature (degree C) | AMBIENT TEMPERATURE |

<sup>1</sup>H NMR (400 MHz, DMSO-d<sub>6</sub>) δ 12.01 (s, 1H), 7.91 (d, *J* = 8.05 Hz, 1H), 7.49 (d, *J* = 8.54 Hz, 1H), 7.44 (t, *J* = 7.80 Hz, 1H), 7.22 (t, *J* = 7.44 Hz, 1H), 4.20 (q, *J* = 6.83 Hz, 2H), 4.08 (s, 2H), 1.38 (s, 9H), 1.33 (t, *J* = 7.07 Hz, 3H)

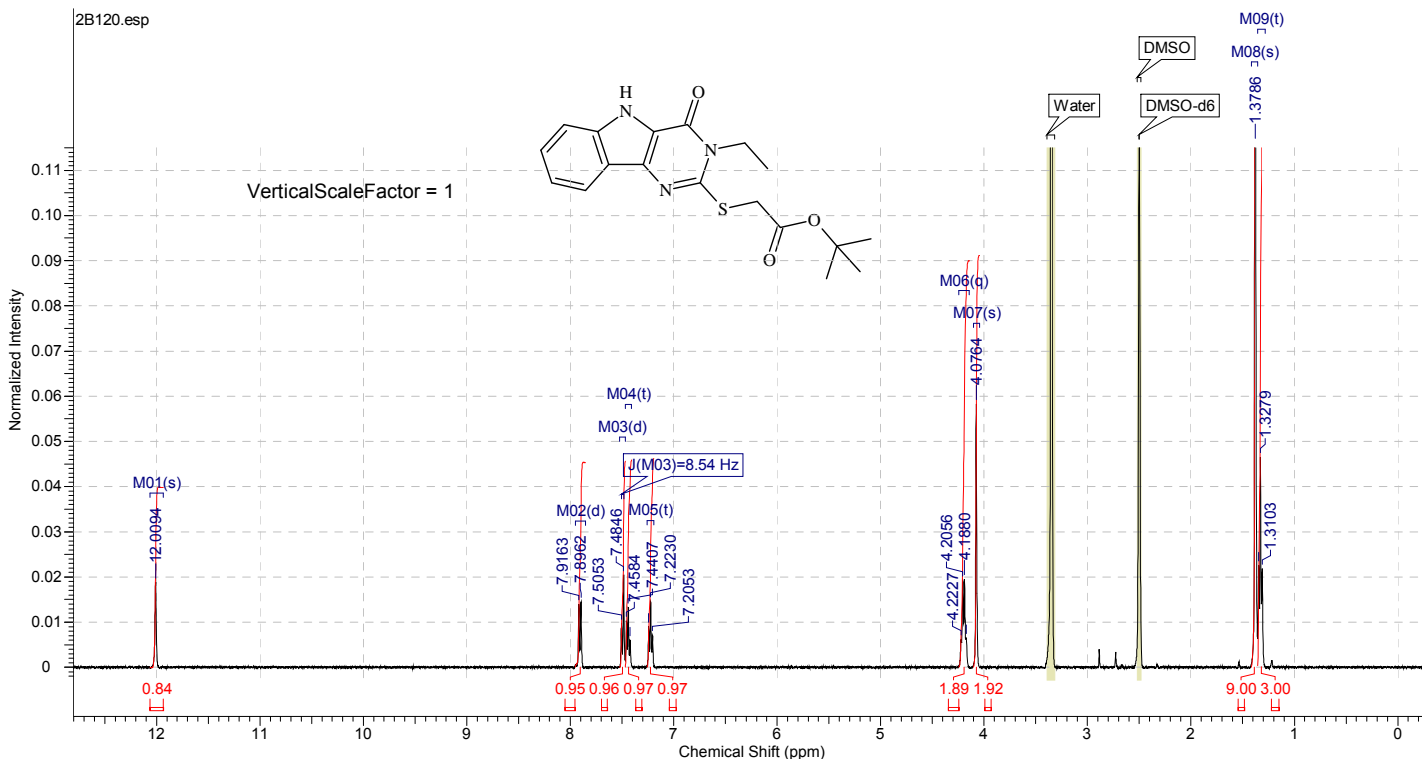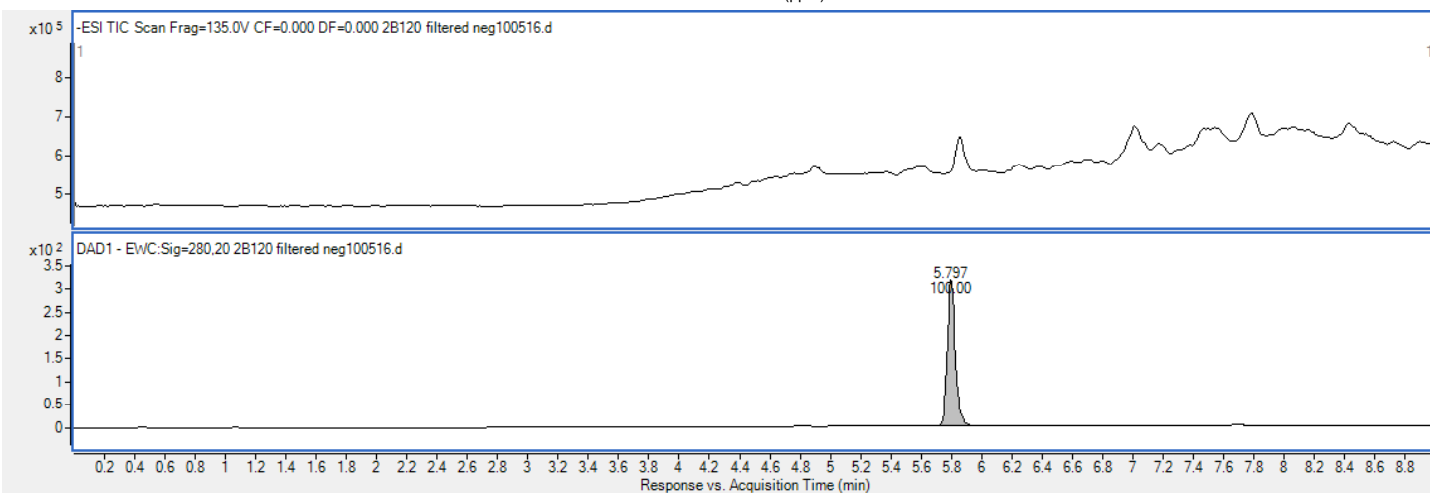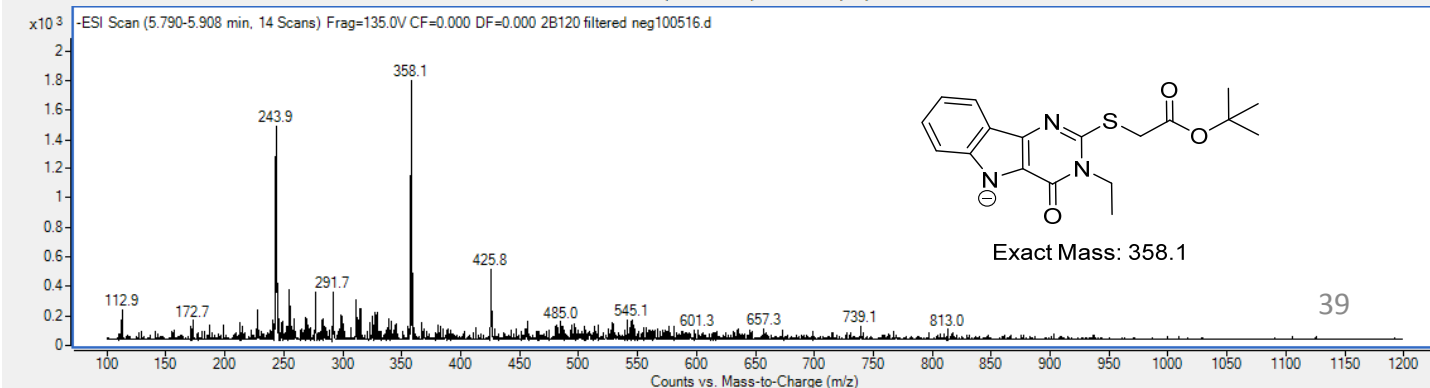

# <sup>1</sup>H NMR, LC-MS

## 6{6,3}

4/20/2017 10:02:49 AM

| Acquisition Time (sec) | 2.0162     | Comment        | STANDARD 1H OBSERVE                                                     | Date                   | Jan 5 2017          |
|------------------------|------------|----------------|-------------------------------------------------------------------------|------------------------|---------------------|
| Date Stamp             | Jan 5 2017 | File Name      | C:\Documents and Settings\Mycoahhh\My Documents\NMR\mchan\2B127.fid\fid |                        |                     |
| Frequency (MHz)        | 400.05     | Nucleus        | 1H                                                                      | Number of Transients   | 16                  |
| Points Count           | 16384      | Pulse Sequence | s2pul                                                                   | Receiver Gain          | 20.00               |
| Spectrum Offset (Hz)   | 1956.6102  | Spectrum Type  | STANDARD                                                                | Sweep Width (Hz)       | 7993.60             |
|                        |            |                |                                                                         | Solvent                | DMSO-d6             |
|                        |            |                |                                                                         | Temperature (degree C) | AMBIENT TEMPERATURE |

<sup>1</sup>H NMR (400 MHz, DMSO-d<sub>6</sub>) δ 11.99 (s, 1H), 7.89 (d, *J* = 7.81 Hz, 1H), 7.47 (d, *J* = 8.29 Hz, 1H), 7.42 (t, *J* = 7.80 Hz, 1H), 7.20 (t, *J* = 7.32 Hz, 1H), 4.05 (s, 2H), 4.08 (t, *J* = 7.80 Hz, 2H), 1.75 (sxt, *J* = 7.30 Hz, 2H), 1.35 (s, 9H), 0.95 (t, *J* = 7.32 Hz, 3H)

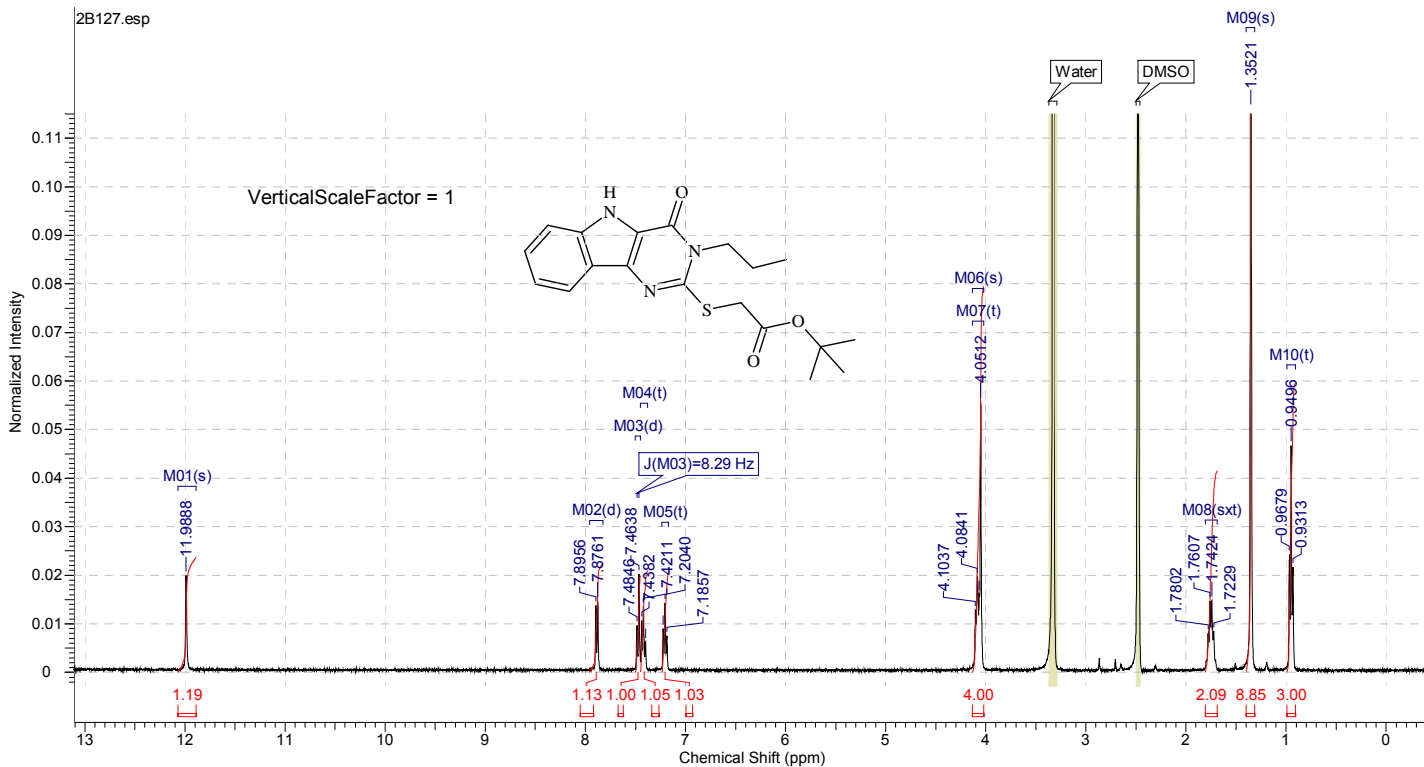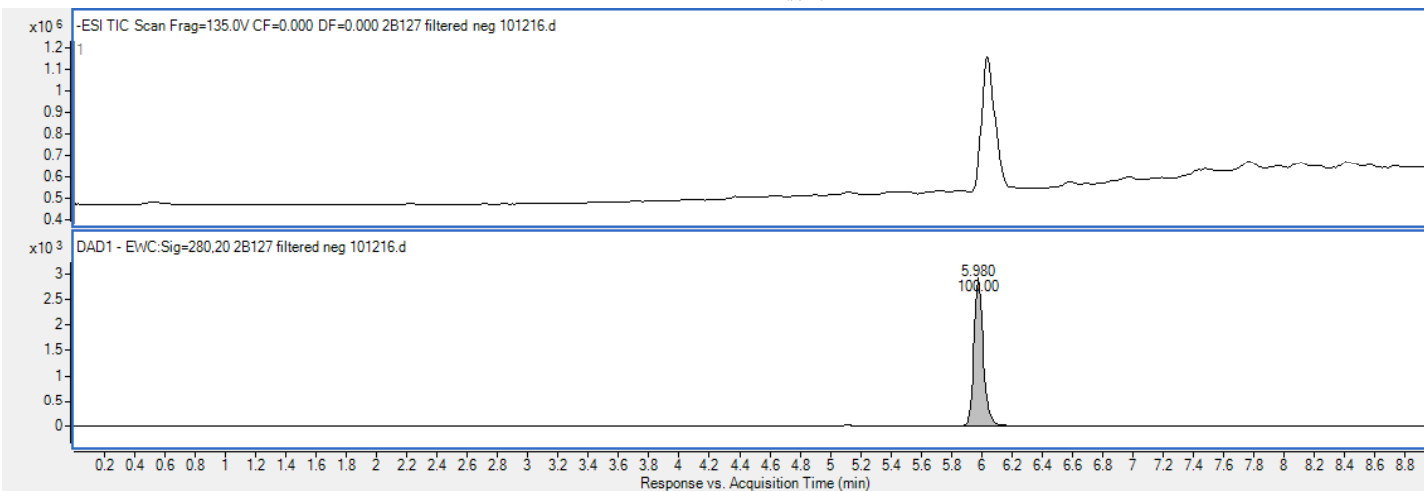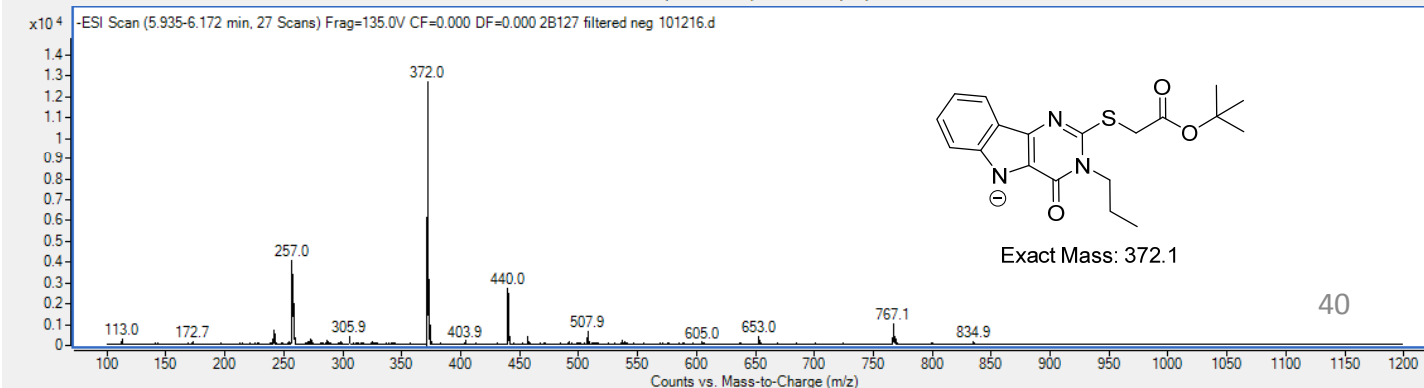



# <sup>1</sup>H NMR, LC-MS

## 6{7,3}

4/20/2017 10:16:16 AM

| Acquisition Time (sec) | 2.0130     | Comment        | STANDARD 1H OBSERVE                                                     |                      | Date    | Jan 5 2017             |                     |
|------------------------|------------|----------------|-------------------------------------------------------------------------|----------------------|---------|------------------------|---------------------|
| Date Stamp             | Jan 5 2017 | File Name      | C:\Documents and Settings\Mycoahhh\My Documents\NMR\mchan\2B126.fid\fid |                      |         |                        |                     |
| Frequency (MHz)        | 400.05     | Nucleus        | 1H                                                                      | Number of Transients | 16      | Original Points Count  | 16091               |
| Points Count           | 16384      | Pulse Sequence | s2pul                                                                   | Receiver Gain        | 20.00   | Solvent                | DMSO-d6             |
| Spectrum Offset (Hz)   | 1964.9807  | Spectrum Type  | STANDARD                                                                | Sweep Width (Hz)     | 7993.60 | Temperature (degree C) | AMBIENT TEMPERATURE |

<sup>1</sup>H NMR (400 MHz, DMSO-d<sub>6</sub>) δ 12.00 (s, 1H), 7.90 (d, *J* = 8.29 Hz, 1H), 7.50 (d, *J* = 8.29 Hz, 1H), 7.44 (t, *J* = 7.80 Hz, 1H), 7.22 (t, *J* = 7.32 Hz, 1H), 4.14 (t, *J* = 7.80 Hz, 2H), 4.07 (s, 2H), 1.73 (quin, *J* = 7.70 Hz, 2H), 1.30 - 1.48 (m, 11H), 0.95 (t, *J* = 7.32 Hz, 3H)

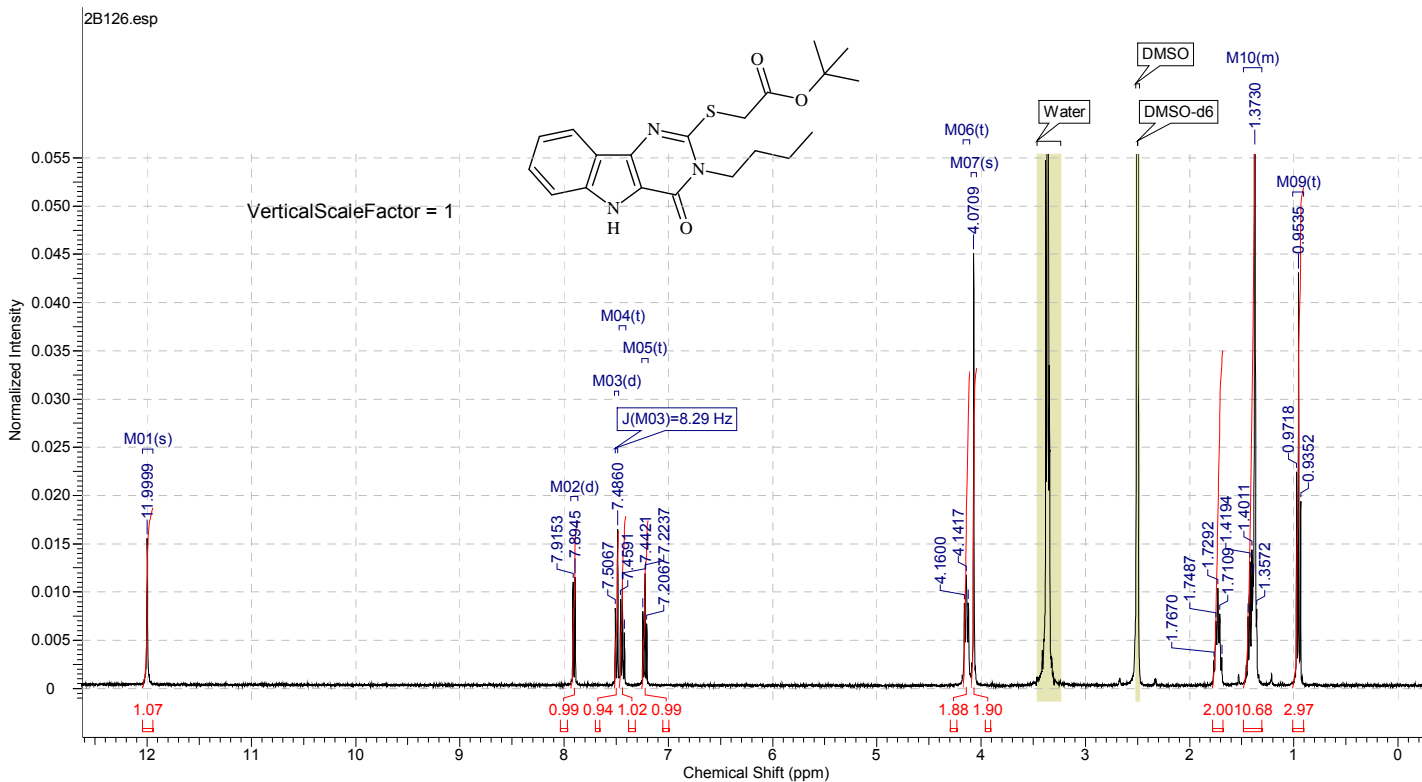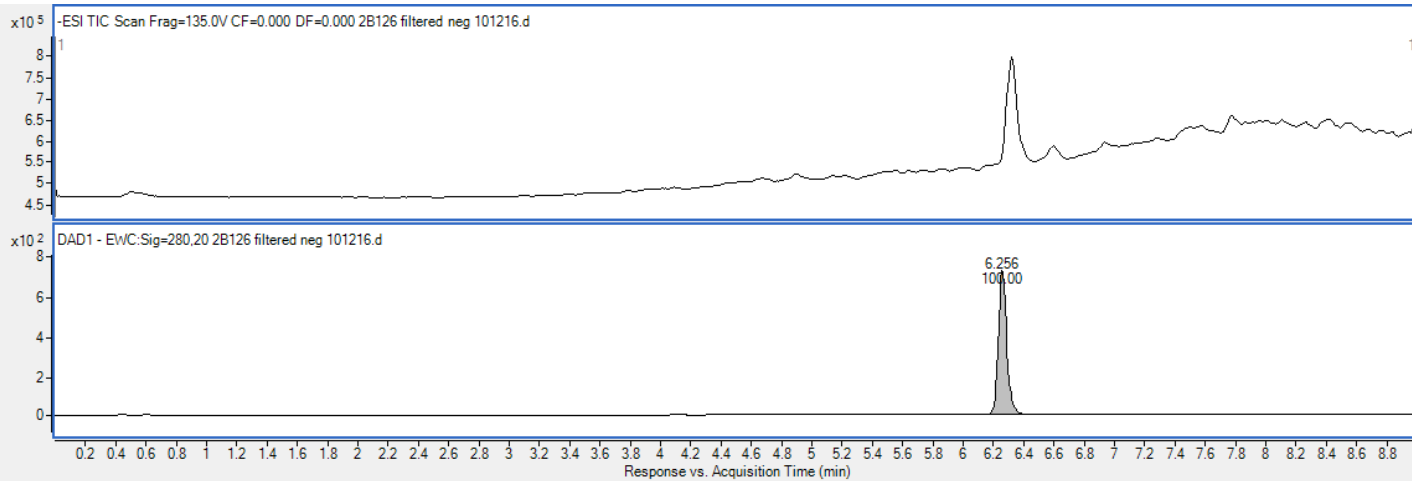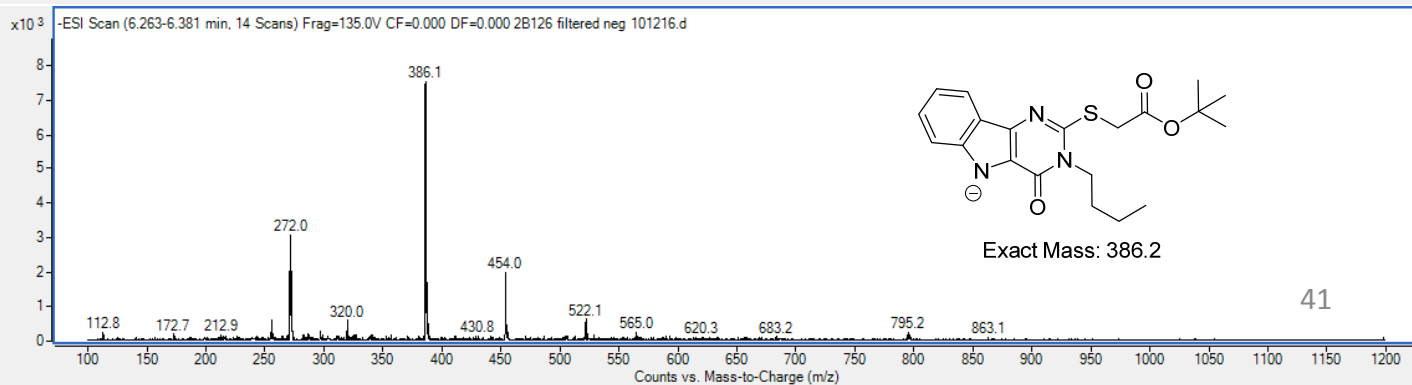

# <sup>1</sup>H NMR, LC-MS

# 6{1,4}

4/20/2017 10:27:57 AM

| Acquisition Time (sec) | 2.0309     | Comment        | STANDARD 1H OBSERVE                                                    |                      | Date    | Jan 5 2017             |                     |
|------------------------|------------|----------------|------------------------------------------------------------------------|----------------------|---------|------------------------|---------------------|
| Date Stamp             | Jan 5 2017 | File Name      | C:\Documents and Settings\Mycoahhh\My Documents\NMR\mchan\2B98.fid\fid |                      |         |                        |                     |
| Frequency (MHz)        | 400.05     | Nucleus        | 1H                                                                     | Number of Transients | 16      | Original Points Count  | 16234               |
| Points Count           | 16384      | Pulse Sequence | s2pul                                                                  | Receiver Gain        | 24.00   | Solvent                | DMSO-d6             |
| Spectrum Offset (Hz)   | 1956.6102  | Spectrum Type  | STANDARD                                                               | Sweep Width (Hz)     | 7993.60 | Temperature (degree C) | AMBIENT TEMPERATURE |

<sup>1</sup>H NMR (400 MHz, DMSO-d<sub>6</sub>) δ 12.56 (s, 1H), 12.08 (s, 1H), 7.80 (d, *J* = 8.29 Hz, 1H), 7.54 - 7.63 (m, 2H), 7.51 (d, *J* = 3.42 Hz, 1H), 7.35 - 7.48 (m, 4H), 7.16 (d, *J* = 3.42 Hz, 1H), 7.08 (t, *J* = 7.56 Hz, 1H), 4.16 (s, 2H)

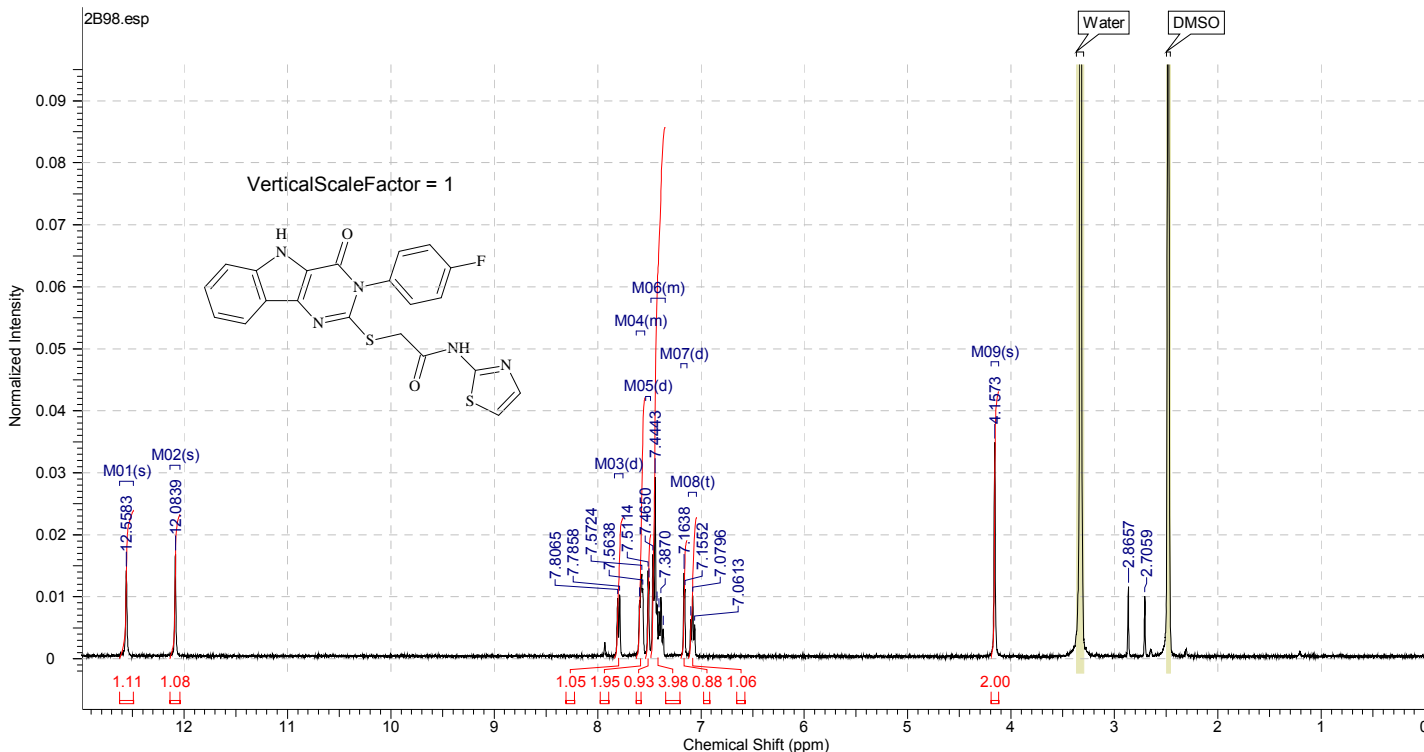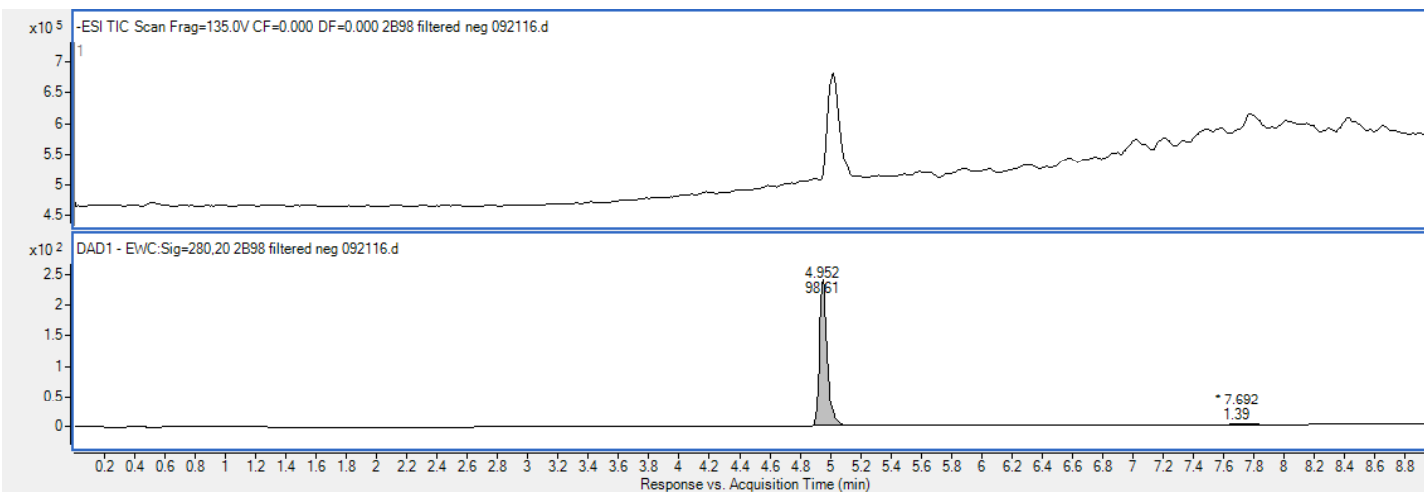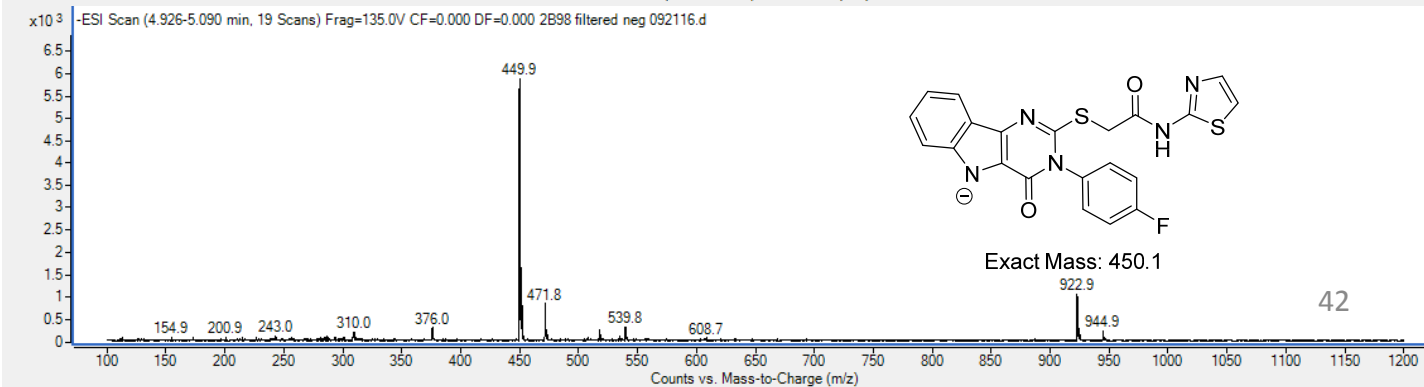

# <sup>1</sup>H NMR, LC-MS

# 6{2,4}

4/20/2017 10:36:32 AM

| Acquisition Time (sec) | 2.0276     | Comment        | STANDARD 1H OBSERVE                                                     |                      | Date    | Jan 5 2017             |                     |
|------------------------|------------|----------------|-------------------------------------------------------------------------|----------------------|---------|------------------------|---------------------|
| Date Stamp             | Jan 5 2017 | File Name      | C:\Documents and Settings\Mycoahhh\My Documents\NMR\mchan\2B103.fid\fid |                      |         |                        |                     |
| Frequency (MHz)        | 400.05     | Nucleus        | 1H                                                                      | Number of Transients | 16      | Original Points Count  | 16208               |
| Points Count           | 16384      | Pulse Sequence | s2pul                                                                   | Receiver Gain        | 20.00   | Solvent                | DMSO-d6             |
| Spectrum Offset (Hz)   | 1964.4928  | Spectrum Type  | STANDARD                                                                | Sweep Width (Hz)     | 7993.60 | Temperature (degree C) | AMBIENT TEMPERATURE |

<sup>1</sup>H NMR (400 MHz, DMSO-d<sub>6</sub>) δ 12.57 (s, 1H), 12.07 (s, 1H), 7.81 (d, J = 7.81 Hz, 1H), 7.50 - 7.56 (m, 1H), 7.47 (d, J = 8.29 Hz, 1H), 7.36 - 7.43 (m, 3H), 7.05 - 7.21 (m, 3H), 7.09 (t, J = 7.40 Hz, 1H), 4.15 (s, 2H), 3.87 (s, 3H)

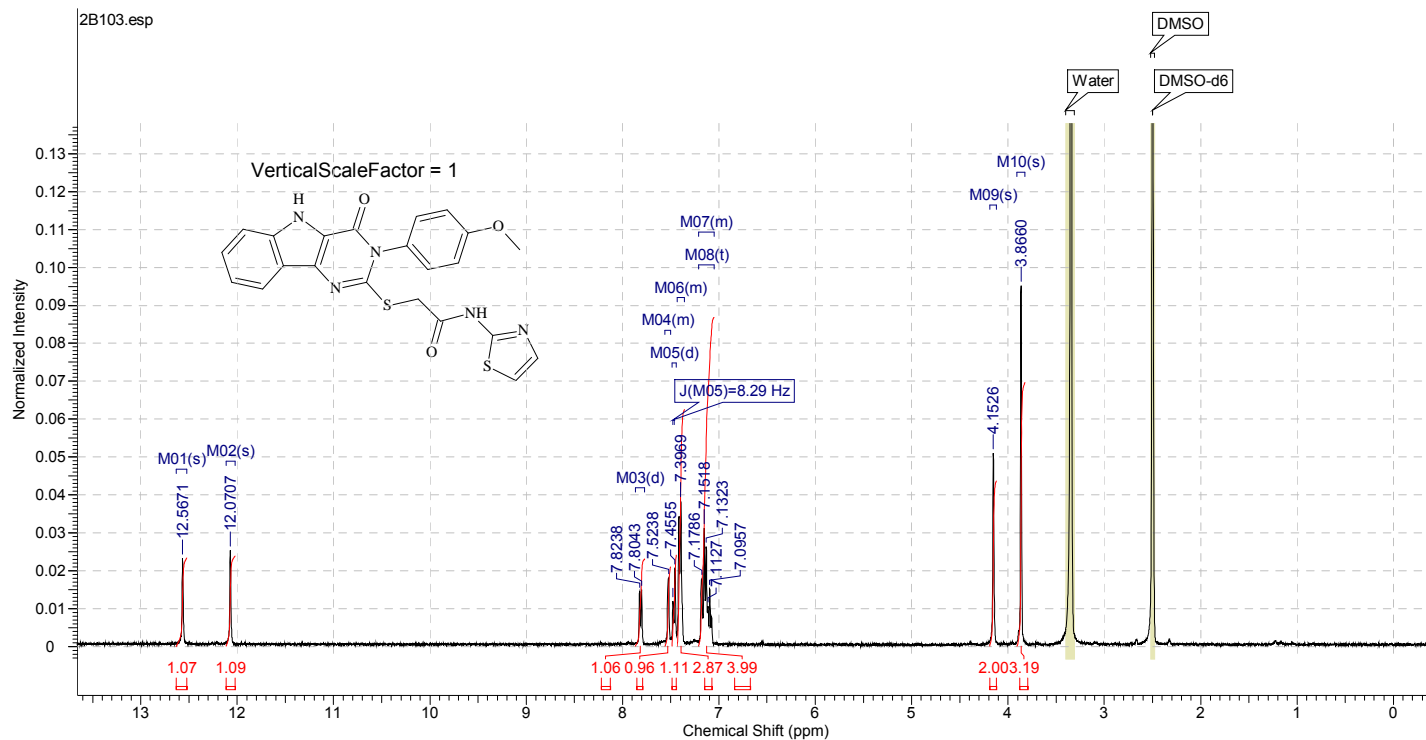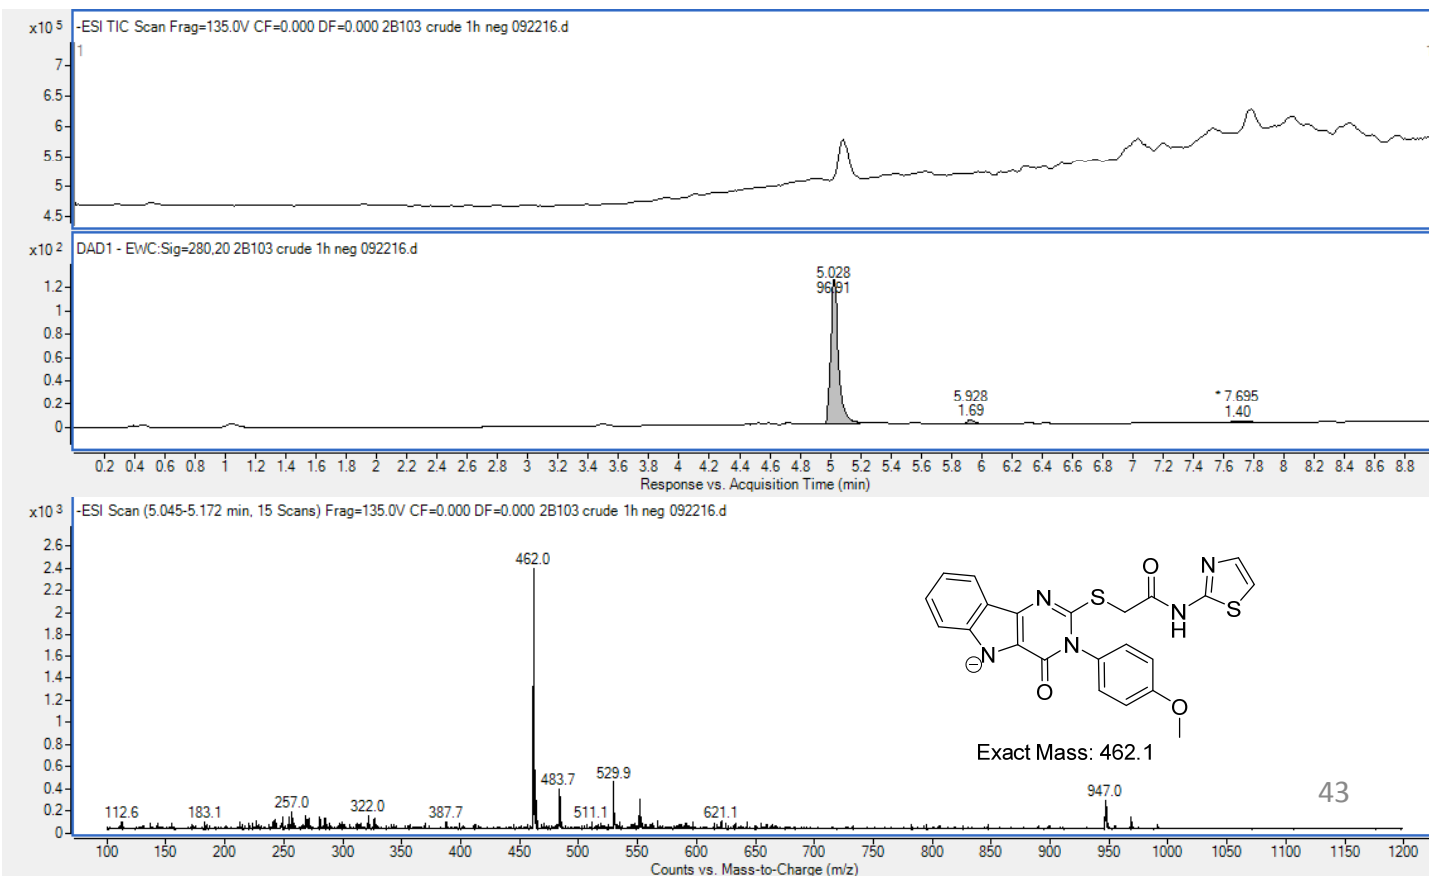

# <sup>1</sup>H NMR, LC-MS

# 6{3,4}

4/20/2017 10:41:21 AM

| Acquisition Time (sec) | 2.0260     | Comment        | STANDARD 1H OBSERVE                                                    |                      | Date    | Jan 5 2017             |                     |
|------------------------|------------|----------------|------------------------------------------------------------------------|----------------------|---------|------------------------|---------------------|
| Date Stamp             | Jan 5 2017 | File Name      | C:\Documents and Settings\Mycoahhh\My Documents\NMR\mchan\2B92.fid\fid |                      |         |                        |                     |
| Frequency (MHz)        | 400.05     | Nucleus        | 1H                                                                     | Number of Transients | 16      | Original Points Count  | 16195               |
| Points Count           | 16384      | Pulse Sequence | s2pul                                                                  | Receiver Gain        | 20.00   | Solvent                | DMSO-d6             |
| Spectrum Offset (Hz)   | 1964.4928  | Spectrum Type  | STANDARD                                                               | Sweep Width (Hz)     | 7993.60 | Temperature (degree C) | AMBIENT TEMPERATURE |

<sup>1</sup>H NMR (400 MHz, DMSO-d<sub>6</sub>) δ 12.64 (br. s., 1H), 11.86 (br. s., 1H), 7.73 (d, *J* = 7.81 Hz, 1H), 7.53 (br. s., 1H), 7.43 (d, *J* = 7.81 Hz, 1H), 7.36 (t, *J* = 7.30 Hz, 1H), 7.17 (br. s., 1H), 7.02 (t, *J* = 7.32 Hz, 1H), 4.57 - 4.74 (m, 1H), 4.28 (s, 2H), 1.66 (d, *J* = 6.34 Hz, 6H)

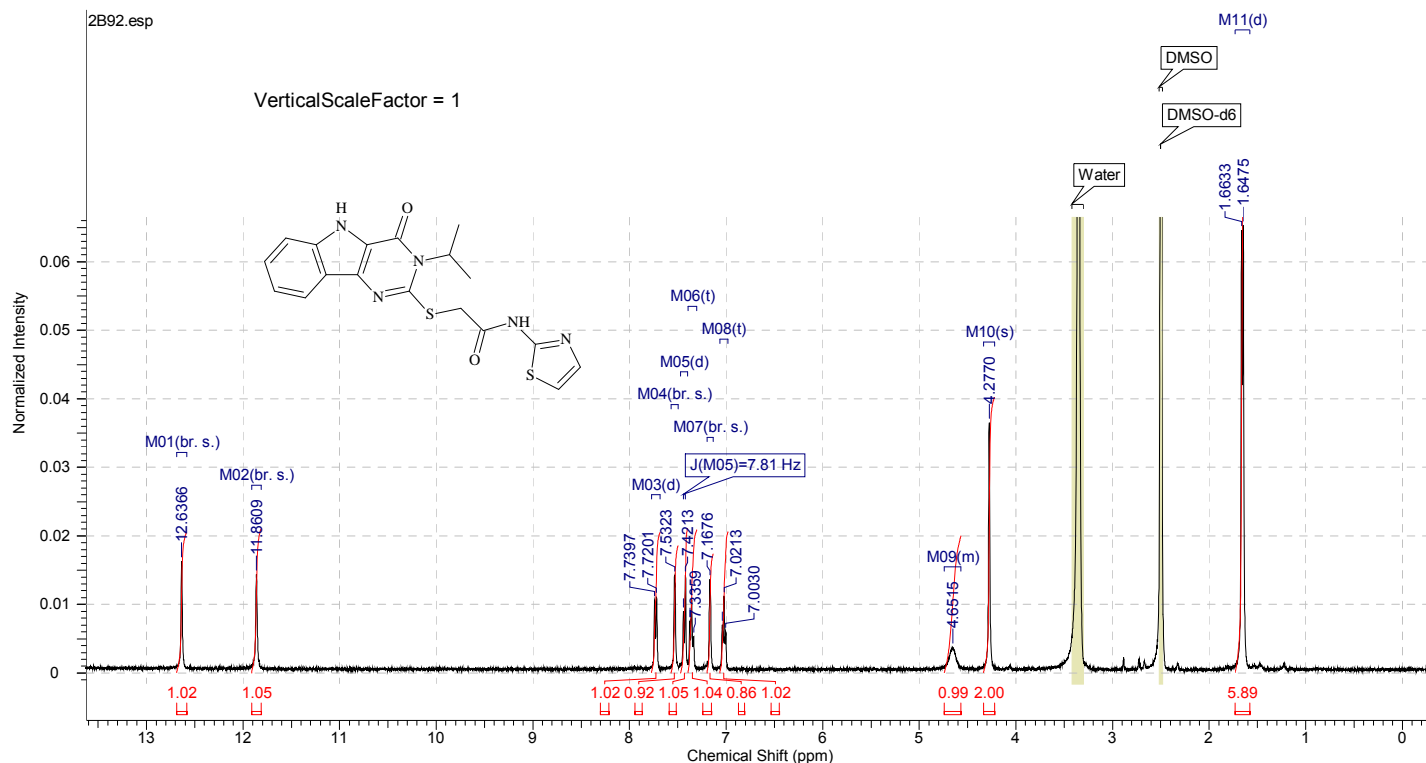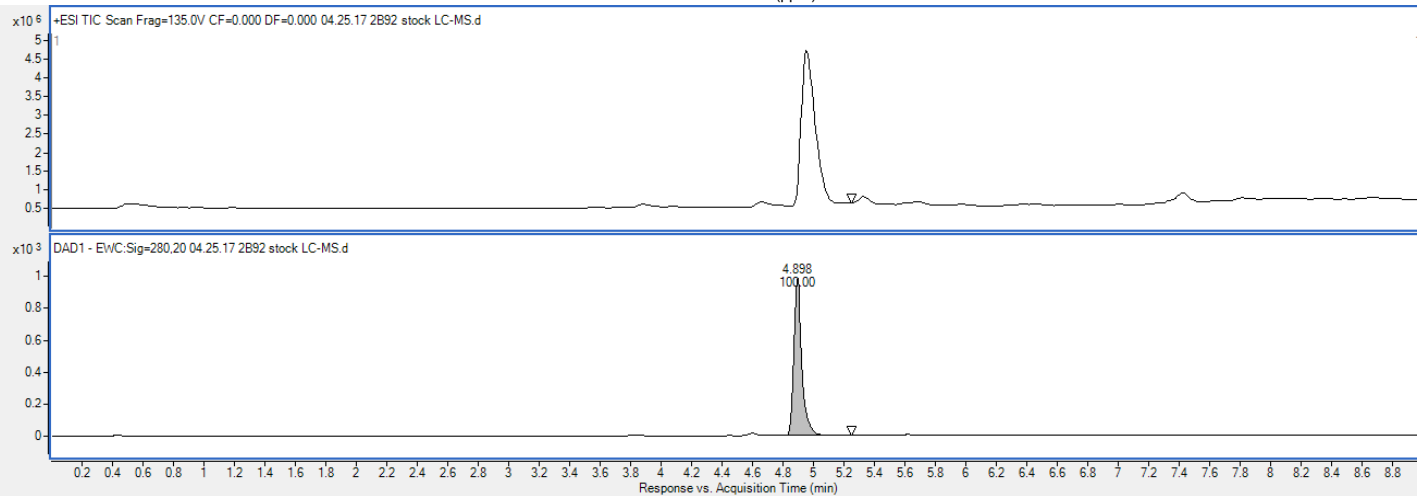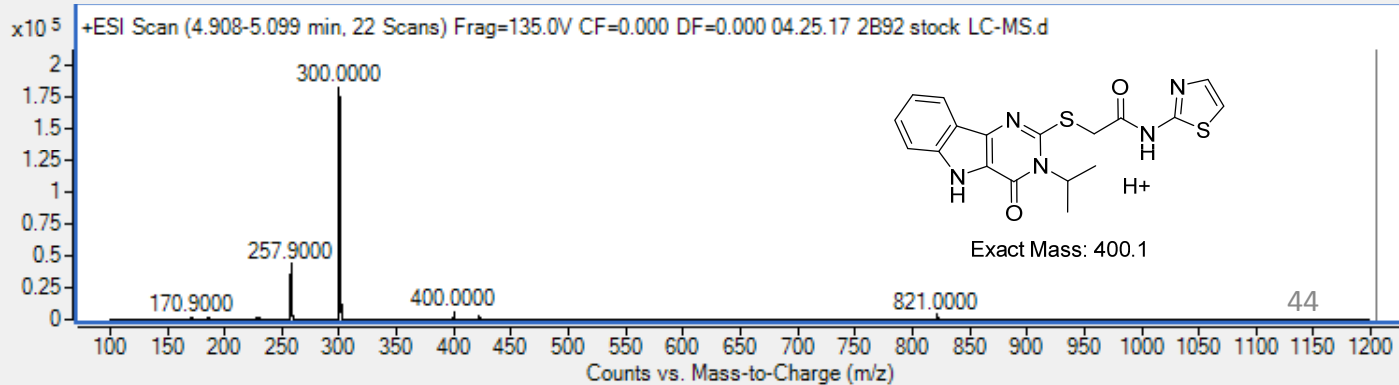

# <sup>1</sup>H NMR, LC-MS

# 6{4,4}

4/20/2017 10:46:03 AM

| Acquisition Time (sec) | 2.0374     | Comment        | STANDARD 1H OBSERVE                                                    |                      | Date    | Jan 5 2017             |                     |
|------------------------|------------|----------------|------------------------------------------------------------------------|----------------------|---------|------------------------|---------------------|
| Date Stamp             | Jan 5 2017 | File Name      | C:\Documents and Settings\Mycoahhh\My Documents\NMR\mchan\2B51.fid\fid |                      |         |                        |                     |
| Frequency (MHz)        | 400.05     | Nucleus        | 1H                                                                     | Number of Transients | 16      | Original Points Count  | 16286               |
| Points Count           | 16384      | Pulse Sequence | s2pul                                                                  | Receiver Gain        | 22.00   | Solvent                | DMSO-d6             |
| Spectrum Offset (Hz)   | 1964.9807  | Spectrum Type  | STANDARD                                                               | Sweep Width (Hz)     | 7993.60 | Temperature (degree C) | AMBIENT TEMPERATURE |

<sup>1</sup>H NMR (400 MHz, DMSO-d<sub>6</sub>) δ 12.62 (s, 1H), 11.97 (s, 1H), 7.77 (d, *J* = 7.81 Hz, 1H), 7.50 - 7.59 (m, 1H), 7.44 (d, *J* = 8.29 Hz, 1H), 7.38 (t, *J* = 7.30 Hz, 1H), 7.17 (d, *J* = 2.44 Hz, 1H), 7.06 (t, *J* = 7.30 Hz, 1H), 4.33 (s, 2H), 3.62 (s, 3H)

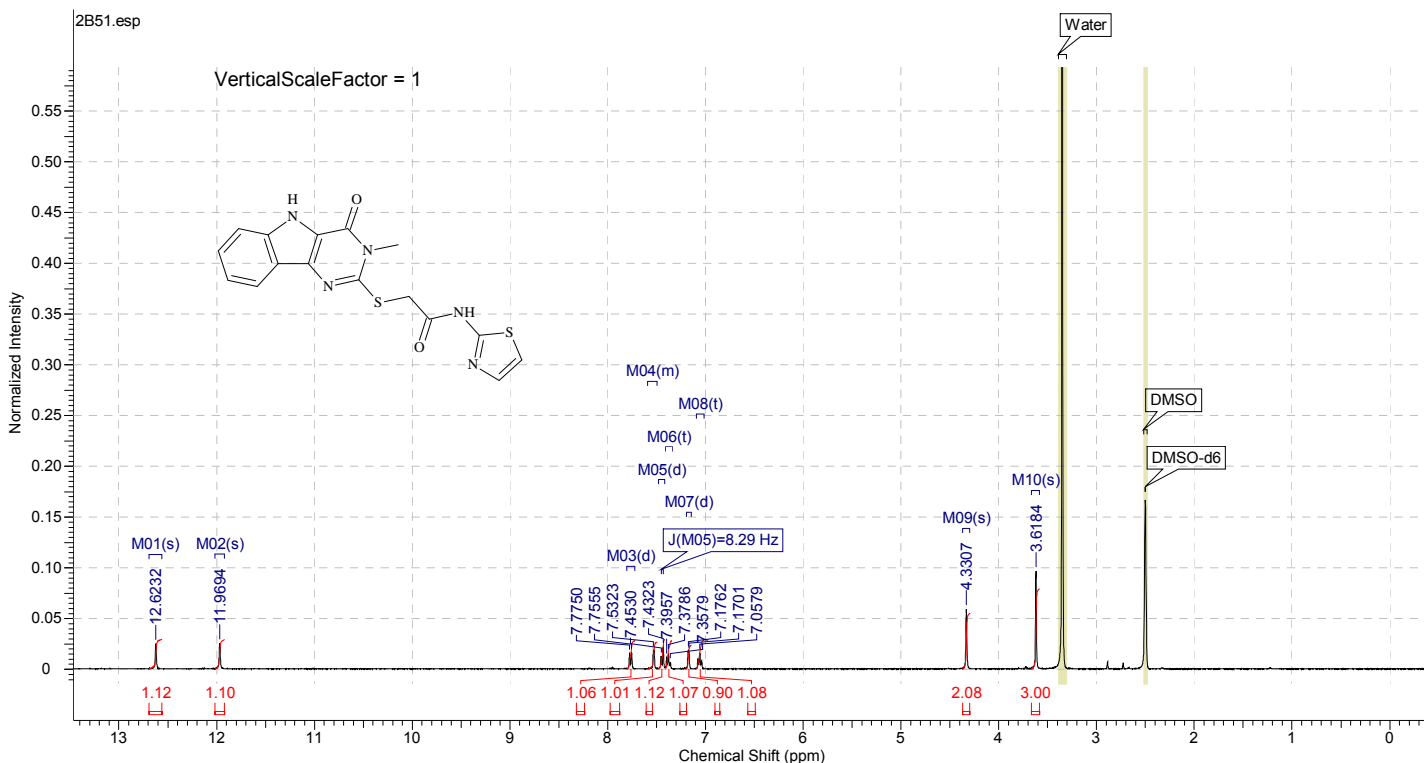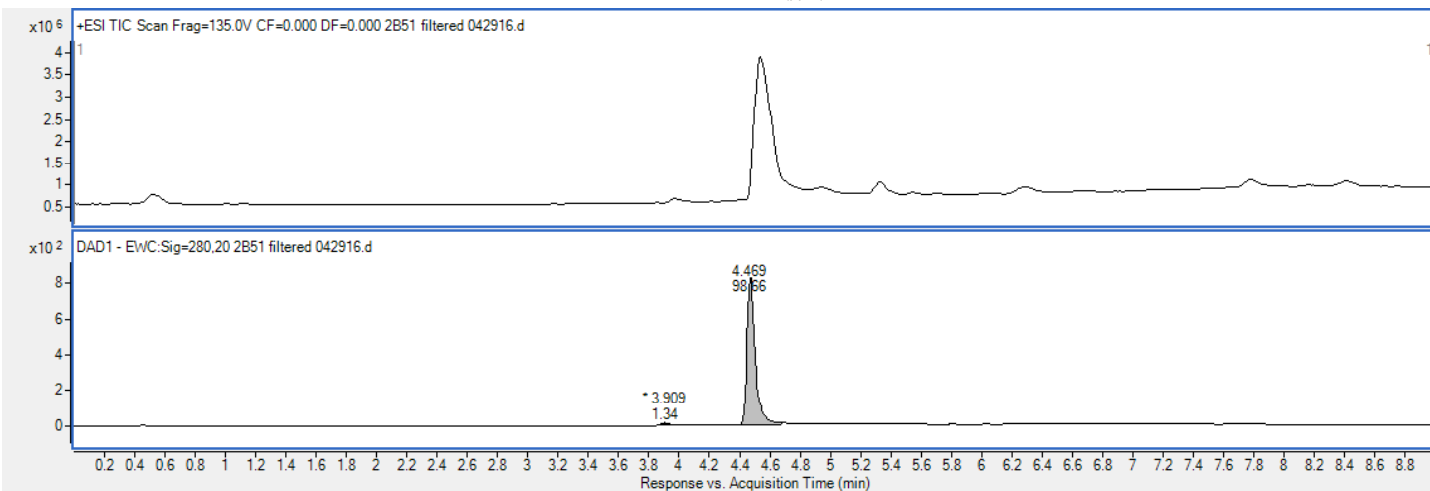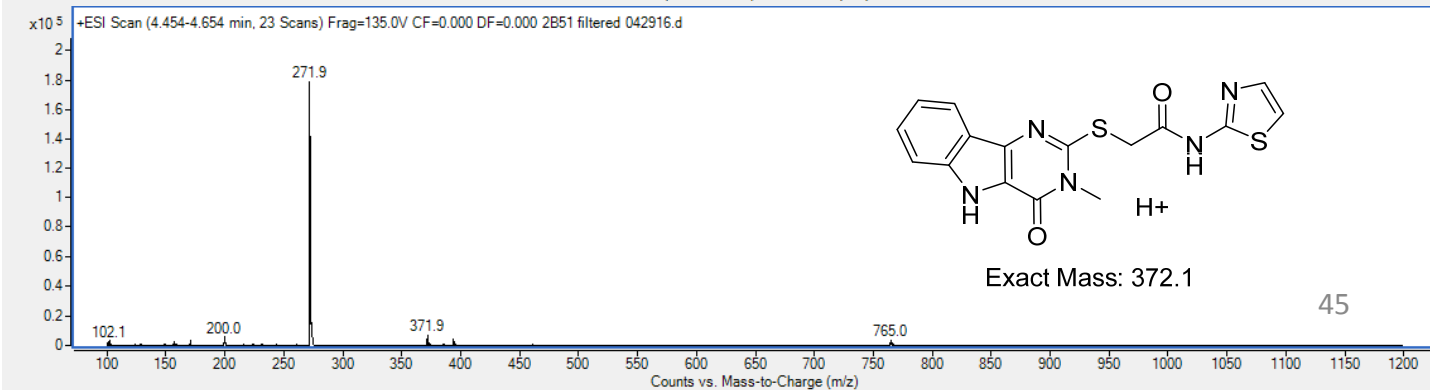

# <sup>1</sup>H NMR, LC-MS

## 6{5,4}

4/20/2017 10:54:06 AM

| Acquisition Time (sec) | 2.0358     | Comment        | STANDARD 1H OBSERVE                                                     |                      | Date    | Jan 5 2017             |                     |
|------------------------|------------|----------------|-------------------------------------------------------------------------|----------------------|---------|------------------------|---------------------|
| Date Stamp             | Jan 5 2017 | File Name      | C:\Documents and Settings\Mycoahhh\My Documents\NMR\mchan\2B113.fid\fid |                      |         |                        |                     |
| Frequency (MHz)        | 400.05     | Nucleus        | 1H                                                                      | Number of Transients | 16      | Original Points Count  | 16273               |
| Points Count           | 16384      | Pulse Sequence | s2pul                                                                   | Receiver Gain        | 16.00   | Solvent                | DMSO-d6             |
| Spectrum Offset (Hz)   | 1964.0049  | Spectrum Type  | STANDARD                                                                | Sweep Width (Hz)     | 7993.60 | Temperature (degree C) | AMBIENT TEMPERATURE |

<sup>1</sup>H NMR (400 MHz, DMSO-d<sub>6</sub>) δ 12.63 (br. s., 1H), 11.97 (br. s., 1H), 7.75 (d, *J* = 8.29 Hz, 1H), 7.28 - 7.56 (m, 2H), 7.38 (t, *J* = 7.00 Hz, 1H), 7.17 (br. s., 1H), 7.05 (t, *J* = 7.30 Hz, 1H), 4.32 (s, 2H), 4.20 (q, *J* = 6.80 Hz, 2H), 1.34 (t, *J* = 6.80 Hz, 3H)

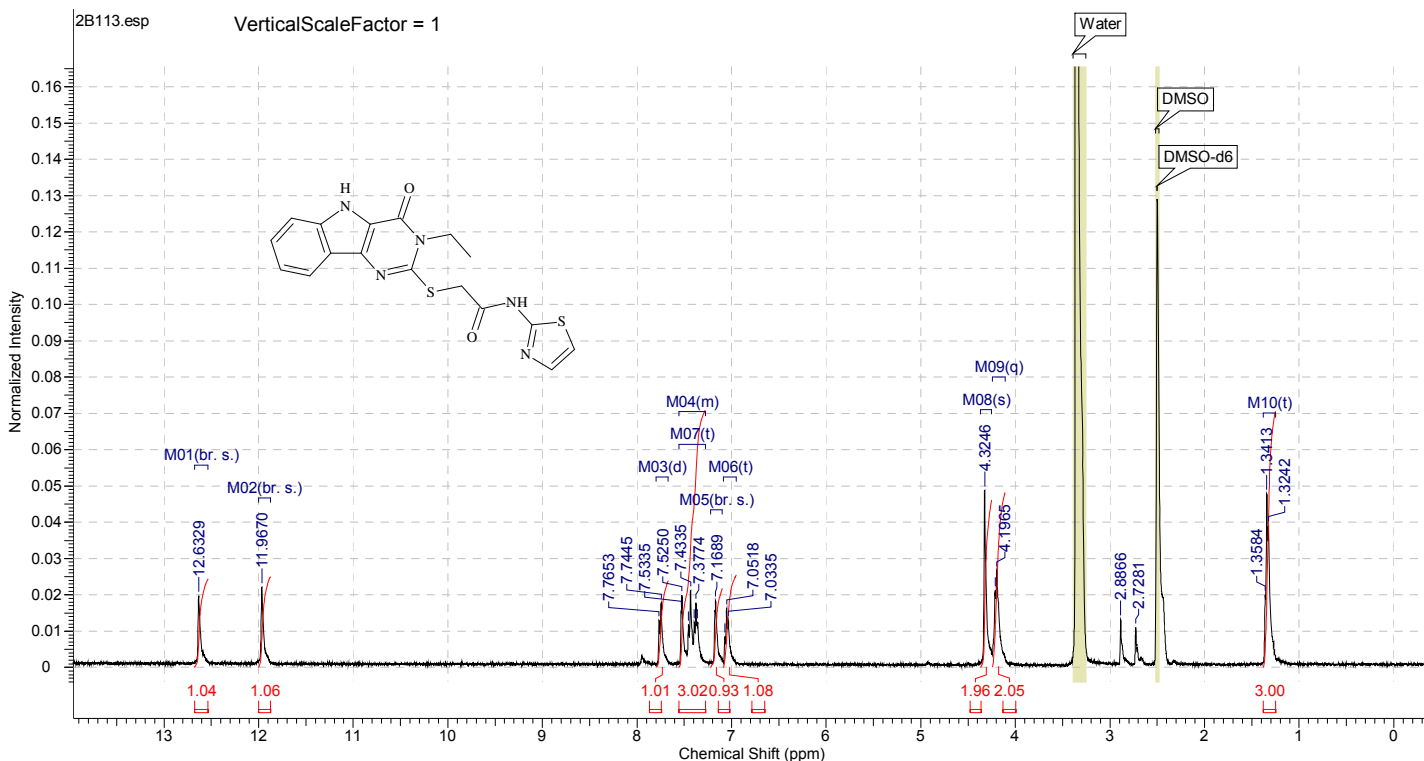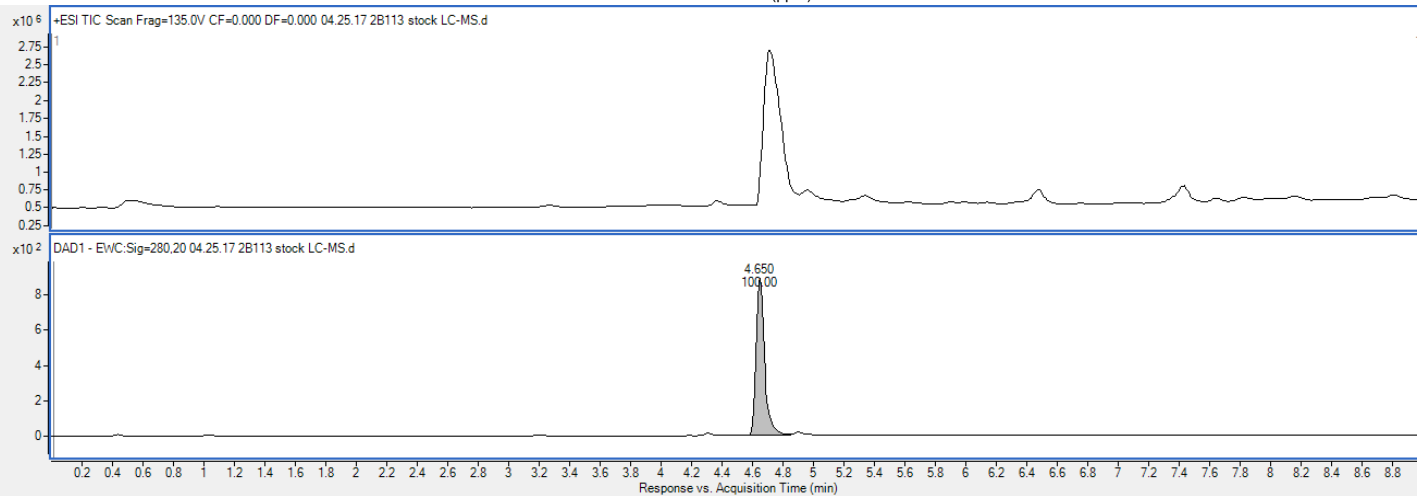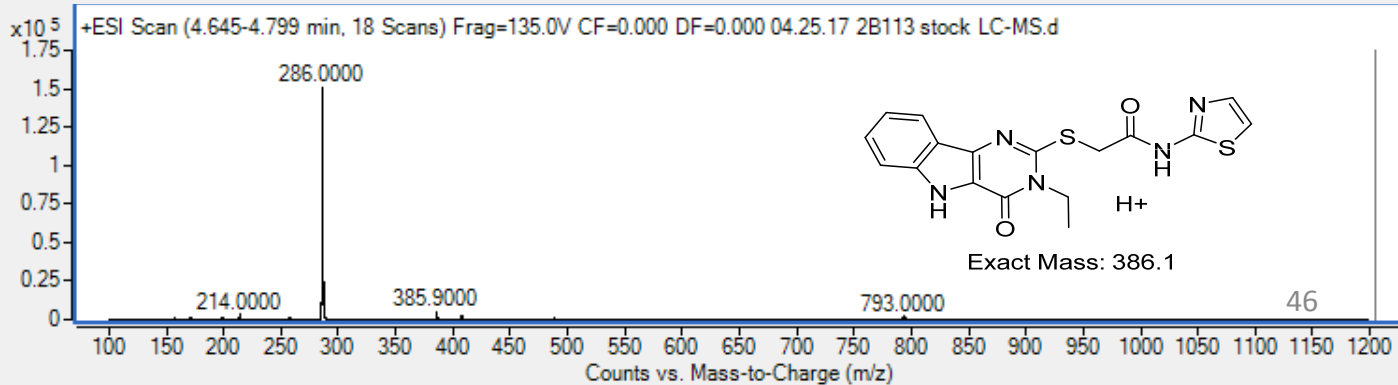

# <sup>1</sup>H NMR, LC-MS

## 6{6,4}

4/20/2017 10:59:11 AM

| Acquisition Time (sec) | 2.0114     | Comment        | STANDARD 1H OBSERVE                                                     | Date                   | Jan 5 2017          |
|------------------------|------------|----------------|-------------------------------------------------------------------------|------------------------|---------------------|
| Date Stamp             | Jan 5 2017 | File Name      | C:\Documents and Settings\Mycoahhh\My Documents\NMR\mchan\2B128.fid\fid |                        |                     |
| Frequency (MHz)        | 400.05     | Nucleus        | 1H                                                                      | Number of Transients   | 16                  |
| Points Count           | 16384      | Pulse Sequence | s2pul                                                                   | Receiver Gain          | 20.00               |
| Spectrum Offset (Hz)   | 1964.4928  | Spectrum Type  | STANDARD                                                                | Sweep Width (Hz)       | 7993.60             |
|                        |            |                |                                                                         | Solvent                | DMSO-d6             |
|                        |            |                |                                                                         | Temperature (degree C) | AMBIENT TEMPERATURE |

<sup>1</sup>H NMR (400 MHz, DMSO-d<sub>6</sub>) δ 12.63 (s, 1H), 11.97 (s, 1H), 7.76 (d, J = 8.29 Hz, 1H), 7.53 (d, J = 3.90 Hz, 1H), 7.44 (d, J = 8.29 Hz, 1H), 7.38 (t, J = 7.60 Hz, 1H), 7.17 (d, J = 3.42 Hz, 1H), 7.05 (t, J = 7.80 Hz, 1H), 4.32 (s, 2H), 4.11 (t, J = 7.56 Hz, 2H), 1.78 (sxt, J = 7.30 Hz, 2H), 0.98 (t, J = 7.56 Hz, 3H)

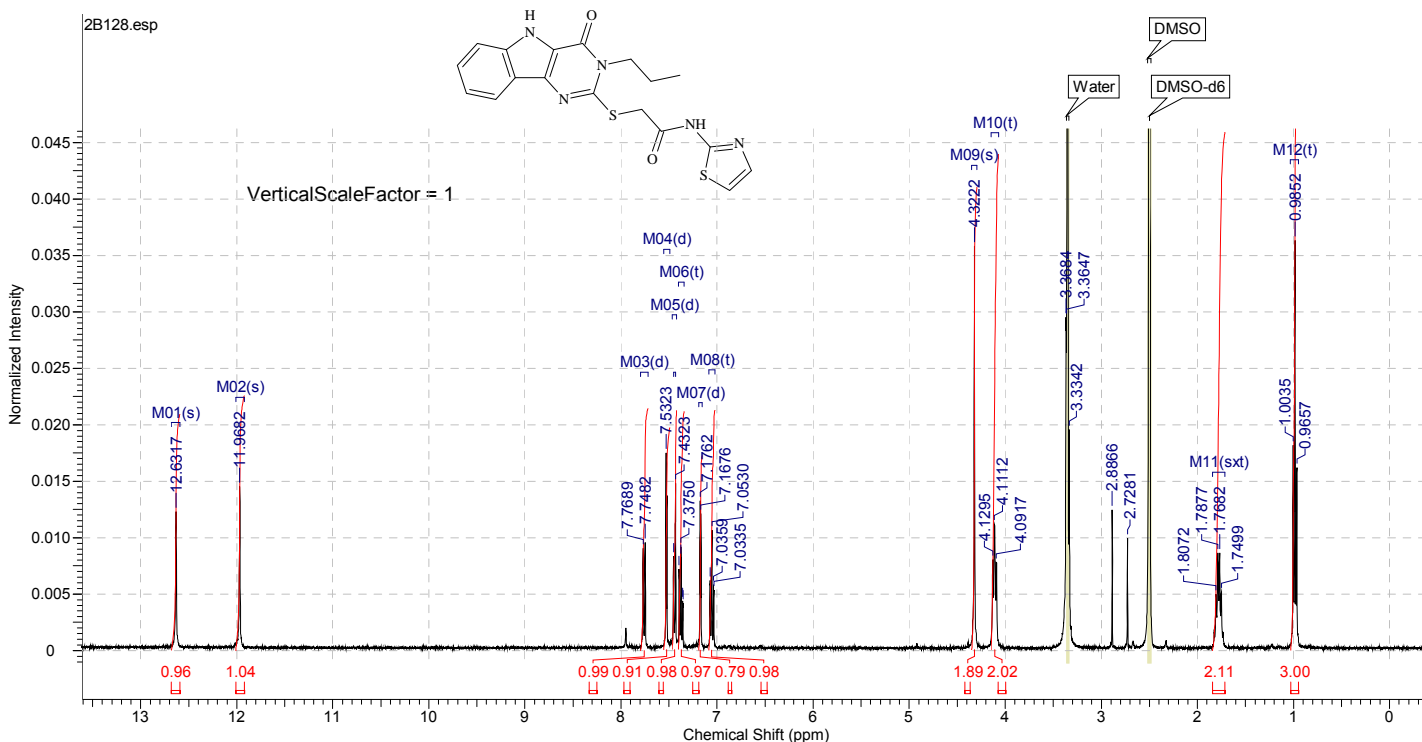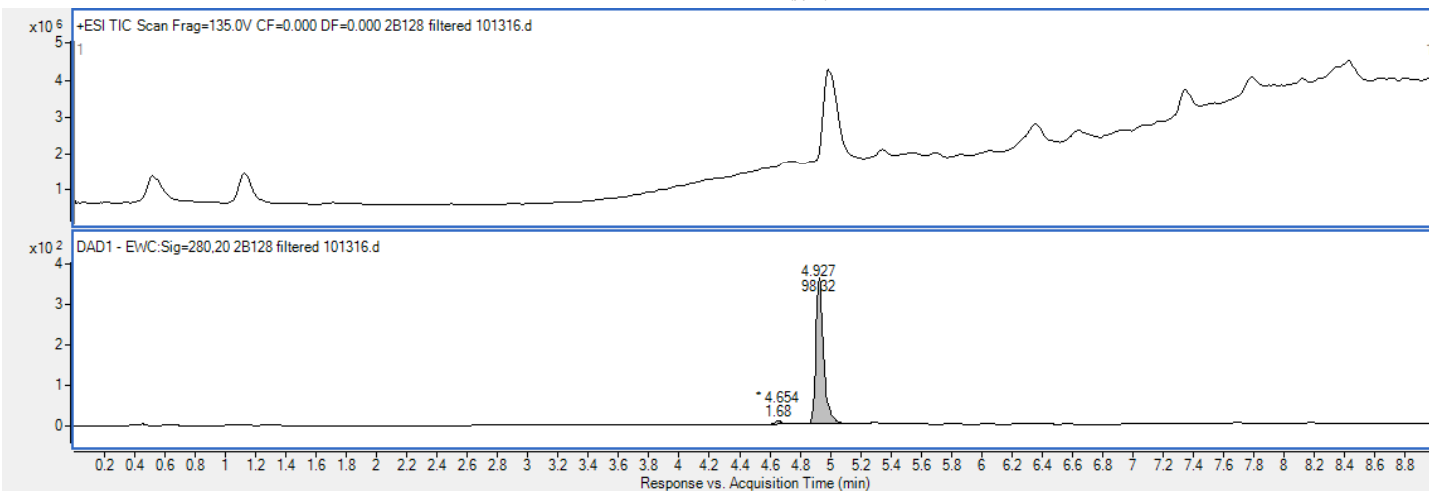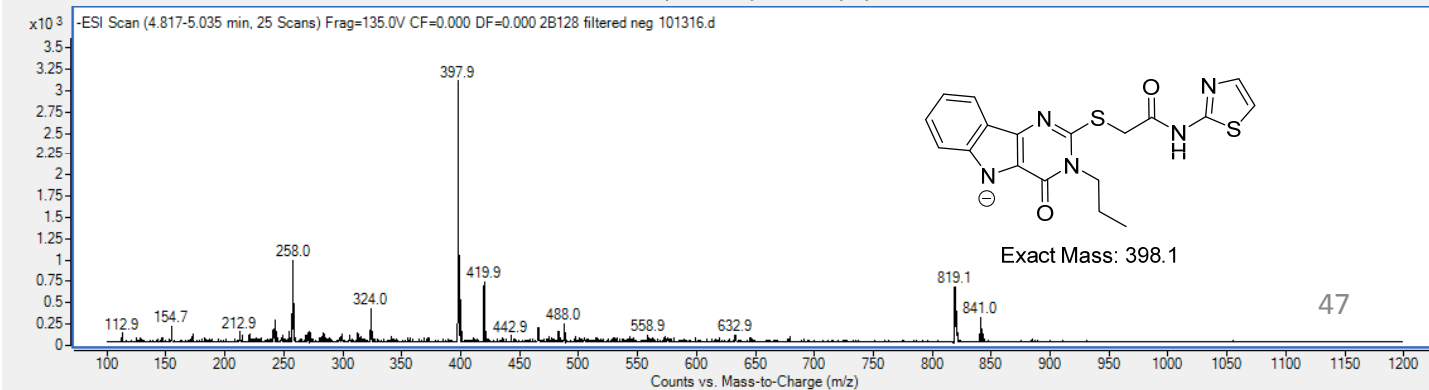

# <sup>1</sup>H NMR, LC-MS

## 6{7,4}

4/20/2017 11:10:54 AM

| Acquisition Time (sec) | 2.0244     | Comment        | STANDARD 1H OBSERVE                                                     |                      | Date    | Jan 5 2017             |                     |
|------------------------|------------|----------------|-------------------------------------------------------------------------|----------------------|---------|------------------------|---------------------|
| Date Stamp             | Jan 5 2017 | File Name      | C:\Documents and Settings\Mycoahhh\My Documents\NMR\mchan\2B107.fid\fid |                      |         |                        |                     |
| Frequency (MHz)        | 400.05     | Nucleus        | 1H                                                                      | Number of Transients | 16      | Original Points Count  | 16182               |
| Points Count           | 16384      | Pulse Sequence | s2pul                                                                   | Receiver Gain        | 20.00   | Solvent                | DMSO-d6             |
| Spectrum Offset (Hz)   | 1956.6102  | Spectrum Type  | STANDARD                                                                | Sweep Width (Hz)     | 7993.60 | Temperature (degree C) | AMBIENT TEMPERATURE |

<sup>1</sup>H NMR (400 MHz, DMSO-d<sub>6</sub>) δ 12.61 (s, 1H), 11.94 (s, 1H), 7.73 (d, *J* = 7.81 Hz, 1H), 7.51 (d, *J* = 2.93 Hz, 1H), 7.42 (d, *J* = 7.81 Hz, 1H), 7.36 (t, *J* = 7.80 Hz, 1H), 7.15 (d, *J* = 2.93 Hz, 1H), 7.03 (t, *J* = 7.30 Hz, 1H), 4.30 (s, 2H), 4.13 (t, *J* = 7.32 Hz, 2H), 1.72 (quin, *J* = 7.30 Hz, 2H), 1.40 (sxt, *J* = 7.30 Hz, 2H), 0.95 (t, *J* = 7.32 Hz, 3H)

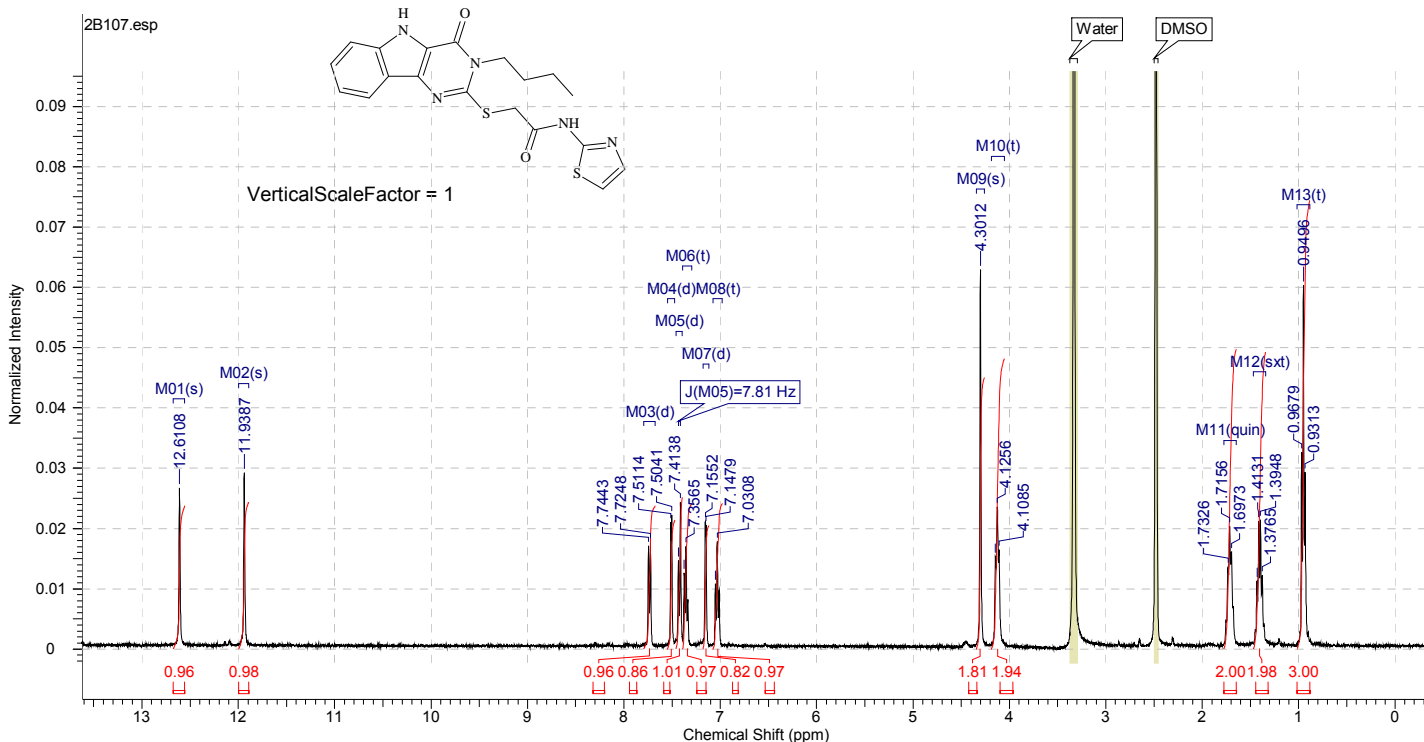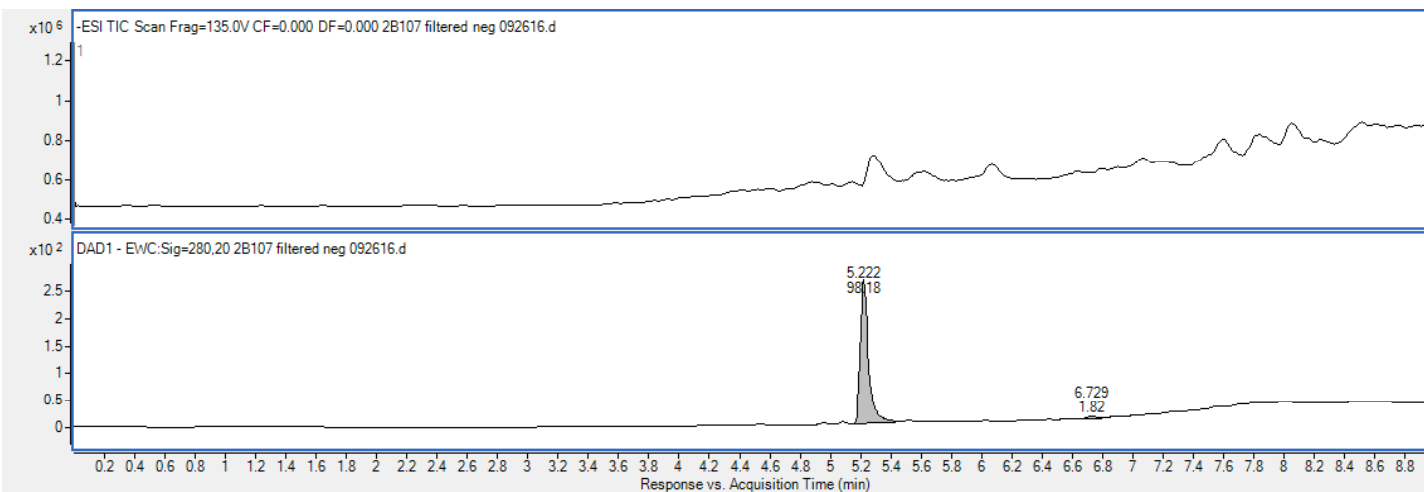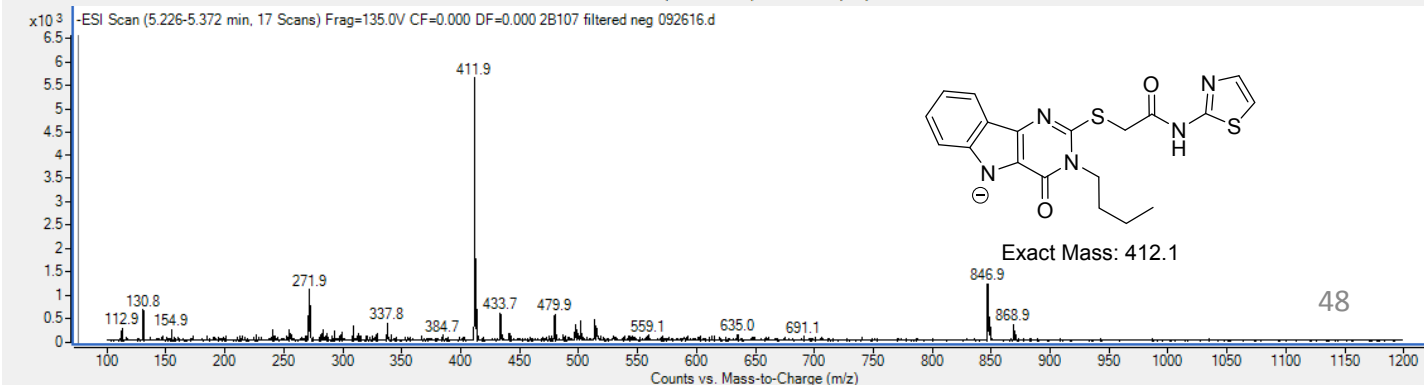



# <sup>1</sup>H NMR, LC-MS

## 6{1,5}

4/20/2017 11:32:20 AM

| Acquisition Time (sec) | 2.0081      | Comment        | STANDARD 1H OBSERVE                                                    |                      | Date    | Dec 23 2016            |                     |
|------------------------|-------------|----------------|------------------------------------------------------------------------|----------------------|---------|------------------------|---------------------|
| Date Stamp             | Dec 23 2016 | File Name      | C:\Documents and Settings\Mycoahhh\My Documents\NMR\mchan\2B99.fid\fid |                      |         |                        |                     |
| Frequency (MHz)        | 400.05      | Nucleus        | 1H                                                                     | Number of Transients | 16      | Original Points Count  | 16052               |
| Points Count           | 16384       | Pulse Sequence | s2pul                                                                  | Receiver Gain        | 20.00   | Solvent                | DMSO-d6             |
| Spectrum Offset (Hz)   | 1960.1014   | Spectrum Type  | STANDARD                                                               | Sweep Width (Hz)     | 7993.60 | Temperature (degree C) | AMBIENT TEMPERATURE |

<sup>1</sup>H NMR (400 MHz, DMSO-d<sub>6</sub>) δ 12.86 (s, 1H), 12.10 (s, 1H), 7.92 (d, J = 7.81 Hz, 1H), 7.85 (t, J = 7.56 Hz, 2H), 7.58 - 7.66 (m, 2H), 7.40 - 7.53 (m, 4H), 7.35 (t, J = 7.30 Hz, 1H), 7.29 (t, J = 7.80 Hz, 1H), 6.97 (t, J = 7.56 Hz, 1H), 4.23 (s, 2H)

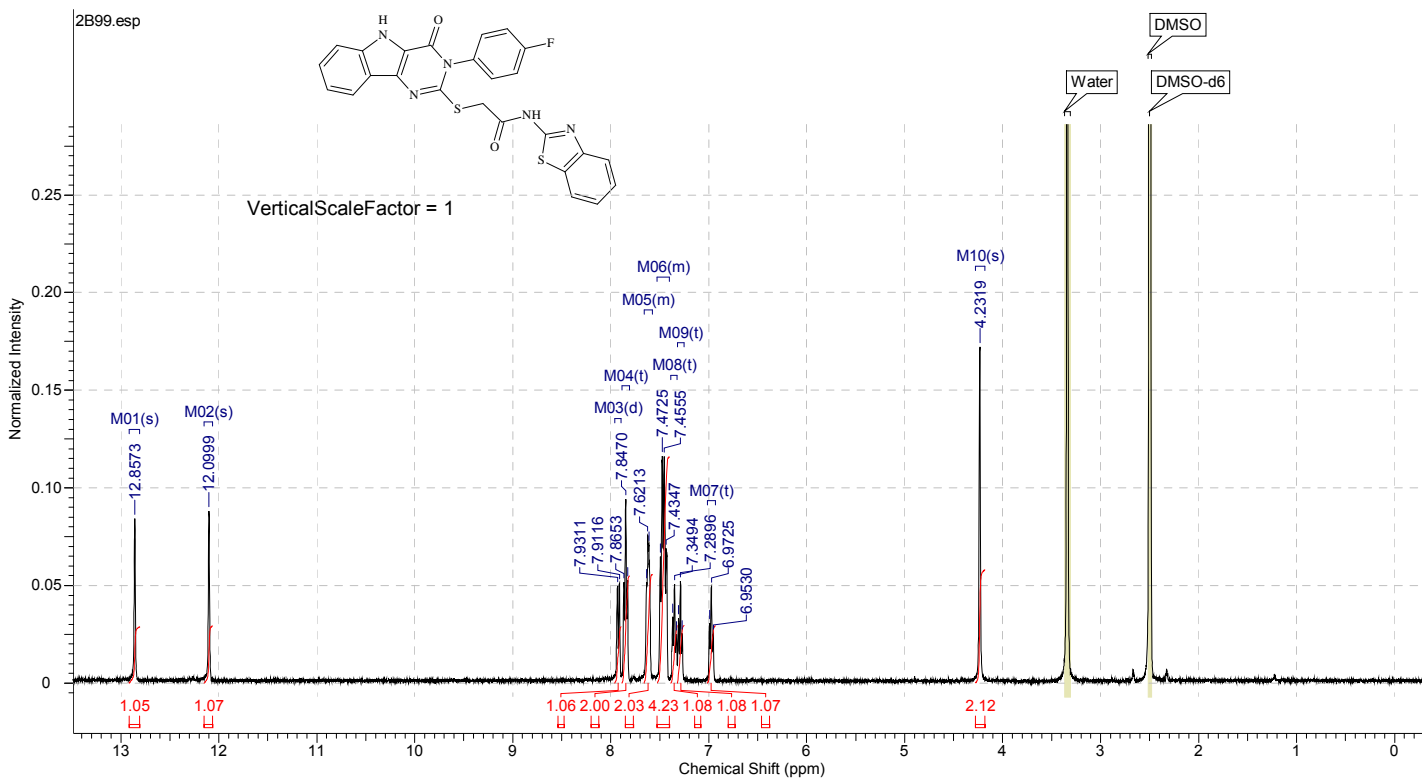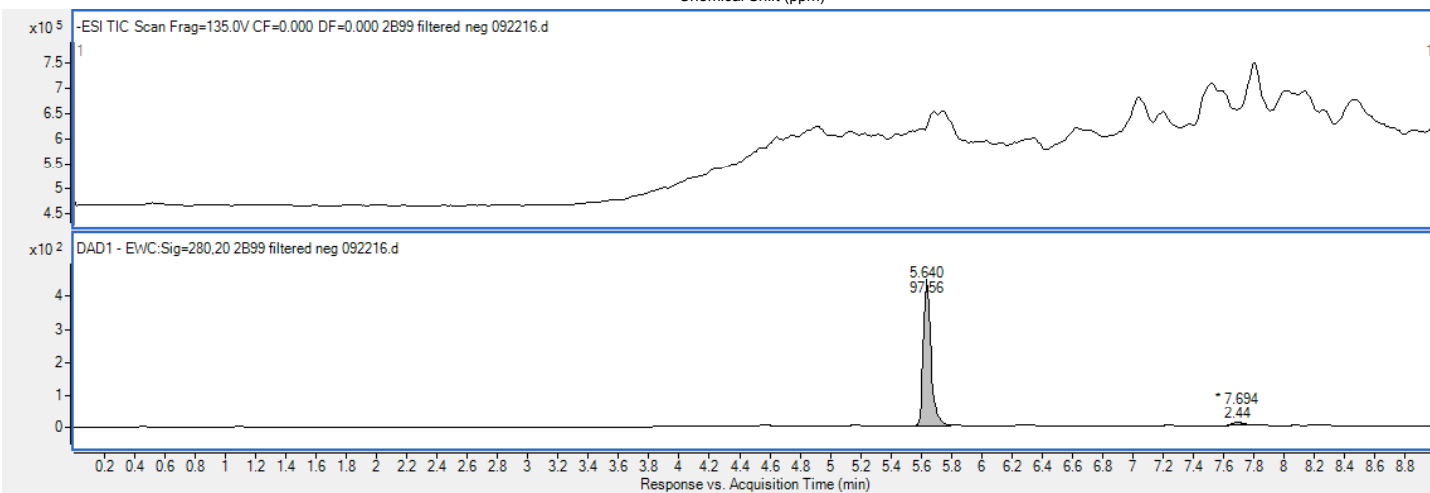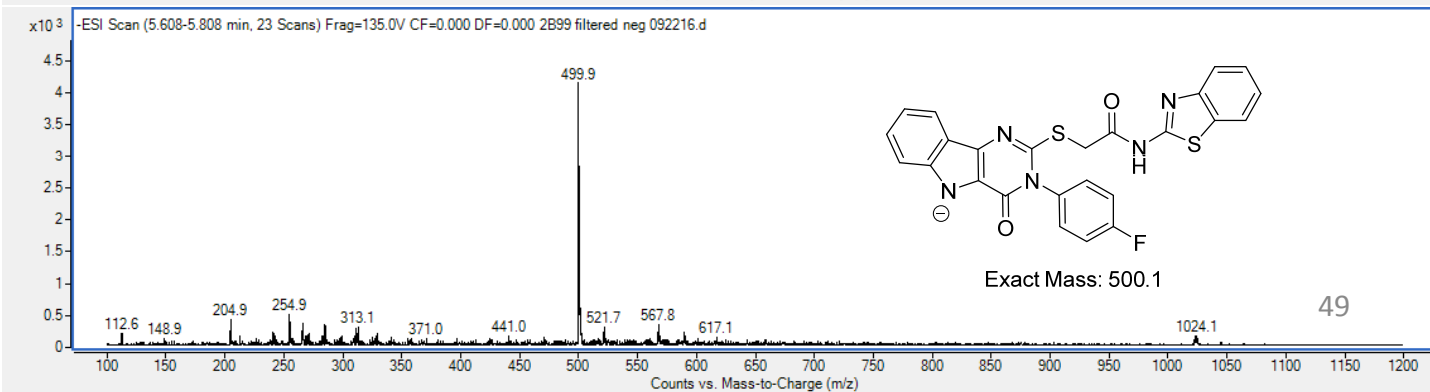

# <sup>1</sup>H NMR, LC-MS

# 6{2,5}

4/20/2017 11:38:18 AM

| Acquisition Time (sec) | 2.0049      | Comment        | STANDARD 1H OBSERVE                                                  | Date                   | Dec 23 2016         |
|------------------------|-------------|----------------|----------------------------------------------------------------------|------------------------|---------------------|
| Date Stamp             | Dec 23 2016 | File Name      | C:\Documents and Settings\Mycoahhh\My Documents\NMR\michan\2B104.fid |                        |                     |
| Frequency (MHz)        | 400.05      | Nucleus        | 1H                                                                   | Number of Transients   | 16                  |
| Points Count           | 16384       | Pulse Sequence | s2pul                                                                | Receiver Gain          | 20.00               |
| Spectrum Offset (Hz)   | 1961.5652   | Spectrum Type  | STANDARD                                                             | Sweep Width (Hz)       | 7993.60             |
|                        |             |                |                                                                      | Solvent                | DMSO-d6             |
|                        |             |                |                                                                      | Temperature (degree C) | AMBIENT TEMPERATURE |

<sup>1</sup>H NMR (400 MHz, DMSO-d<sub>6</sub>) δ 12.85 (s, 1H), 12.07 (s, 1H), 7.92 (d, J = 7.81 Hz, 1H), 7.85 (t, J = 6.59 Hz, 2H), 7.39 - 7.52 (m, 4H), 7.34 (t, J = 7.30 Hz, 1H), 7.29 (t, J = 7.30 Hz, 1H), 7.15 (d, J = 8.78 Hz, 2H), 6.97 (t, J = 7.56 Hz, 1H), 4.21 (s, 2H), 3.87 (s, 3H)

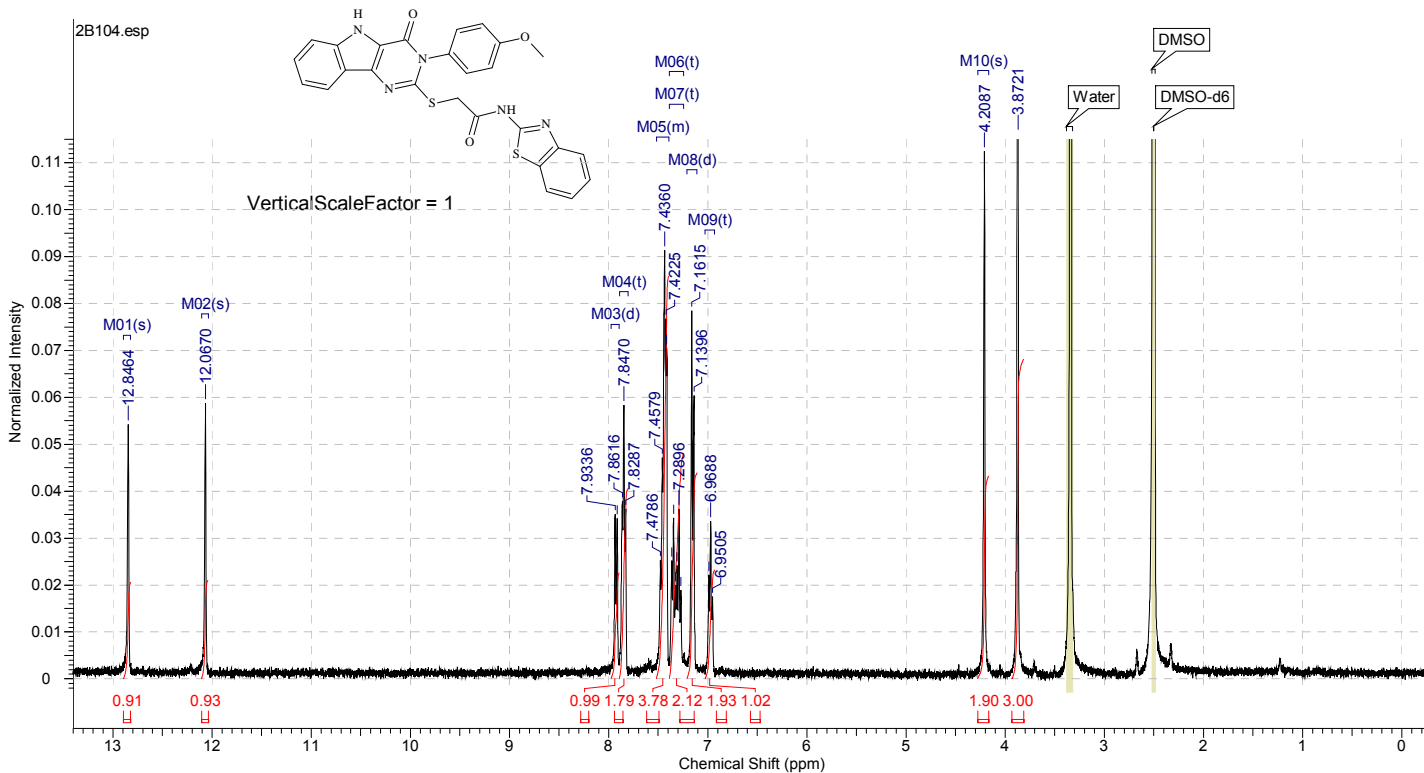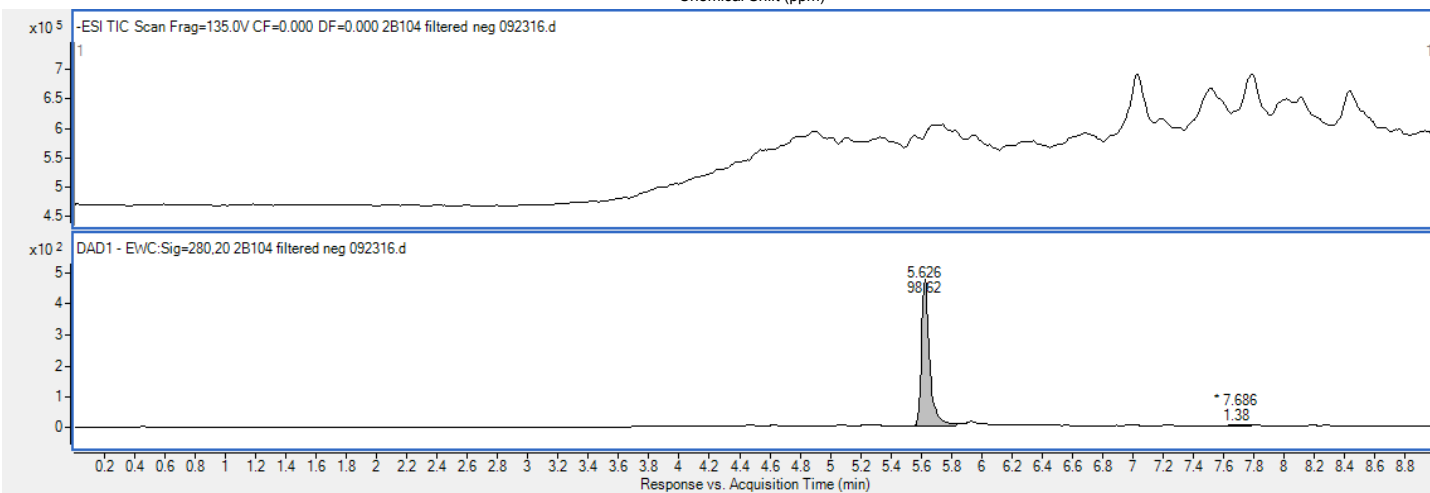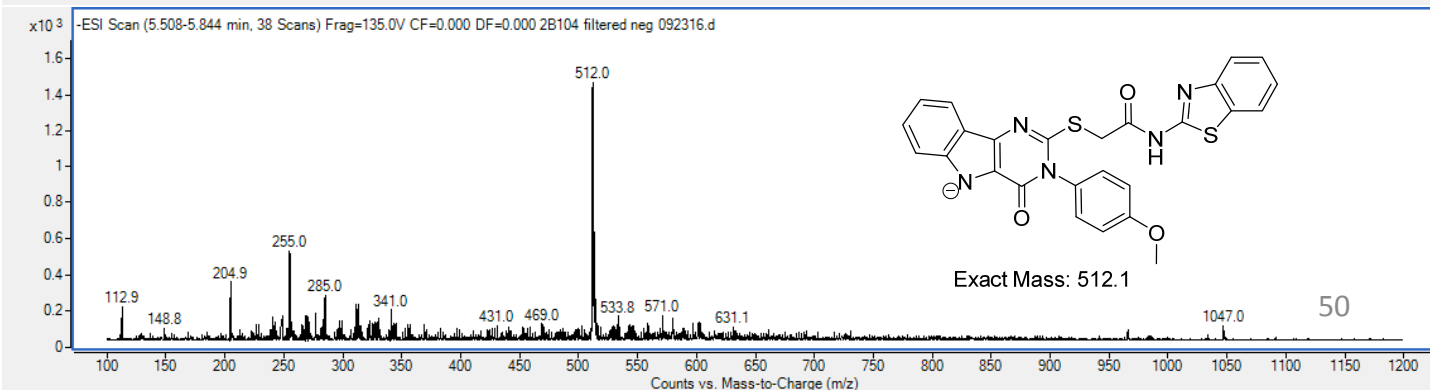

# <sup>1</sup>H NMR, LC-MS

# 6{3,5}

4/20/2017 11:44:05 AM

| Acquisition Time (sec) | 2.0179      | Comment        | STANDARD 1H OBSERVE                                                    |                      | Date    | Dec 23 2016            |                     |
|------------------------|-------------|----------------|------------------------------------------------------------------------|----------------------|---------|------------------------|---------------------|
| Date Stamp             | Dec 23 2016 | File Name      | C:\Documents and Settings\Mycoahhh\My Documents\NMR\mchan\2b93.fid.fid |                      |         |                        |                     |
| Frequency (MHz)        | 400.05      | Nucleus        | 1H                                                                     | Number of Transients | 16      | Original Points Count  | 16130               |
| Points Count           | 16384       | Pulse Sequence | s2pul                                                                  | Receiver Gain        | 20.00   | Solvent                | DMSO-d6             |
| Spectrum Offset (Hz)   | 1961.0773   | Spectrum Type  | STANDARD                                                               | Sweep Width (Hz)     | 7993.60 | Temperature (degree C) | AMBIENT TEMPERATURE |

<sup>1</sup>H NMR (400 MHz, DMSO-d<sub>6</sub>) δ 12.91 (s, 1H), 11.86 (br. s., 1H), 7.91 (d, *J* = 7.81 Hz, 1H), 7.85 (d, *J* = 7.81 Hz, 1H), 7.79 (d, *J* = 7.81 Hz, 1H), 7.46 (t, *J* = 7.56 Hz, 1H), 7.40 (d, *J* = 8.29 Hz, 1H), 7.24 - 7.34 (m, *J* = 6.80 Hz, 2H), 6.89 (t, *J* = 7.56 Hz, 1H), 4.59 - 4.75 (m, 1H), 4.34 (s, 2H), 1.67 (d, *J* = 6.83 Hz, 6H)

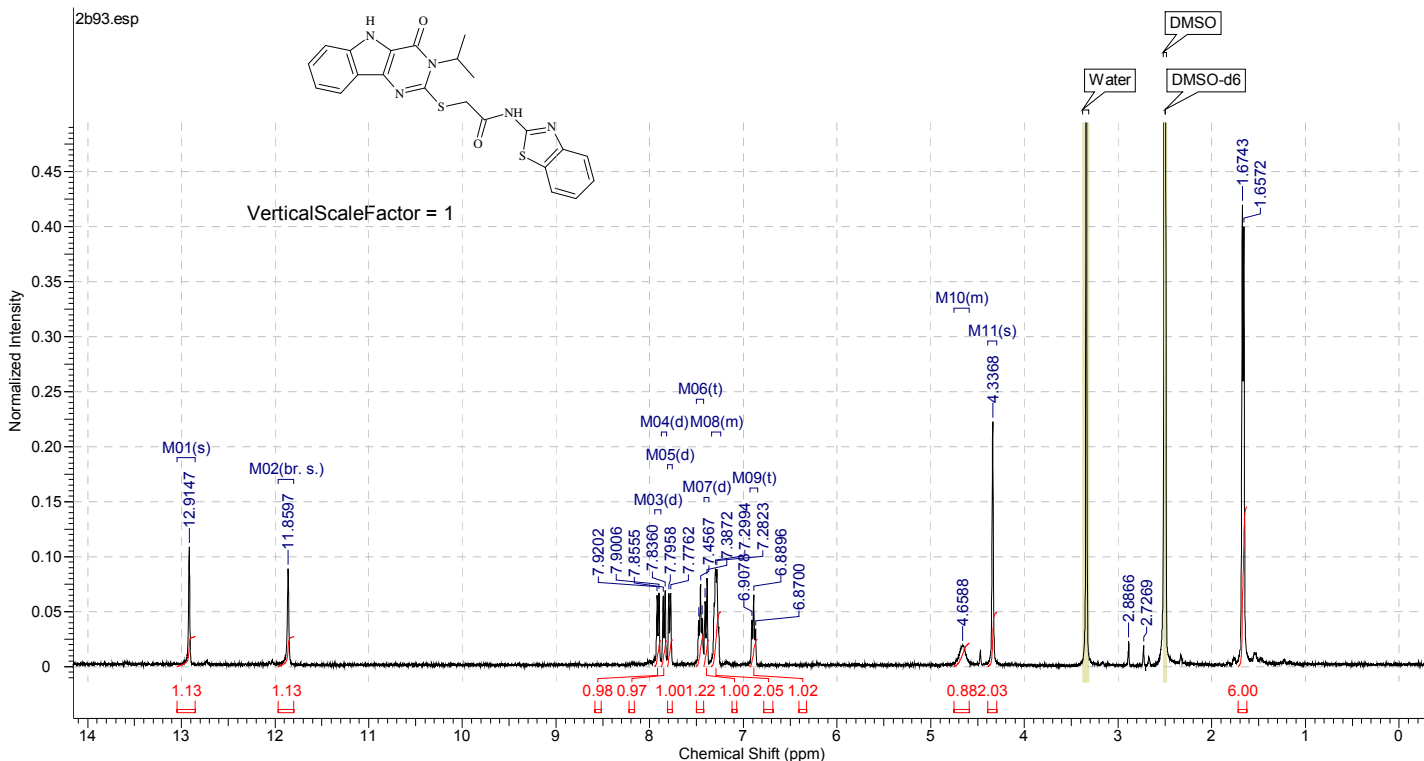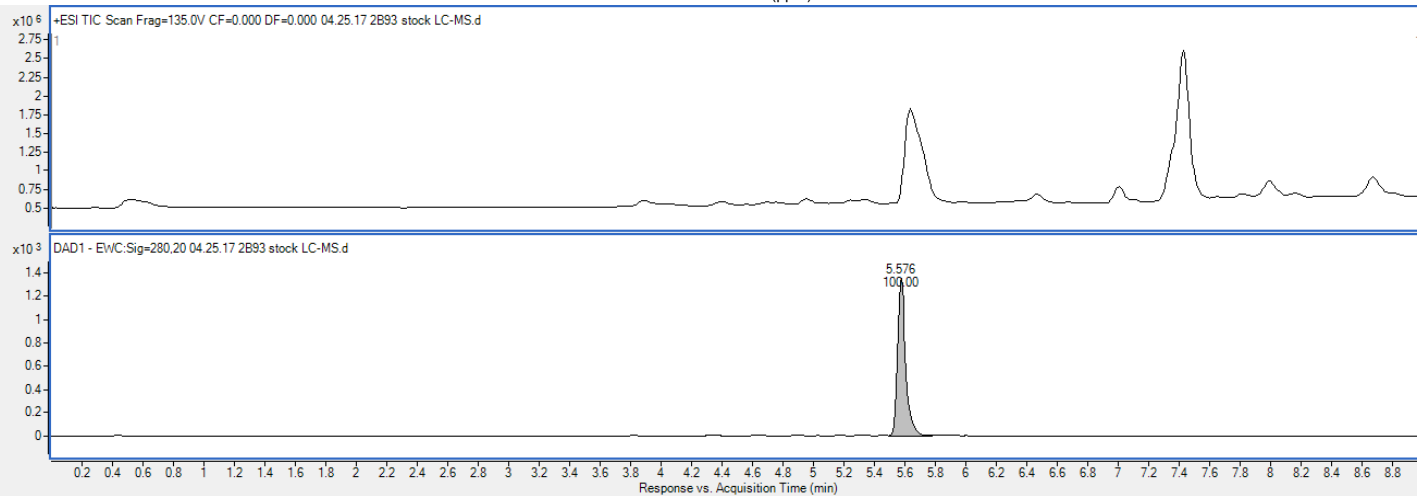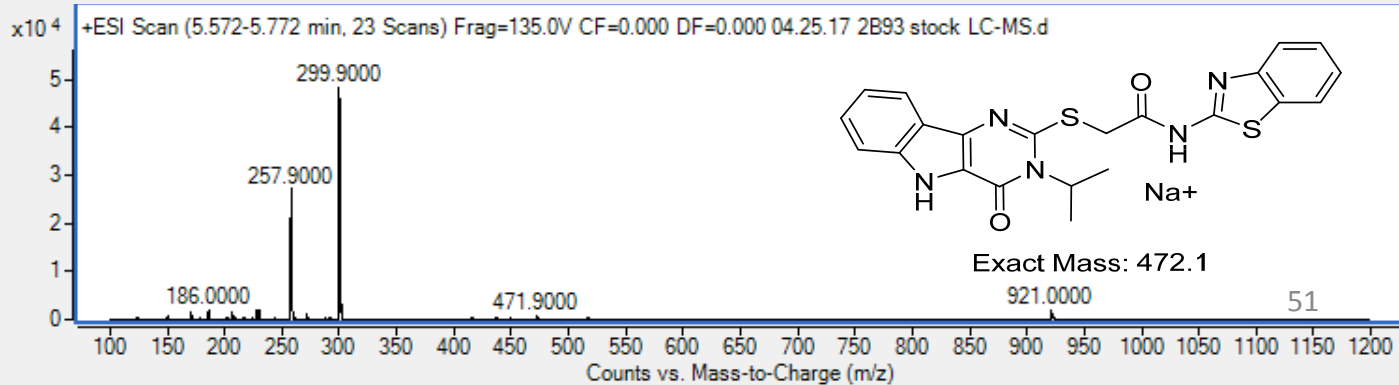

# <sup>1</sup>H NMR, LC-MS

# 6{4,5}

4/20/2017 11:50:06 AM

| Acquisition Time (sec) | 2.0032      | Comment        | STANDARD 1H OBSERVE                                                    |                      | Date    | Dec 23 2016            |                     |
|------------------------|-------------|----------------|------------------------------------------------------------------------|----------------------|---------|------------------------|---------------------|
| Date Stamp             | Dec 23 2016 | File Name      | C:\Documents and Settings\Mycoahhh\My Documents\NMR\mchan\2b50.fid\fid |                      |         |                        |                     |
| Frequency (MHz)        | 400.05      | Nucleus        | 1H                                                                     | Number of Transients | 16      | Original Points Count  | 16013               |
| Points Count           | 16384       | Pulse Sequence | s2pul                                                                  | Receiver Gain        | 20.00   | Solvent                | DMSO-d6             |
| Spectrum Offset (Hz)   | 1961.5652   | Spectrum Type  | STANDARD                                                               | Sweep Width (Hz)     | 7993.60 | Temperature (degree C) | AMBIENT TEMPERATURE |

<sup>1</sup>H NMR (400 MHz, DMSO-d<sub>6</sub>) δ 12.90 (s, 1H), 11.96 (s, 1H), 7.91 (d, *J* = 7.81 Hz, 1H), 7.84 (d, *J* = 8.10 Hz, 1H), 7.81 (d, *J* = 8.10 Hz, 1H), 7.45 (t, *J* = 7.81 Hz, 1H), 7.41 (d, *J* = 8.78 Hz, 1H), 7.32 (t, *J* = 7.30 Hz, 1H), 7.28 (t, *J* = 7.30 Hz, 1H), 6.92 (t, *J* = 7.56 Hz, 1H), 4.39 (s, 2H), 3.63 (s, 3H)

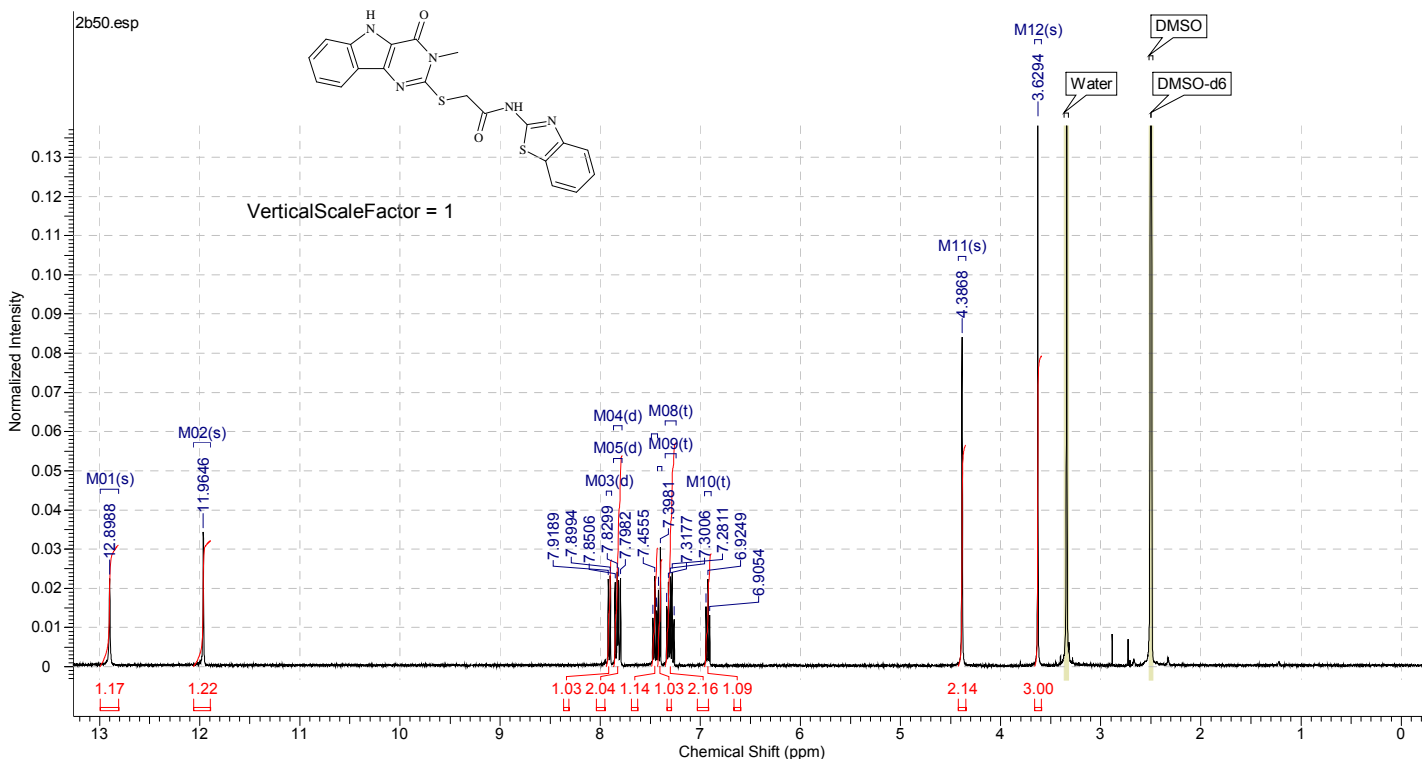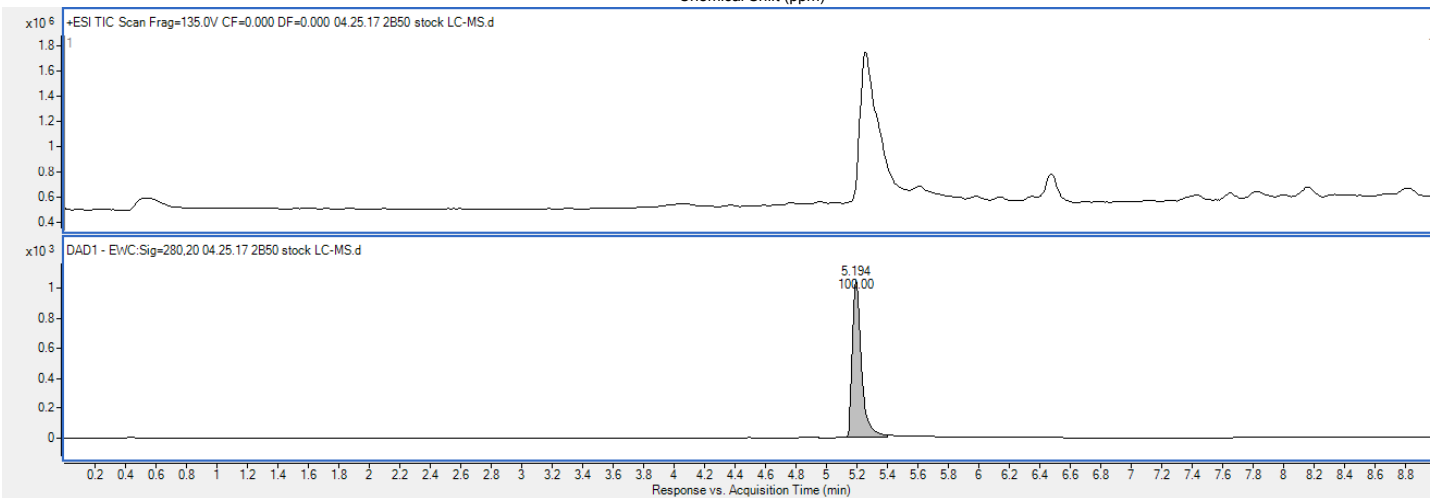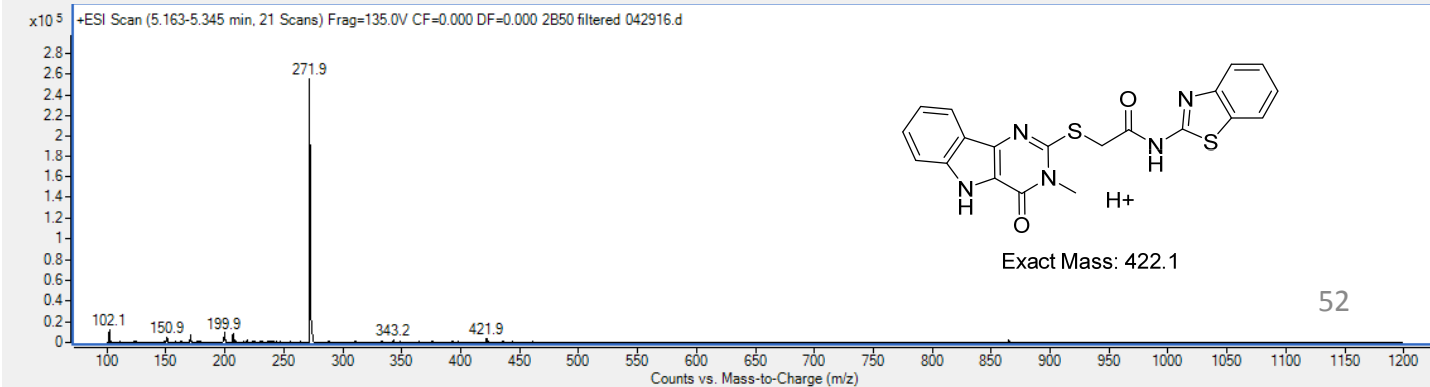

# <sup>1</sup>H NMR, LC-MS

## 6{5,5}

4/20/2017 11:59:21 AM

| Acquisition Time (sec) | 2.0162      | Comment        | STANDARD 1H OBSERVE                                                      |                      | Date    | Dec 23 2016            |                     |
|------------------------|-------------|----------------|--------------------------------------------------------------------------|----------------------|---------|------------------------|---------------------|
| Date Stamp             | Dec 23 2016 | File Name      | C:\Documents and Settings\Mycoahhh\My Documents\NMR\michan\2B114.fid\fid |                      |         |                        |                     |
| Frequency (MHz)        | 400.05      | Nucleus        | 1H                                                                       | Number of Transients | 16      | Original Points Count  | 16117               |
| Points Count           | 16384       | Pulse Sequence | s2pul                                                                    | Receiver Gain        | 20.00   | Solvent                | DMSO-d6             |
| Spectrum Offset (Hz)   | 1960.5895   | Spectrum Type  | STANDARD                                                                 | Sweep Width (Hz)     | 7993.60 | Temperature (degree C) | AMBIENT TEMPERATURE |

<sup>1</sup>H NMR (400 MHz, DMSO-d<sub>6</sub>) δ 12.91 (br. s., 1H), 11.96 (s, 1H), 7.91 (d, *J* = 7.81 Hz, 1H), 7.82 (dd, *J* = 8.29, 16.59 Hz, 2H), 7.46 (t, *J* = 7.80 Hz, 1H), 7.41 (d, *J* = 8.29 Hz, 1H), 7.32 (t, *J* = 7.40 Hz, 1H), 7.28 (t, *J* = 7.50 Hz, 1H), 6.92 (t, *J* = 7.32 Hz, 1H), 4.38 (s, 2H), 4.21 (q, *J* = 7.30 Hz, 2H), 1.35 (t, *J* = 6.83 Hz, 3H)

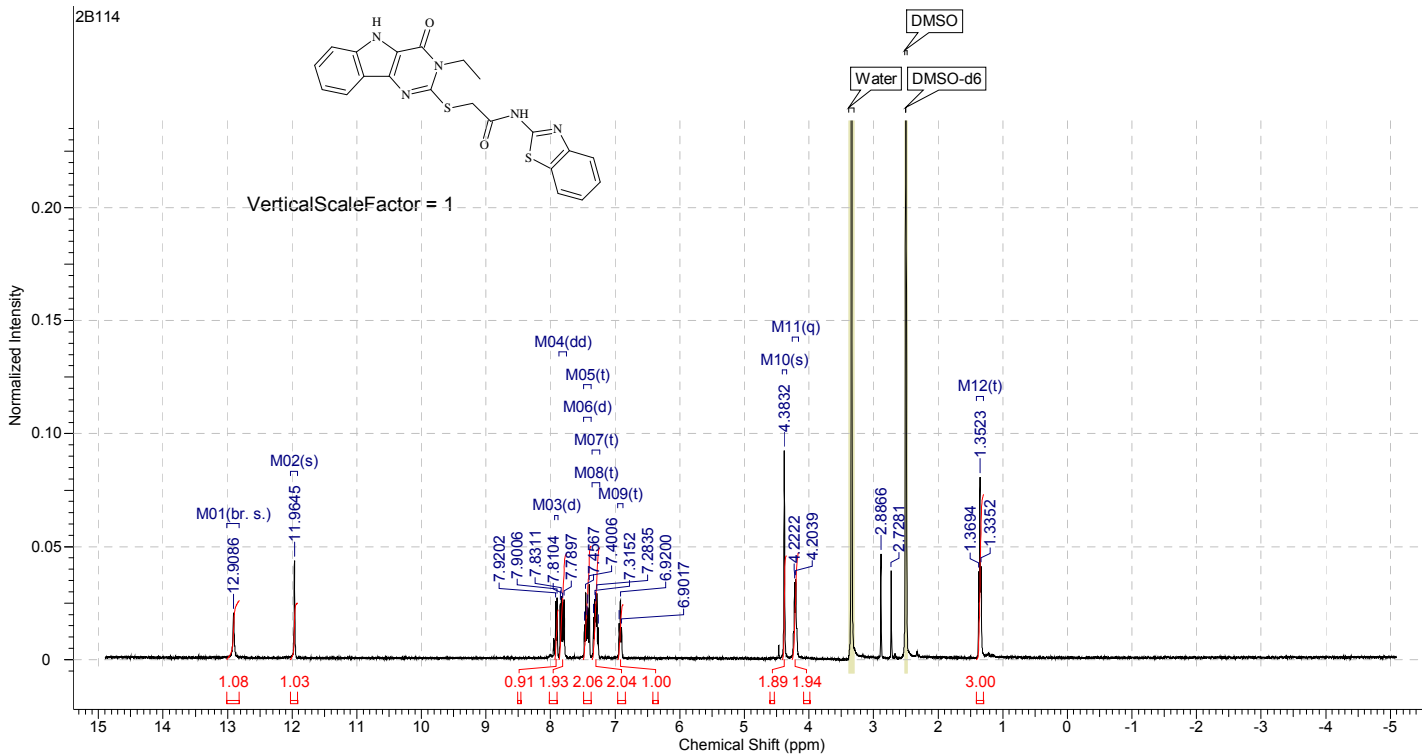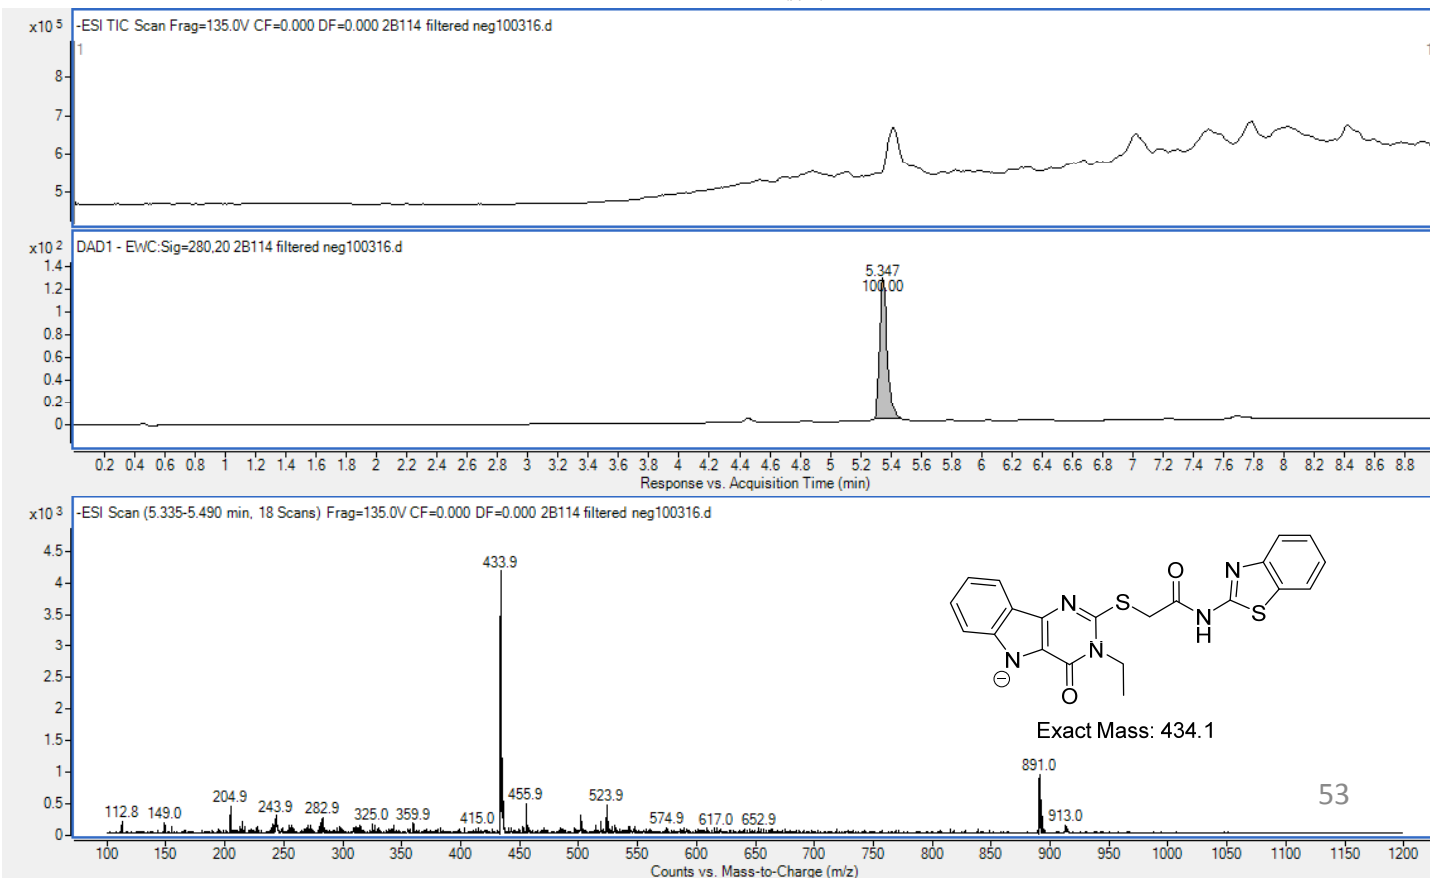

# <sup>1</sup>H NMR, LC-MS

## 6{6,5}

4/20/2017 12:14:53 PM

| Acquisition Time (sec) | 2.0016      | Comment        | STANDARD 1H OBSERVE                                                     |                      | Date    | Dec 23 2016            |                     |
|------------------------|-------------|----------------|-------------------------------------------------------------------------|----------------------|---------|------------------------|---------------------|
| Date Stamp             | Dec 23 2016 | File Name      | C:\Documents and Settings\Mycoahhh\My Documents\NMR\mchan\2b129.fid\fid |                      |         |                        |                     |
| Frequency (MHz)        | 400.05      | Nucleus        | 1H                                                                      | Number of Transients | 16      | Original Points Count  | 15987               |
| Points Count           | 16384       | Pulse Sequence | s2pul                                                                   | Receiver Gain        | 20.00   | Solvent                | DMSO-d6             |
| Spectrum Offset (Hz)   | 1961.7723   | Spectrum Type  | STANDARD                                                                | Sweep Width (Hz)     | 7987.22 | Temperature (degree C) | AMBIENT TEMPERATURE |

<sup>1</sup>H NMR (400 MHz, DMSO-d<sub>6</sub>) δ 12.91 (s, 1H), 11.97 (s, 1H), 7.91 (d, *J* = 7.80 Hz, 1H), 7.82 (dd, *J* = 8.29, 14.63 Hz, 2H), 7.46 (t, *J* = 7.56 Hz, 1H), 7.41 (d, *J* = 8.29 Hz, 1H), 7.32 (t, *J* = 7.80 Hz, 1H), 7.28 (t, *J* = 7.80 Hz, 1H), 6.92 (t, *J* = 7.56 Hz, 1H), 4.38 (s, 2H), 4.12 (t, *J* = 7.80 Hz, 2H), 1.79 (sxt, *J* = 7.80 Hz, 2H), 0.99 (t, *J* = 7.31 Hz, 3H)

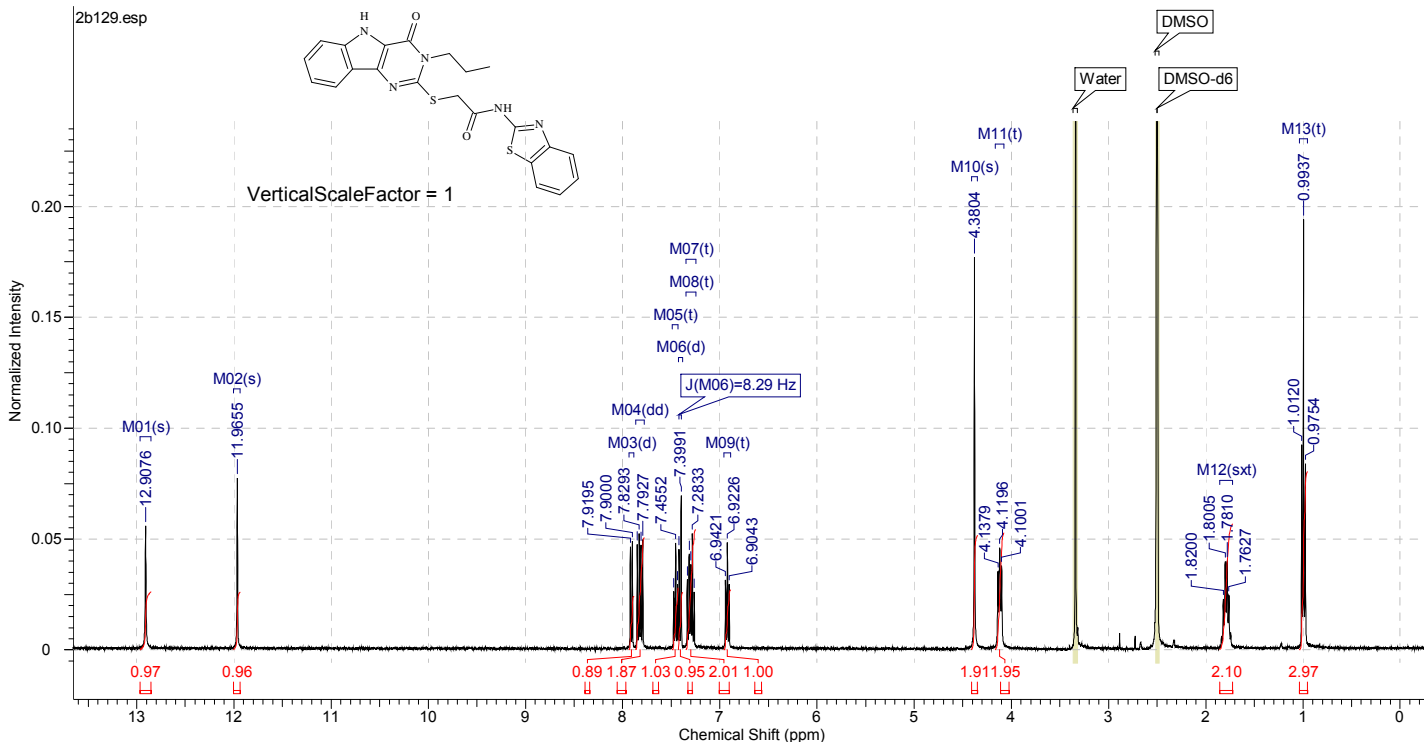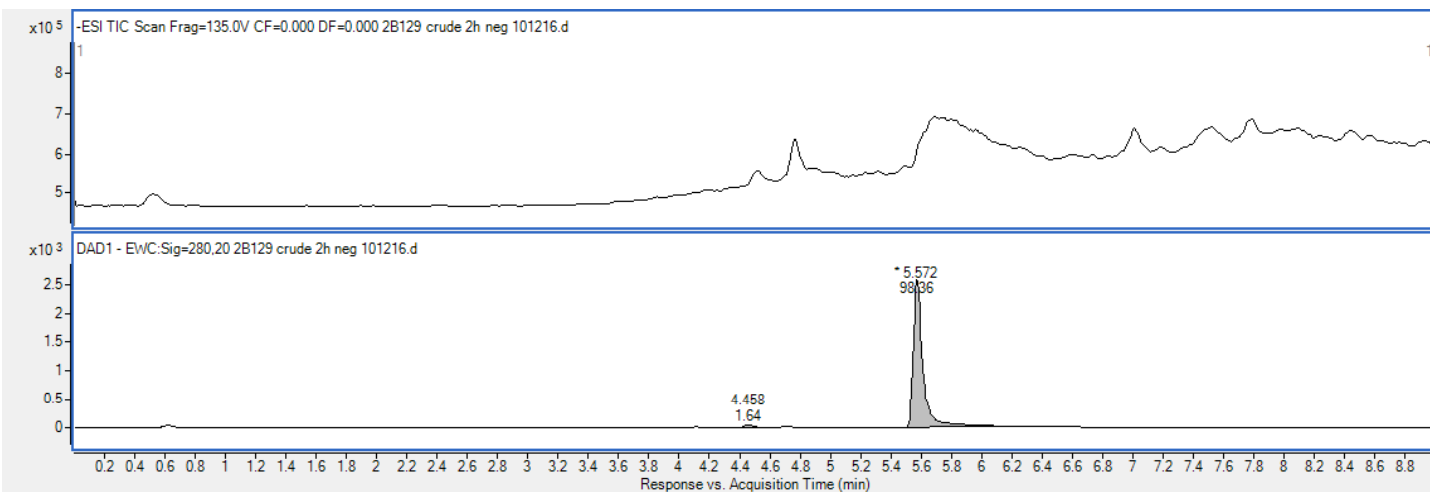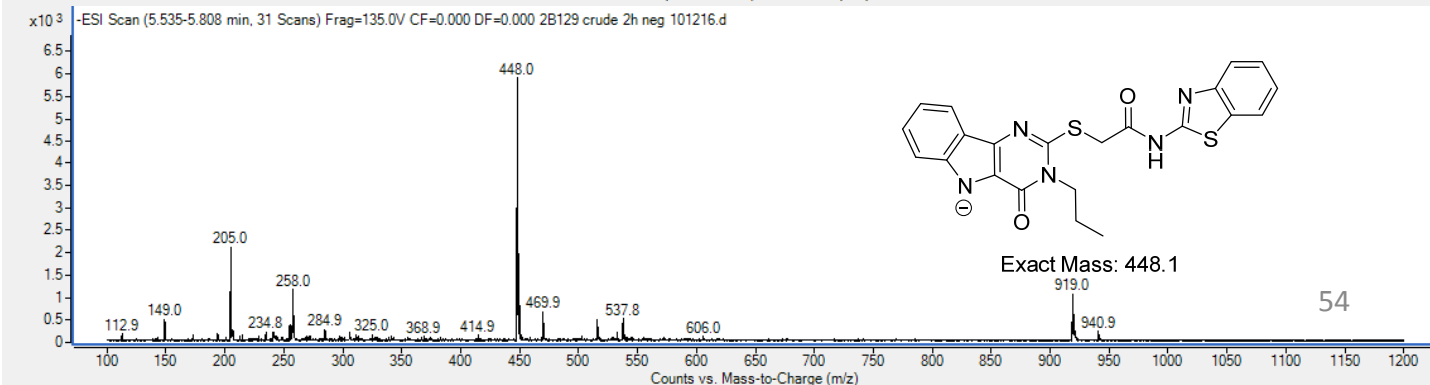

# <sup>1</sup>H, <sup>13</sup>C NMR

# 6{7,5}

4/20/2017 12:20:47 PM

|                        |             |                |                                                                         |                        |                     |
|------------------------|-------------|----------------|-------------------------------------------------------------------------|------------------------|---------------------|
| Acquisition Time (sec) | 1.9983      | Comment        | STANDARD 1H OBSERVE                                                     | Date                   | Dec 23 2016         |
| Date Stamp             | Dec 23 2016 | File Name      | C:\Documents and Settings\Mycoahhh\My Documents\NMR\mchan\2B108.fid\fid |                        |                     |
| Frequency (MHz)        | 400.05      | Nucleus        | 1H                                                                      | Number of Transients   | 16                  |
| Points Count           | 16384       | Pulse Sequence | s2pul                                                                   | Receiver Gain          | 20.00               |
| Spectrum Offset (Hz)   | 1961.7723   | Spectrum Type  | STANDARD                                                                | Sweep Width (Hz)       | 7987.22             |
|                        |             |                |                                                                         | Solvent                | DMSO-d6             |
|                        |             |                |                                                                         | Temperature (degree C) | AMBIENT TEMPERATURE |

<sup>1</sup>H NMR (400 MHz, DMSO-d<sub>6</sub>) δ 12.91 (s, 1H), 11.96 (s, 1H), 7.91 (d, J = 7.80 Hz, 1H), 7.82 (dd, J = 8.04, 16.82 Hz, 2H), 7.46 (t, J = 7.30 Hz, 1H), 7.41 (d, J = 8.29 Hz, 1H), 7.30 (td, J = 7.31, 12.68 Hz, 2H), 6.92 (t, J = 7.31 Hz, 1H), 4.38 (s, 2H), 4.16 (t, J = 7.80 Hz, 2H), 1.75 (quin, J = 7.68 Hz, 2H), 1.43 (sxt, J = 7.41 Hz, 2H), 0.98 (t, J = 7.31 Hz, 3H)

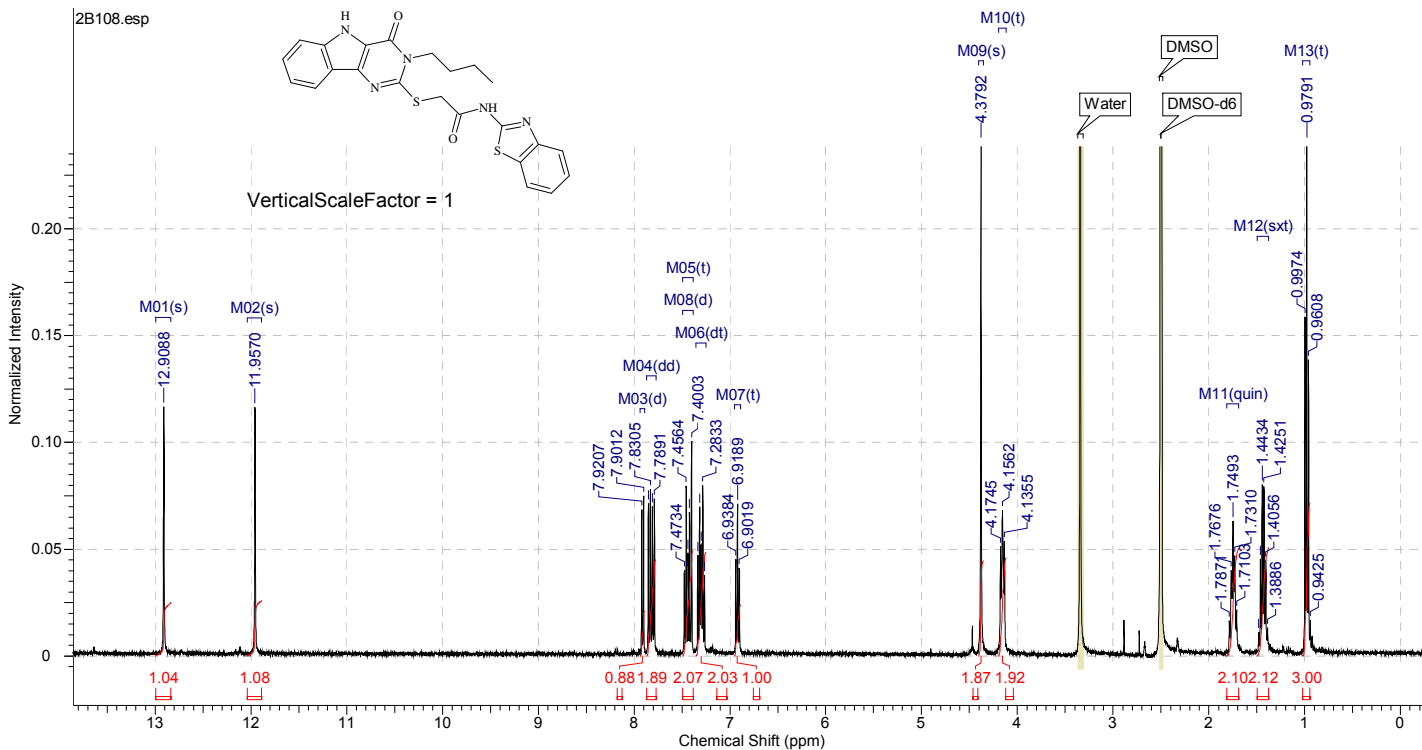

4/21/2017 11:10:53 AM

|                        |            |                |                                                                            |                        |            |
|------------------------|------------|----------------|----------------------------------------------------------------------------|------------------------|------------|
| Acquisition Time (sec) | 1.3005     | Comment        | Std carbon                                                                 | Date                   | Apr 6 2017 |
| Date Stamp             | Apr 6 2017 | File Name      | C:\Documents and Settings\Mycoahhh\My Documents\NMR\C13 fids\2b108.fid\fid | Date Stamp             | Apr 6 2017 |
| Frequency (MHz)        | 125.69     | Nucleus        | 13C                                                                        | Number of Transients   | 32         |
| Points Count           | 65536      | Pulse Sequence | s2pul                                                                      | Receiver Gain          | 60.00      |
| Spectrum Offset (Hz)   | 12549.8545 | Spectrum Type  | STANDARD                                                                   | Sweep Width (Hz)       | 30487.80   |
|                        |            |                |                                                                            | Solvent                | BENZENE-d6 |
|                        |            |                |                                                                            | Temperature (degree C) | 35.000     |

<sup>13</sup>C NMR (126 MHz, BENZENE-d<sub>6</sub>) δ 167.9, 158.1, 154.5, 150.9, 148.7, 138.8, 136.7, 131.4, 127.1, 126.1, 123.5, 121.7, 120.5, 120.1, 120.1, 119.7, 118.9, 112.6, 43.9, 35.9, 29.9, 19.6, 13.6

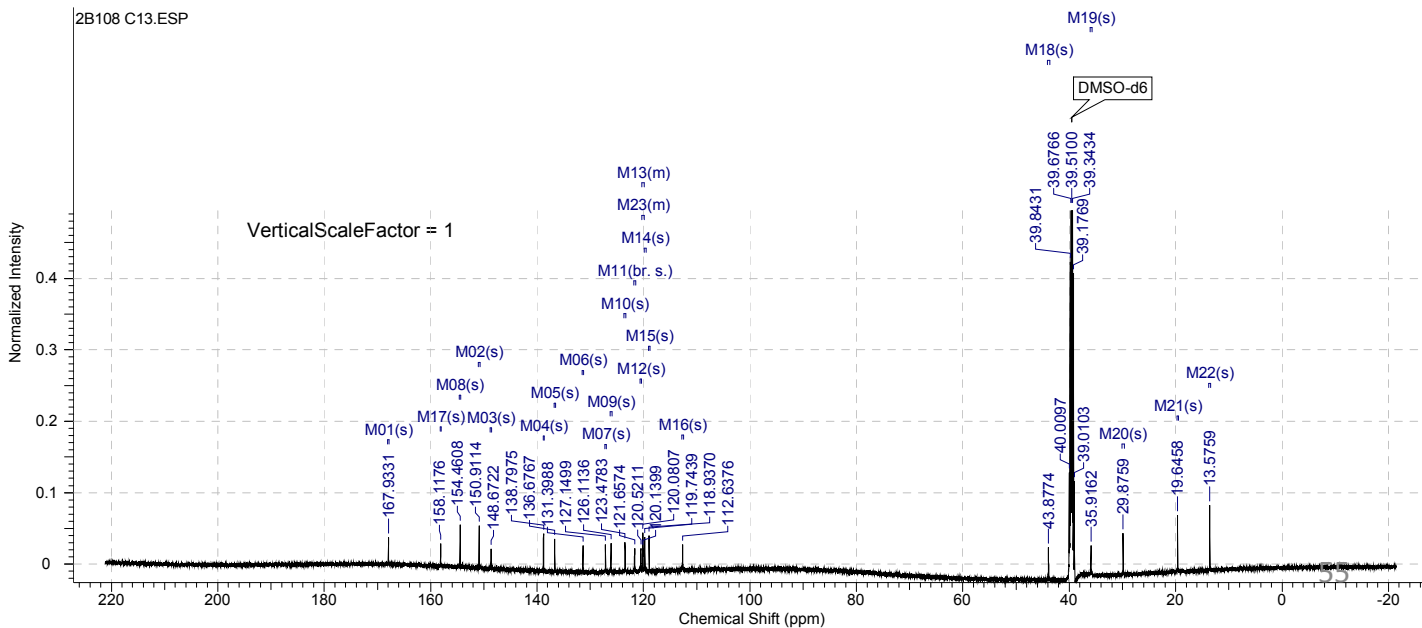

# LC-MS and HRMS

## 6{7,5}

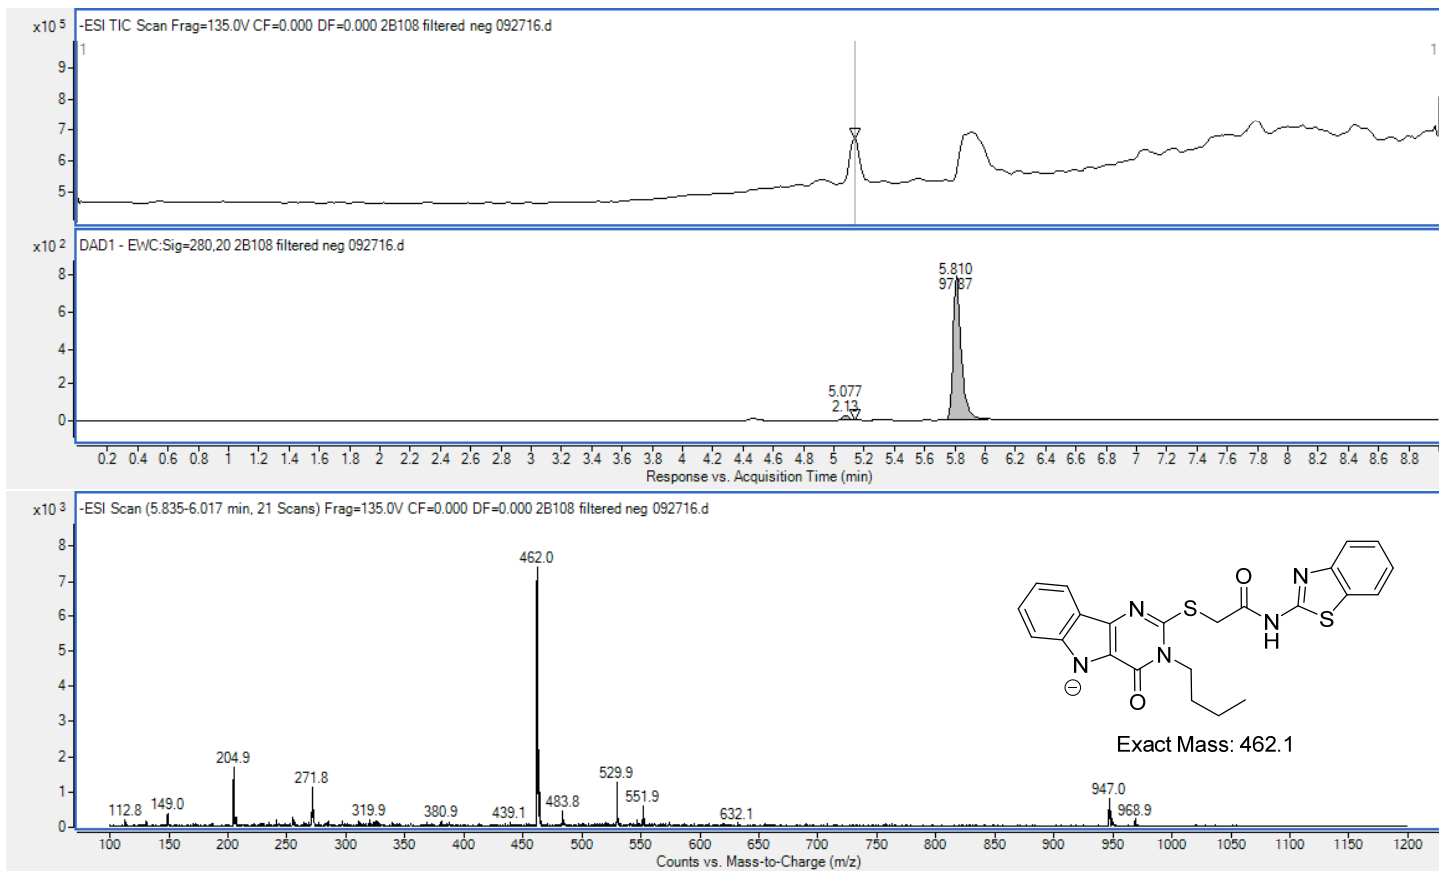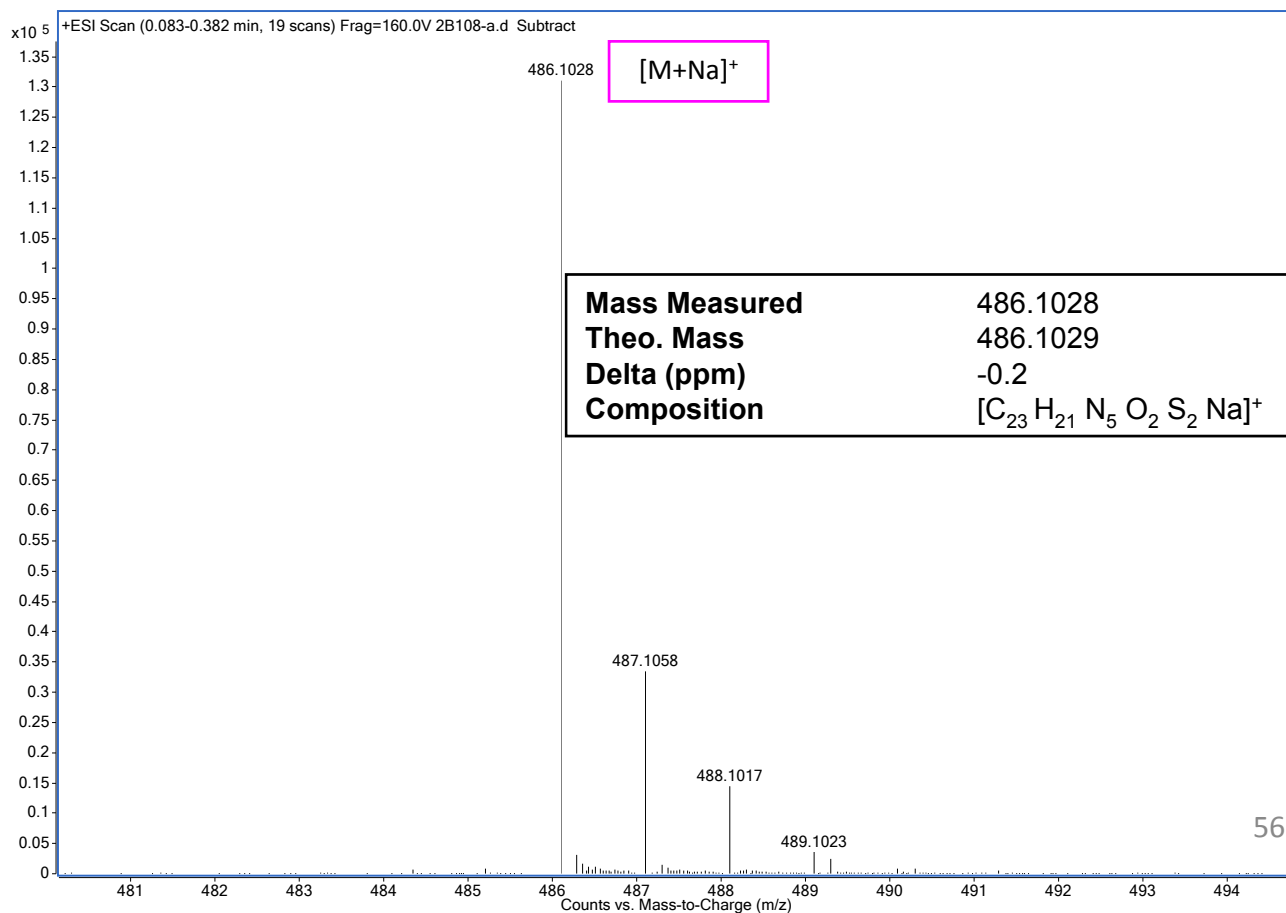



# <sup>1</sup>H, <sup>13</sup>C NMR

# 6{1,6}

4/20/2017 12:29:28 PM

|                        |             |                |                                                                          |                        |                     |
|------------------------|-------------|----------------|--------------------------------------------------------------------------|------------------------|---------------------|
| Acquisition Time (sec) | 2.0065      | Comment        | STANDARD 1H OBSERVE                                                      | Date                   | Dec 23 2016         |
| Date Stamp             | Dec 23 2016 | File Name      | C:\Documents and Settings\Mycoahhh\My Documents\NMR\michan\2b100.fid\fid |                        |                     |
| Frequency (MHz)        | 400.05      | Nucleus        | <sup>1</sup> H                                                           | Number of Transients   | 16                  |
| Points Count           | 16384       | Pulse Sequence | s2pul                                                                    | Receiver Gain          | 20.00               |
| Spectrum Offset (Hz)   | 1960.1014   | Spectrum Type  | STANDARD                                                                 | Sweep Width (Hz)       | 7993.60             |
|                        |             |                |                                                                          | Solvent                | DMSO-d6             |
|                        |             |                |                                                                          | Temperature (degree C) | AMBIENT TEMPERATURE |

<sup>1</sup>H NMR (400 MHz, DMSO-d<sub>6</sub>) δ 12.77 (br. s., 1H), 12.10 (br. s., 1H), 7.86 (d, *J* = 8.29 Hz, 1H), 7.67 - 7.76 (m, 2H), 7.56 - 7.66 (m, *J* = 3.90 Hz, 2H), 7.41 - 7.53 (m, *J* = 8.30, 16.60 Hz, 3H), 7.35 (t, *J* = 7.40 Hz, 1H), 7.27 (d, *J* = 8.29 Hz, 1H), 6.98 (t, *J* = 7.30 Hz, 1H), 4.22 (s, 2H), 2.39 (s, 3H)

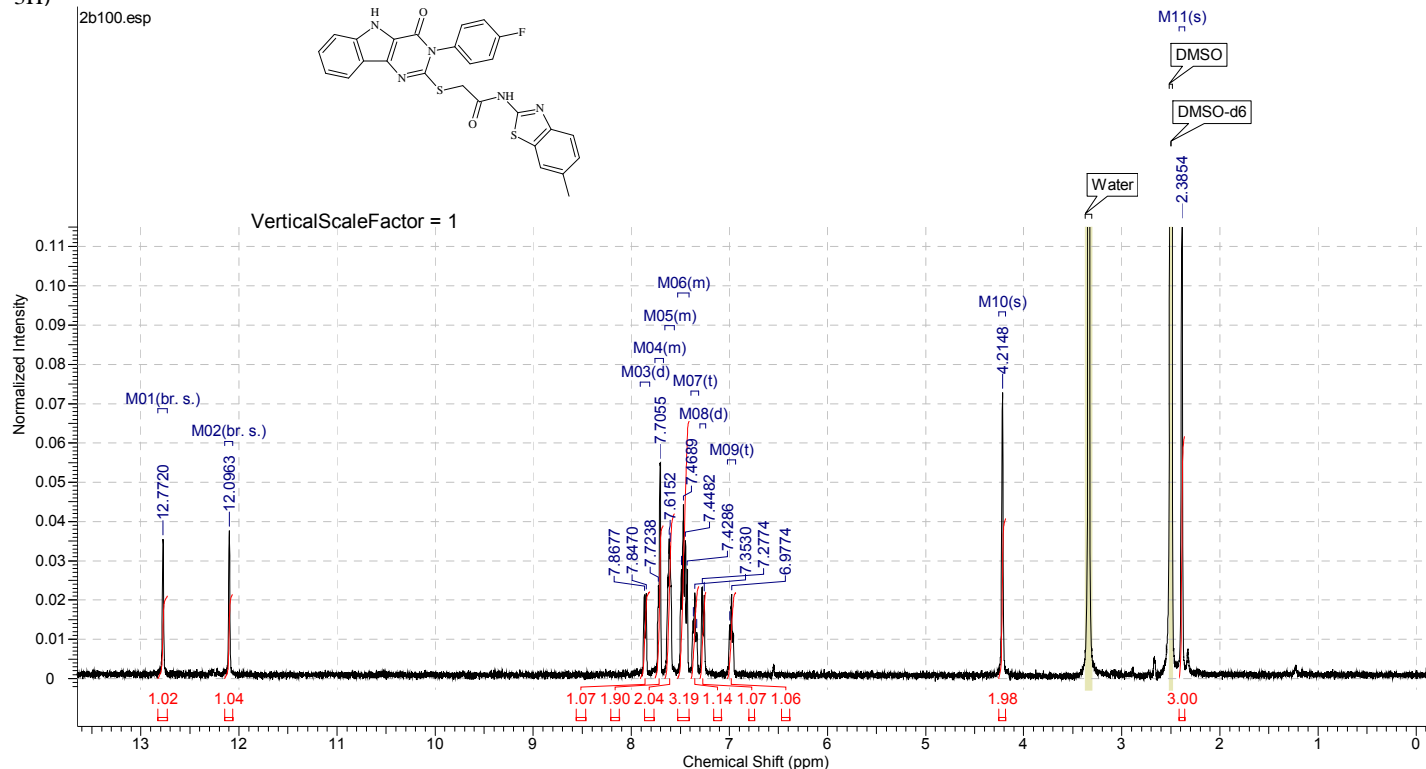

4/24/2017 2:55:19 PM

|                        |                                                                            |         |            |      |             |                        |             |
|------------------------|----------------------------------------------------------------------------|---------|------------|------|-------------|------------------------|-------------|
| Acquisition Time (sec) | 1.3005                                                                     | Comment | Std carbon | Date | Apr 24 2017 | Date Stamp             | Apr 24 2017 |
| File Name              | C:\Documents and Settings\Mycoahhh\My Documents\NMR\C13 fids\2b100.fid\fid |         |            |      |             | Frequency (MHz)        | 125.69      |
| Nucleus                | <sup>13</sup> C                                                            |         |            |      |             | Points Count           | 65536       |
| Pulse Sequence         | s2pul                                                                      |         |            |      |             | Spectrum Offset (Hz)   | 13134.6514  |
| Spectrum Type          | STANDARD                                                                   |         |            |      |             | Temperature (degree C) | 30.000      |

<sup>13</sup>C NMR (126 MHz, DMSO-d<sub>6</sub>) δ 167.7, 163.6, 161.6, 157.2, 154.9, 152.1, 146.6, 138.8, 137.0, 132.9, 132.2, 132.0, 131.9, 131.5, 127.4, 127.2, 121.3, 120.2, 120.0, 119.1, 116.6, 116.5, 112.7, 104.5, 36.3, 20.9

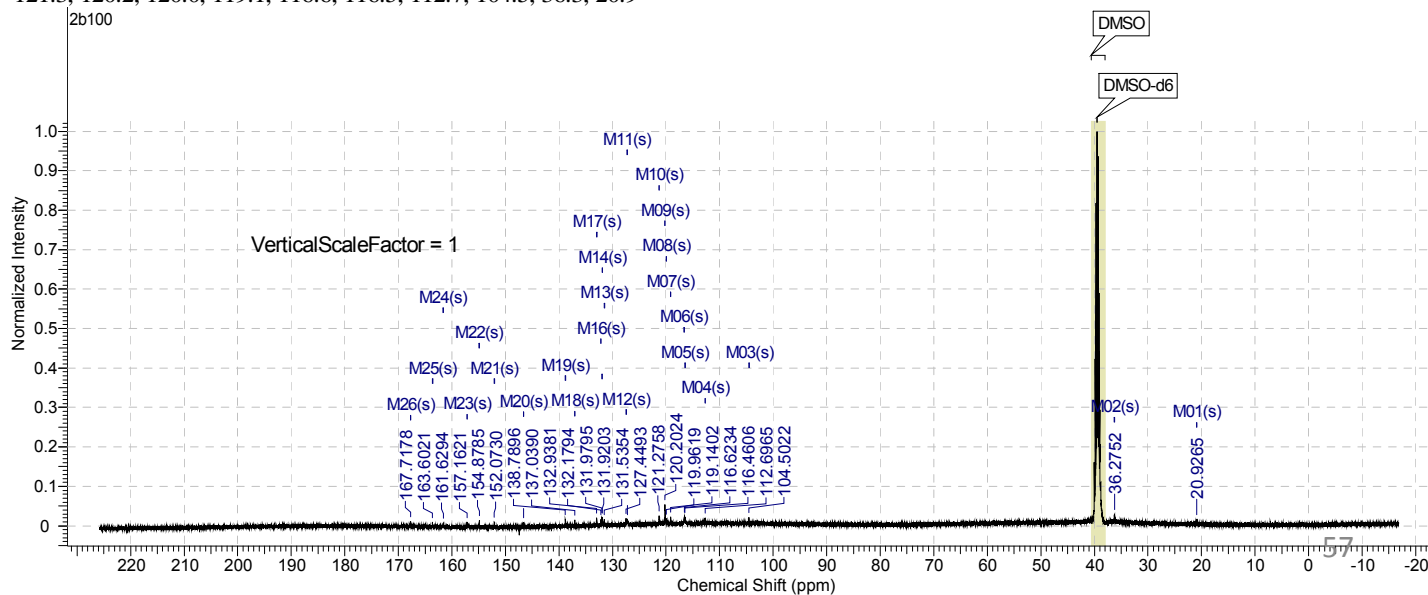

# LC-MS and HRMS

## 6{1,6}

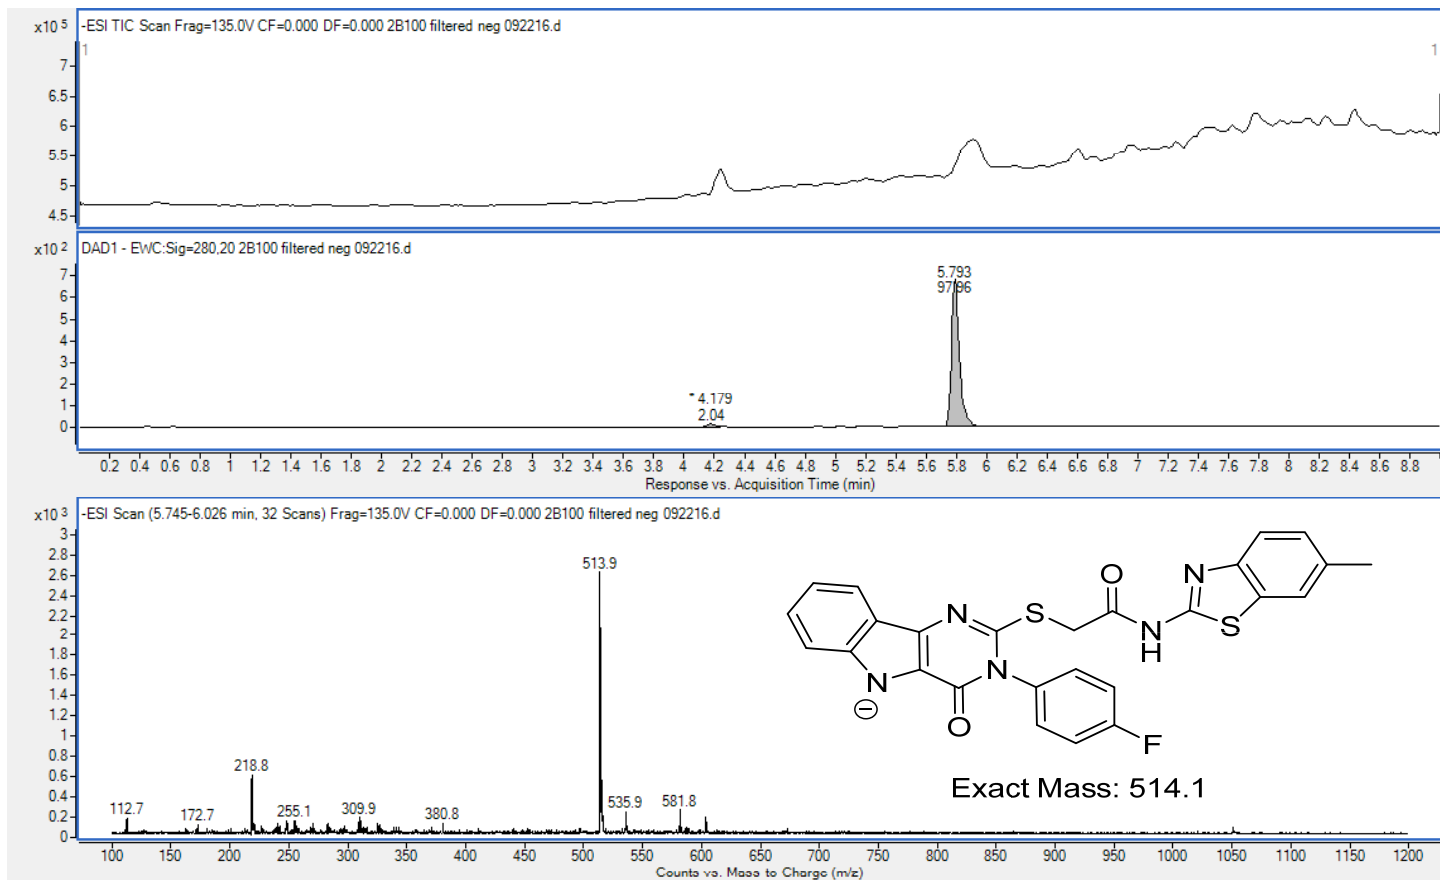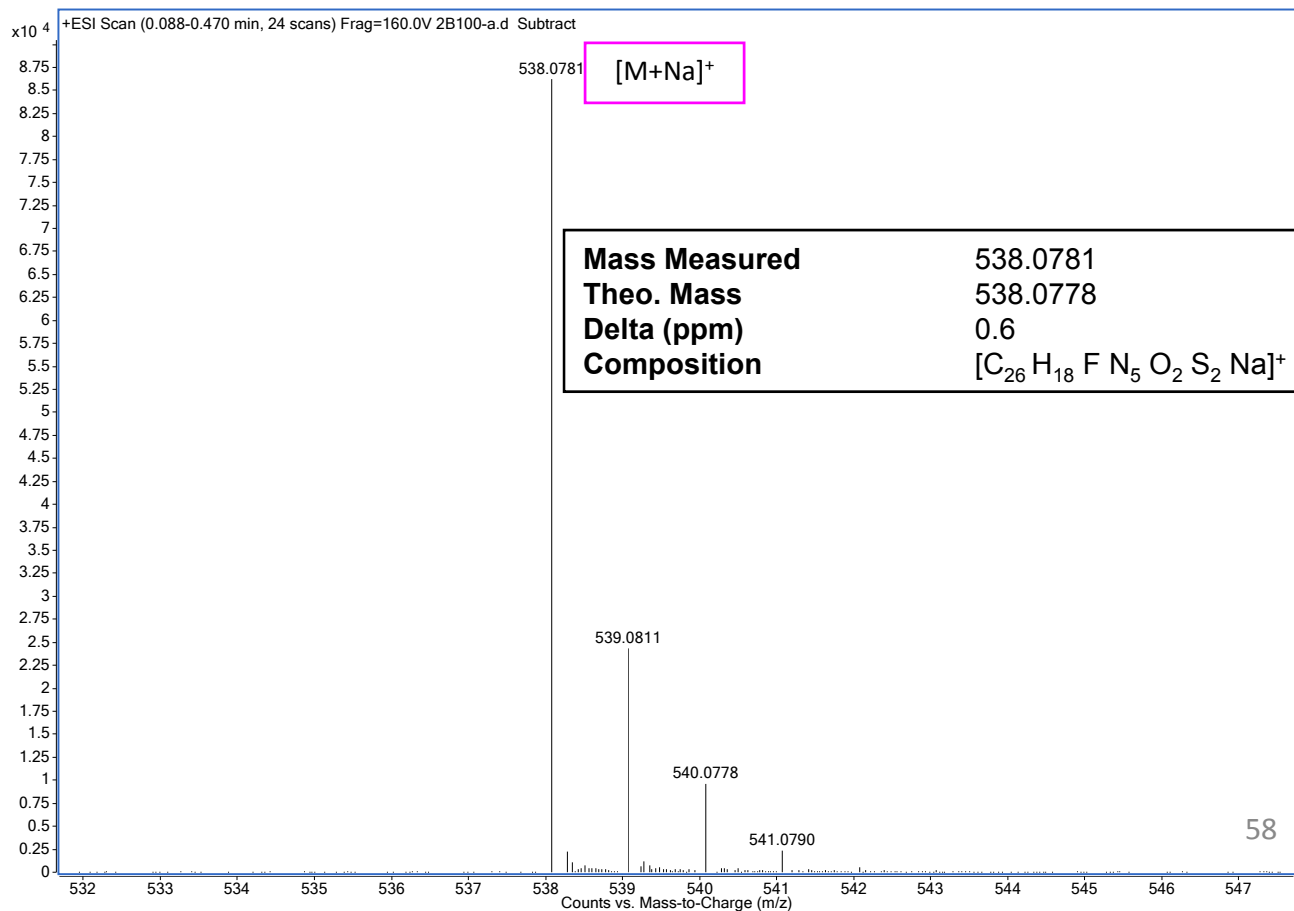

# <sup>1</sup>H, <sup>13</sup>C NMR

# 6{2,6}

4/20/2017 12:33:31 PM

| Acquisition Time (sec) | 2.0146      | Comment        | STANDARD 1H OBSERVE                                                      | Date                   | Dec 23 2016         |
|------------------------|-------------|----------------|--------------------------------------------------------------------------|------------------------|---------------------|
| Date Stamp             | Dec 23 2016 | File Name      | C:\Documents and Settings\Mycoahhh\My Documents\NMR\michan\2b105.fid\fid |                        |                     |
| Frequency (MHz)        | 400.05      | Nucleus        | 1H                                                                       | Number of Transients   | 16                  |
| Points Count           | 16384       | Pulse Sequence | s2pul                                                                    | Receiver Gain          | 20.00               |
| Spectrum Offset (Hz)   | 1961.0773   | Spectrum Type  | STANDARD                                                                 | Sweep Width (Hz)       | 7993.60             |
|                        |             |                |                                                                          | Solvent                | DMSO-d6             |
|                        |             |                |                                                                          | Temperature (degree C) | AMBIENT TEMPERATURE |

<sup>1</sup>H NMR (400 MHz, DMSO-d<sub>6</sub>) δ 12.76 (s, 1H), 12.06 (s, 1H), 7.86 (d, J = 8.29 Hz, 1H), 7.68 - 7.76 (m, 2H), 7.39 - 7.48 (m, 3H), 7.31 - 7.38 (m, 1H), 7.27 (d, J = 8.29 Hz, 1H), 7.10 - 7.19 (m, 2H), 6.98 (t, J = 7.32 Hz, 1H), 4.19 (s, 2H), 3.87 (s, 3H), 2.39 (s, 3H)

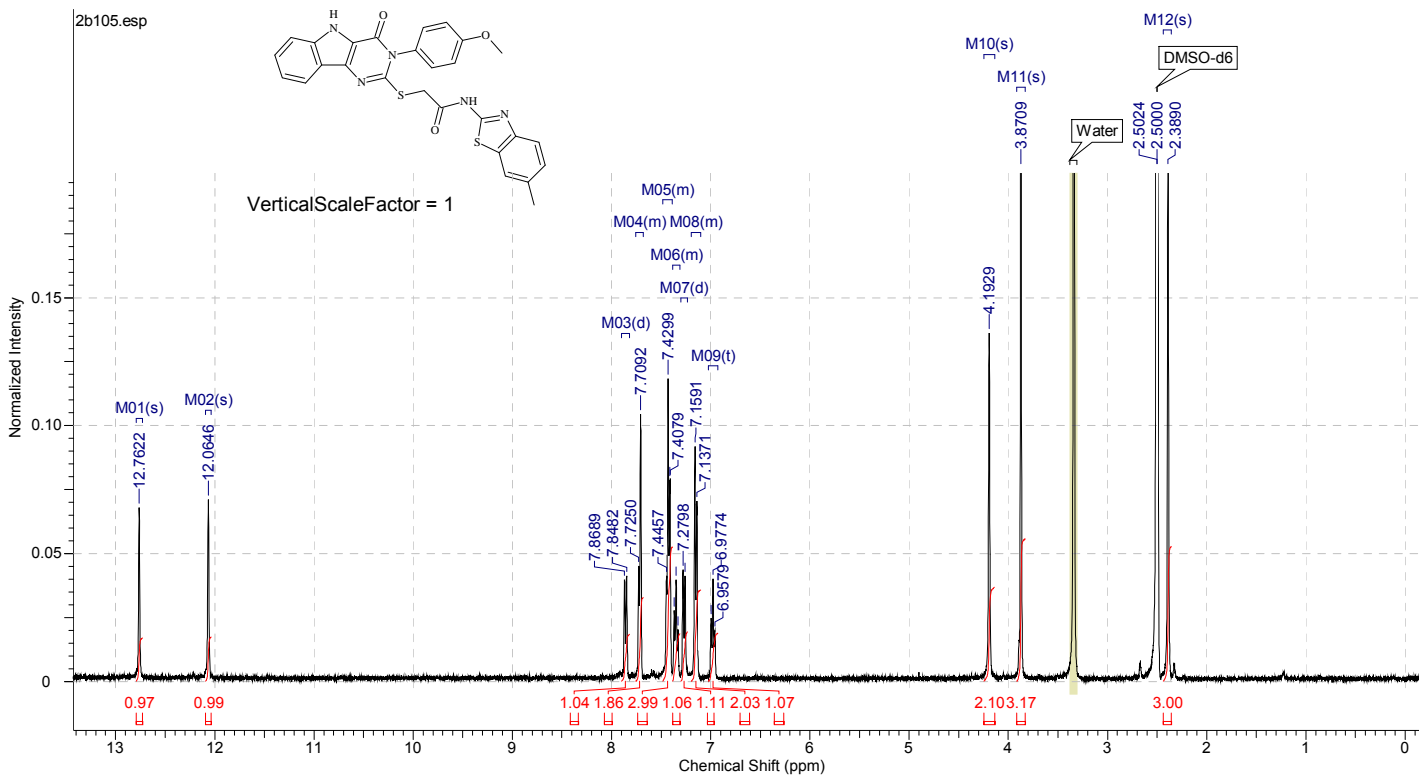

4/24/2017 3:04:03 PM

| Acquisition Time (sec) | 1.3005                                                                     | Comment              | Std carbon | Date                   | Apr 24 2017 | Date Stamp           | Apr 24 2017 |
|------------------------|----------------------------------------------------------------------------|----------------------|------------|------------------------|-------------|----------------------|-------------|
| File Name              | C:\Documents and Settings\Mycoahhh\My Documents\NMR\C13 fids\2b105.fid\fid |                      |            |                        |             | Frequency (MHz)      | 125.69      |
| Nucleus                | <sup>13</sup> C                                                            | Number of Transients | 128        | Original Points Count  | 39649       | Points Count         | 65536       |
| Pulse Sequence         | s2pul                                                                      | Receiver Gain        | 58.00      | Solvent                | DMSO-d6     | Spectrum Offset (Hz) | 13136.5117  |
| Spectrum Type          | STANDARD                                                                   | Sweep Width (Hz)     | 30487.80   | Temperature (degree C) | 30.000      |                      |             |

<sup>13</sup>C NMR (126 MHz, DMSO-d<sub>6</sub>) δ 167.8, 160.1, 157.2, 155.0, 152.8, 146.6, 138.8, 137.0, 132.9, 131.6, 130.7, 128.3, 127.4, 127.1, 121.3, 120.2, 120.2, 119.9, 119.2, 114.7, 112.7, 55.5, 36.3, 20.9

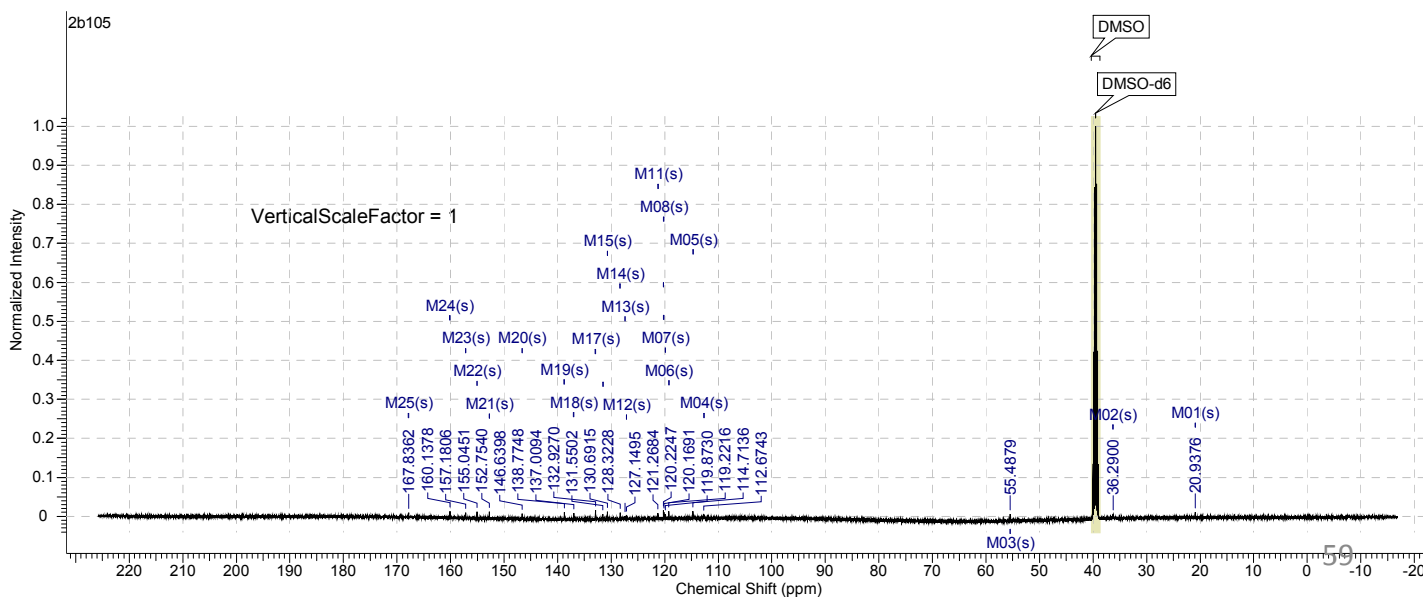

# LC-MS and HRMS

## 6{2,6}

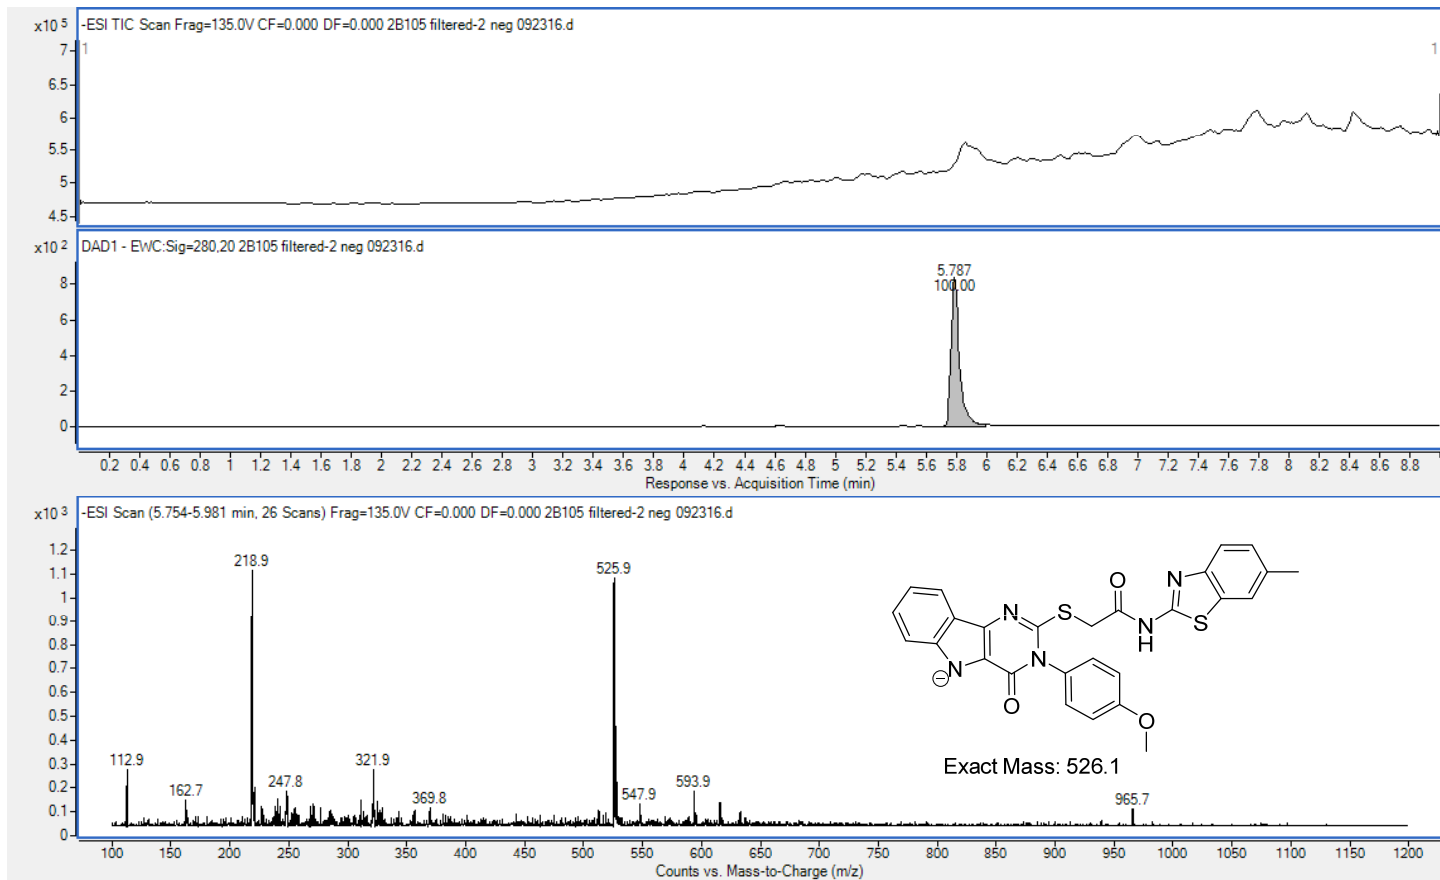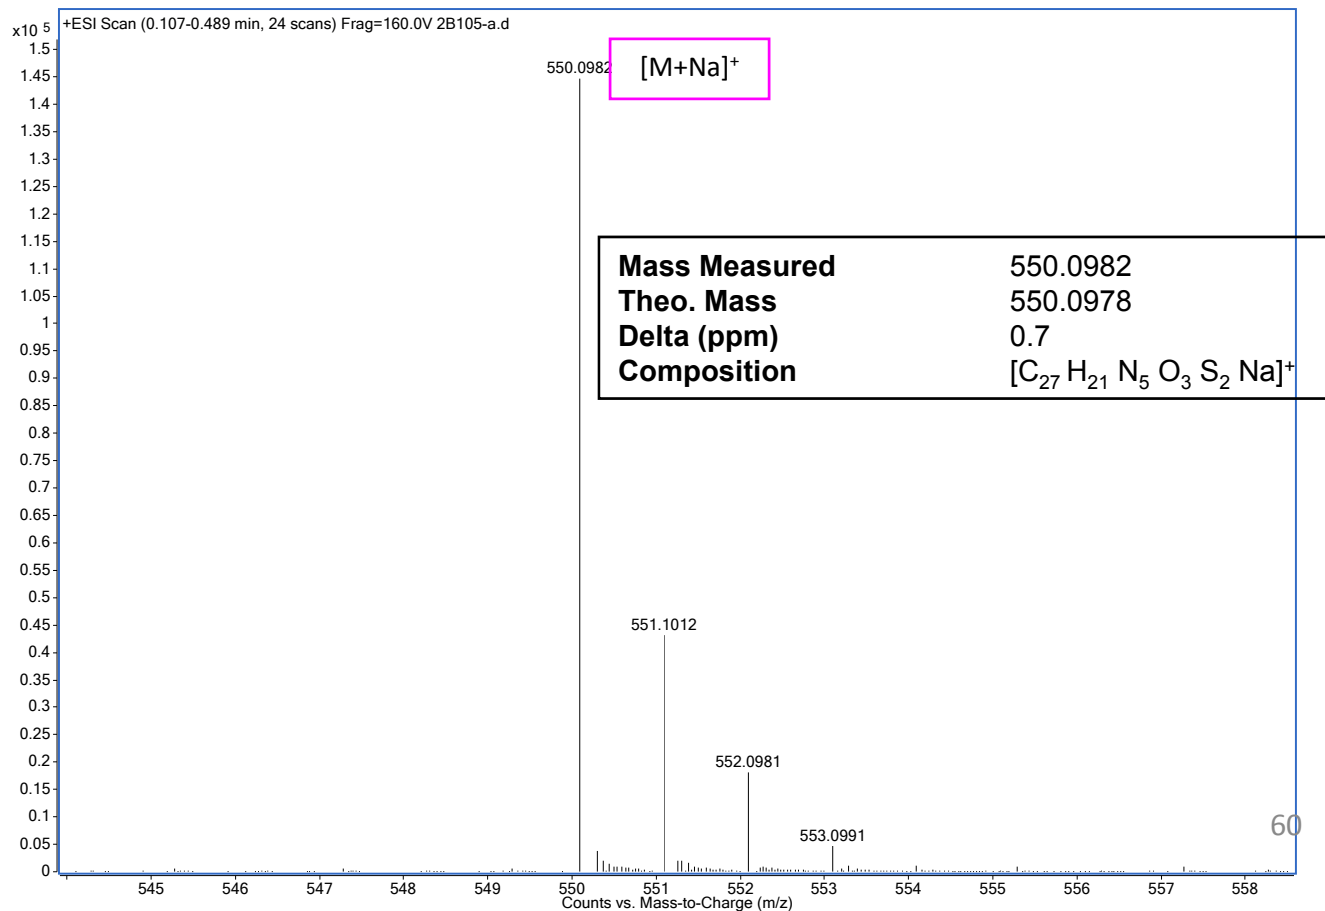

# <sup>1</sup>H NMR, LC-MS

## 6{3,6}

4/20/2017 12:40:11 PM

| Acquisition Time (sec) | 2.0097      | Comment        | STANDARD 1H OBSERVE                                                    |                      |         | Date                   | Dec 23 2016         |
|------------------------|-------------|----------------|------------------------------------------------------------------------|----------------------|---------|------------------------|---------------------|
| Date Stamp             | Dec 23 2016 | File Name      | C:\Documents and Settings\Mycoahhh\My Documents\NMR\mchan\2b94.fid\fid |                      |         |                        |                     |
| Frequency (MHz)        | 400.05      | Nucleus        | 1H                                                                     | Number of Transients | 16      | Original Points Count  | 16065               |
| Points Count           | 16384       | Pulse Sequence | s2pul                                                                  | Receiver Gain        | 20.00   | Solvent                | DMSO-d6             |
| Spectrum Offset (Hz)   | 1960.5895   | Spectrum Type  | STANDARD                                                               | Sweep Width (Hz)     | 7993.60 | Temperature (degree C) | AMBIENT TEMPERATURE |

<sup>1</sup>H NMR (400 MHz, DMSO-d<sub>6</sub>) δ 12.83 (s, 1H), 11.86 (s, 1H), 7.78 (d, *J* = 7.81 Hz, 1H), 7.67 - 7.76 (m, 2H), 7.40 (d, *J* = 7.81 Hz, 1H), 7.24 - 7.35 (m, 2H), 6.89 (t, *J* = 7.30 Hz, 1H), 4.57 - 4.74 (m, 1H), 4.32 (s, 2H), 2.38 (br. s., 3H), 1.66 (d, *J* = 6.34 Hz, 6H)

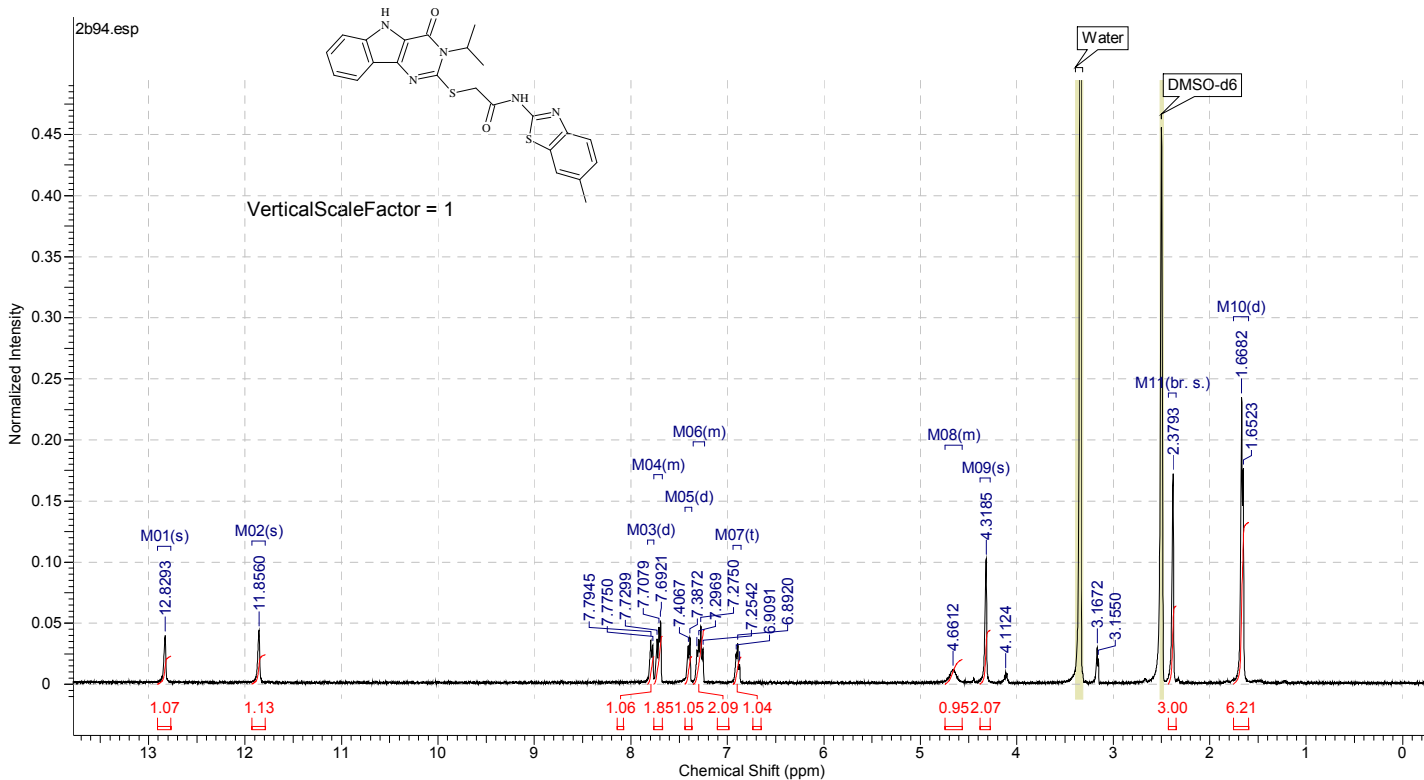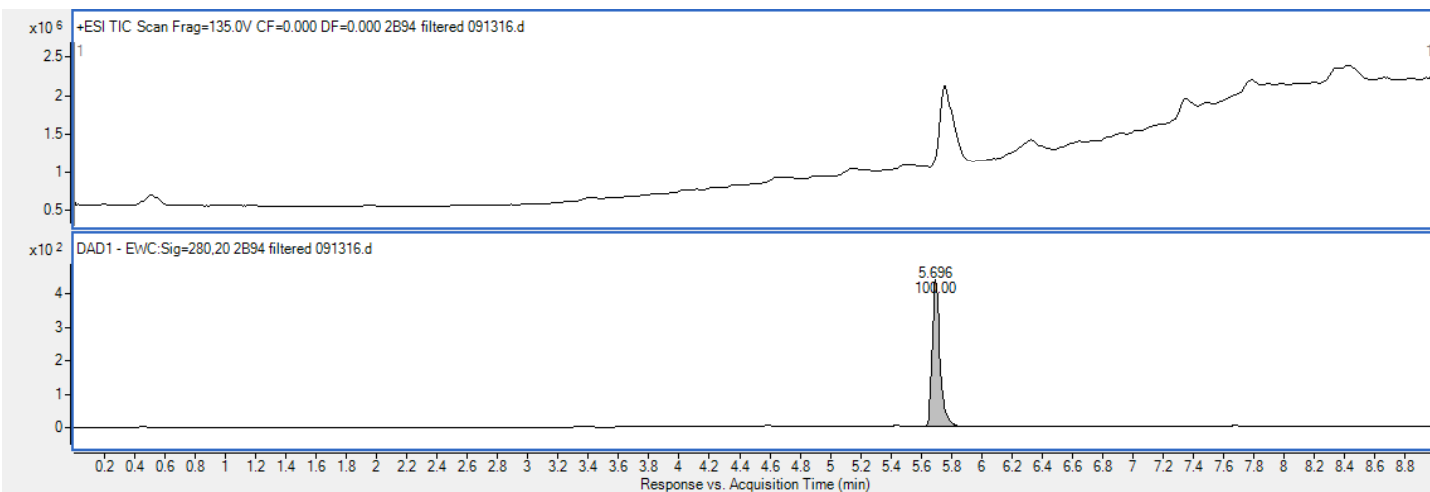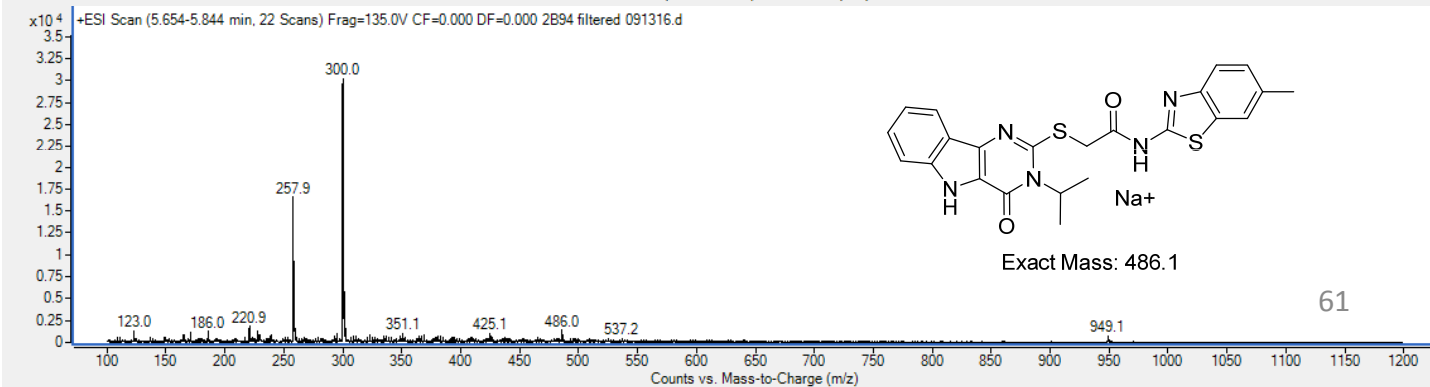

# <sup>1</sup>H, <sup>13</sup>C NMR

# 6{4,6}

4/20/2017 1:12:10 PM

|                        |             |                |                                                                         |                        |                     |
|------------------------|-------------|----------------|-------------------------------------------------------------------------|------------------------|---------------------|
| Acquisition Time (sec) | 2.0195      | Comment        | STANDARD 1H OBSERVE                                                     | Date                   | Dec 23 2016         |
| Date Stamp             | Dec 23 2016 | File Name      | C:\Documents and Settings\Mycoahhh\My Documents\NMR\michan\2b49.fid\fid |                        |                     |
| Frequency (MHz)        | 400.05      | Nucleus        | 1H                                                                      | Number of Transients   | 16                  |
| Points Count           | 16384       | Pulse Sequence | s2pul                                                                   | Receiver Gain          | 20.00               |
| Spectrum Offset (Hz)   | 1961.0773   | Spectrum Type  | STANDARD                                                                | Sweep Width (Hz)       | 7993.60             |
|                        |             |                |                                                                         | Original Points Count  | 16143               |
|                        |             |                |                                                                         | Solvent                | DMSO-d6             |
|                        |             |                |                                                                         | Temperature (degree C) | AMBIENT TEMPERATURE |

<sup>1</sup>H NMR (400 MHz, DMSO-d<sub>6</sub>) δ 12.81 (br. s., 1H), 11.96 (s, 1H), 7.81 (d, *J* = 8.29 Hz, 1H), 7.66 - 7.75 (m, 2H), 7.41 (d, *J* = 8.29 Hz, 1H), 7.32 (t, *J* = 7.80 Hz, 1H), 7.27 (d, *J* = 8.29 Hz, 1H), 6.93 (t, *J* = 7.32 Hz, 1H), 4.37 (s, 2H), 3.63 (s, 3H), 2.38 (s, 3H)

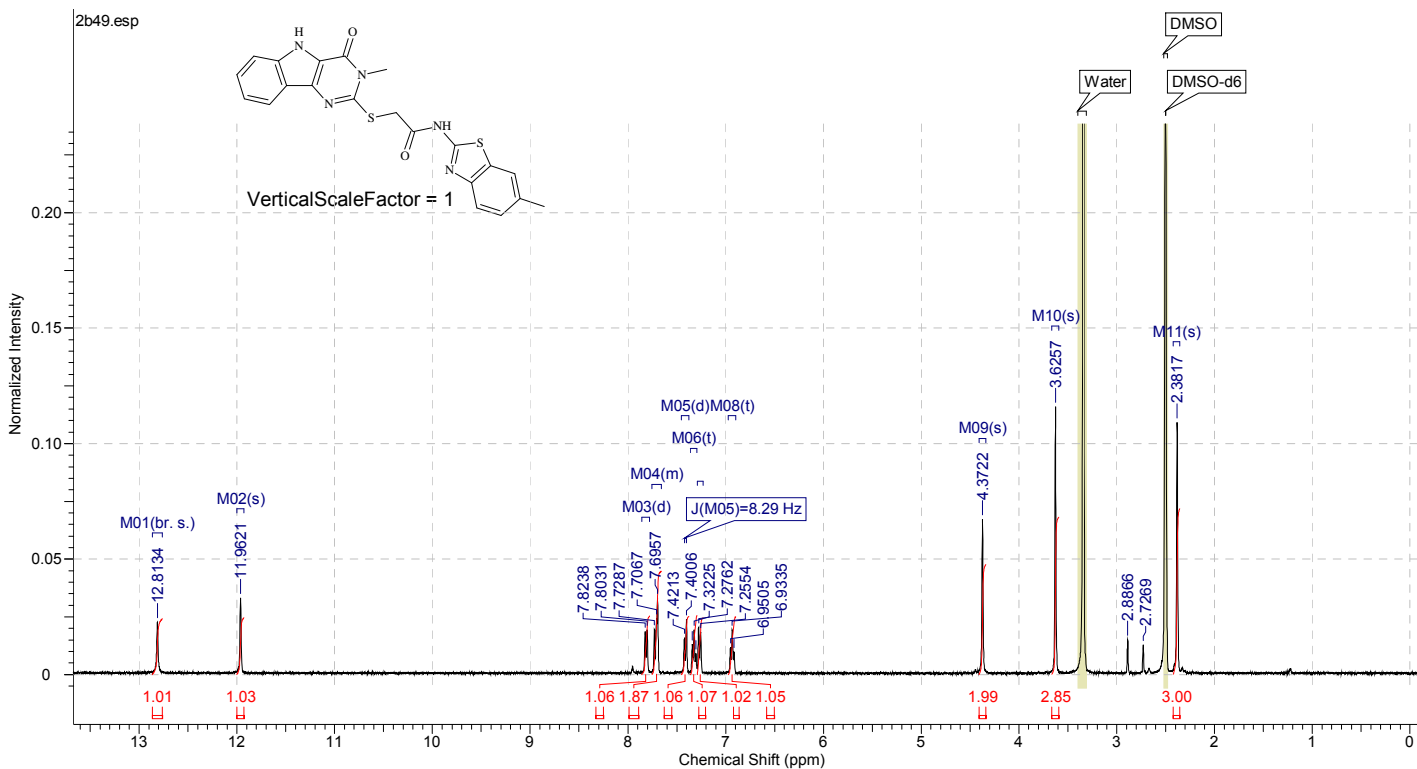

4/24/2017 2:49:06 PM

|                        |                                                                           |                      |            |                        |             |                      |             |
|------------------------|---------------------------------------------------------------------------|----------------------|------------|------------------------|-------------|----------------------|-------------|
| Acquisition Time (sec) | 1.3005                                                                    | Comment              | Std carbon | Date                   | Apr 24 2017 | Date Stamp           | Apr 24 2017 |
| File Name              | C:\Documents and Settings\Mycoahhh\My Documents\NMR\C13 fids\2b49.fid\fid |                      |            |                        |             | Frequency (MHz)      | 125.69      |
| Nucleus                | <sup>13</sup> C                                                           | Number of Transients | 128        | Original Points Count  | 39649       | Points Count         | 65536       |
| Pulse Sequence         | s2pul                                                                     | Receiver Gain        | 56.00      | Solvent                | DMSO-d6     | Spectrum Offset (Hz) | 13134.1855  |
| Spectrum Type          | STANDARD                                                                  | Sweep Width (Hz)     | 30487.80   | Temperature (degree C) | 30.000      |                      |             |

<sup>13</sup>C NMR (126 MHz, DMSO-d<sub>6</sub>) δ 167.7, 157.2, 154.6, 151.6, 146.6, 138.7, 136.7, 132.9, 131.5, 127.4, 127.4, 127.1, 121.3, 120.2, 120.1, 119.7, 118.7, 112.6, 35.9, 30.0, 20.9

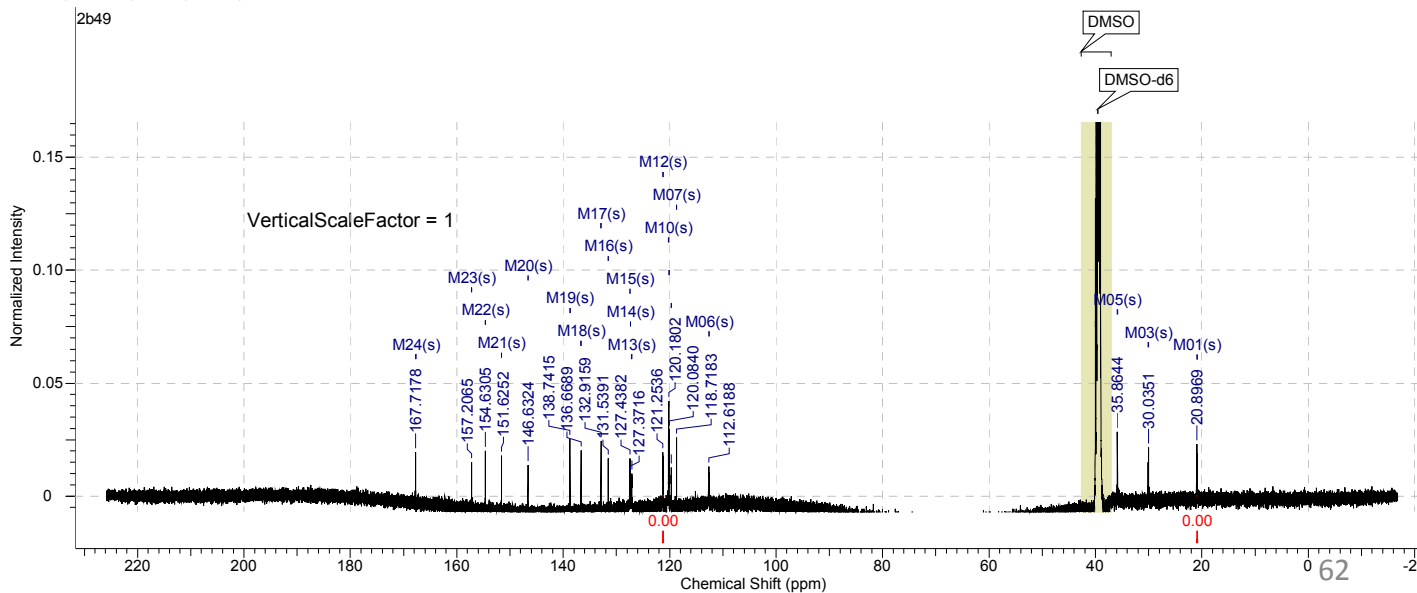

# LC-MS and HRMS

## 6{4,6}

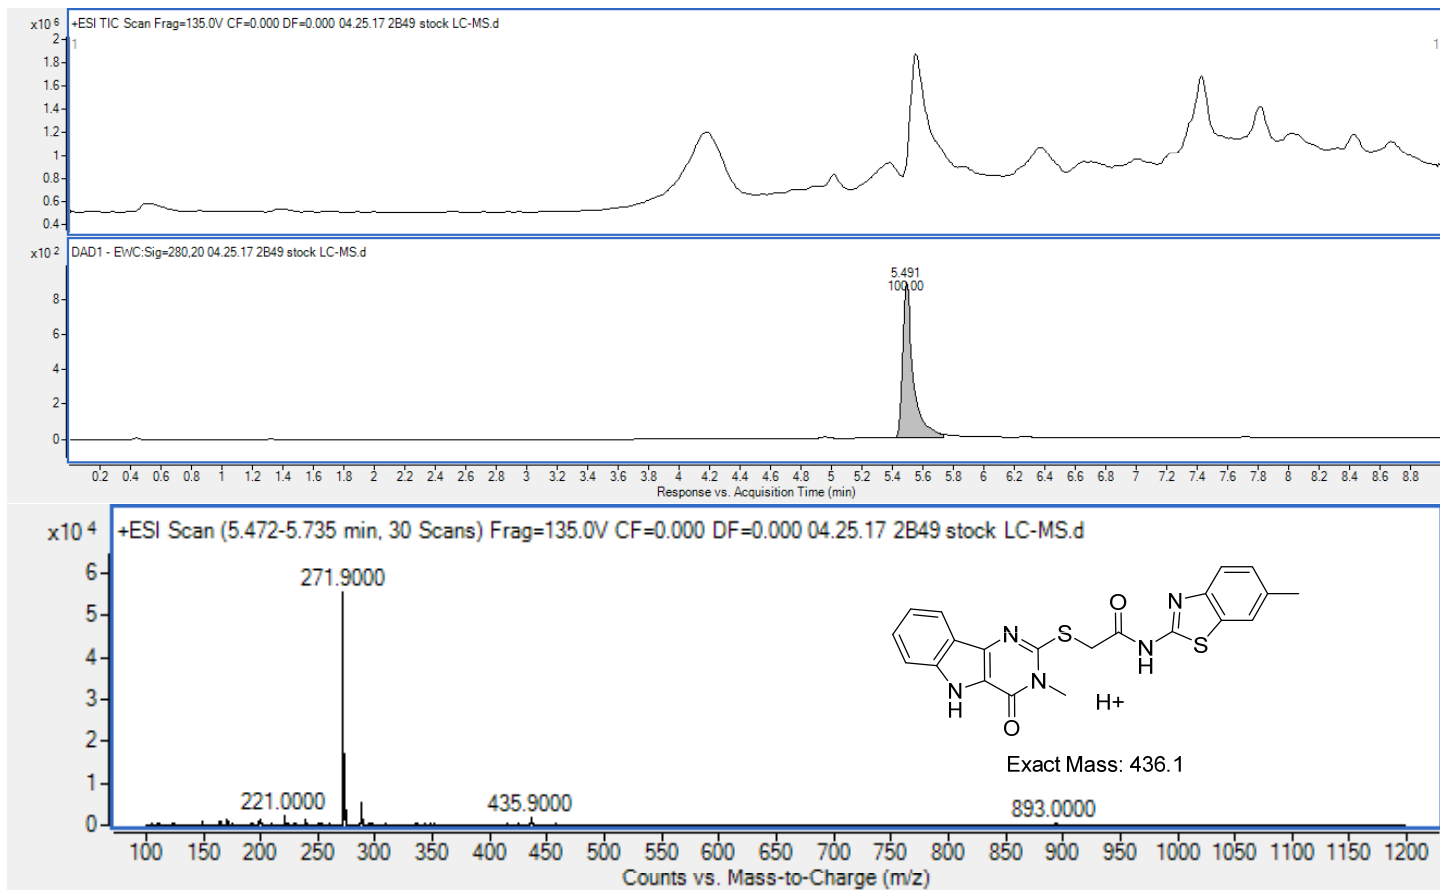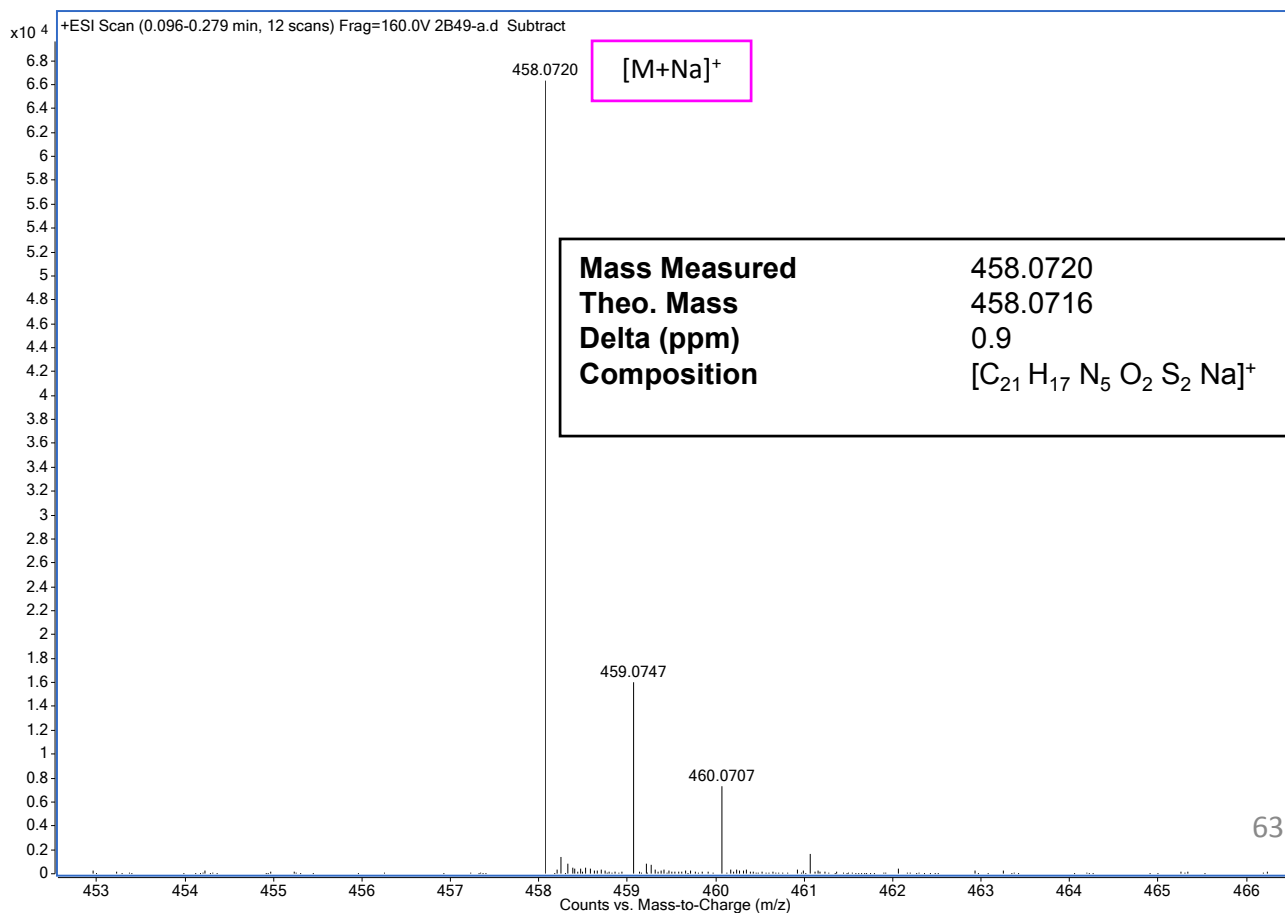

# <sup>1</sup>H, <sup>13</sup>C NMR

# 6{5,6}

3/29/2017 2:24:35 PM

|                        |             |                |                                                                         |                      |         |                        |                     |
|------------------------|-------------|----------------|-------------------------------------------------------------------------|----------------------|---------|------------------------|---------------------|
| Acquisition Time (sec) | 2.0276      | Comment        | STANDARD 1H OBSERVE                                                     |                      | Date    | Mar 29 2017            |                     |
| Date Stamp             | Mar 29 2017 | File Name      | C:\Documents and Settings\Mycoahhh\My Documents\NMR\mchan\2b115.fid\fid |                      |         |                        |                     |
| Frequency (MHz)        | 399.91      | Nucleus        | 1H                                                                      | Number of Transients | 200     | Original Points Count  | 16208               |
| Points Count           | 16384       | Pulse Sequence | s2pul                                                                   | Receiver Gain        | 24.00   | Solvent                | DMSO-d6             |
| Spectrum Offset (Hz)   | 2033.4424   | Spectrum Type  | STANDARD                                                                | Sweep Width (Hz)     | 7993.60 | Temperature (degree C) | AMBIENT TEMPERATURE |

<sup>1</sup>H NMR (400 MHz, DMSO-d<sub>6</sub>) δ 12.82 (s, 1H), 11.95 (s, 1H), 7.80 (d, J = 7.81 Hz, 1H), 7.69 (s, 1H), 7.72 (d, J = 8.29 Hz, 1H), 7.41 (d, J = 8.29 Hz, 1H), 7.26 (d, J = 8.29 Hz, 1H), 7.32 (t, J = 7.80 Hz, 1H), 6.93 (t, J = 7.56 Hz, 1H), 4.36 (s, 2H), 4.21 (q, J = 7.32 Hz, 2H), 2.38 (s, 3H), 1.35 (t, J = 7.07 Hz, 3H)

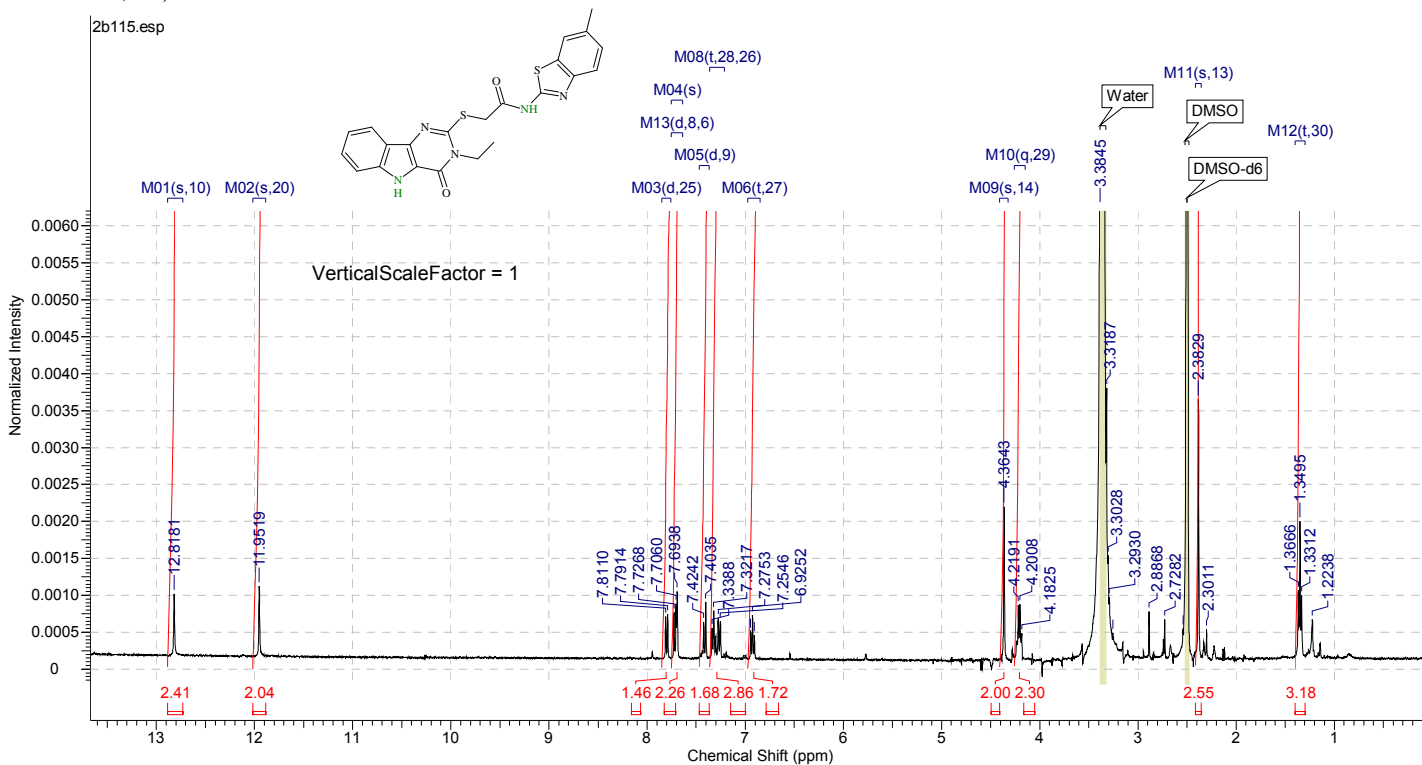

4/25/2017 10:40:55 AM

|                        |                                                                            |                      |            |                        |             |                      |             |
|------------------------|----------------------------------------------------------------------------|----------------------|------------|------------------------|-------------|----------------------|-------------|
| Acquisition Time (sec) | 1.3005                                                                     | Comment              | Std carbon | Date                   | Apr 24 2017 | Date Stamp           | Apr 24 2017 |
| File Name              | C:\Documents and Settings\Mycoahhh\My Documents\NMR\C13 fids\2b115.fid\fid |                      |            | Frequency (MHz)        | 125.69      |                      |             |
| Nucleus                | <sup>13</sup> C                                                            | Number of Transients | 32         | Original Points Count  | 39649       | Points Count         | 65536       |
| Pulse Sequence         | s2pul                                                                      | Receiver Gain        | 58.00      | Solvent                | tfa         | Spectrum Offset (Hz) | 13196.4531  |
| Spectrum Type          | STANDARD                                                                   | Sweep Width (Hz)     | 30487.80   | Temperature (degree C) | 30.000      |                      |             |

<sup>13</sup>C NMR (126 MHz, tfa) δ 170.7, 155.9, 140.6, 140.1, 132.5, 131.8, 131.7, 126.0, 123.7, 121.9, 119.2, 118.6, 115.7, 114.9, 114.2, 113.5, 113.4, 112.6, 110.4, 44.6, 19.6, 11.5

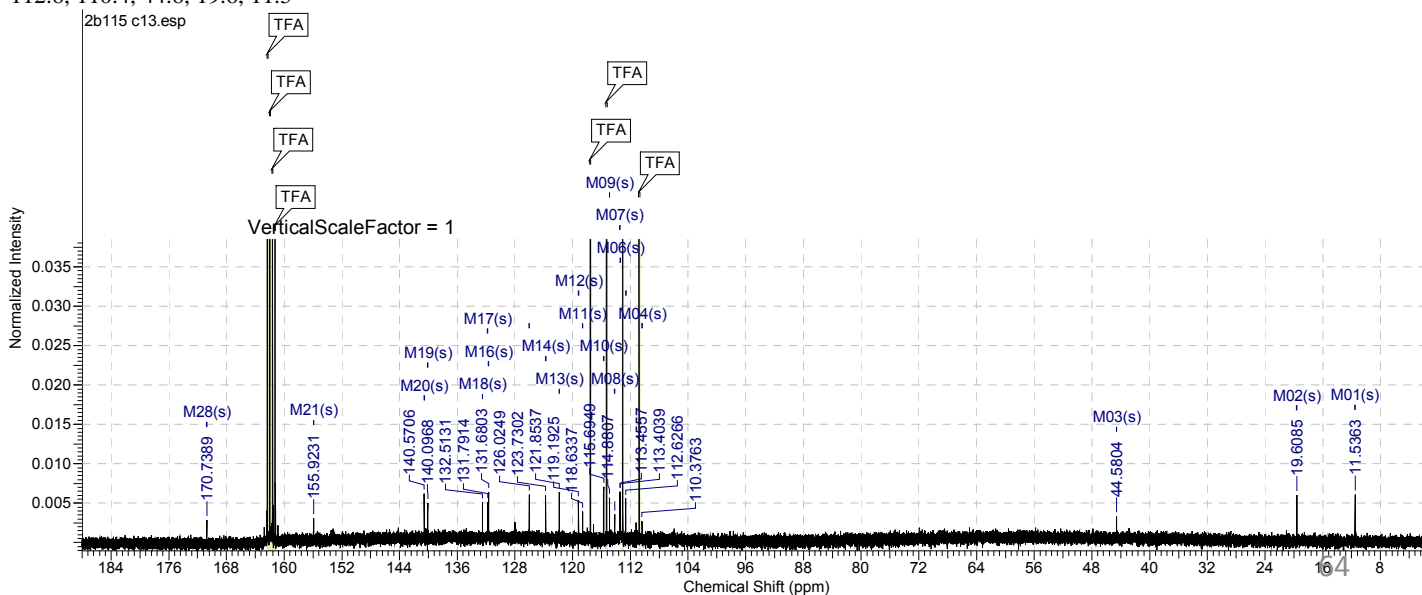



# LC-MS and HRMS

## 6{5,6}

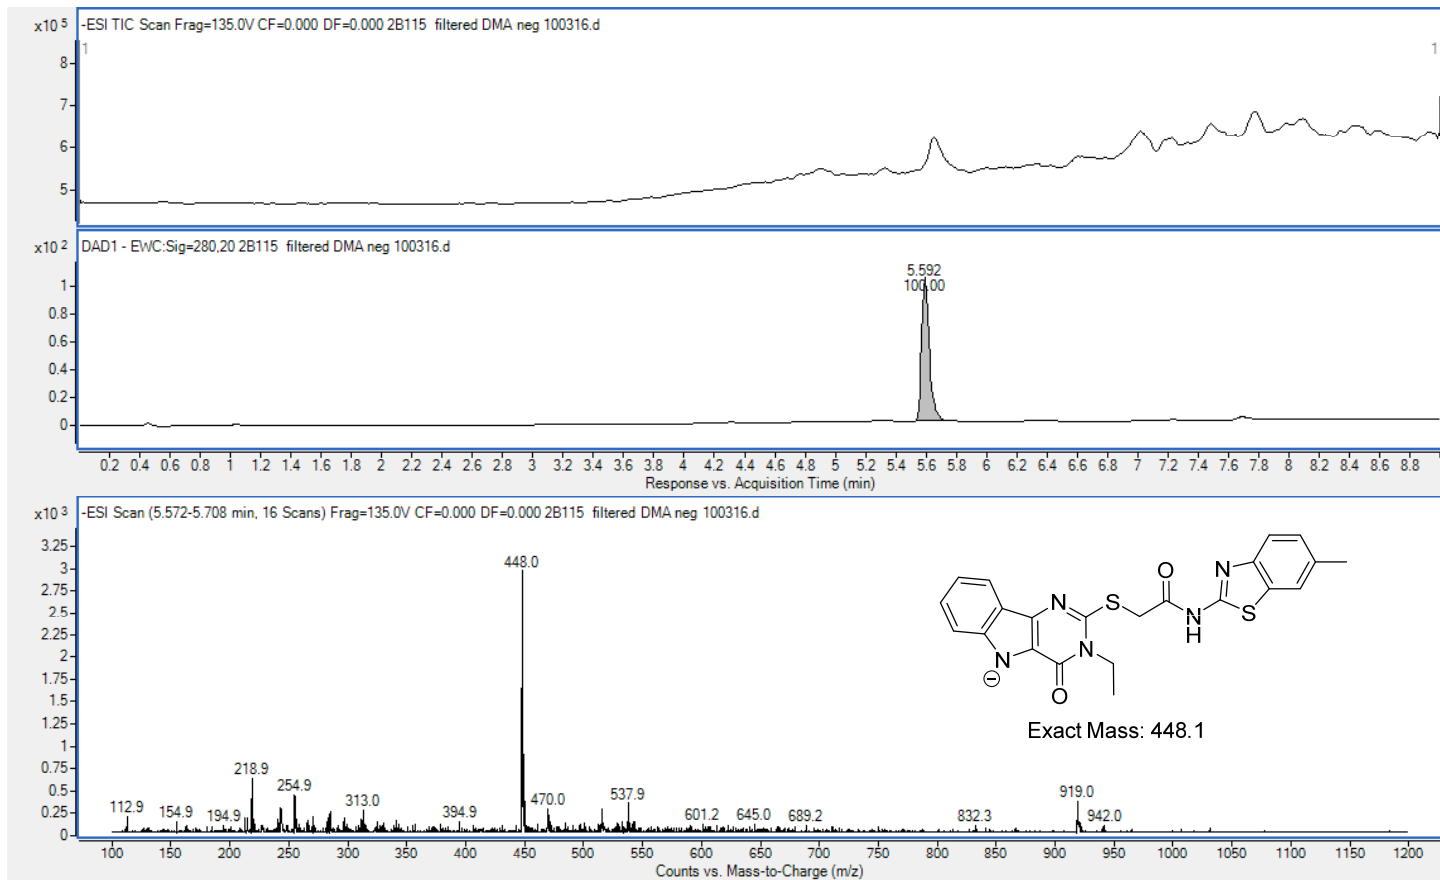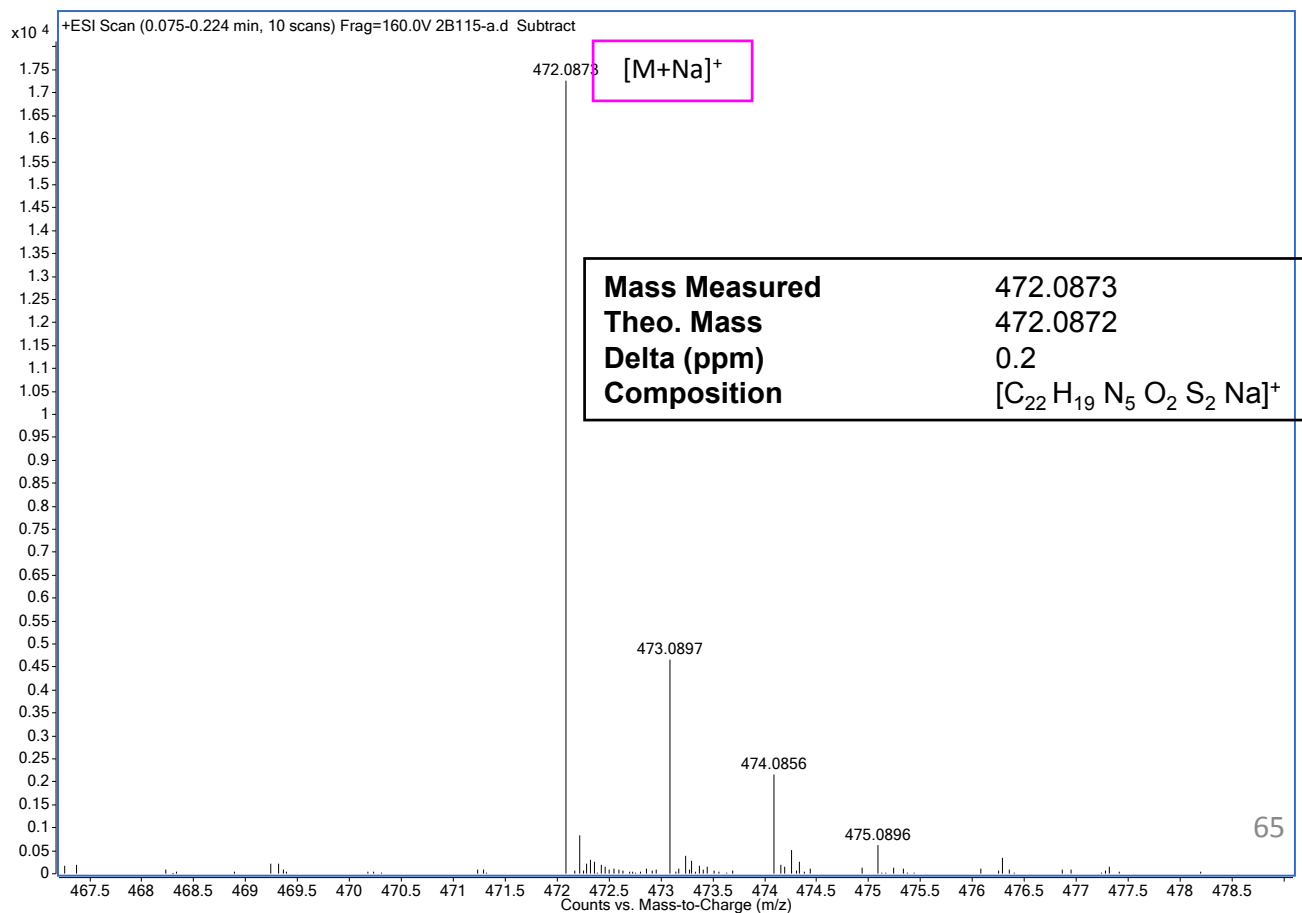

# <sup>1</sup>H, <sup>13</sup>C NMR

# 6{6,6}

4/20/2017 1:20:53 PM

|                        |            |                |                                                                         |                      |         |                        |                     |
|------------------------|------------|----------------|-------------------------------------------------------------------------|----------------------|---------|------------------------|---------------------|
| Acquisition Time (sec) | 2.0211     | Comment        | STANDARD 1H OBSERVE                                                     |                      | Date    | Jan 5 2017             |                     |
| Date Stamp             | Jan 5 2017 | File Name      | C:\Documents and Settings\Mycoahhh\My Documents\NMR\mchan\2B130.fid\fid |                      |         |                        |                     |
| Frequency (MHz)        | 400.05     | Nucleus        | 1H                                                                      | Number of Transients | 16      | Original Points Count  | 16156               |
| Points Count           | 16384      | Pulse Sequence | s2pul                                                                   | Receiver Gain        | 20.00   | Solvent                | DMSO-d6             |
| Spectrum Offset (Hz)   | 1964.4928  | Spectrum Type  | STANDARD                                                                | Sweep Width (Hz)     | 7993.60 | Temperature (degree C) | AMBIENT TEMPERATURE |

<sup>1</sup>H NMR (400 MHz, DMSO-d<sub>6</sub>) δ 12.83 (s, 1H), 11.96 (s, 1H), 7.81 (d, J = 7.81 Hz, 1H), 7.59 - 7.74 (m, 2H), 7.37 - 7.47 (m, 1H), 7.32 (t, J = 7.80 Hz, 1H), 7.27 (d, J = 8.29 Hz, 1H), 6.93 (t, J = 7.56 Hz, 1H), 4.36 (br. s., 2H), 4.11 (t, J = 7.80 Hz, 2H), 2.38 (br. s., 3H), 1.79 (sxt, J = 7.30 Hz, 2H), 0.99 (t, J = 7.30 Hz, 3H)

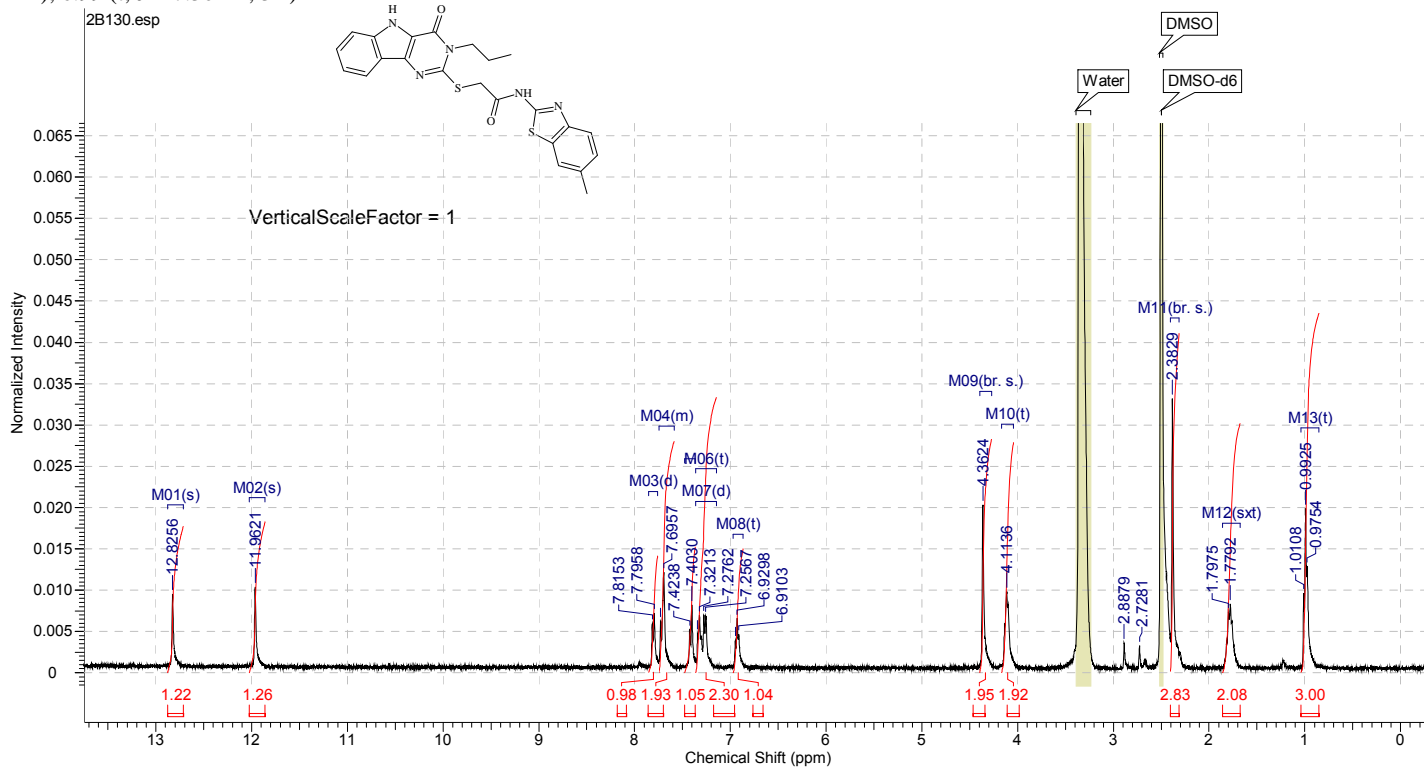

4/21/2017 11:09:16 AM

|                        |                                                                            |                |                 |                      |            |                        |            |
|------------------------|----------------------------------------------------------------------------|----------------|-----------------|----------------------|------------|------------------------|------------|
| Acquisition Time (sec) | 1.3005                                                                     | Comment        | Std carbon      | Date                 | Apr 6 2017 | Date Stamp             | Apr 6 2017 |
| File Name              | C:\Documents and Settings\Mycoahhh\My Documents\NMR\C13 fids\2b130.fid\fid | Nucleus        | <sup>13</sup> C | Number of Transients | 32         | Original Points Count  | 39649      |
| Frequency (MHz)        | 125.69                                                                     | Pulse Sequence | s2pul           | Receiver Gain        | 30.00      | Solvent                | DMSO-d6    |
| Points Count           | 65536                                                                      | Spectrum Type  | STANDARD        | Sweep Width (Hz)     | 30487.80   | Temperature (degree C) | 35.000     |
| Spectrum Offset (Hz)   | 13137.9072                                                                 |                |                 |                      |            |                        |            |

<sup>13</sup>C NMR (126 MHz, DMSO-d<sub>6</sub>) δ 167.8, 157.2, 154.5, 151.0, 146.6, 138.8, 136.7, 132.9, 131.5, 127.4, 127.2, 121.3, 120.2, 120.1, 119.8, 118.9, 112.6, 45.5, 35.9, 21.3, 21.0, 11.1

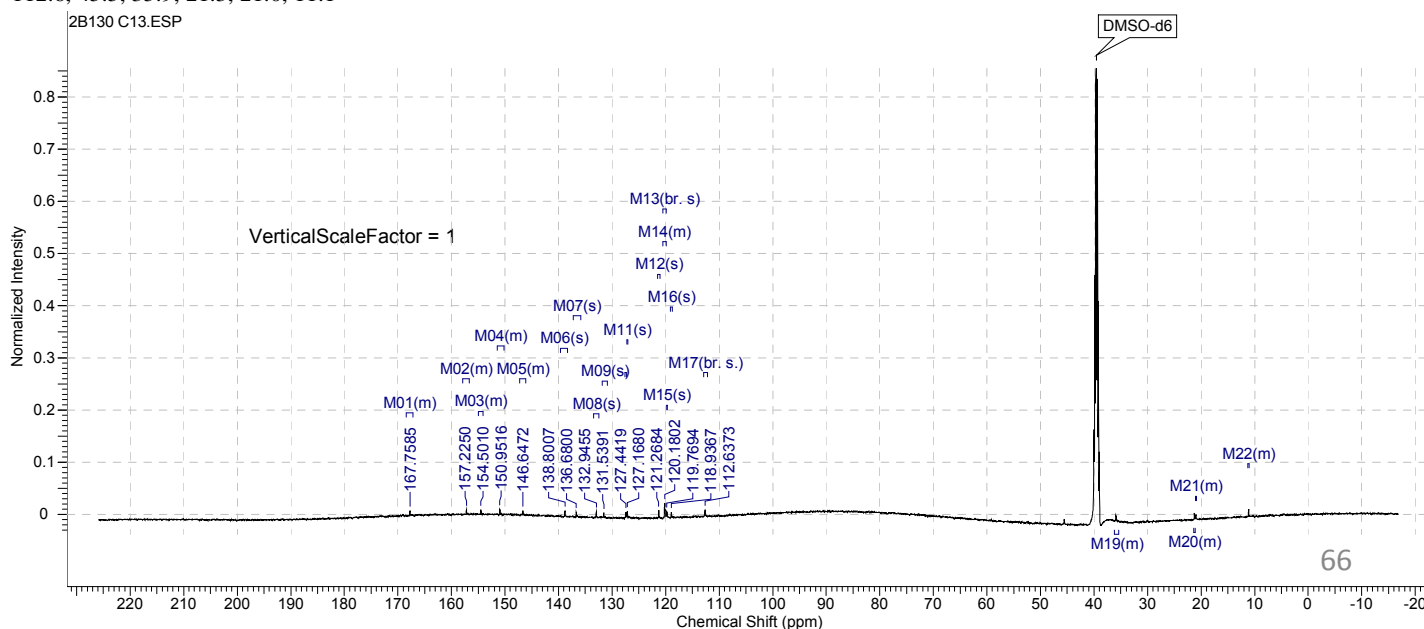

66

# LC-MS and HRMS

## 6{6,6}

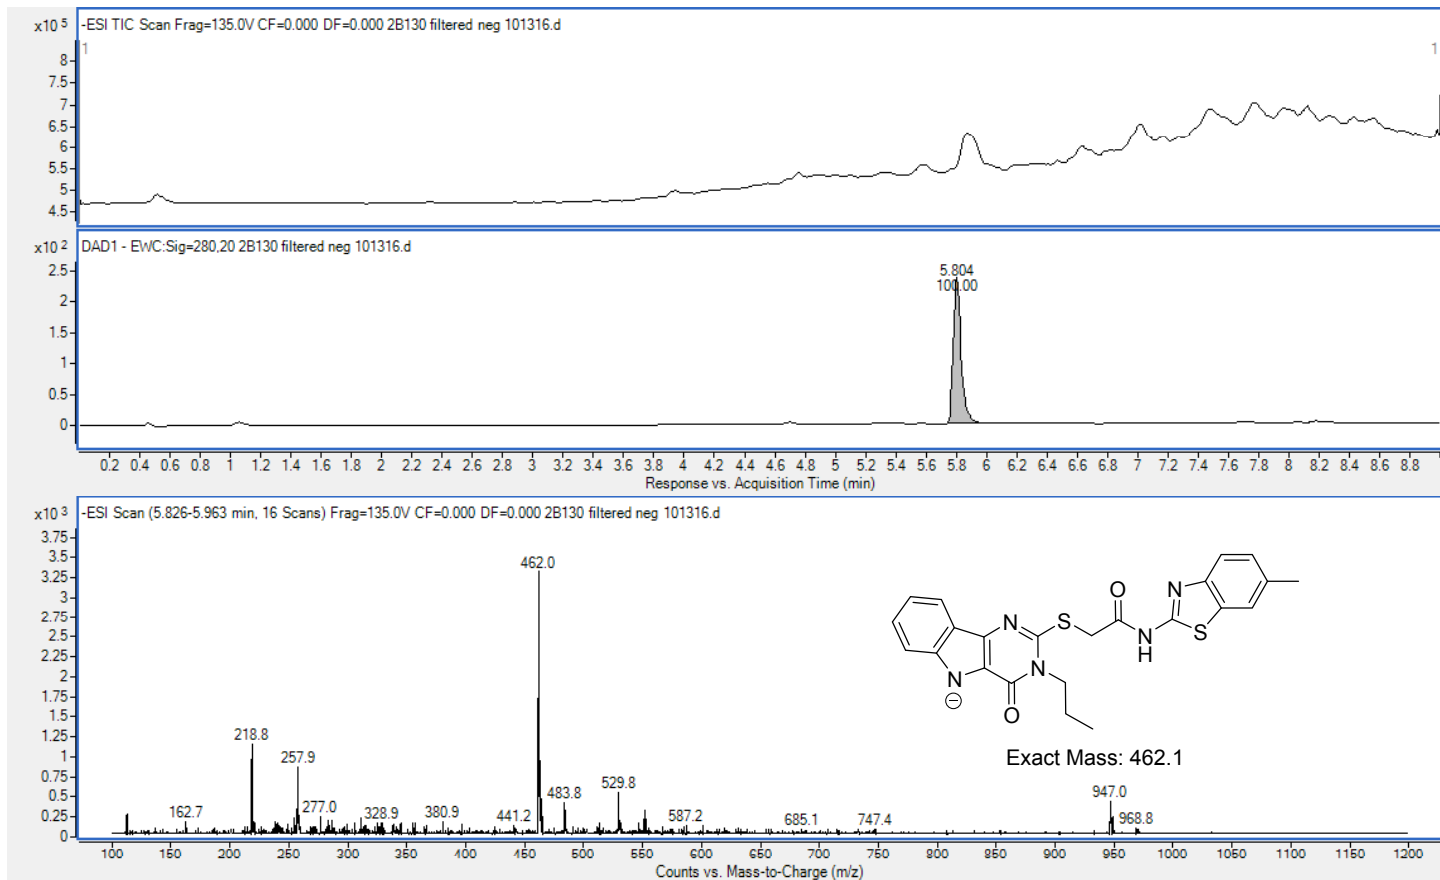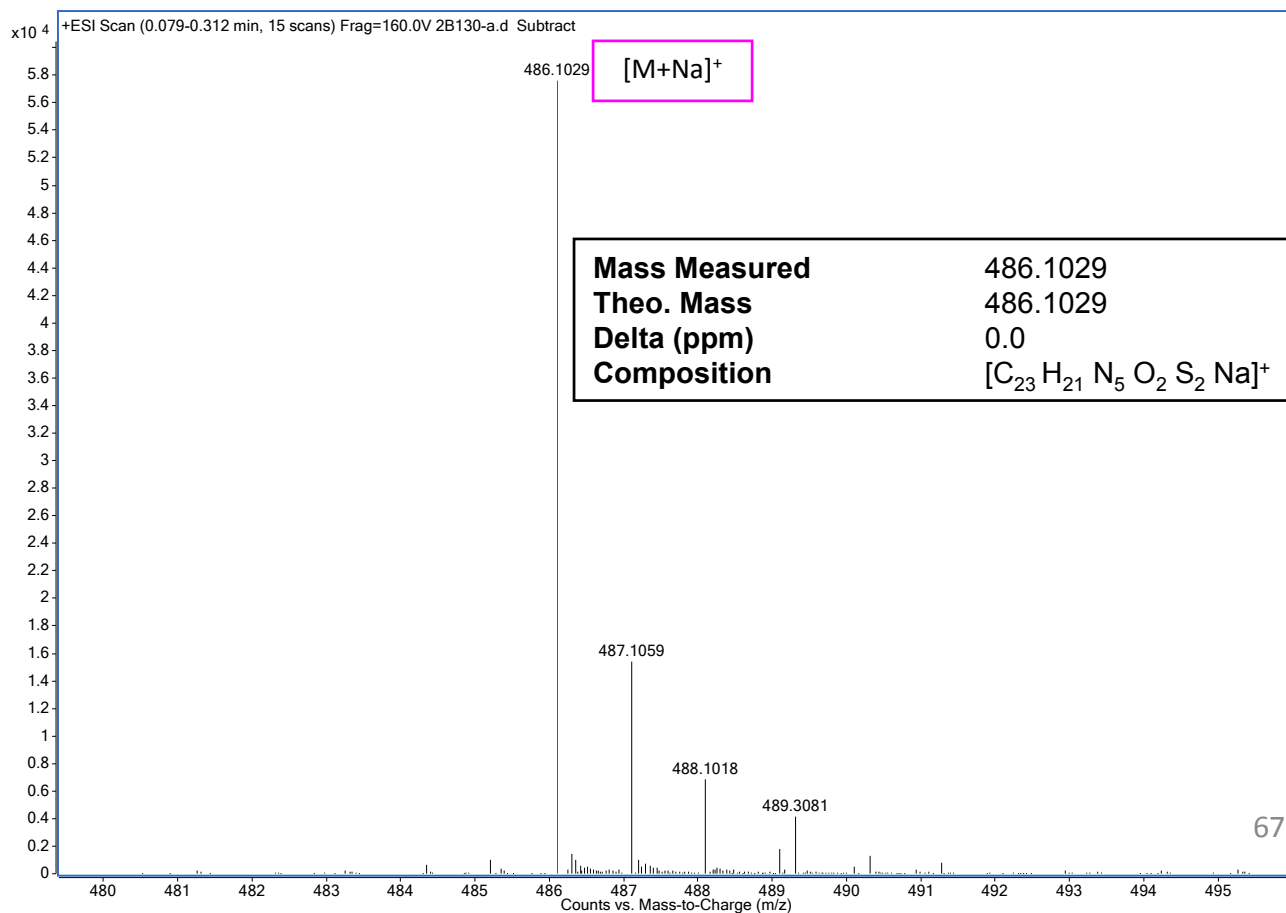

# <sup>1</sup>H, <sup>13</sup>C NMR

# 6{7,6}

4/20/2017 1:27:13 PM

|                        |             |                |                                                                          |                      |         |                        |                     |
|------------------------|-------------|----------------|--------------------------------------------------------------------------|----------------------|---------|------------------------|---------------------|
| Acquisition Time (sec) | 2.0130      | Comment        | STANDARD 1H OBSERVE                                                      |                      | Date    | Dec 23 2016            |                     |
| Date Stamp             | Dec 23 2016 | File Name      | C:\Documents and Settings\Mycoahhh\My Documents\NMR\michan\2B109.fid\fid |                      |         |                        |                     |
| Frequency (MHz)        | 400.05      | Nucleus        | 1H                                                                       | Number of Transients | 32      | Original Points Count  | 16091               |
| Points Count           | 16384       | Pulse Sequence | s2pul                                                                    | Receiver Gain        | 20.00   | Solvent                | DMSO-d6             |
| Spectrum Offset (Hz)   | 1960.5895   | Spectrum Type  | STANDARD                                                                 | Sweep Width (Hz)     | 7993.60 | Temperature (degree C) | AMBIENT TEMPERATURE |

<sup>1</sup>H NMR (400 MHz, DMSO-d<sub>6</sub>) δ 12.82 (s, 1H), 11.95 (s, 1H), 7.80 (d, J = 7.81 Hz, 1H), 7.72 (d, J = 8.29 Hz, 1H), 7.70 (s, 1H), 7.41 (d, J = 7.81 Hz, 1H), 7.32 (t, J = 7.40 Hz, 1H), 7.26 (d, J = 8.29 Hz, 1H), 6.93 (t, J = 7.56 Hz, 1H), 4.36 (s, 2H), 4.15 (t, J = 7.56 Hz, 2H), 2.38 (s, 3H), 1.75 (quin, J = 7.30 Hz, 2H), 1.43 (sxt, J = 7.40 Hz, 2H), 0.98 (t, J = 7.32 Hz, 3H)

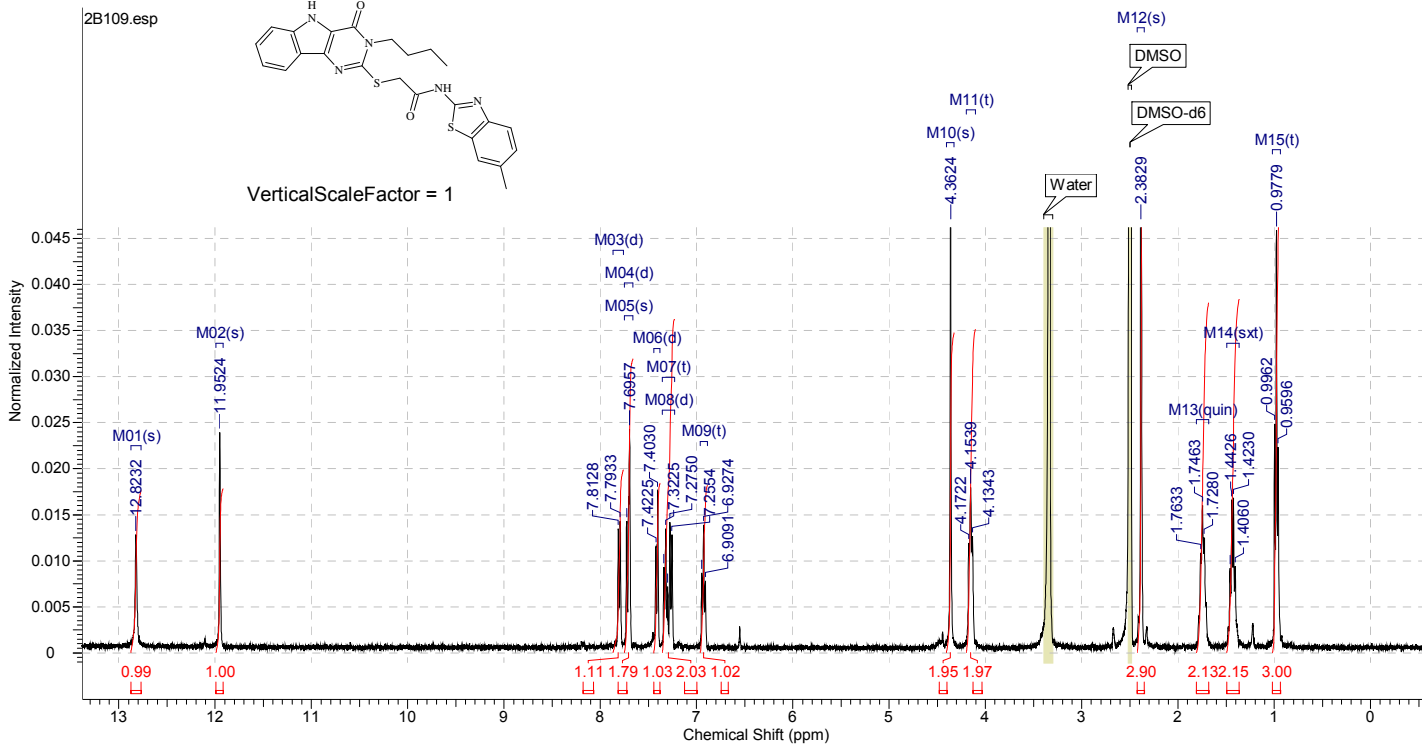

4/25/2017 10:08:42 AM

|                        |                                                                            |                      |            |                        |            |                      |            |
|------------------------|----------------------------------------------------------------------------|----------------------|------------|------------------------|------------|----------------------|------------|
| Acquisition Time (sec) | 1.3005                                                                     | Comment              | Std carbon | Date                   | Apr 6 2017 | Date Stamp           | Apr 6 2017 |
| File Name              | C:\Documents and Settings\Mycoahhh\My Documents\NMR\C13 fids\2b109.fid\fid |                      |            | Frequency (MHz)        | 125.69     |                      |            |
| Nucleus                | 13C                                                                        | Number of Transients | 32         | Original Points Count  | 39649      | Points Count         | 65536      |
| Pulse Sequence         | s2pul                                                                      | Receiver Gain        | 30.00      | Solvent                | DMSO-d6    | Spectrum Offset (Hz) | 13136.9775 |
| Spectrum Type          | STANDARD                                                                   | Sweep Width (Hz)     | 30487.80   | Temperature (degree C) | 35.000     |                      |            |

<sup>13</sup>C NMR (126 MHz, DMSO-d<sub>6</sub>) δ 167.8, 157.2, 154.5, 150.9, 146.6, 138.8, 136.7, 132.9, 131.5, 127.4, 127.2, 121.3, 120.2, 120.1, 119.8, 118.9, 112.6, 43.9, 35.9, 29.9, 20.9, 19.7, 13.6

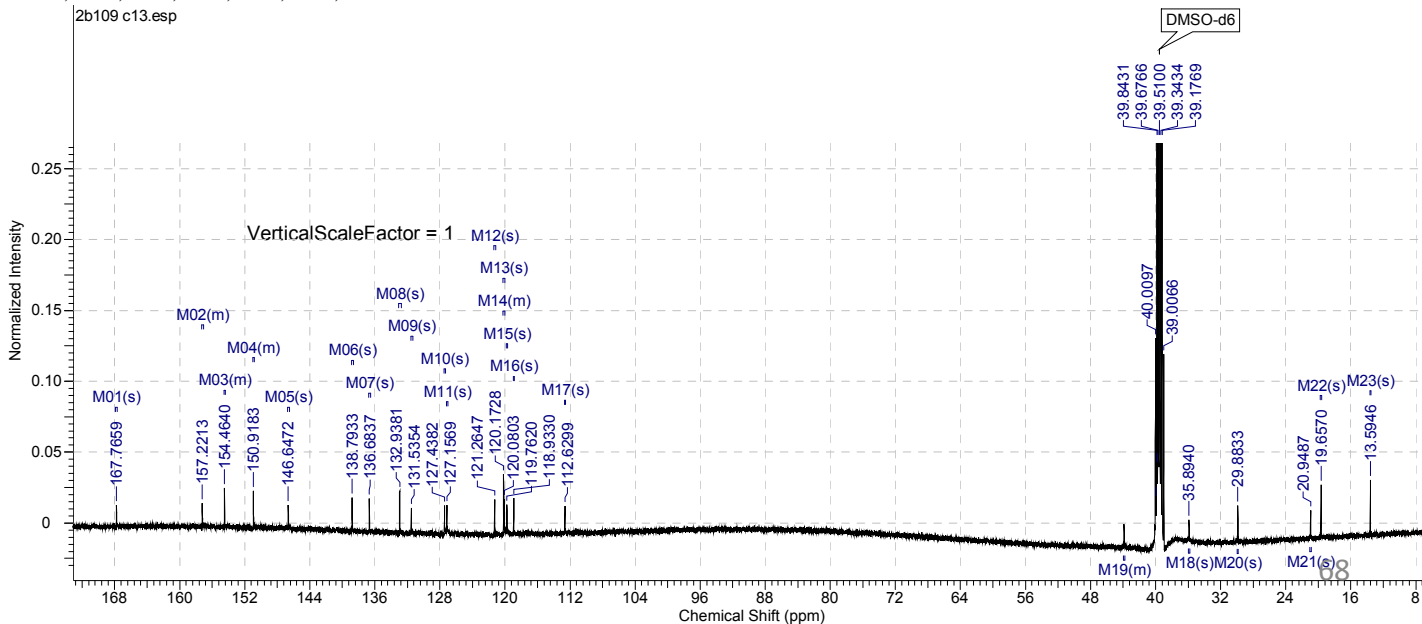

# LC-MS and HRMS

## 6{7,6}

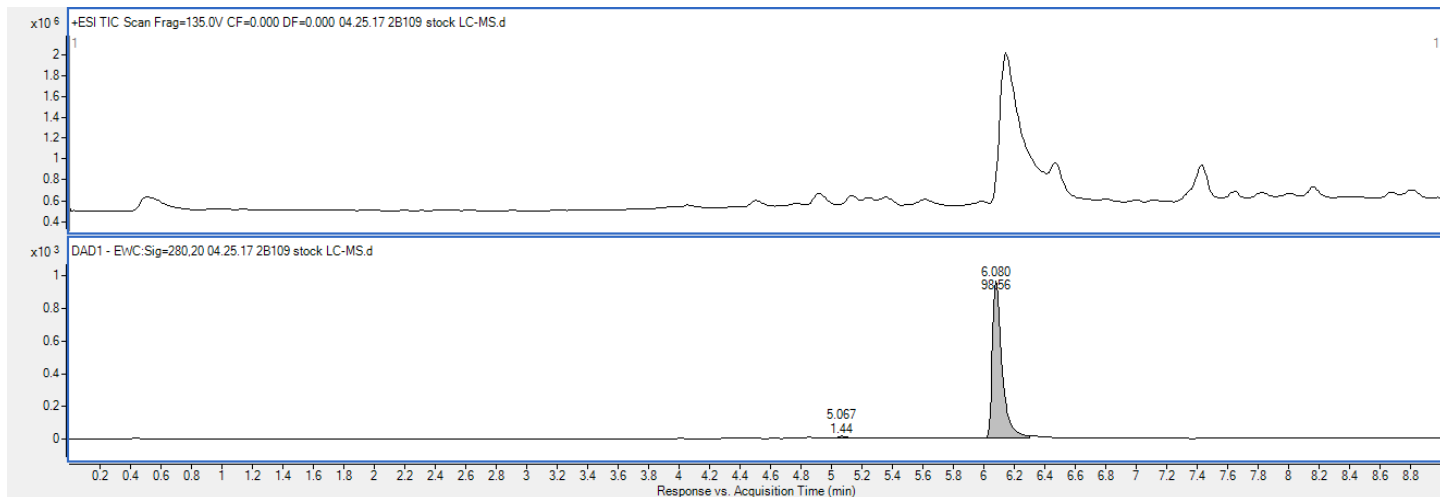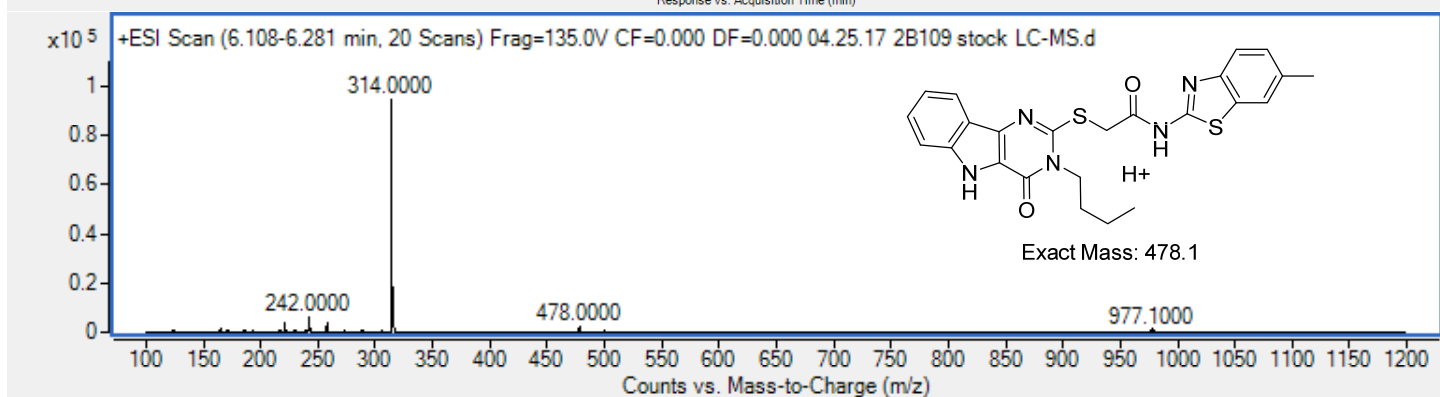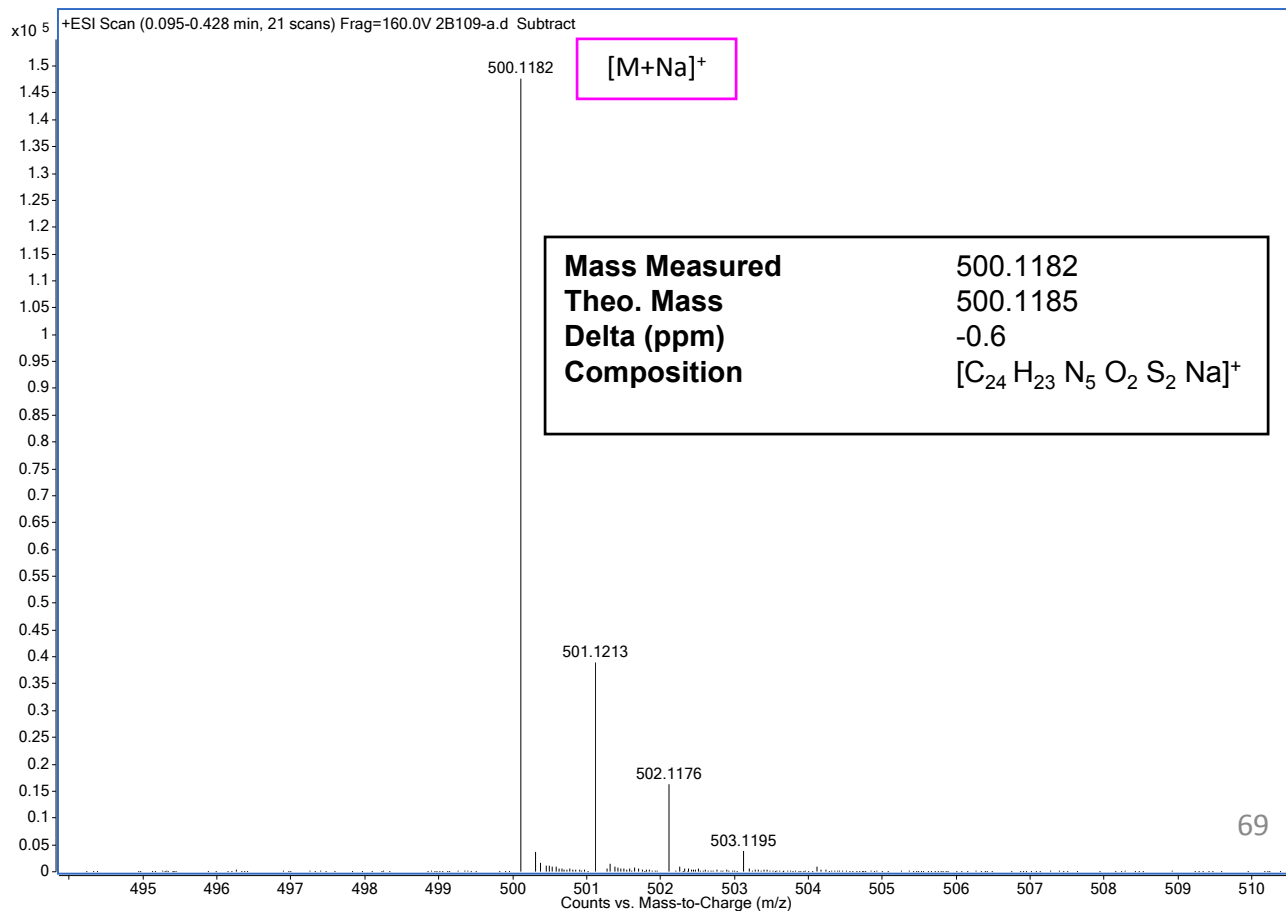

# <sup>1</sup>H NMR, LC-MS

# 9a

4/21/2017 10:17:08 AM

| Acquisition Time (sec) | 2.0032      | Comment        | STANDARD 1H OBSERVE                                                      | Date                   | Mar 24 2017         |
|------------------------|-------------|----------------|--------------------------------------------------------------------------|------------------------|---------------------|
| Date Stamp             | Mar 24 2017 | File Name      | C:\Documents and Settings\Mycoahhh\My Documents\NMR\michan\1y241.fid\fid |                        |                     |
| Frequency (MHz)        | 399.91      | Nucleus        | 1H                                                                       | Number of Transients   | 16                  |
| Points Count           | 16384       | Pulse Sequence | s2pul                                                                    | Receiver Gain          | 30.00               |
| Spectrum Offset (Hz)   | 2030.4821   | Spectrum Type  | STANDARD                                                                 | Sweep Width (Hz)       | 7993.60             |
|                        |             |                |                                                                          | Original Points Count  | 16013               |
|                        |             |                |                                                                          | Solvent                | DMSO-d6             |
|                        |             |                |                                                                          | Temperature (degree C) | AMBIENT TEMPERATURE |

<sup>1</sup>H NMR (400 MHz, DMSO-d<sub>6</sub>) δ 12.90 (s, 1H), 11.95 (s, 1H), 7.91 (d, *J* = 7.81 Hz, 1H), 7.80 (d, *J* = 7.80 Hz, 1H), 7.84 (d, *J* = 7.80 Hz, 1H), 7.42 (d, *J* = 8.29 Hz, 1H), 7.46 (t, *J* = 7.32 Hz, 1H), 7.32 (t, *J* = 7.30 Hz, 1H), 7.29 (t, *J* = 7.80 Hz, 1H), 6.92 (t, *J* = 7.56 Hz, 1H), 4.38 (s, 2H), 4.08 - 4.25 (m, 2H), 1.77 (quin, *J* = 7.30 Hz, 2H), 1.29 - 1.50 (m, 4H), 0.92 (t, *J* = 7.30 Hz, 3H)

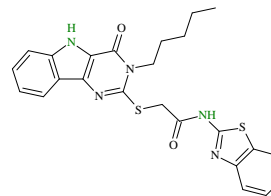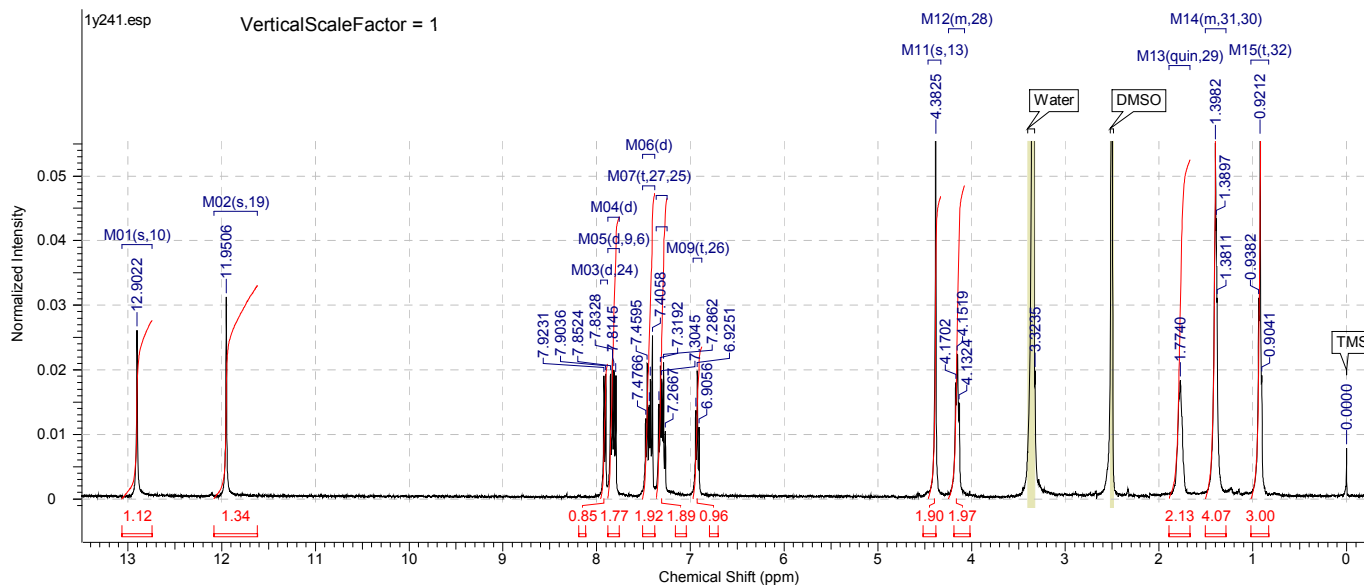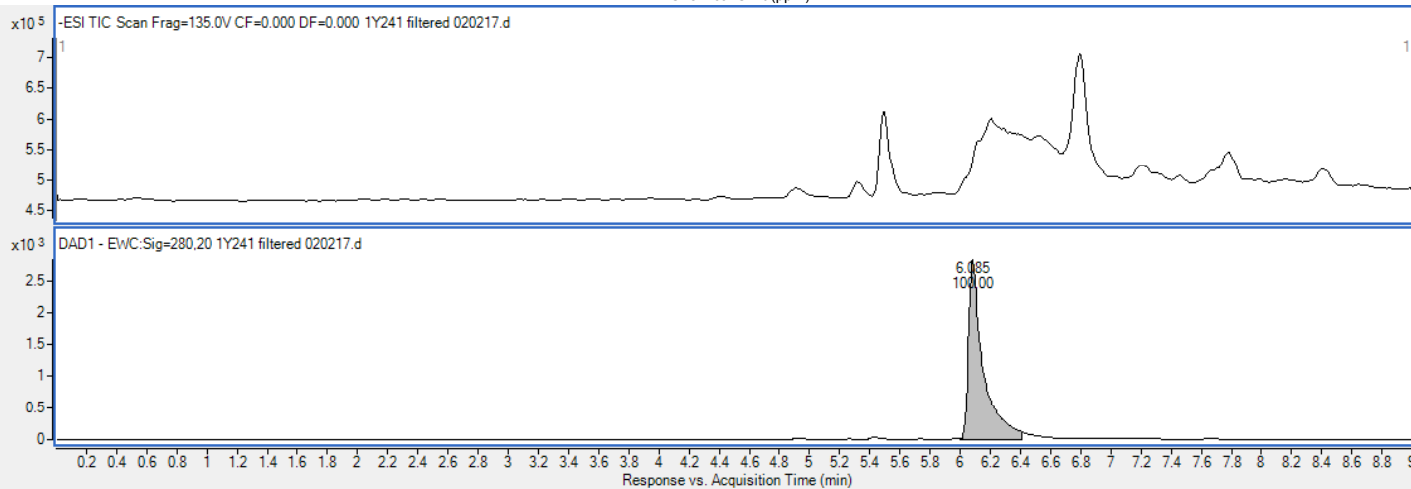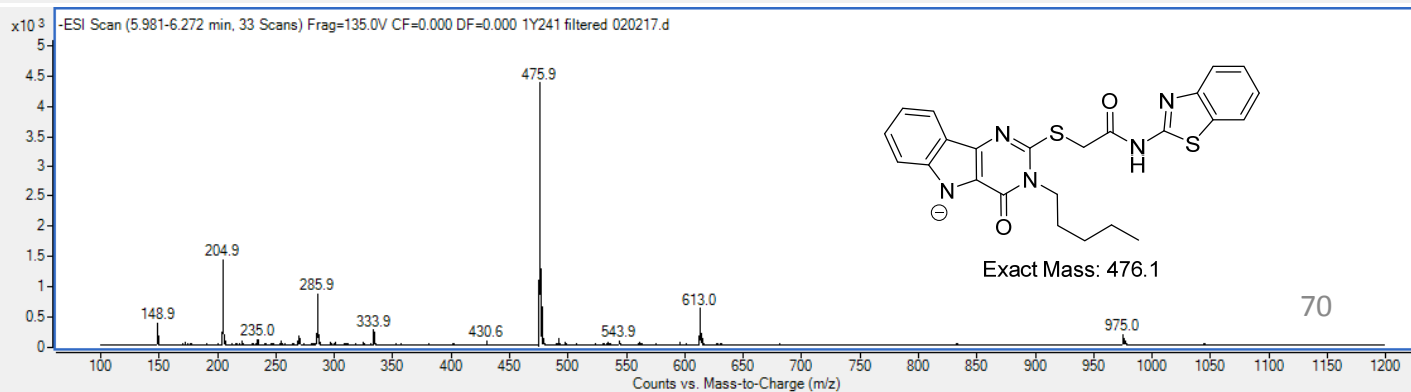

# <sup>1</sup>H NMR, LC-MS

# 9b

4/21/2017 10:18:12 AM

| Acquisition Time (sec) | 2.0130      | Comment        | STANDARD 1H OBSERVE                                                      | Date                   | Mar 24 2017         |
|------------------------|-------------|----------------|--------------------------------------------------------------------------|------------------------|---------------------|
| Date Stamp             | Mar 24 2017 | File Name      | C:\Documents and Settings\Mycoahhh\My Documents\NMR\michan\1y242.fid\fid |                        |                     |
| Frequency (MHz)        | 399.91      | Nucleus        | 1H                                                                       | Number of Transients   | 16                  |
| Points Count           | 16384       | Pulse Sequence | s2pul                                                                    | Receiver Gain          | 30.00               |
| Spectrum Offset (Hz)   | 2030.4821   | Spectrum Type  | STANDARD                                                                 | Sweep Width (Hz)       | 7993.60             |
|                        |             |                |                                                                          | Original Points Count  | 16091               |
|                        |             |                |                                                                          | Solvent                | DMSO-d6             |
|                        |             |                |                                                                          | Temperature (degree C) | AMBIENT TEMPERATURE |

<sup>1</sup>H NMR (400 MHz, DMSO-d<sub>6</sub>) δ 12.82 (s, 1H), 11.95 (s, 1H), 7.81 (d, *J* = 7.81 Hz, 1H), 7.70 (s, 1H), 7.72 (d, *J* = 8.29 Hz, 1H), 7.42 (d, *J* = 8.29 Hz, 1H), 7.32 (t, *J* = 7.81 Hz, 1H), 7.27 (d, *J* = 8.29 Hz, 1H), 6.93 (t, *J* = 7.07 Hz, 1H), 4.37 (s, 2H), 4.07 - 4.21 (m, 2H), 2.39 (s, 3H), 1.77 (quin, *J* = 7.30 Hz, 2H), 1.31 - 1.47 (m, 4H), 0.92 (t, *J* = 6.83 Hz, 3H)

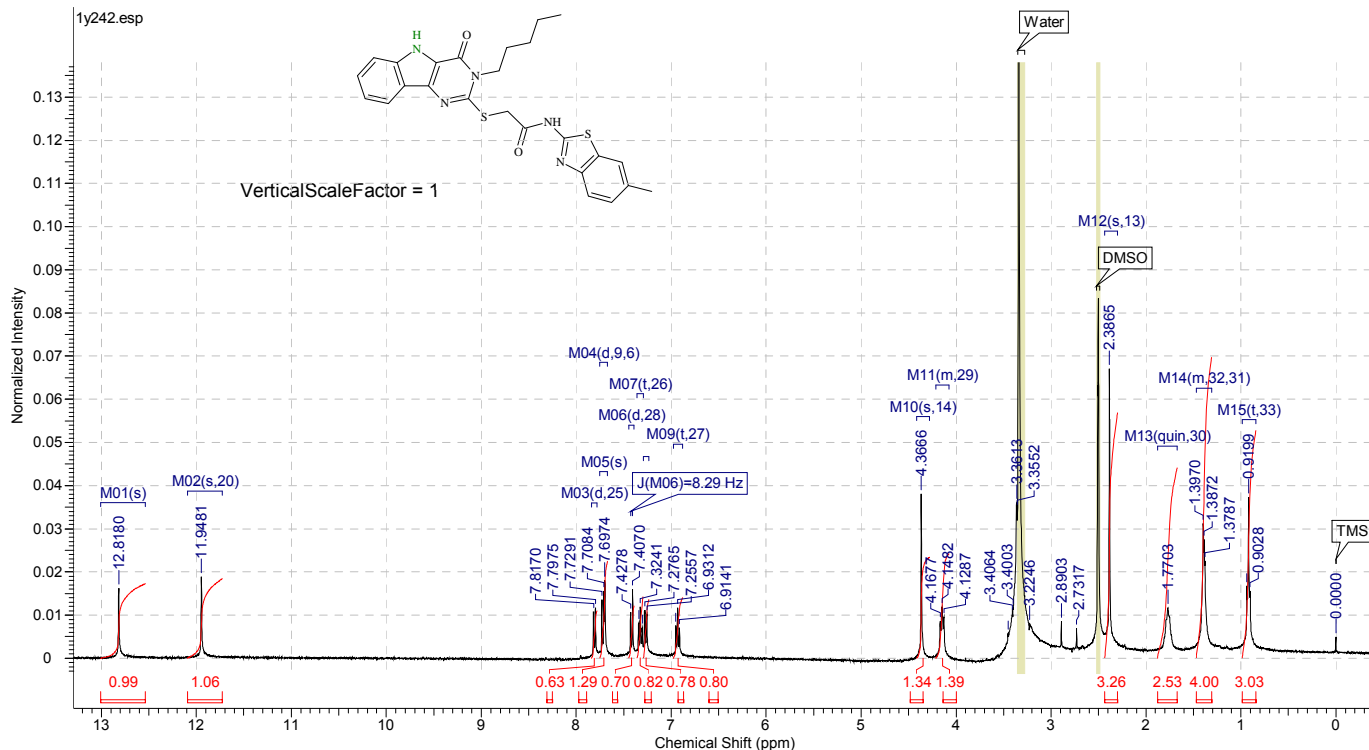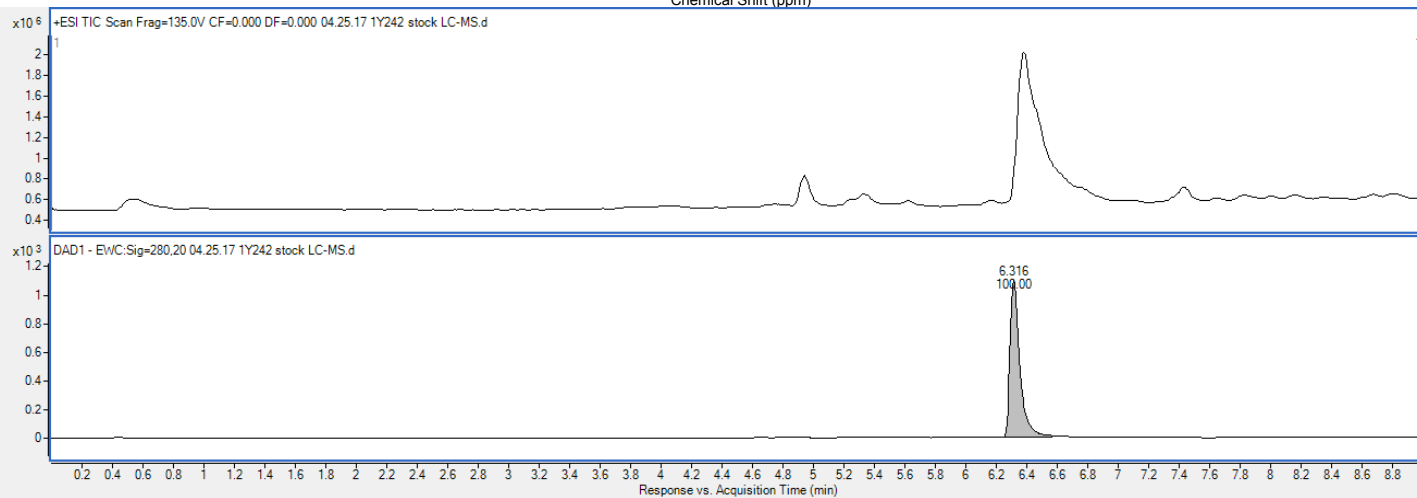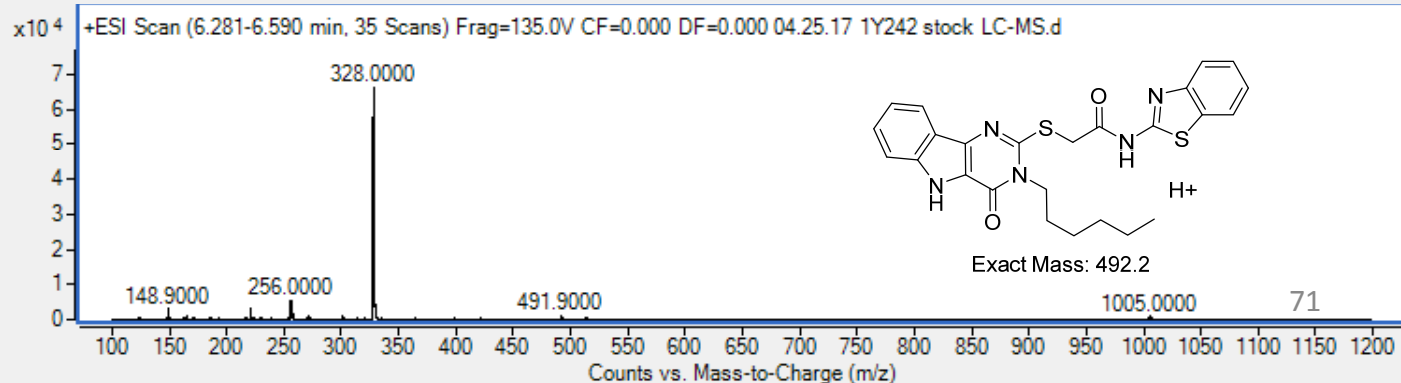

# <sup>1</sup>H NMR, LC-MS

# 10a

4/21/2017 10:19:57 AM

| Acquisition Time (sec) | 2.0065      | Comment        | STANDARD 1H OBSERVE                                                      | Date                  | Mar 24 2017 |                        |                     |
|------------------------|-------------|----------------|--------------------------------------------------------------------------|-----------------------|-------------|------------------------|---------------------|
| Date Stamp             | Mar 24 2017 | File Name      | C:\Documents and Settings\Mycoahhh\My Documents\NMR\michan\2b156.fid\fid |                       |             |                        |                     |
| Frequency (MHz)        | 399.91      | Nucleus        | 1H                                                                       | Original Points Count | 16039       |                        |                     |
| Points Count           | 16384       | Pulse Sequence | s2pul                                                                    | Receiver Gain         | 24.00       | Solvent                | DMSO-d6             |
| Spectrum Offset (Hz)   | 2029.0510   | Spectrum Type  | STANDARD                                                                 | Sweep Width (Hz)      | 7993.60     | Temperature (degree C) | AMBIENT TEMPERATURE |

<sup>1</sup>H NMR (400 MHz, DMSO-d<sub>6</sub>) δ 12.90 (br. s., 1H), 11.94 (s, 1H), 7.91 (d, *J* = 7.81 Hz, 1H), 7.84 (d, *J* = 7.80 Hz, 1H), 7.80 (d, *J* = 7.81 Hz, 1H), 7.45 (t, *J* = 7.81 Hz, 1H), 7.41 (d, *J* = 8.29 Hz, 1H), 7.32 (t, *J* = 7.30 Hz, 1H), 7.28 (t, *J* = 7.80 Hz, 1H), 6.92 (t, *J* = 7.07 Hz, 1H), 4.38 (s, 2H), 4.07 - 4.25 (m, 2H), 1.76 (quin, *J* = 7.30 Hz, 2H), 1.26 - 1.52 (m, 6H), 0.89 (t, *J* = 7.32 Hz, 3H)

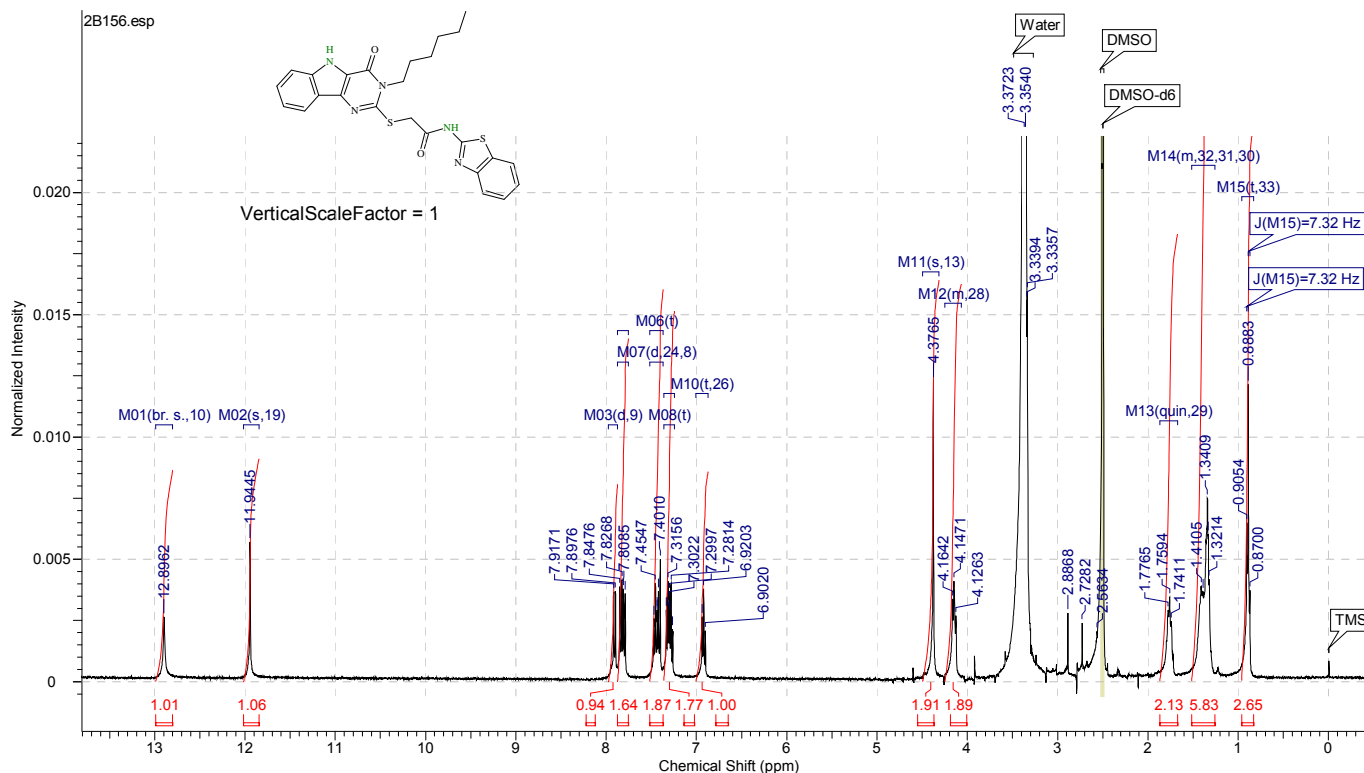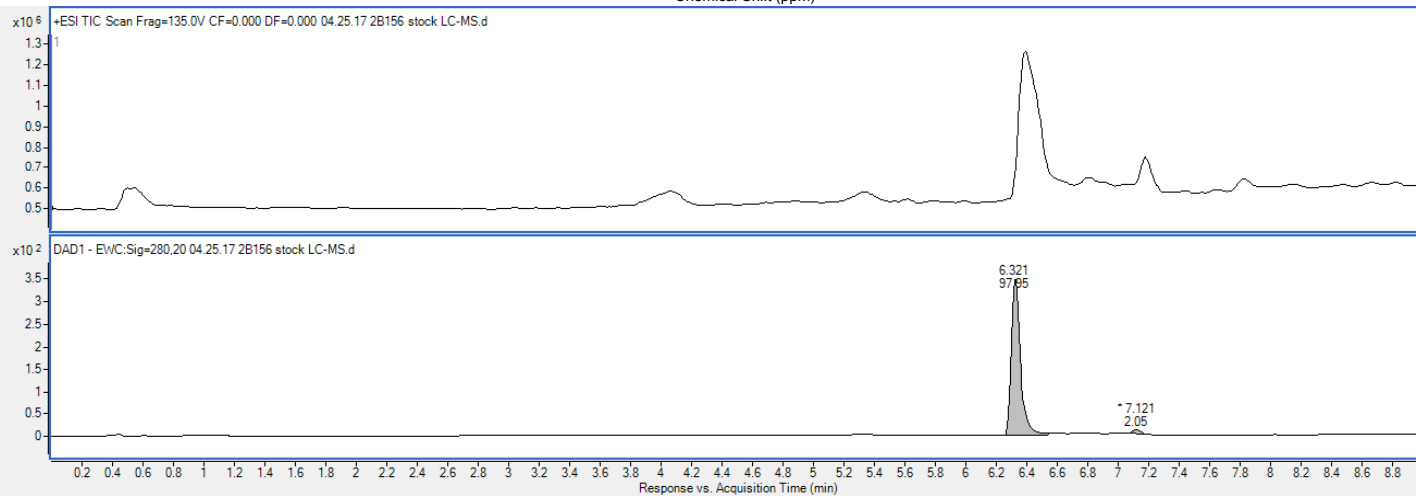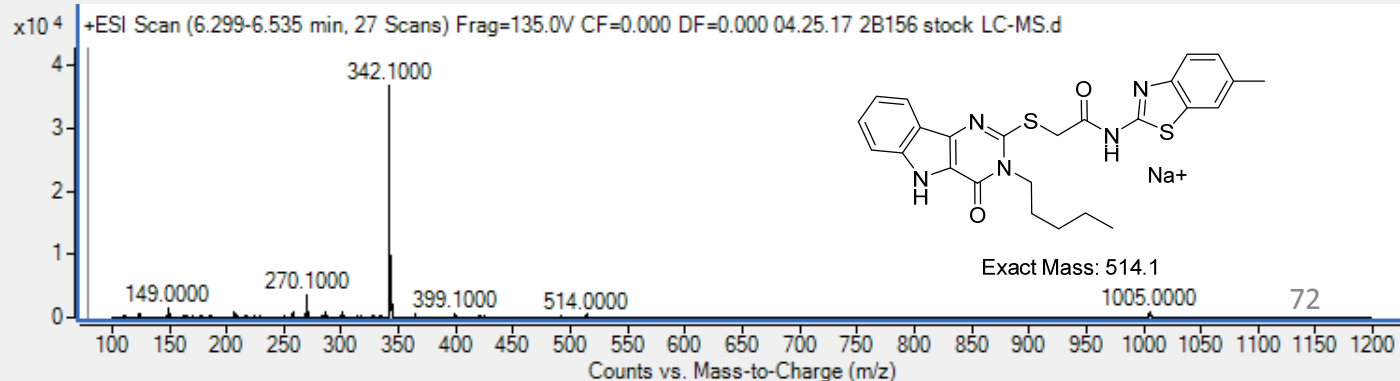



# <sup>1</sup>H NMR, LC-MS

# 10b

4/20/2017 2:14:44 PM

| Acquisition Time (sec) | 2.0049      | Comment        | STANDARD 1H OBSERVE                                                     |                      | Date    | Mar 24 2017            |                     |
|------------------------|-------------|----------------|-------------------------------------------------------------------------|----------------------|---------|------------------------|---------------------|
| Date Stamp             | Mar 24 2017 | File Name      | C:\Documents and Settings\Mycoahhh\My Documents\NMR\mchan\2b157.fid\fid |                      |         |                        |                     |
| Frequency (MHz)        | 399.91      | Nucleus        | 1H                                                                      | Number of Transients | 16      | Original Points Count  | 16026               |
| Points Count           | 16384       | Pulse Sequence | s2pul                                                                   | Receiver Gain        | 30.00   | Solvent                | DMSO-d6             |
| Spectrum Offset (Hz)   | 2028.5632   | Spectrum Type  | STANDARD                                                                | Sweep Width (Hz)     | 7993.60 | Temperature (degree C) | AMBIENT TEMPERATURE |

<sup>1</sup>H NMR (400 MHz, DMSO-d<sub>6</sub>) δ 12.81 (s, 1H), 11.95 (s, 1H), 7.80 (d, *J* = 7.81 Hz, 1H), 7.69 (s, 1H), 7.72 (d, *J* = 7.81 Hz, 1H), 7.39 - 7.45 (m, 1H), 7.29 - 7.35 (m, 1H), 7.26 (d, *J* = 8.29 Hz, 1H), 6.93 (t, *J* = 7.32 Hz, 1H), 4.36 (s, 2H), 4.09 - 4.19 (m, 2H), 2.38 (s, 3H), 1.76 (quin, *J* = 7.80 Hz, 2H), 1.23 - 1.50 (m, 6H), 0.89 (t, *J* = 6.83 Hz, 3H)

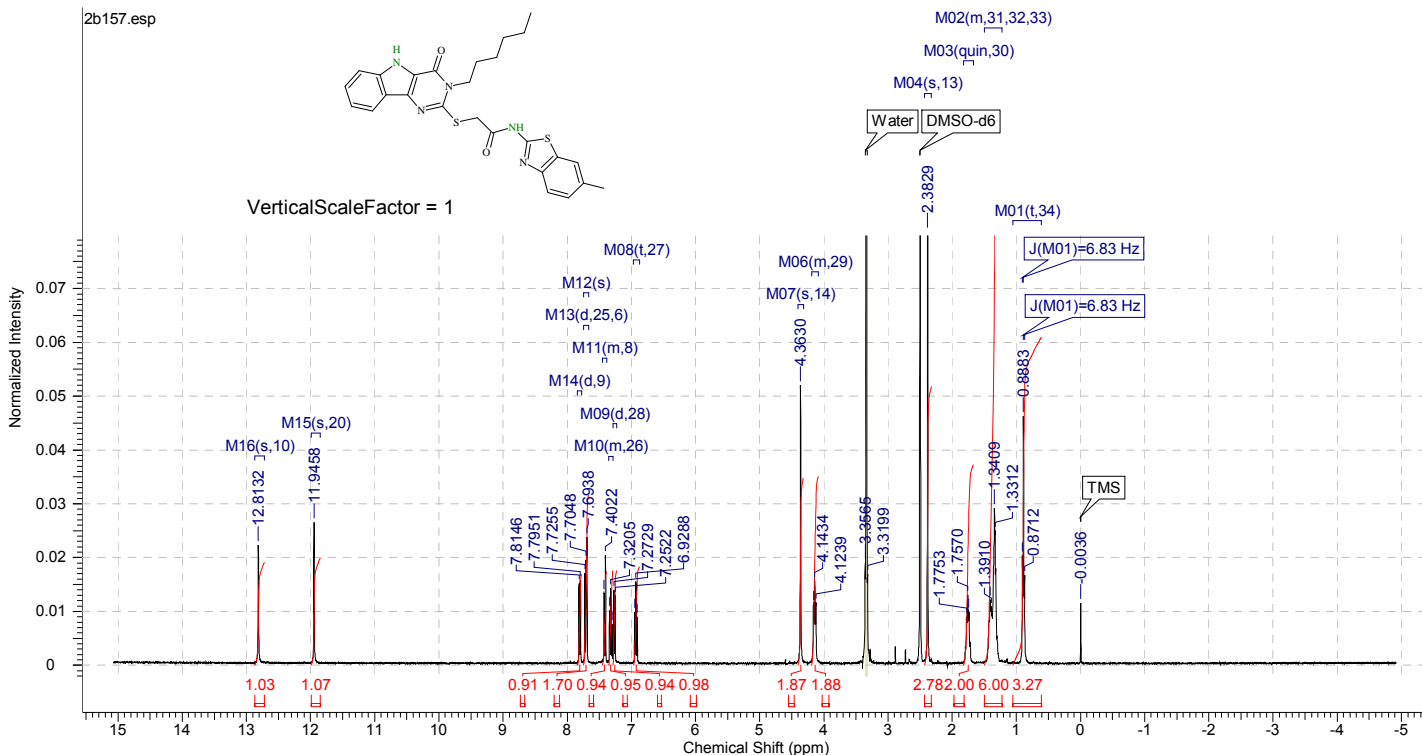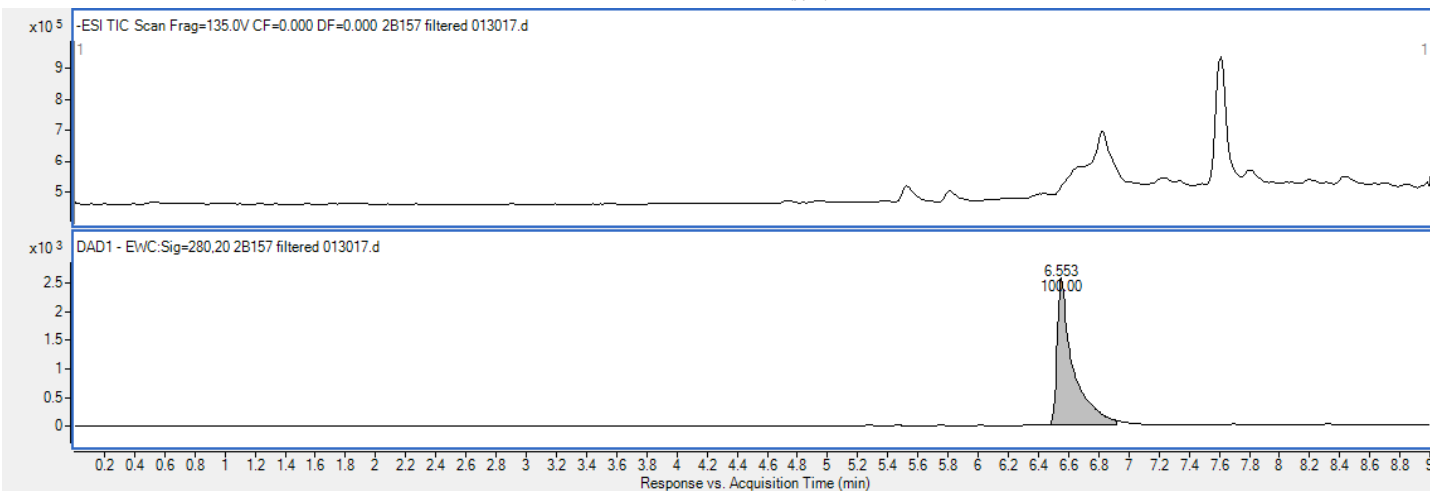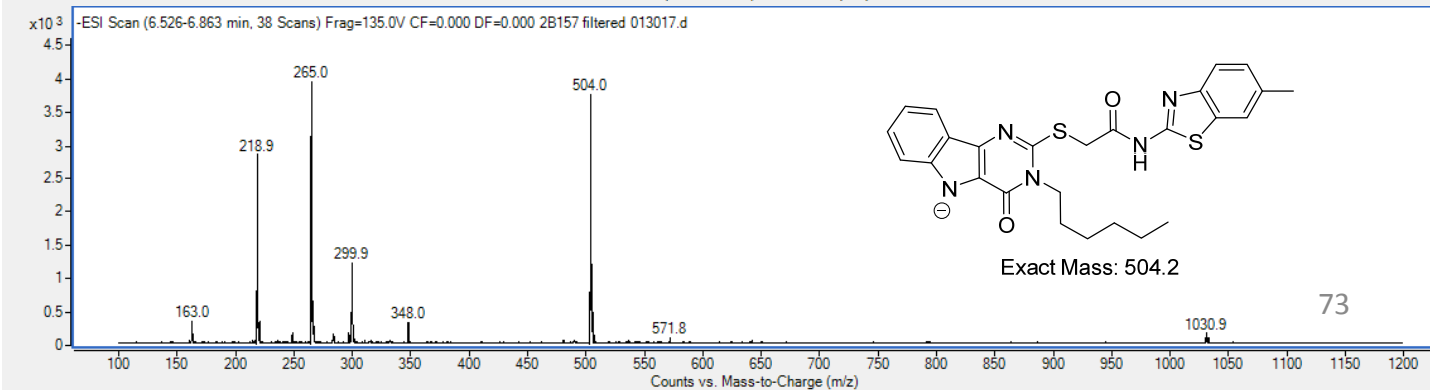

# <sup>1</sup>H NMR, LC-MS

# 11

4/21/2017 10:24:10 AM

| Acquisition Time (sec) | 2.0016      | Comment        | STANDARD 1H OBSERVE                                                    | Date                   | Mar 24 2017         |
|------------------------|-------------|----------------|------------------------------------------------------------------------|------------------------|---------------------|
| Date Stamp             | Mar 24 2017 | File Name      | C:\Documents and Settings\Mycoahhh\My Documents\NMR\michan2d89.fid\fid |                        |                     |
| Frequency (MHz)        | 399.91      | Nucleus        | 1H                                                                     | Number of Transients   | 16                  |
| Points Count           | 16384       | Pulse Sequence | s2pul                                                                  | Receiver Gain          | 30.00               |
| Spectrum Offset (Hz)   | 2028.2289   | Spectrum Type  | STANDARD                                                               | Sweep Width (Hz)       | 7987.22             |
|                        |             |                |                                                                        | Solvent                | DMSO-d6             |
|                        |             |                |                                                                        | Temperature (degree C) | AMBIENT TEMPERATURE |

<sup>1</sup>H NMR (400 MHz, DMSO-d<sub>6</sub>) δ 12.90 (s, 1H), 7.90 (d, *J* = 7.80 Hz, 1H), 7.84 (d, *J* = 7.80 Hz, 2H), 7.56 (d, *J* = 8.78 Hz, 1H), 7.45 (t, *J* = 7.80 Hz, 1H), 7.40 (t, *J* = 7.30 Hz, 1H), 7.28 (t, *J* = 7.56 Hz, 1H), 6.96 (t, *J* = 7.56 Hz, 1H), 4.38 (s, 2H), 4.10 - 4.16 (m, 2H), 4.08 (s, 3H), 1.74 (quin, *J* = 15.10 Hz, 2H), 1.44 (sxt, *J* = 7.31 Hz, 2H), 0.98 (t, *J* = 7.31 Hz, 3H)

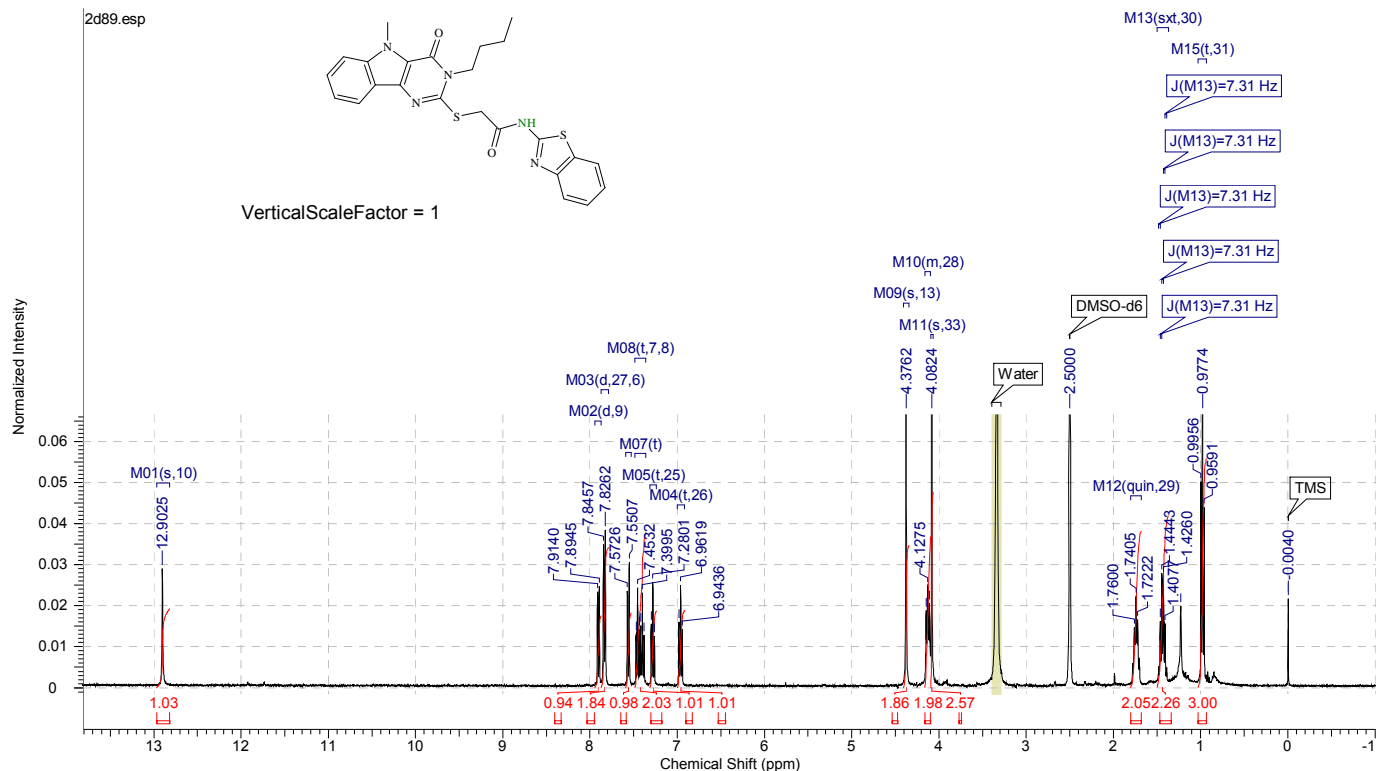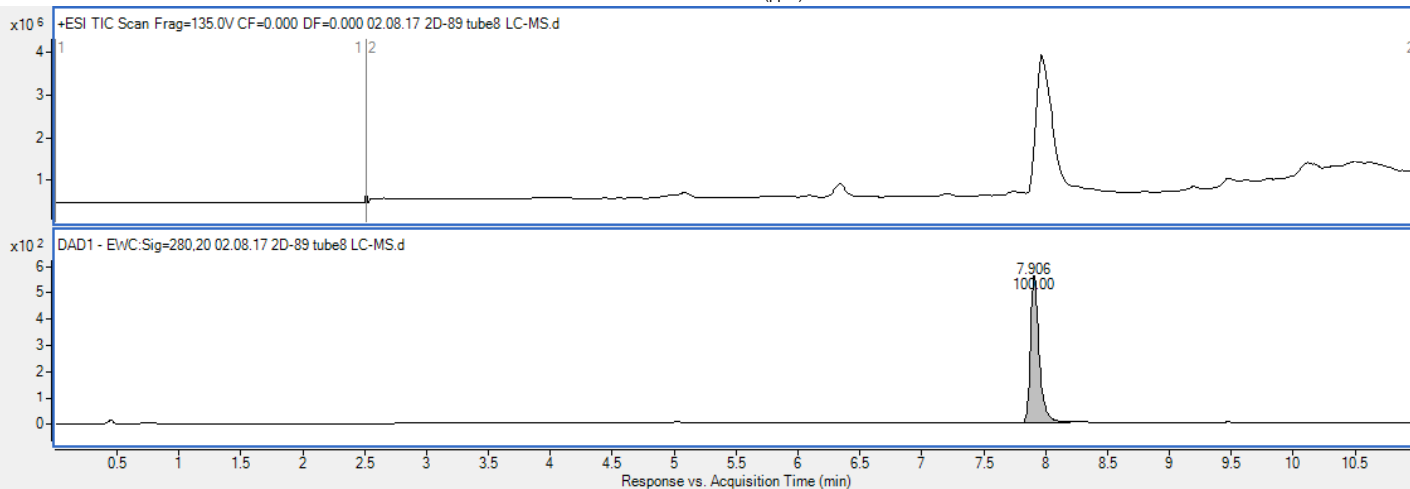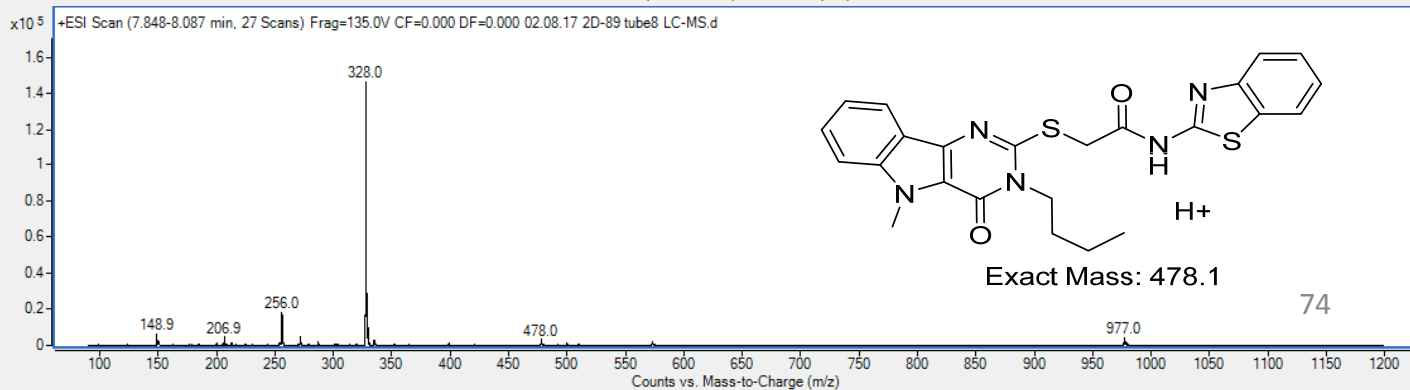

# <sup>1</sup>H NMR, LC-MS

# 12

4/21/2017 10:34:02 AM

| Acquisition Time (sec) | 2.0146      | Comment        | STANDARD 1H OBSERVE                                                     |                      | Date    | Mar 24 2017            |                     |
|------------------------|-------------|----------------|-------------------------------------------------------------------------|----------------------|---------|------------------------|---------------------|
| Date Stamp             | Mar 24 2017 | File Name      | C:\Documents and Settings\Mycoahhh\My Documents\NMR\michan\2d87.fid\fid |                      |         |                        |                     |
| Frequency (MHz)        | 399.91      | Nucleus        | 1H                                                                      | Number of Transients | 16      | Original Points Count  | 16104               |
| Points Count           | 16384       | Pulse Sequence | s2pul                                                                   | Receiver Gain        | 30.00   | Solvent                | DMSO-d6             |
| Spectrum Offset (Hz)   | 2029.5062   | Spectrum Type  | STANDARD                                                                | Sweep Width (Hz)     | 7993.60 | Temperature (degree C) | AMBIENT TEMPERATURE |

<sup>1</sup>H NMR (400 MHz, DMSO-d<sub>6</sub>) δ 12.82 (s, 1H), 7.84 (d, *J* = 7.81 Hz, 1H), 7.72 (d, *J* = 8.29 Hz, 1H), 7.67 - 7.74 (m, 1H), 7.57 (d, *J* = 8.29 Hz, 1H), 7.41 (t, *J* = 7.81 Hz, 1H), 7.26 (d, *J* = 8.29 Hz, 1H), 6.97 (t, *J* = 7.80 Hz, 1H), 4.36 (s, 2H), 4.09 (s, 3H), 4.13 (t, *J* = 7.80 Hz, 2H), 2.38 (s, 3H), 1.74 (quin, *J* = 7.81 Hz, 2H), 1.44 (sxt, *J* = 7.32 Hz, 2H), 0.98 (t, *J* = 7.32 Hz, 3H)

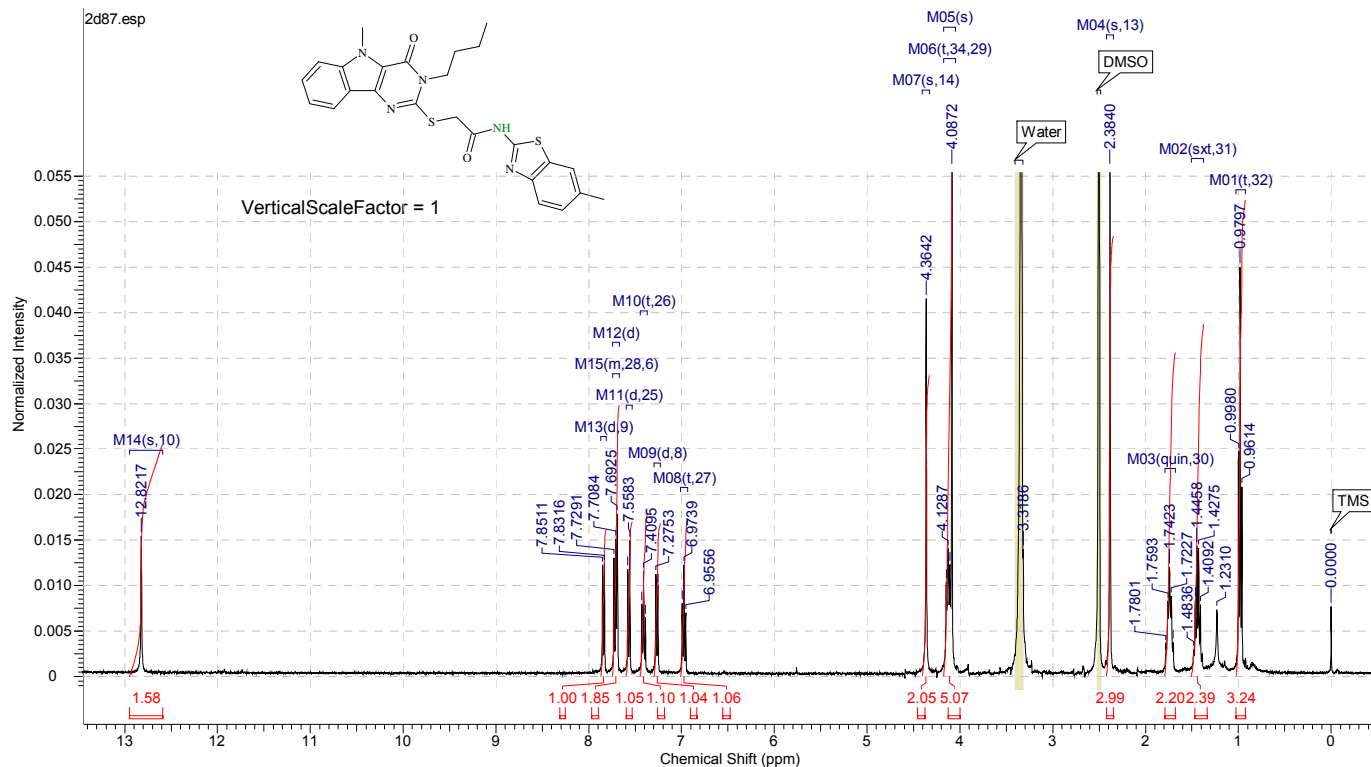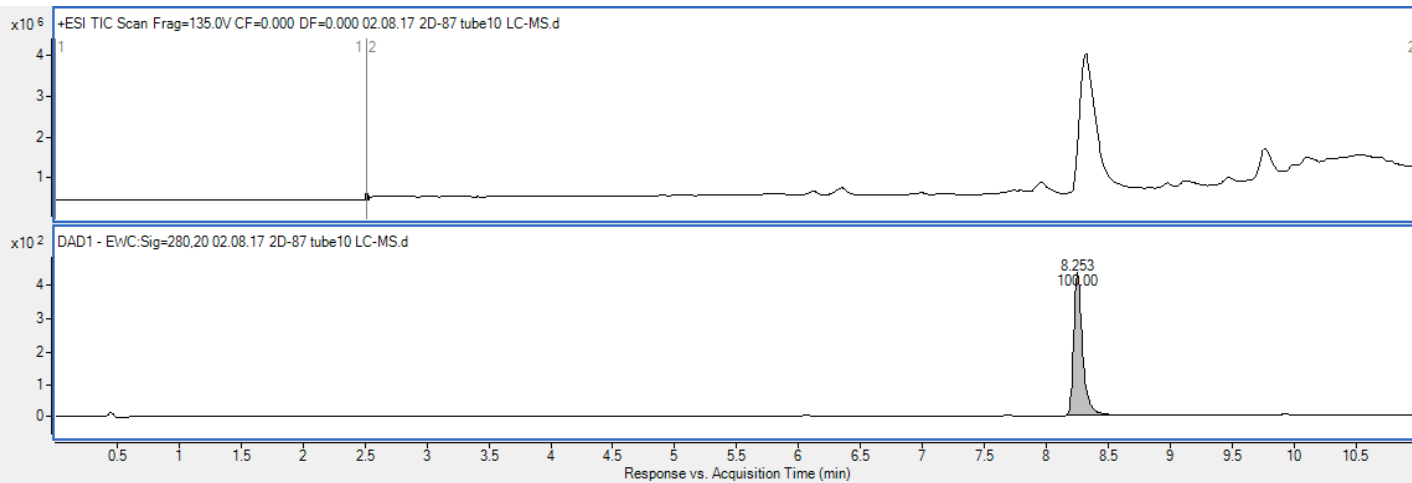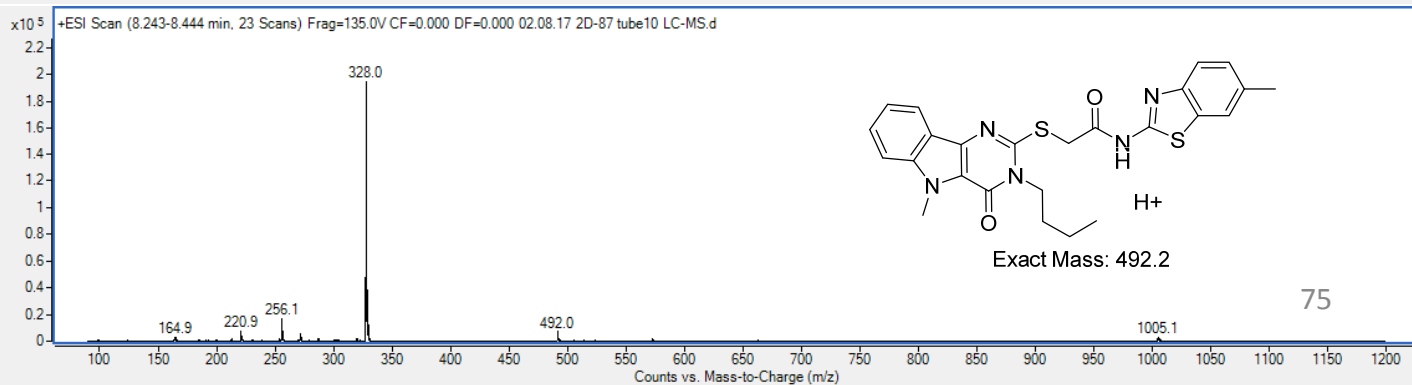

Supplement: NIHMS937657-supplement-Supporting_information.pdf [file NIHMS937657-supplement-Supporting_information.pdf]
